# Supplementary material for: Quantitative Proteomics of Human Retinal Pigment Epithelium Reveals Key Regulators for the Pathogenesis of Age-Related Macular Degeneration
Source: MDPI journal article supplement (doi:10.3390/ijms24043252), 2023-02-07
Supplement: s1 [file s1]

# Large-Scale Quantitative Proteomics of Human Retinal Mitochondria-Enriched Fractions Reveals Key Regulators for the Early Pathogenesis of Age-Related Macular Degeneration

Shichen Shen <sup>1,2</sup>, Rebecca J. Kapphahn <sup>3</sup>, Ming Zhang <sup>1,2</sup>, Shuo Qian <sup>4</sup>, Sandra R. Montezuma <sup>3</sup>, Peng Shang<sup>5</sup>, Deborah A. Ferrington <sup>3,5,\*</sup>, and Jun Qu <sup>1,2,\*</sup>

<sup>1</sup> Department of Pharmaceutical Sciences, University at Buffalo, Buffalo, NY 14214, USA

<sup>2</sup> New York State Center of Excellence in Bioinformatics and Life Sciences, Buffalo, NY 14203, USA

<sup>3</sup> Department of Ophthalmology and Visual Neurosciences, University of Minnesota, Minneapolis, MN 55455, USA

<sup>4</sup> Department of Cell Stress Biology, Roswell Park Comprehensive Cancer Center, Buffalo, NY 14203, USA

<sup>5</sup> Doheny Eye Institute, Pasadena, CA 91103

\* Correspondence: [DFerrington@doheny.org](mailto:DFerrington@doheny.org) (D.A.F.); [junqu@buffalo.edu](mailto:junqu@buffalo.edu) (J.Q.); Tel.: +1-(323)342-6404 (D.A.F.); +1-(716)645-4821 (J.Q.)

## Supplementary Materials

Supplementary Figure S1 – S6

Supplementary Table S1 – S7

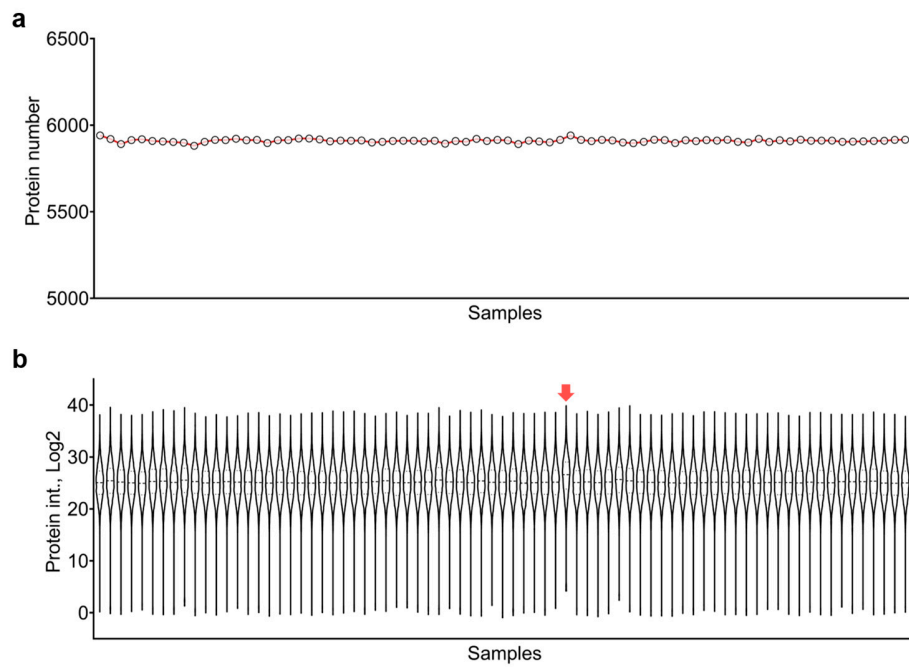

**Supplementary Figure S1.** Proteomic profiles of the 77 retinal pigment epithelium (RPE) mitochondria-enriched fraction samples. (a) Number of proteins quantified in individual samples; (b) Log2 protein mass spectrometry (MS) intensities of individual samples. The red arrow denotes the 1 sample (M2\_S2\_2) with abnormal MS intensities.

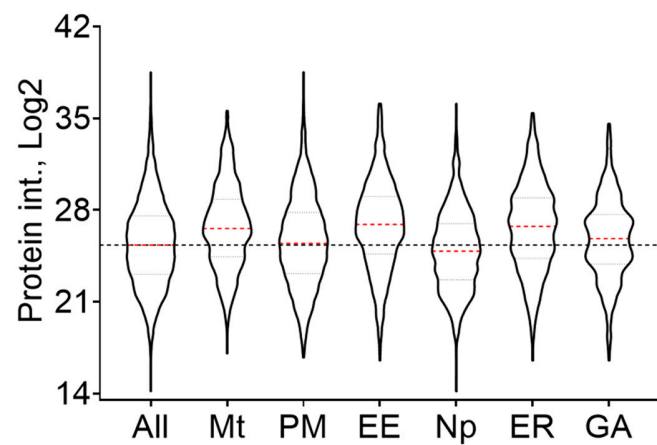

**Supplementary Figure S2.** MS intensities distribution of proteins enriched in major cellular compartments. All: all proteins; Mt: mitochondrion; PM: plasma membrane; EE: extracellular exosomes; Np: nucleoplasm; ER: endoplasmic reticulum; GA: Golgi apparatus.

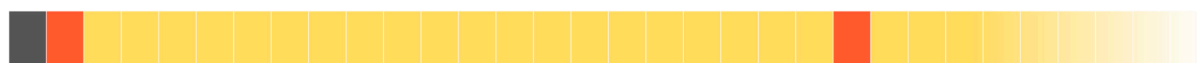

- Benchmark samples (Human cancer cell line digest) for system performance evaluation
- Quality control (QC) samples (pooled aliquots of randomly selected samples) for LC-MS stability monitoring
- Analytical samples, analyzed in a random order

**Supplementary Figure S3.** A standardized LC-MS scheme allowing monitoring and evaluation of reproducibility during the analysis queue.

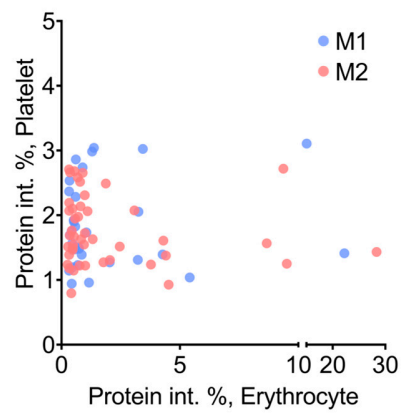

**Supplementary Figure S4.** Correlation plot between the percentage of erythrocyte- and platelet-specific proteins in all samples.

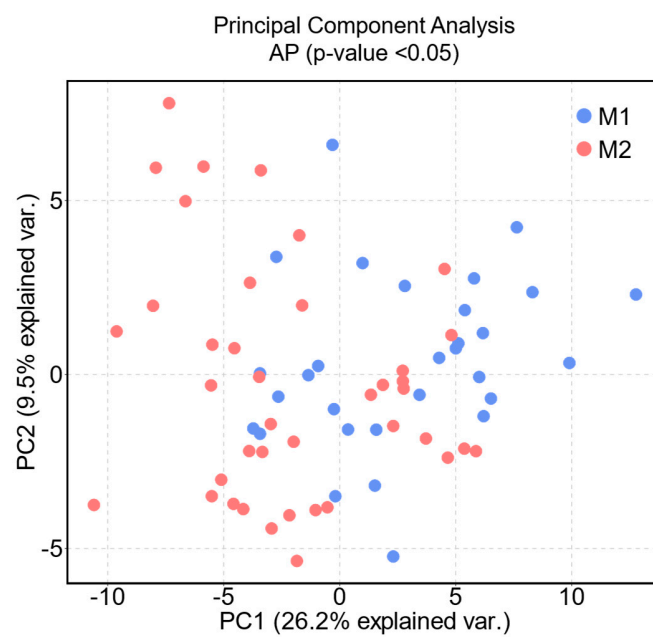

**Supplementary Figure S5.** Principal Component Analysis (PCA) of M1 and M2 samples using the 132 altered proteins (APs).

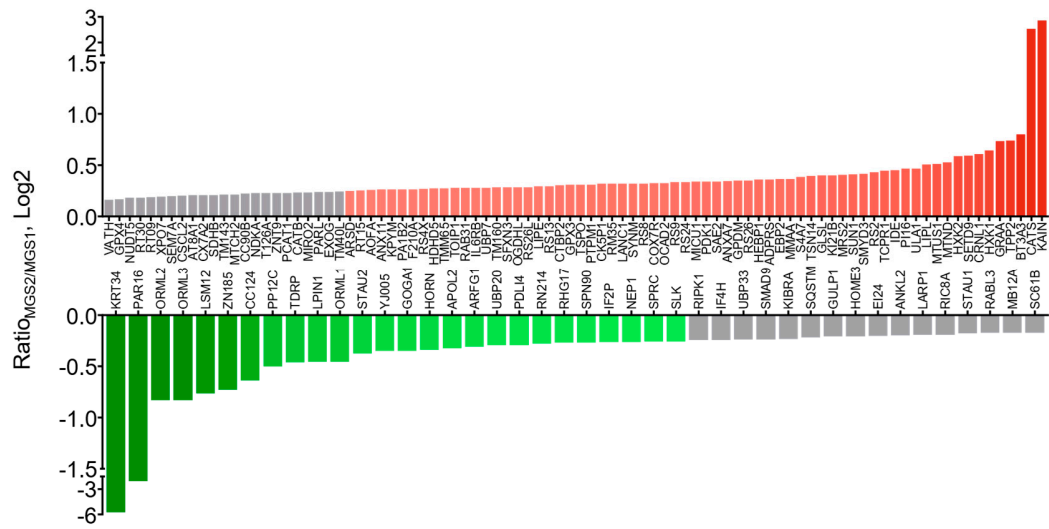

**Supplementary Table S1.** Demographic profiles of donors involved in the current study.

**Supplementary Table S2.** Quantification results of 5,941 proteins in 77 RPE mitochondria-enriched fractions from human donors w/ and w/o AMD.

**Supplementary Table S3.** Proteomic quantification results of the 5 QC sample runs.

**Supplementary Table S4.** Percentage of MS intensities of the 16 quality markers within each sample. Samples removed are highlighted in red.

**Supplementary Table S5.** Quantification results of 5,941 proteins after removing 7 outlier samples with high blood protein percentages and abnormal MS intensities.

**Supplementary Table S6.** A total of 132 altered proteins (APs) determined by Welch's t-test.

**\*\*All Supplementary Tables are provided as separate Excel files.**
