# Supplementary material for: Quantitative Proteomics of Human Retinal Pigment Epithelium Reveals Key Regulators for the Pathogenesis of Age-Related Macular Degeneration
Source: Int J Mol Sci. 2023 Feb 7;24(4):3252. doi: 10.3390/ijms24043252 (PMC9959910; doi:10.3390/ijms24043252)
Supplement: Supplementary file 1 [file ijms-24-03252-s001.zip]

Archive with 14 entries (14 files):
- Figure S1.svg
- Figure S2.svg
- Figure S3.svg
- Figure S4.svg
- Figure S5.svg
- Figure S6.svg
- Supplementary materials.pdf
- Table S1.xlsx
- Table S2.xlsx
- Table S3.xlsx
- Table S4.xlsx
- Table S5.xlsx
- Table S6.xlsx
- Table S7.xlsx
