# Supplementary material for: Quantitative Proteomics of Human Retinal Pigment Epithelium Reveals Key Regulators for the Pathogenesis of Age-Related Macular Degeneration
Source: Int J Mol Sci. 2023 Feb 7;24(4):3252. doi: 10.3390/ijms24043252 (PMC9959910; doi:10.3390/ijms24043252)
Supplement: Supplementary file 1 [file ijms-24-03252-s001.zip › Table S1.xlsx]

## Sheet: Table S1
Table S1. Demographic profiles of donors involved in the current study.
	MGS1	MGS2
Age	76.8 (±10.6)	79.8 (±10.4)
Sex	M(16), F(16)	M(22), F(23)
