# Supplementary material for: Quantitative Proteomics of Human Retinal Pigment Epithelium Reveals Key Regulators for the Pathogenesis of Age-Related Macular Degeneration
Source: Int J Mol Sci. 2023 Feb 7;24(4):3252. doi: 10.3390/ijms24043252 (PMC9959910; doi:10.3390/ijms24043252)
Supplement: Supplementary file 1 [file ijms-24-03252-s001.zip › Table S2.xlsx]

## Sheet: Table S2
Table S2. Quantification results of 5,941 proteins in 77 RPE mitochondria-enriched fractions from human donors w/ and w/o AMD.
ProteinAC	ProteinID	Protein name	Gene name(s)	Peptide #	M1_S1_2	M1_S1_3	M1_S1_4	M1_S1_5	M1_S1_6	M1_S1_7	M1_S1_8	M1_S1_9	M1_S1_10	M1_S1_11	M1_S1_12	M1_S2_1	M1_S2_2	M1_S2_3	M1_S2_4	M1_S2_5	M1_S2_6	M1_S2_7	M1_S2_8	M1_S2_9	M1_S2_10	M1_S2_11	M1_S2_12	M1_S2_13	M1_S2_14	M1_S2_15	M1_S2_16	M1_S2_17	M1_S2_18	M1_S2_19	M1_S2_20	M1_S2_21	M2_S1_1	M2_S1_2	M2_S1_3	M2_S1_4	M2_S1_5	M2_S1_6	M2_S1_7	M2_S1_8	M2_S1_9	M2_S1_10	M2_S1_11	M2_S2_1	M2_S2_2
P31946	1433B_HUMAN	14-3-3 protein beta/alpha (Protein 1054) (Protein kinase C inhibitor protein 1) (KCIP-1) [Cleaved into: 14-3-3 protein beta/alpha, N-terminally processed]	YWHAB	13	30.084	30.2977	30.0437	29.4554	29.5533	30.233	30.1897	29.3145	29.9717	30.185	30.1269	30.3901	29.8652	30.1609	30.3249	29.7668	29.8982	30.0378	29.8309	29.6872	29.7569	30.1647	29.7061	30.0724	30.0404	29.9494	30.0915	30.6274	29.5363	29.3391	30.3374	30.4848	30.2227	29.8348	29.9114	30.1537	30.235	29.4361	30.5754	30.2668	29.6807	29.8585	30.0043	29.4502	31.1139
P62258	1433E_HUMAN	14-3-3 protein epsilon (14-3-3E)	YWHAE	24	32.2156	31.4375	30.8845	30.4081	30.5335	31.0416	30.9195	30.3439	30.887	31.0919	30.922	31.2189	30.6603	31.2571	31.1681	30.6865	30.8521	30.8279	30.694	30.5975	30.7466	30.9361	30.6098	30.8787	30.9323	30.9133	30.9792	31.5984	30.7296	30.4487	31.4283	31.3834	31.1193	30.7915	30.5864	31.6543	31.4661	30.8717	31.7453	31.388	30.723	31.1522	30.9724	30.5998	32.9236
Q04917	1433F_HUMAN	14-3-3 protein eta (Protein AS1)	YWHAH YWHA1	10	26.7043	26.5618	26.4543	26.3086	26.3214	26.5308	26.1157	26.0641	26.1155	26.2426	26.5455	26.3308	26.0506	26.5293	26.2696	25.7223	26.0804	26.121	26.056	26.0831	25.9871	26.0691	25.9983	25.8964	25.9892	25.9472	26.5803	26.9522	25.52	25.8775	26.3923	26.363	26.4502	27.2629	25.8888	26.7076	26.8719	26.5034	27.0914	26.7183	26.3052	26.1934	26.1494	25.3369	28.7124
P61981	1433G_HUMAN	14-3-3 protein gamma (Protein kinase C inhibitor protein 1) (KCIP-1) [Cleaved into: 14-3-3 protein gamma, N-terminally processed]	YWHAG	14	29.9862	30.0645	29.627	29.1998	29.1451	29.8916	29.5909	29.0898	29.7597	29.8427	29.833	30.1495	29.5527	29.972	30.1081	29.3432	29.8	29.6832	29.6343	29.4921	29.5297	29.9024	29.5161	29.6869	29.8505	29.7666	30.0466	30.4337	29.1209	29.1586	30.1413	30.2431	29.7823	29.8386	29.2552	30.2158	30.0085	29.2313	30.3912	29.9756	29.4472	29.8476	29.6788	28.7658	31.2385
P31947	1433S_HUMAN	14-3-3 protein sigma (Epithelial cell marker protein 1) (Stratifin)	SFN HME1	2	29.6301	29.6876	29.2525	28.7563	28.5605	29.5366	29.287	28.7043	29.4984	29.5541	29.3655	29.8155	29.0439	29.6177	29.7413	28.872	29.2061	29.2479	29.0273	29.0018	28.9534	29.4582	29.0852	29.3493	29.4495	29.3147	29.5305	29.9498	28.7613	28.6368	29.6558	29.9036	29.4906	29.1959	28.8881	29.7195	29.7123	28.7424	30.1304	29.5549	29.0268	29.3987	29.3441	28.3093	30.0484
P27348	1433T_HUMAN	14-3-3 protein theta (14-3-3 protein T-cell) (14-3-3 protein tau) (Protein HS1)	YWHAQ	15	28.346	28.5447	28.0641	27.6162	27.177	28.1933	28.218	27.2858	27.6684	28.0523	27.9964	28.2505	27.9214	27.919	28.4825	28.1134	28.1597	28.1604	27.9398	27.5932	27.9914	27.8841	27.4209	28.0486	27.9201	28.1248	28.1766	28.5982	27.3276	27.3602	28.4087	28.2918	28.2682	27.8138	27.7714	28.3449	28.3979	27.5466	28.5405	28.5647	27.7249	28.0053	28.1659	27.269	29.9498
P63104	1433Z_HUMAN	14-3-3 protein zeta/delta (Protein kinase C inhibitor protein 1) (KCIP-1)	YWHAZ	16	30.6722	30.5132	30.1423	29.726	29.5444	30.2642	29.9834	29.7952	30.3579	30.185	30.1988	30.4934	29.9158	30.3946	30.4807	29.8765	30.0652	30.1124	30.0351	29.8461	29.8544	30.2172	29.8247	30.1381	30.1663	30.0879	30.2914	30.8255	29.6991	29.4877	30.5716	30.4849	30.1724	30.4808	29.8375	30.598	30.4072	29.7675	31.0502	30.533	29.932	30.285	30.2329	29.4637	31.5055
Q15172	2A5A_HUMAN	Serine/threonine-protein phosphatase 2A 56 kDa regulatory subunit alpha isoform (PP2A B subunit isoform B'-alpha) (PP2A B subunit isoform B56-alpha) (PP2A B subunit isoform PR61-alpha) (PR61alpha) (PP2A B subunit isoform R5-alpha)	PPP2R5A	1	24.5878	24.3867	23.7196	24.0439	23.9186	24.4875	24.256	23.388	24.5873	24.272	24.4728	23.3482	23.6581	23.3317	22.9096	22.512	22.4067	23.2611	22.6231	21.2451	22.471	22.4715	22.9799	22.7255	23.1458	22.3862	23.5781	24.2714	22.717	22.2335	23.4824	23.4617	24.4765	23.6748	24.0209	24.2398	24.488	24.4947	23.7267	24.6727	24.3235	23.9198	23.7588	23.2758	24.4213
Q15173	2A5B_HUMAN	Serine/threonine-protein phosphatase 2A 56 kDa regulatory subunit beta isoform (PP2A B subunit isoform B'-beta) (PP2A B subunit isoform B56-beta) (PP2A B subunit isoform PR61-beta) (PP2A B subunit isoform R5-beta)	PPP2R5B	3	21.2719	1.44552	19.9224	21.4469	20.5427	20.5931	20.7899	21.553	21.6867	20.1637	19.5843	21.1345	21.6664	21.4604	21.3235	20.9933	22.5147	21.1665	22.1284	21.6094	21.5315	22.6255	20.4875	20.4444	20.8181	22.3706	23.1718	21.6356	19.2116	21.7488	21.132	20.2871	18.9781	21.2083	20.8318	21.1158	20.2194	20.3383	19.0419	21.6812	21.0826	21.9548	21.0476	19.259	21.5875
Q14738	2A5D_HUMAN	Serine/threonine-protein phosphatase 2A 56 kDa regulatory subunit delta isoform (PP2A B subunit isoform B'-delta) (PP2A B subunit isoform B56-delta) (PP2A B subunit isoform PR61-delta) (PP2A B subunit isoform R5-delta)	PPP2R5D	12	25.6365	25.6462	25.1463	25.8265	26.27	25.7384	26.043	26.6574	26.6275	25.3259	25.5773	25.4744	25.5772	25.518	25.7661	24.9237	26.8808	25.5557	26.4966	26.5075	26.3303	27.0619	26.471	24.9138	25.5315	26.7876	27.4026	25.7311	24.8099	26.8649	25.5686	25.3764	25.4725	26.6733	26.0463	26.5608	26.1546	25.3889	25.9516	26.0162	25.662	26.5578	25.5811	24.7163	25.8956
Q16537	2A5E_HUMAN	Serine/threonine-protein phosphatase 2A 56 kDa regulatory subunit epsilon isoform (PP2A B subunit isoform B'-epsilon) (PP2A B subunit isoform B56-epsilon) (PP2A B subunit isoform PR61-epsilon) (PP2A B subunit isoform R5-epsilon)	PPP2R5E	4	23.4529	23.8263	23.8223	23.4241	23.3757	24.3585	23.5878	23.2172	23.9623	24.5293	23.7932	24.0684	23.4931	23.3004	24.0084	23.9037	23.4289	23.2922	23.657	23.8275	23.8581	23.2241	24.0345	23.2249	23.6267	23.9992	23.954	23.784	22.9906	23.5806	23.4623	24.1517	23.89	24.0628	23.4846	23.6532	24.1393	23.1761	23.9337	23.7234	22.9267	23.6611	24.3412	24.1131	23.9111
Q13362	2A5G_HUMAN	Serine/threonine-protein phosphatase 2A 56 kDa regulatory subunit gamma isoform (PP2A B subunit isoform B'-gamma) (PP2A B subunit isoform B56-gamma) (PP2A B subunit isoform PR61-gamma) (PP2A B subunit isoform R5-gamma) (Renal carcinoma antigen NY-REN-29)	PPP2R5C KIAA0044	4	24.0435	23.3545	23.1446	24.1809	23.9192	23.7563	23.8282	25.1248	24.8153	23.4703	23.6452	23.5798	23.8233	23.8372	23.8274	23.2535	24.8814	23.6969	24.4848	24.6757	24.6697	25.3124	25.5196	23.2187	23.7561	24.8911	25.744	24.1017	23.68	25.3179	23.4689	23.4918	23.514	24.9033	24.5187	24.7481	24.1519	23.7557	24.3947	23.9122	23.7635	24.5812	23.5965	23.4129	24.1314
P30153	2AAA_HUMAN	Serine/threonine-protein phosphatase 2A 65 kDa regulatory subunit A alpha isoform (Medium tumor antigen-associated 61 kDa protein) (PP2A subunit A isoform PR65-alpha) (PP2A subunit A isoform R1-alpha)	PPP2R1A	18	28.6564	29.2465	28.9408	28.1911	27.8894	29.2422	29.1382	28.3844	28.3372	29.1421	28.8143	29.0369	28.6877	28.7725	29.0642	28.6395	28.5606	28.9524	28.5013	28.306	28.348	28.6078	28.4499	28.8034	28.7586	28.8605	28.803	29.5039	28.4123	27.99	28.9936	29.2935	29.4807	28.5489	28.8225	29.0564	29.7712	28.2182	29.5072	29.4093	28.4355	28.828	28.9382	28.2464	29.4983
P30154	2AAB_HUMAN	Serine/threonine-protein phosphatase 2A 65 kDa regulatory subunit A beta isoform (PP2A subunit A isoform PR65-beta) (PP2A subunit A isoform R1-beta)	PPP2R1B	5	26.5164	27.7396	26.686	25.7952	25.7894	27.0957	27.1027	25.9333	26.6403	26.7815	26.0592	26.7395	26.4788	26.4302	26.6685	26.7271	26.4244	26.463	26.1354	26.1132	26.4202	26.1881	26.1949	26.6496	26.7804	26.6246	26.5517	27.086	26.3599	26.1963	26.6599	26.7068	27.3385	26.1629	26.5502	26.8608	27.4879	26.2448	26.9848	27.0566	26.399	26.5735	26.6024	25.8015	27.69
P63151	2ABA_HUMAN	Serine/threonine-protein phosphatase 2A 55 kDa regulatory subunit B alpha isoform (PP2A subunit B isoform B55-alpha) (PP2A subunit B isoform PR55-alpha) (PP2A subunit B isoform R2-alpha) (PP2A subunit B isoform alpha)	PPP2R2A	4	25.1321	25.4574	25.2609	24.5343	24.7822	25.4309	24.9922	25.475	25.6479	25.1676	25.1268	24.8908	24.4292	24.981	25.2636	24.9804	25.6662	24.5711	25.4817	24.9378	24.9436	25.0981	25.4116	24.7496	25.0085	25.2005	25.6054	24.7157	24.4592	24.6128	24.7224	25.1846	25.5723	25.6816	25.4141	25.7913	25.8589	24.4753	26.0192	25.7814	24.8937	25.7894	25.5311	24.7124	24.7382
Q00005	2ABB_HUMAN	Serine/threonine-protein phosphatase 2A 55 kDa regulatory subunit B beta isoform (PP2A subunit B isoform B55-beta) (PP2A subunit B isoform PR55-beta) (PP2A subunit B isoform R2-beta) (PP2A subunit B isoform beta)	PPP2R2B	2	24.3658	24.4203	24.2168	23.3298	24.0256	24.2894	23.7476	24.7543	24.4205	24.2523	24.5019	23.823	23.459	24.3077	24.1922	24.0635	24.6299	23.2567	24.7038	23.2185	23.8761	23.9184	23.8424	23.7275	24.1671	24.1507	24.655	23.9211	23.4471	23.5437	23.4645	24.3237	24.6687	24.556	24.2187	24.6882	24.7408	24.1087	25.2399	24.925	24.017	25.3966	24.9555	23.6154	24.4931
Q66LE6	2ABD_HUMAN	Serine/threonine-protein phosphatase 2A 55 kDa regulatory subunit B delta isoform (PP2A subunit B isoform B55-delta) (PP2A subunit B isoform PR55-delta) (PP2A subunit B isoform R2-delta) (PP2A subunit B isoform delta)	PPP2R2D KIAA1541	3	24.8263	24.8953	24.7046	23.7635	24.2207	24.6832	24.2594	25.0032	24.8224	24.7144	24.6985	24.178	23.6908	24.5256	24.6494	24.4342	25.0804	23.8589	25.0345	23.9319	24.2192	24.4011	24.3914	24.1127	24.4795	24.4602	24.9793	24.0409	23.7347	23.9142	24.129	24.673	24.9876	25.1345	24.5257	25.0999	25.2434	24.2276	25.6247	25.3222	24.4086	25.5826	25.1806	23.8623	24.7024
P31937	3HIDH_HUMAN	3-hydroxyisobutyrate dehydrogenase, mitochondrial (HIBADH) (EC 1.1.1.31)	HIBADH	13	30.3377	32.044	31.9911	29.9448	30.491	31.5653	31.9928	29.6817	29.6826	32.1936	31.1655	31.2661	30.7457	30.2648	30.426	31.6877	29.4782	31.6744	29.4544	29.7978	29.9073	29.8536	29.5826	31.0034	30.2765	29.7977	28.9532	30.9279	31.1558	30.1738	31.1791	31.0978	31.958	28.6655	31.5617	29.0197	31.3916	31.9801	30.9756	31.1293	30.6727	29.6732	30.8287	30.3392	32.4316
P11171	41_HUMAN	Protein 4.1 (P4.1) (4.1R) (Band 4.1) (EPB4.1) (Erythrocyte membrane protein band 4.1)	EPB41 E41P	22	27.7394	29.8743	27.3996	26.9031	27.4714	27.4603	27.3671	26.552	27.1726	28.1288	27.3137	26.6987	27.0581	27.0521	26.6521	26.6795	26.3098	26.7881	26.5867	26.6793	26.5568	26.2454	26.4486	27.026	26.8089	26.5883	26.2631	27.9089	28.9489	27.1751	27.2332	27.3421	27.6451	27.0089	27.6621	27.325	27.378	27.6499	26.9915	27.1838	27.3905	26.5482	26.8384	28.1065	28.9767
Q13542	4EBP2_HUMAN	Eukaryotic translation initiation factor 4E-binding protein 2 (4E-BP2) (eIF4E-binding protein 2)	EIF4EBP2	2	24.8655	24.5584	24.813	22.3989	24.0048	24.4125	23.9845	22.9356	21.868	24.5853	25.6498	24.1388	23.2391	24.0726	24.4014	23.8031	22.9086	23.8804	22.664	22.5312	22.2742	22.8186	22.2544	23.243	24.7633	23.8842	22.61	24.2304	21.881	22.1219	24.052	24.3341	24.3758	21.6714	23.3598	23.628	24.5672	22.3933	24.568	24.7955	23.0615	23.7967	24.3168	21.7215	5.20668
Q9NRA8	4ET_HUMAN	Eukaryotic translation initiation factor 4E transporter (4E-T) (eIF4E transporter) (Eukaryotic translation initiation factor 4E nuclear import factor 1)	EIF4ENIF1	2	20.1341	21.2454	20.2304	21.1811	22.5471	21.9975	21.4276	21.3735	21.2429	21.362	21.5816	22.2261	21.1478	22.1265	21.3496	19.5794	21.9729	20.0865	21.7538	21.8274	22.5235	21.8775	21.394	20.3927	21.3571	22.7038	21.9931	22.3622	22.7519	21.6212	20.8484	21.8262	19.2507	21.1911	21.4209	21.8423	22.1336	20.1034	21.9085	21.508	21.1443	22.3456	20.951	19.9003	19.3235
P08195	4F2_HUMAN	4F2 cell-surface antigen heavy chain (4F2hc) (4F2 heavy chain antigen) (Lymphocyte activation antigen 4F2 large subunit) (Solute carrier family 3 member 2) (CD antigen CD98)	SLC3A2 MDU1	29	33.9473	34.182	33.2775	33.359	32.8782	34.1634	33.9897	33.1628	33.8828	34.1451	33.299	33.9663	33.7535	34.3725	33.8794	33.1619	32.825	34.1449	32.5868	33.234	33.1919	33.3195	33.1545	33.9079	33.2518	33.0141	32.9149	34.5438	33.5119	32.9208	34.3761	34.5126	33.8665	33.2435	33.5573	34.2327	33.9636	33.8748	33.8005	34.3614	33.8966	33.93	33.8004	32.9115	35.3097
Q9H0P0	5NT3A_HUMAN	Cytosolic 5'-nucleotidase 3A (EC 3.1.3.5) (7-methylguanosine phosphate-specific 5'-nucleotidase) (7-methylguanosine nucleotidase) (EC 3.1.3.91) (Cytosolic 5'-nucleotidase 3) (Cytosolic 5'-nucleotidase III) (cN-III) (Pyrimidine 5'-nucleotidase 1) (P5'N-1) (P5N-1) (PN-I) (Uridine 5'-monophosphate hydrolase 1) (p36)	NT5C3A NT5C3 P5N1 UMPH1 HSPC233	6	24.7201	25.325	25.2343	25.3711	24.8905	25.3978	25.6467	24.5158	25.533	25.3197	24.8683	24.9966	25.3637	25.5517	24.8686	25.2804	24.9329	25.1006	24.926	24.8377	24.9739	24.275	24.5246	25.5665	25.163	24.9681	24.1105	25.2098	25.7185	24.7523	24.8213	24.7948	25.7436	25.201	25.628	24.6945	25.483	25.438	25.4004	24.9086	24.9912	24.6658	24.6785	25.5649	26.0829
P49902	5NTC_HUMAN	Cytosolic purine 5'-nucleotidase (EC 3.1.3.5) (Cytosolic 5'-nucleotidase II)	NT5C2 NT5B NT5CP PNT5	3	23.6152	24.469	23.6956	22.9561	23.2589	23.9538	23.4587	22.5656	22.4118	23.685	23.3987	23.5406	22.934	23.3684	23.6955	22.7519	24.2259	23.17	24.2	23.328	23.6976	23.11	23.2901	23.4531	23.5088	23.8657	23.5977	23.1573	21.7796	22.0146	23.5294	23.7761	23.9032	24.3921	22.8399	24.6824	24.7858	22.3157	24.39	24.1475	22.9049	23.7628	23.4569	22.4652	21.8978
P21589	5NTD_HUMAN	5'-nucleotidase (5'-NT) (EC 3.1.3.5) (Ecto-5'-nucleotidase) (CD antigen CD73)	NT5E NT5 NTE	11	26.5367	24.1115	23.6756	24.4664	22.5371	24.0403	23.701	24.8297	23.9818	23.3659	22.5258	24.403	24.8444	25.3935	23.7709	23.0239	23.9604	23.9804	25.3955	24.502	23.8653	22.3337	23.8609	24.2061	23.1036	24.0684	24.5037	24.1945	24.8875	23.0069	24.2749	24.5288	24.6544	27.4326	25.6922	25.2372	25.8499	24.279	27.1996	23.5968	24.5493	22.9494	23.6269	25.9467	24.821
P52209	6PGD_HUMAN	6-phosphogluconate dehydrogenase, decarboxylating (EC 1.1.1.44)	PGD PGDH	19	29.5878	30.3725	29.7448	28.6339	28.4984	29.9093	29.4757	28.7578	29.1353	29.6087	29.2335	29.5102	29.074	29.1832	29.6755	29.1937	28.6364	29.4034	28.4806	28.7183	28.7164	28.5221	28.7345	29.1559	29.2645	29.0988	28.7653	30.2432	28.189	28.2117	29.8537	29.6209	30.1425	28.921	29.1694	29.7615	30.2421	28.7633	30.2315	30.4855	28.7932	29.1083	29.7939	28.4977	30.2312
O95336	6PGL_HUMAN	6-phosphogluconolactonase (6PGL) (EC 3.1.1.31)	PGLS	9	26.9692	27.0195	26.3103	25.8256	25.0271	26.8356	26.1958	25.4192	28.8625	26.1664	26.1149	26.7834	26.4851	26.4598	26.6063	26.8107	25.5522	26.3689	25.5603	25.7434	25.1998	26.0663	25.783	25.7047	25.7532	25.4232	26.2312	26.9143	25.285	24.987	26.5228	26.6869	26.5541	26.1512	26.3716	26.8201	26.9355	25.9373	26.9597	26.9258	25.6056	26.5888	26.6527	25.6001	26.9773
Q8IZ83	A16A1_HUMAN	Aldehyde dehydrogenase family 16 member A1	ALDH16A1	6	25.4771	24.4176	24.291	24.2878	23.195	24.7295	24.7412	24.2264	23.8208	24.7883	24.4637	24.534	24.2926	24.6892	24.8291	23.7332	23.9993	24.0636	24.0678	24.0273	23.9597	23.9294	24.0326	24.2251	23.9324	24.3165	24.0679	25.3325	23.7554	24.3689	24.5218	24.6643	24.6668	24.784	24.5298	25.0791	25.4602	23.5396	25.5196	25.5142	24.3101	24.4403	24.4762	23.9696	24.5035
P02763	A1AG1_HUMAN	Alpha-1-acid glycoprotein 1 (AGP 1) (Orosomucoid-1) (OMD 1)	ORM1 AGP1	6	27.3335	25.6304	27.1187	25.0538	24.3873	26.8889	26.4147	27.9436	25.3577	26.2929	25.8812	25.2755	25.4997	24.2788	25.1942	26.8169	24.6284	25.9714	24.8968	24.829	23.8922	25.6731	25.7739	26.2445	25.2635	24.4351	24.1841	24.1235	26.8754	24.4934	26.0265	25.2465	26.929	28.4111	27.0891	28.875	27.1291	27.2935	27.0384	27.1998	27.0062	25.6099	27.2733	25.2222	27.676
P19652	A1AG2_HUMAN	Alpha-1-acid glycoprotein 2 (AGP 2) (Orosomucoid-2) (OMD 2)	ORM2 AGP2	2	25.2405	23.8775	24.9413	23.39	23.0603	24.4716	24.3916	25.1589	23.646	24.1747	23.9555	23.4807	24.0263	23.0935	23.5127	24.5624	23.0431	24.2385	23.3571	23.0793	22.5851	23.5349	23.4422	24.3075	23.4451	22.932	23.1947	23.364	24.7325	22.6496	24.0283	23.35	24.746	26.0536	24.5444	26.2762	24.4246	25.2624	24.582	25.0102	24.7906	23.1822	24.5455	23.7848	27.2027
P01009	A1AT_HUMAN	Alpha-1-antitrypsin (Alpha-1 protease inhibitor) (Alpha-1-antiproteinase) (Serpin A1) [Cleaved into: Short peptide from AAT (SPAAT)]	SERPINA1 AAT PI PRO0684 PRO2209	14	27.9856	28.1536	28.3717	27.0226	25.8425	28.5538	28.2889	28.3144	27.3324	28.0198	26.7058	27.3265	28.3454	27.2569	27.5782	28.3746	27.6203	28.4855	26.9374	27.5576	26.8176	27.1788	26.9997	28.4845	27.5105	27.028	26.9416	27.4713	28.8771	26.8249	27.9755	27.5802	28.1481	29.449	28.2625	29.2822	28.5342	28.7783	28.5969	28.5757	28.4165	27.4375	28.0433	27.5481	30.2616
P04217	A1BG_HUMAN	Alpha-1B-glycoprotein (Alpha-1-B glycoprotein)	A1BG	6	26.0186	25.9101	24.6626	24.9528	24.7871	25.2138	24.1586	25.3004	25.5621	24.5705	24.0362	24.9993	26.5924	25.6596	24.7835	25.7726	25.1974	26.1278	25.8996	26.4417	24.9589	25.6186	25.7449	26.2161	24.722	24.6692	25.8213	24.4548	27.2138	26.5761	25.3031	25.1267	23.4642	27.5128	26.3899	26.188	25.1367	26.4967	26.5522	24.4917	24.6778	25.4284	24.7257	26.9328	26.2897
P08697	A2AP_HUMAN	Alpha-2-antiplasmin (Alpha-2-AP) (Alpha-2-plasmin inhibitor) (Alpha-2-PI) (Serpin F2)	SERPINF2 AAP PLI	2	20.1272	20.7268	21.0365	20.9512	18.7532	20.1342	19.401	19.6775	18.524	19.6186	18.2416	21.1088	21.1736	20.0924	22.5407	22.1112	21.7971	22.1045	21.1162	21.1872	21.9914	22.7864	20.8873	21.2414	20.9541	21.909	22.0878	21.4644	21.5691	21.5963	18.7355	22.295	19.9059	22.3319	20.0149	22.5962	21.3352	19.8559	18.7307	20.3655	20.3532	20.0975	19.9809	20.9669	22.0705
P01023	A2MG_HUMAN	Alpha-2-macroglobulin (Alpha-2-M) (C3 and PZP-like alpha-2-macroglobulin domain-containing protein 5)	A2M CPAMD5 FWP007	37	26.6602	26.9042	27.0662	27.0322	26.6327	27.2105	26.9296	28.0194	28.8239	27.4524	26.3176	26.8337	27.6603	27.1344	28.5013	28.8531	28.8781	26.9509	27.389	28.113	29.4768	29.2687	29.5802	30.2113	27.3799	27.5145	28.7163	27.1929	29.6606	26.955	27.5492	26.8313	28.6208	28.1742	28.4187	29.4362	28.3553	27.1181	27.1898	28.5945	26.4002	27.859	27.7574	27.261	30.1196
P05067	A4_HUMAN	Amyloid-beta precursor protein (APP) (ABPP) (APPI) (Alzheimer disease amyloid protein) (Amyloid precursor protein) (Amyloid-beta A4 protein) (Cerebral vascular amyloid peptide) (CVAP) (PreA4) (Protease nexin-II) (PN-II) [Cleaved into: N-APP; Soluble APP-alpha (S-APP-alpha); Soluble APP-beta (S-APP-beta); C99 (Beta-secretase C-terminal fragment) (Beta-CTF); Amyloid-beta protein 42 (Abeta42) (Beta-…	APP A4 AD1	19	27.7924	28.3668	28.3401	28.2824	27.9318	28.6099	28.5949	28.6104	29.2501	28.4911	28.3804	28.6593	28.5568	28.2101	28.5896	28.9648	28.3238	28.9427	28.4023	28.7442	28.3909	28.5991	28.7997	28.5738	28.4875	28.6857	28.9311	29.053	28.7528	28.6492	28.485	28.5918	28.9775	28.6085	28.5667	28.1393	28.3761	28.6919	27.6006	28.0851	28.068	28.016	28.5257	29.0485	29.5296
Q9NS82	AAA1_HUMAN	Asc-type amino acid transporter 1 (Asc-1) (Solute carrier family 7 member 10)	SLC7A10 ASC1	2	26.4356	26.8116	25.6593	26.1852	25.653	26.5267	26.6161	25.1762	25.7755	26.5719	25.4733	26.5839	26.5062	26.9731	26.4266	25.5564	25.5809	27.0069	25.2565	25.8528	25.9666	25.6662	25.7845	26.8287	25.6222	25.1954	25.3166	27.3427	25.9955	24.6073	27.044	26.9069	26.1986	25.139	25.487	26.5368	26.0781	27.0626	25.9542	26.682	26.5082	25.9717	26.1868	25.4985	28.9316
Q9NRG9	AAAS_HUMAN	Aladin (Adracalin)	AAAS ADRACALA GL003	8	25.3453	25.323	25.7706	26.2154	25.5686	25.9588	26.3761	26.8126	26.754	25.8763	25.4132	25.6866	25.9825	25.8379	26.1057	26.3261	26.1711	26.0409	25.7868	26.0867	26.289	26.3516	26.2238	25.8479	25.9977	26.4212	26.6164	25.8685	26.0675	26.2774	25.8287	25.7352	26.6145	26.0883	26.1963	25.6915	25.8	25.6976	25.2985	26.1829	25.7773	26.0881	25.9959	26.1443	26.2611
Q15758	AAAT_HUMAN	Neutral amino acid transporter B(0) (ATB(0)) (Baboon M7 virus receptor) (RD114/simian type D retrovirus receptor) (Sodium-dependent neutral amino acid transporter type 2) (Solute carrier family 1 member 5)	SLC1A5 ASCT2 M7V1 RDR RDRC	2	20.5663	18.6155	20.4701	21.1797	18.4973	17.0844	18.1906	17.7208	21.841	16.5745	16.5832	18.8957	19.418	19.8677	20.1963	1.05081	20.847	19.481	19.6938	20.8324	18.8217	17.0085	18.3624	18.7955	20.6335	0.698516	15.8253	18.4674	20.6648	1.93685	18.3449	19.2842	17.7031	23.7903	18.4907	21.0261	19.7571	19.1046	22.4528	15.5413	18.36	18.8246	16.7665	18.3156	18.6951
Q86V21	AACS_HUMAN	Acetoacetyl-CoA synthetase (EC 6.2.1.16) (Acyl-CoA synthetase family member 1) (Protein sur-5 homolog)	AACS ACSF1	2	19.1394	22.8087	22.0447	23.3233	23.4663	22.4975	23.6202	24.4622	24.2155	22.9047	22.3693	21.9542	19.2109	19.7678	22.4552	19.4612	23.1849	21.3509	23.3272	23.5234	23.1273	23.4542	22.7515	21.8976	21.8422	23.6291	24.0176	22.9596	20.2403	23.4308	21.3382	21.8632	23.7901	22.7799	23.4327	22.9651	23.4382	19.9335	21.3948	22.9984	22.8253	23.6258	22.4099	20.3658	16.4369
P01011	AACT_HUMAN	Alpha-1-antichymotrypsin (ACT) (Cell growth-inhibiting gene 24/25 protein) (Serpin A3) [Cleaved into: Alpha-1-antichymotrypsin His-Pro-less]	SERPINA3 AACT GIG24 GIG25	9	25.041	25.319	25.3396	28.0574	24.046	25.3248	25.18	25.5184	27.197	26.0456	24.9602	26.2487	26.3426	25.0016	27.2734	27.3307	25.8862	26.8979	26.8268	26.6441	26.5273	27.8224	26.8429	26.5969	25.3406	25.3313	25.4694	24.8131	26.3316	26.8238	25.8617	25.6899	25.3219	27.8816	25.7234	27.603	25.2224	27.4071	25.1136	24.3893	25.2017	25.5879	25.1647	25.0959	29.3108
Q8N5Z0	AADAT_HUMAN	Kynurenine/alpha-aminoadipate aminotransferase, mitochondrial (KAT/AadAT) (2-aminoadipate aminotransferase) (2-aminoadipate transaminase) (EC 2.6.1.39) (Alpha-aminoadipate aminotransferase) (AadAT) (Kynurenine aminotransferase II) (Kynurenine--oxoglutarate aminotransferase II) (Kynurenine--oxoglutarate transaminase 2) (EC 2.6.1.7) (Kynurenine--oxoglutarate transaminase II)	AADAT KAT2 KYAT2	8	23.7219	25.4509	25.7514	23.4052	24.6473	25.8498	25.8088	23.9976	23.0807	25.6985	24.7103	25.1894	23.4916	23.064	23.5541	24.9604	22.8602	24.7466	22.4706	22.7389	23.8693	23.3912	22.9603	24.5136	22.7846	23.8174	22.1589	23.8619	23.9293	22.7674	24.2607	24.5572	26.1598	24.4491	25.1924	23.304	24.8207	23.8717	24.7395	24.3292	24.5592	23.2886	25.3182	22.3436	23.7126
Q6PD74	AAGAB_HUMAN	Alpha- and gamma-adaptin-binding protein p34	AAGAB	2	20.1076	21.44	20.7422	21.6135	23.6006	21.0297	22.2802	23.4108	22.2324	20.8643	22.5994	20.5008	18.7916	20.5279	21.0495	19.8847	22.4705	20.141	22.8057	22.4352	22.8229	22.7451	22.824	20.1671	22.2282	23.166	23.0616	21.1896	20.5356	23.9338	20.3849	19.6271	21.3183	22.9428	21.8491	22.1591	21.8566	20.9283	21.2881	22.0003	21.4701	23.5731	21.5976	18.5438	22.3277
Q2M2I8	AAK1_HUMAN	AP2-associated protein kinase 1 (EC 2.7.11.1) (Adaptor-associated kinase 1)	AAK1 KIAA1048	2	24.2653	26.0033	24.9176	24.3569	24.7243	25.6373	24.6336	24.5314	23.6349	25.394	25.1572	25.3195	25.0572	24.4608	25.0602	24.3698	25.2026	25.0613	24.767	24.6493	24.6881	25.3839	24.519	24.5239	24.3561	24.9365	25.611	25.6692	24.0362	24.7275	25.4772	25.2687	25.5346	24.3023	24.533	25.1945	26.1094	24.1142	24.6789	24.7957	24.0346	24.3939	24.4069	24.6428	23.3
Q9Y478	AAKB1_HUMAN	5'-AMP-activated protein kinase subunit beta-1 (AMPK subunit beta-1) (AMPKb)	PRKAB1 AMPK	5	24.1561	24.6723	24.7454	24.0791	24.9022	24.8315	23.7797	24.9406	24.6743	24.64	24.1099	24.3673	23.9963	24.2206	24.9138	24.4455	25.3755	24.6623	25.303	24.9781	25.2525	25.4909	25.2271	24.257	25.0155	26.0732	25.6156	24.3561	24.5322	25.5046	24.6218	24.1223	24.8927	25.1647	23.914	25.2758	24.577	23.5301	24.5177	23.6034	24.3386	25.2373	24.5093	24.7587	24.5638
P54619	AAKG1_HUMAN	5'-AMP-activated protein kinase subunit gamma-1 (AMPK gamma1) (AMPK subunit gamma-1) (AMPKg)	PRKAG1	9	25.4945	25.0387	25.0201	25.2528	25.0806	25.409	25.1532	26.3889	27.0304	24.8223	24.7447	25.2461	25.4357	25.0346	25.3787	25.6351	25.9815	25.4783	25.6757	26.0512	25.4989	26.7909	25.9395	25.0761	25.4843	26.1076	26.78	25.5994	25.3587	26.1437	25.1617	24.95	25.1988	25.4032	25.6394	26.1571	25.0347	25.1274	25.235	25.1509	24.753	26.2792	25.3399	25.3913	26.5733
Q9UGJ0	AAKG2_HUMAN	5'-AMP-activated protein kinase subunit gamma-2 (AMPK gamma2) (AMPK subunit gamma-2) (H91620p)	PRKAG2	1	24.4946	24.0277	23.7351	23.9543	23.8235	24.2159	24.1307	25.0897	26.2887	23.8139	23.2473	24.0985	24.1441	23.6548	24.0056	24.7532	24.4013	24.2692	23.9429	24.6681	23.6051	25.4369	24.6655	23.9547	24.1222	24.8755	25.4413	24.726	24.2991	24.6457	23.7497	23.7063	24.3166	23.4569	24.7535	24.8777	23.7723	24.1617	24.1418	23.9521	23.4906	25.095	24.1627	24.3495	24.8224
Q13131	AAPK1_HUMAN	5'-AMP-activated protein kinase catalytic subunit alpha-1 (AMPK subunit alpha-1) (EC 2.7.11.1) (Acetyl-CoA carboxylase kinase) (ACACA kinase) (EC 2.7.11.27) (Hydroxymethylglutaryl-CoA reductase kinase) (HMGCR kinase) (EC 2.7.11.31) (Tau-protein kinase PRKAA1) (EC 2.7.11.26)	PRKAA1 AMPK1	11	26.55	27.0698	26.7247	26.394	27.0187	27.0172	26.8414	27.5411	27.2902	26.7095	26.7	26.7165	26.6847	26.4602	27.0257	26.8471	27.6265	26.9722	27.4284	27.2956	27.2192	27.5006	27.1272	26.7848	27.0124	27.4661	27.7183	27.2929	26.5387	27.3354	26.9867	26.8397	27.3984	26.933	26.7152	27.436	26.9349	26.4198	26.7375	26.9004	26.4497	27.4382	26.6907	26.4247	27.3685
P54646	AAPK2_HUMAN	5'-AMP-activated protein kinase catalytic subunit alpha-2 (AMPK subunit alpha-2) (EC 2.7.11.1) (Acetyl-CoA carboxylase kinase) (ACACA kinase) (EC 2.7.11.27) (Hydroxymethylglutaryl-CoA reductase kinase) (HMGCR kinase) (EC 2.7.11.31)	PRKAA2 AMPK AMPK2	2	23.9124	24.6766	24.3712	23.9968	24.9822	24.8469	24.1953	25.5673	24.998	24.0566	24.5528	24.3553	24.311	24.4019	24.507	23.9251	25.4098	24.3855	25.0596	25.0084	24.8139	25.2452	24.7753	24.249	24.7232	25.4263	25.4855	25.0273	23.9058	25.0684	24.393	24.6299	25.1236	24.5037	24.3964	25.3159	24.8074	23.9463	24.4074	24.4991	24.2272	25.1423	24.3797	23.465	24.157
Q9Y312	AAR2_HUMAN	Protein AAR2 homolog (AAR2 splicing factor homolog)	AAR2 C20orf4 CGI-23 PRO0225	1	18.2479	-0.13944	17.3381	16.7279	0.553025	18.4962	18.2945	17.2018	19.0048	18.1276	18.096	20.0074	19.0303	18.405	17.022	19.4179	19.8734	17.9741	-0.367156	-0.0626378	18.5028	19.696	-0.392884	-0.0440208	19.7852	18.6727	19.9548	0.267996	18.8684	16.8916	16.7575	-0.320662	19.6542	20.0761	18.7834	19.4468	-0.637834	19.6467	18.4713	18.217	16.4612	20.3511	18.6231	17.6339	4.20668
Q9BTE6	AASD1_HUMAN	Alanyl-tRNA editing protein Aarsd1 (Alanyl-tRNA synthetase domain-containing protein 1)	AARSD1	5	23.6258	23.2715	23.0592	24.5652	24.643	22.9729	24.0535	24.5782	25.0535	23.5239	22.784	23.2668	23.9114	24.18	23.2706	22.8892	24.9902	22.63	24.8958	25.0333	24.5873	24.8425	24.8623	23.0321	24.146	24.7615	25.2492	23.5319	24.1664	25.2416	22.7828	22.5774	22.696	24.9721	23.8802	24.6084	23.8967	23.7584	23.2452	23.2704	23.8513	25.118	24.1819	22.9023	27.333
Q9UDR5	AASS_HUMAN	Alpha-aminoadipic semialdehyde synthase, mitochondrial (LKR/SDH) [Includes: Lysine ketoglutarate reductase (LKR) (LOR) (EC 1.5.1.8); Saccharopine dehydrogenase (SDH) (EC 1.5.1.9)]	AASS	23	27.9282	28.9911	29.102	27.4373	27.7649	29.0042	29.1533	27.4928	27.846	29.5285	28.1782	28.7104	27.9606	28.0692	28.0755	28.7677	27.5831	28.5046	26.8473	27.3145	27.653	27.4051	27.3056	28.7388	27.7396	27.8211	27.1486	28.2046	28.1593	27.353	28.3803	28.4564	29.4673	26.2001	28.955	27.3169	28.9031	28.3068	28.7508	28.6544	27.7626	27.6245	28.2498	27.8096	29.5405
P17174	AATC_HUMAN	Aspartate aminotransferase, cytoplasmic (cAspAT) (EC 2.6.1.1) (EC 2.6.1.3) (Cysteine aminotransferase, cytoplasmic) (Cysteine transaminase, cytoplasmic) (cCAT) (Glutamate oxaloacetate transaminase 1) (Transaminase A)	GOT1	17	28.1638	29.2171	28.5936	27.7844	27.4318	28.712	28.3317	27.9169	27.6633	28.5598	28.3975	28.6858	27.6701	28.3214	28.8628	28.3887	27.6629	28.3363	27.7239	27.737	27.9023	27.6009	27.8685	28.2017	28.4289	28.3402	27.545	28.9262	27.3819	27.0662	28.8388	29.08	29.0564	27.7768	28.1186	28.536	28.8968	27.5292	29.0458	29.1491	27.7858	28.0152	28.7727	27.6176	28.8377
P00505	AATM_HUMAN	Aspartate aminotransferase, mitochondrial (mAspAT) (EC 2.6.1.1) (EC 2.6.1.7) (Fatty acid-binding protein) (FABP-1) (Glutamate oxaloacetate transaminase 2) (Kynurenine aminotransferase 4) (Kynurenine aminotransferase IV) (Kynurenine--oxoglutarate transaminase 4) (Kynurenine--oxoglutarate transaminase IV) (Plasma membrane-associated fatty acid-binding protein) (FABPpm) (Transaminase A)	GOT2 KYAT4	30	33.6094	35.4855	34.7751	33.5775	33.8649	34.6274	34.901	32.749	33.5424	35.169	33.9378	34.31	33.5163	33.4386	33.3284	34.7221	32.4277	34.5962	32.2295	32.6668	33.4087	32.4021	32.6928	34.0707	33.2454	33.1718	32.0639	34.1105	33.5122	32.7268	34.7175	34.3853	35.1883	31.397	34.8161	32.5363	33.9198	34.4972	34.5282	34.2857	33.6501	33.2741	33.902	33.9055	35.2129
Q5VST6	AB17B_HUMAN	Alpha/beta hydrolase domain-containing protein 17B (Abhydrolase domain-containing protein 17B) (EC 3.1.2.22)	ABHD17B C9orf77 FAM108B1 CGI-67	5	23.9819	23.1966	23.6182	24.2527	22.8559	24.586	24.2916	23.8824	24.9234	23.4087	23.1139	23.3333	24.3661	23.8982	23.8089	23.7881	23.3247	23.3844	23.6748	24.038	23.5433	24.2566	23.2494	23.4726	23.5938	23.6572	24.5998	23.807	23.7987	24.2003	23.5375	24.0498	24.1553	24.4287	24.2237	23.8783	24.1115	24.0756	23.7381	24.2745	24.0651	23.3032	24.149	23.2876	23.8398
Q7Z5R6	AB1IP_HUMAN	Amyloid beta A4 precursor protein-binding family B member 1-interacting protein (APBB1-interacting protein 1) (Proline-rich EVH1 ligand 1) (PREL-1) (Proline-rich protein 73) (Rap1-GTP-interacting adapter molecule) (RIAM) (Retinoic acid-responsive proline-rich protein 1) (RARP-1)	APBB1IP PREL1 RARP1 RIAM	2	20.4473	20.9945	21.9936	22.5684	20.0547	21.0914	21.266	19.4586	21.4946	20.9908	19.8323	21.1851	21.9683	19.7719	22.1521	21.0833	21.8796	21.0715	22.3454	21.1188	22.0458	17.901	20.8258	20.8207	19.0032	19.2955	21.3488	21.438	18.8109	20.2529	20.308	19.7923	22.482	23.7225	18.9166	20.2356	19.7043	18.6001	19.3288	0.460173	20.2773	1.07763	20.2032	21.0378	23.3346
O95477	ABCA1_HUMAN	Phospholipid-transporting ATPase ABCA1 (EC 7.6.2.1) (ATP-binding cassette sub-family A member 1) (ATP-binding cassette transporter 1) (ABC-1) (ATP-binding cassette 1) (Cholesterol efflux regulatory protein)	ABCA1 ABC1 CERP	6	24.4451	24.4356	24.0015	23.7727	22.8078	24.6333	24.4174	23.8602	26.1852	24.2048	23.0712	24.2581	24.1117	23.3414	24.2367	25.2527	23.576	24.4165	23.5042	23.5068	23.7531	23.8928	23.8372	23.7962	23.7049	23.8858	23.7431	24.3658	23.6496	24.1282	23.9922	23.7559	24.5955	24.2696	24.8185	23.2381	23.9677	23.6505	23.6797	23.9555	23.7584	24.0635	24.5962	24.0029	25.8154
Q9BZC7	ABCA2_HUMAN	ATP-binding cassette sub-family A member 2 (EC 7.6.2.-) (ATP-binding cassette transporter 2) (ATP-binding cassette 2)	ABCA2 ABC2 KIAA1062	46	29.4792	30.0666	30.114	29.0723	29.1234	30.9262	30.354	29.6312	30.5328	29.7414	29.3438	30.3452	30.2301	29.446	29.9803	30.2727	29.8942	29.696	28.821	29.3072	30.3326	30.4422	30.1306	29.8203	29.8203	30.0024	29.9151	30.4359	29.8633	29.5983	29.9851	30.1831	29.9474	29.1947	29.516	29.279	29.5747	29.3033	29.3133	29.4505	29.6727	28.8883	30.835	29.944	30.4456
P78363	ABCA4_HUMAN	Retinal-specific phospholipid-transporting ATPase ABCA4 (EC 7.6.2.1) (ATP-binding cassette sub-family A member 4) (RIM ABC transporter) (RIM protein) (RmP) (Retinal-specific ATP-binding cassette transporter) (Stargardt disease protein)	ABCA4 ABCR	82	31.1995	31.6932	31.3432	31.442	30.7963	31.6438	31.5839	31.9334	32.1139	31.3998	30.9583	31.1508	31.604	31.3281	31.0298	31.4361	30.8552	31.2769	31.6247	31.2946	31.1206	31.1811	30.7305	31.4389	31.107	31.3879	31.3515	31.291	31.6413	31.0008	31.4469	31.6609	31.8356	32.4894	32.1958	31.4954	31.7472	31.9404	31.0824	31.618	31.1624	31.3394	31.5361	31.9415	33.2358
Q8WWZ7	ABCA5_HUMAN	Cholesterol transporter ABCA5 (EC 7.6.2.-) (ATP-binding cassette sub-family A member 5)	ABCA5 KIAA1888	12	24.3958	25.8697	25.0441	24.7533	24.4656	25.3143	25.5967	25.3416	25.1084	25.5256	24.7058	24.8975	25.3112	25.8024	25.3371	24.8917	24.196	25.6559	25.0495	24.7257	25.2295	24.4329	24.6462	24.9835	24.4067	24.8163	24.7415	25.8919	24.739	24.8138	25.8556	25.9884	25.959	24.1752	25.0256	25.3178	25.3235	25.5044	25.3176	25.6624	25.2038	24.9995	25.1289	24.9034	26.0082
Q8IZY2	ABCA7_HUMAN	Phospholipid-transporting ATPase ABCA7 (EC 7.6.2.1) (ABCA-SSN) (ATP-binding cassette sub-family A member 7) (Autoantigen SS-N) (Macrophage ABC transporter)	ABCA7	18	26.4286	26.9342	26.1506	26.0519	25.3091	26.1702	26.6422	26.4945	26.6641	26.5497	25.8198	26.2443	26.6463	26.1536	26.7335	26.5317	26.3704	26.835	25.9103	26.513	26.3131	26.7811	26.3695	26.1987	25.8864	26.204	26.3207	26.5321	26.2483	26.3328	26.2944	26.9494	26.5681	27.3557	26.3495	26.0877	26.4526	26.3416	25.9757	26.699	26.1278	25.8997	26.0717	25.998	26.3714
O94911	ABCA8_HUMAN	ABC-type organic anion transporter ABCA8 (EC 7.6.2.-) (ATP-binding cassette sub-family A member 8)	ABCA8 KIAA0822	7	25.8434	22.7296	22.2441	21.8524	23.469	22.7582	22.4782	22.3769	22.8376	22.8912	22.3702	23.316	22.716	24.05	21.7748	22.4249	22.5861	22.3071	23.2524	23.9034	22.7561	21.943	22.5153	22.6037	21.8225	22.4582	22.621	21.8191	23.7182	22.5603	21.7354	21.7227	22.8446	22.7188	23.1772	24.6789	25.003	23.18	25.1178	21.9757	23.4461	22.2523	22.6256	23.5001	24.6927
Q9NP58	ABCB6_HUMAN	ATP-binding cassette sub-family B member 6, mitochondrial (Mitochondrial ABC transporter 3) (Mt-ABC transporter 3) (P-glycoprotein-related protein) (Ubiquitously-expressed mammalian ABC half transporter)	ABCB6 MTABC3 PRP UMAT	9	26.6697	27.4965	26.7762	27.2226	26.3174	27.2965	27.657	26.6046	28.0793	26.5465	26.558	25.6962	27.2408	27.3815	26.5688	26.8732	26.5941	27.1513	26.5801	27.0006	26.6048	27.2453	27.0813	27.3326	26.9705	26.8021	27.6548	26.9889	27.5401	27.6865	26.6511	26.7744	27.3891	27.6732	26.8263	26.6921	27.2911	27.6763	26.7006	27.0008	27.5739	26.8637	27.2094	26.182	27.7749
O75027	ABCB7_HUMAN	ATP-binding cassette sub-family B member 7, mitochondrial (ATP-binding cassette transporter 7) (ABC transporter 7 protein)	ABCB7 ABC7	16	26.8047	28.1468	28.2006	27.6338	27.4337	28.1526	28.4509	27.1703	27.9278	28.1536	27.3998	27.5177	27.9098	27.5848	27.5161	28.0586	27.3338	28.0521	27.2444	27.3265	27.75	27.3434	27.2415	28.1805	27.4962	27.5309	26.8508	27.4472	28.0207	27.4885	27.3766	27.3214	28.571	27.8127	28.5256	26.7165	28.0646	27.9836	27.3308	27.8371	27.5378	27.3096	27.7475	28.3397	29.1639
Q9NRK6	ABCBA_HUMAN	ATP-binding cassette sub-family B member 10, mitochondrial (ATP-binding cassette transporter 10) (ABC transporter 10 protein) (Mitochondrial ATP-binding cassette 2) (M-ABC2)	ABCB10	7	24.4898	26.0596	26.0273	25.2264	24.9671	26.5495	26.7544	25.2058	26.2043	26.2613	25.0218	25.8637	25.516	25.6111	25.7561	25.8646	25.6199	26.2874	25.1914	25.452	25.618	25.5384	25.1391	26.1435	25.2346	25.7328	24.814	25.4533	25.7181	25.1939	25.3614	25.6066	26.708	26.7116	26.7992	24.8327	26.0909	25.5599	25.4611	25.8079	25.5272	25.0482	25.8363	25.6918	25.6056
Q09428	ABCC8_HUMAN	ATP-binding cassette sub-family C member 8 (Sulfonylurea receptor 1)	ABCC8 HRINS SUR SUR1	1	21.4324	21.1666	21.3935	20.8833	21.353	22.6293	22.1527	23.1306	23.027	22.3512	20.8098	21.7167	21.8189	21.185	21.7357	22.2723	22.0053	21.4372	21.5718	21.7206	22.5465	22.2537	22.0925	21.7486	21.1876	22.0814	21.8957	21.0255	21.8741	22.2884	21.5177	22.2998	23.0876	21.6907	22.6143	21.5994	22.6946	21.1565	20.3366	21.9591	21.4414	21.8571	22.6133	21.1283	4.20668
O60706	ABCC9_HUMAN	ATP-binding cassette sub-family C member 9 (Sulfonylurea receptor 2)	ABCC9 SUR2	15	26.3611	25.6061	25.4231	25.8387	25.8754	26.3789	25.8738	26.7957	27.0987	25.6441	25.6477	26.0693	26.4631	25.6183	25.8369	26.8846	25.9645	25.6635	26.1813	25.9697	26.138	26.5376	26.1474	25.8942	25.6656	25.5204	26.4237	25.7706	26.4026	27.1299	26.0618	26.4043	26.5867	26.2292	26.4907	25.8332	26.1616	26.3769	24.7012	26.3097	25.8961	26.1242	26.6697	25.8944	28.2122
Q96J66	ABCCB_HUMAN	ATP-binding cassette sub-family C member 11 (EC 7.6.2.2) (EC 7.6.2.3) (Multidrug resistance-associated protein 8)	ABCC11 MRP8	2	20.0934	19.1009	18.3214	22.3177	22.9244	20.0434	20.4996	22.6284	18.6507	19.307	21.8951	20.4516	22.7004	22.136	21.9344	21.1265	20.5189	21.863	21.5376	21.4174	22.3728	21.4494	21.3541	21.7266	21.8487	21.7391	22.1205	22.117	22.4458	21.682	23.1261	20.6903	16.1074	19.689	20.321	19.565	19.6767	21.6957	19.9628	17.979	22.3401	20.4798	22.216	23.1181	21.5735
P33897	ABCD1_HUMAN	ATP-binding cassette sub-family D member 1 (EC 7.6.2.4) (Adrenoleukodystrophy protein) (ALDP)	ABCD1 ALD	9	25.4596	27.1531	26.7461	26.0418	26.1209	27.1782	27.4817	26.5363	26.4996	27.0773	26.0419	26.5214	26.3317	26.2297	26.6358	26.4266	26.1066	26.9377	26.1443	25.6129	25.9766	26.1274	26.1871	26.8338	26.2345	26.468	25.8339	26.1138	26.6476	25.7487	26.3886	27.0142	27.6758	26.8656	27.3423	26.0754	26.8523	26.2866	26.489	26.7207	26.3477	25.7364	26.4338	26.4416	28.0007
P28288	ABCD3_HUMAN	ATP-binding cassette sub-family D member 3 (70 kDa peroxisomal membrane protein) (PMP70)	ABCD3 PMP70 PXMP1	39	31.2036	32.9565	33.2052	32.0853	32.2094	33.3195	33.7742	32.9369	33.3467	33.059	32.3015	32.1658	32.0745	32.0262	32.4128	32.9529	32.1105	32.6432	32.1761	32.0418	32.2828	32.4476	32.5465	32.7428	32.557	32.4474	32.188	31.735	32.7429	31.8765	32.6787	32.4341	33.6639	31.6099	33.2261	32.2148	33.5878	32.4597	32.0563	33.0337	32.4946	32.3067	32.8005	32.9616	32.9255
O14678	ABCD4_HUMAN	Lysosomal cobalamin transporter ABCD4 (ATP-binding cassette sub-family D member 4) (PMP70-related protein) (P70R) (Peroxisomal membrane protein 1-like) (PXMP1-L) (Peroxisomal membrane protein 69) (PMP69)	ABCD4 PXMP1L	4	24.0625	25.258	24.6081	24.7341	24.0425	25.0649	24.9955	25.2342	25.0935	24.7132	23.8542	24.7093	23.5735	23.9426	24.394	24.9518	24.2397	24.6382	24.3878	24.3131	23.8321	24.9584	24.2094	24.0871	24.2039	23.8195	23.9565	24.6402	24.2252	24.0438	23.8169	25.003	25.3747	24.7183	24.7406	25.1798	25.5374	24.0068	24.624	25.1301	24.7314	24.0713	24.708	23.8252	24.0263
P61221	ABCE1_HUMAN	ATP-binding cassette sub-family E member 1 (2'-5'-oligoadenylate-binding protein) (HuHP68) (RNase L inhibitor) (Ribonuclease 4 inhibitor) (RNS4I)	ABCE1 RLI RNASEL1 RNASELI RNS4I OK/SW-cl.40	12	25.5872	25.9809	25.7897	25.7151	25.2281	26.0611	25.8752	26.2149	26.7549	25.8966	25.2851	25.8222	25.3864	25.1904	25.8311	25.9203	25.6769	25.4373	25.6571	25.5885	25.5292	26.3019	25.767	25.2677	25.5657	25.9612	26.8677	26.0838	25.0166	26.1759	25.5461	25.3761	26.2625	25.7891	26.0295	26.0166	26.0278	25.4789	25.7864	26.0965	25.3506	25.8982	25.8771	25.3649	26.4585
Q8NE71	ABCF1_HUMAN	ATP-binding cassette sub-family F member 1 (ATP-binding cassette 50) (TNF-alpha-stimulated ABC protein)	ABCF1 ABC50	13	25.2466	25.3064	25.0826	25.2416	24.9571	25.293	24.5219	26.7055	25.1451	25.3737	24.9548	25.2562	25.4991	25.1861	25.6175	25.2663	26.1654	25.2607	25.9536	25.3956	25.4197	26.4324	24.9097	24.5204	25.09	26.0822	27.0582	26.3529	24.4357	25.9079	25.58	25.344	25.6403	25.3674	24.7249	25.9356	25.0727	24.209	25.1	25.3861	24.7483	25.566	25.1531	24.8606	26.5081
Q9UG63	ABCF2_HUMAN	ATP-binding cassette sub-family F member 2 (Iron-inhibited ABC transporter 2)	ABCF2 HUSSY-18	10	24.9776	25.869	25.474	25.8042	26.1273	25.7503	25.7422	26.4618	26.6015	25.635	25.5046	25.6056	25.3104	25.3007	25.7766	25.7159	25.9832	25.5804	26.0958	26.3459	26.0029	26.305	26.1255	25.9433	26.0805	26.3312	26.62	26.388	25.8722	26.0526	25.5639	25.6357	25.8166	25.371	25.6626	25.8072	26.04	25.2657	24.7729	25.4063	25.4986	26.0262	25.3368	26.3728	27.9533
Q9NUQ8	ABCF3_HUMAN	ATP-binding cassette sub-family F member 3	ABCF3	11	25.1281	25.4674	25.2928	26.047	26.3407	25.3286	25.3575	26.6576	27.3598	25.2924	25.7386	25.58	25.2516	25.2255	25.7988	25.7139	26.417	24.9077	26.4933	26.4272	26.5554	26.4681	26.5868	25.9214	26.3396	26.4621	26.4406	26.176	25.9303	26.5591	25.6428	25.2121	25.2943	26.0858	26.2017	26.206	25.8911	25.032	24.988	25.8601	25.0825	26.4043	25.5177	26.3377	27.0453
Q8N2K0	ABD12_HUMAN	Lysophosphatidylserine lipase ABHD12 (EC 3.1.-.-) (2-arachidonoylglycerol hydrolase ABHD12) (Abhydrolase domain-containing protein 12) (hABHD12) (Monoacylglycerol lipase ABHD12) (EC 3.1.1.23) (Oxidized phosphatidylserine lipase ABHD12) (EC 3.1.-.-)	ABHD12 C20orf22	12	27.1429	27.6733	27.7633	27.3228	27.3333	27.7454	28.222	28.2888	27.9539	27.8114	27.1191	27.396	27.161	27.4104	27.7892	27.7345	27.2204	27.5843	27.2921	27.6267	27.6335	27.5989	27.648	27.7242	27.6762	26.9456	27.6283	27.2935	27.712	27.3761	27.5348	27.5975	28.55	29.094	28.0518	27.6908	27.9118	27.3297	27.1401	27.889	27.7337	27.4526	27.9728	27.6547	29.6629
P08910	ABHD2_HUMAN	Monoacylglycerol lipase ABHD2 (EC 3.1.1.23) (2-arachidonoylglycerol hydrolase) (Abhydrolase domain-containing protein 2) (Acetylesterase) (EC 3.1.1.6) (Lung alpha/beta hydrolase 2) (Progesterone-sensitive lipase) (EC 3.1.1.79) (Protein PHPS1-2)	ABHD2 LABH2	7	24.3777	24.4922	24.5535	25.8735	25.5892	24.8989	25.6552	25.9516	26.9158	25.1243	25.1985	24.9737	24.7275	25.0979	24.874	25.4576	24.867	25.6336	25.3398	25.0596	25.4857	25.1539	24.4545	25.3843	25.3808	25.0394	25.6074	25.7222	25.5284	24.9031	25.1075	24.9329	25.642	25.3397	25.2644	26.2186	26.2145	25.2198	24.8496	25.1293	25.8258	25.8137	24.9573	25.7761	27.0197
Q8WU67	ABHD3_HUMAN	Phospholipase ABHD3 (EC 3.1.1.32) (EC 3.1.1.4) (Abhydrolase domain-containing protein 3)	ABHD3	9	25.3813	26.0302	26.0928	25.445	26.4379	26.2833	26.1524	26.5789	26.1173	26.1729	26.2785	26.0057	25.4397	25.5995	25.5458	26.087	25.961	25.6877	25.3805	25.4109	26.5572	25.5353	26.7653	26.4819	26.4333	25.8675	25.7386	25.3961	26.1092	25.6612	25.6368	25.6162	27.481	24.9922	26.2825	26.1208	26.7383	25.7007	25.651	26.9715	25.3942	25.6891	26.3925	26.1415	26.6367
Q8WTS1	ABHD5_HUMAN	1-acylglycerol-3-phosphate O-acyltransferase ABHD5 (EC 2.3.1.51) (Abhydrolase domain-containing protein 5) (Lipid droplet-binding protein CGI-58)	ABHD5 NCIE2 CGI-58	2	19.84	16.5632	20.1381	20.5432	19.4541	18.429	0.62663	21.7733	19.9083	19.2254	20.1813	19.6428	19.9952	18.2548	19.5206	20.6149	20.8608	20.8608	20.971	20.6748	21.0431	20.5915	20.2882	20.6246	20.5364	20.7514	21.4892	21.0972	21.1379	20.4778	20.9049	20.3659	16.7296	21.4253	0.74354	16.6884	21.2988	19.6844	18.2009	16.8616	20.0867	20.4061	19.7179	21.0767	19.8827
Q9BV23	ABHD6_HUMAN	Monoacylglycerol lipase ABHD6 (EC 3.1.1.23) (2-arachidonoylglycerol hydrolase) (Abhydrolase domain-containing protein 6)	ABHD6	12	26.3129	27.3003	26.8501	26.8671	26.7069	27.4008	27.2765	27.7653	27.636	26.8071	26.8038	27.2368	26.8925	26.5788	27.2489	27.342	27.4381	27.373	27.1953	27.4975	27.1273	26.8246	27.1086	26.9422	26.9597	27.4551	27.1736	27.311	27.1691	27.1412	27.2416	27.2393	27.9623	26.9073	27.6039	27.4595	27.6491	27.1792	26.7036	27.5209	26.8188	27.0787	27.5335	27.2675	27.6405
Q9NUJ1	ABHDA_HUMAN	Palmitoyl-protein thioesterase ABHD10, mitochondrial (EC 3.1.2.22) (Acyl-protein thioesterase ABHD10) (Alpha/beta hydrolase domain-containing protein 10) (Abhydrolase domain-containing protein 10) (Mycophenolic acid acyl-glucuronide esterase, mitochondrial) (EC 3.1.1.93)	ABHD10	11	28.4213	30.0544	29.9342	28.2953	28.6819	29.531	29.8536	27.9723	28.2191	30.1043	28.6453	29.1794	28.7032	28.5543	28.4047	29.5989	27.5517	29.368	27.9461	27.6792	28.3767	27.4813	27.7185	29.3546	28.2147	28.0622	27.4353	29.0449	29.2128	28.1099	29.0869	28.9861	30.0768	27.463	29.7936	27.0584	29.5916	29.7562	29.2036	29.3143	28.4851	28.0116	28.8394	28.8194	30.4388
Q8NFV4	ABHDB_HUMAN	Protein ABHD11 (EC 3.-.-.-) (Alpha/beta hydrolase domain-containing protein 11) (Abhydrolase domain-containing protein 11) (Williams-Beuren syndrome chromosomal region 21 protein)	ABHD11 WBSCR21 PP1226	9	25.4311	26.9069	27.5723	26.5284	26.7338	26.583	27.3078	26.6587	26.8383	27.4554	25.8915	26.5248	25.4465	25.6472	25.5943	26.8065	27.3684	26.8057	27.2637	26.2315	27.2904	26.4751	26.1488	26.2436	25.4563	27.344	25.3242	25.7744	25.6872	25.7494	25.7894	26.0818	27.7574	26.9949	26.9852	26.5906	26.4609	26.3113	26.6318	26.328	25.9531	27.2599	26.0099	25.8108	26.3096
Q7L211	ABHDD_HUMAN	Protein ABHD13 (EC 3.-.-.-) (Alpha/beta hydrolase domain-containing protein 13) (Abhydrolase domain-containing protein 13)	ABHD13 C13orf6	2	19.4317	20.3077	20.3848	20.5973	20.3371	20.5709	21.4955	21.5609	21.4036	20.8906	19.9863	19.9782	18.8579	19.419	20.6889	21.5097	21.0645	20.3595	20.3052	20.5325	21.4079	19.3623	21.4273	21.698	20.5328	20.9813	19.4011	19.2676	20.511	20.2807	19.6198	20.8952	20.9487	21.4734	19.8824	20.447	21.4994	19.0576	20.1274	20.8594	20.4471	21.4535	20.4492	21.0404	21.041
Q9BUJ0	ABHEA_HUMAN	Protein ABHD14A (EC 3.-.-.-) (Alpha/beta hydrolase domain-containing protein 14A) (Abhydrolase domain-containing protein 14A)	ABHD14A UNQ1913/PRO4373	3	20.9374	23.3078	23.1477	22.001	21.9779	22.6365	22.1173	22.8044	22.5201	22.6564	21.7546	22.5343	21.3002	20.3369	21.1734	21.8122	22.4976	22.5097	22.4617	21.9503	23.2389	21.7552	22.5743	23.1109	21.6477	21.7893	21.4294	21.5439	22.046	21.6426	22.2099	20.997	23.8827	22.5269	22.2226	21.8562	22.4601	20.8147	21.06	22.4271	21.809	21.932	21.8838	23.041	24.0127
Q96IU4	ABHEB_HUMAN	Protein ABHD14B (EC 3.-.-.-) (Alpha/beta hydrolase domain-containing protein 14B) (Abhydrolase domain-containing protein 14B) (CCG1-interacting factor B)	ABHD14B CIB	5	27.047	28.7852	28.1397	27.1719	27.8568	27.8241	28.1147	28.037	27.8639	27.9465	27.97	28.0237	27.1543	26.9803	28.0457	27.6621	28.0999	27.809	27.8384	28.0858	27.988	28.6214	27.7155	27.8905	27.6887	27.9533	28.3447	27.668	27.0408	27.4032	27.5653	27.9033	29.0364	28.0085	28.2013	28.3727	28.4099	27.2161	28.1234	28.6198	27.1597	28.0126	27.8261	26.8202	26.1794
O95870	ABHGA_HUMAN	Phosphatidylserine lipase ABHD16A (EC 3.1.-.-) (Alpha/beta hydrolase domain-containing protein 16A) (Abhydrolase domain-containing protein 16A) (HLA-B-associated transcript 5) (hBAT5) (Monoacylglycerol lipase ABHD16A) (EC 3.1.1.23) (Protein G5)	ABHD16A BAT5 G5 NG26 PP199	19	29.3166	30.3905	30.2593	30.0901	29.7804	30.3864	30.6499	29.9351	30.3987	30.2389	29.6505	30.2991	30.3274	29.9732	30.3765	30.3152	30.2371	30.5671	29.9679	30.1573	30.0995	30.2212	30.167	30.2101	30.0446	30.1617	30.1022	30.6465	30.2986	29.8828	30.2096	30.4104	30.7873	29.9072	30.226	29.7732	30.1266	30.2757	29.6236	30.2747	29.9212	29.5	30.0389	29.9875	30.8392
Q8IZP0	ABI1_HUMAN	Abl interactor 1 (Abelson interactor 1) (Abi-1) (Abl-binding protein 4) (AblBP4) (Eps8 SH3 domain-binding protein) (Eps8-binding protein) (Nap1-binding protein) (Nap1BP) (Spectrin SH3 domain-binding protein 1) (e3B1)	ABI1 SSH3BP1	10	28.157	29.7347	27.706	27.2999	27.5249	27.8447	27.8131	26.8663	27.4017	28.0306	28.0678	27.6906	27.6126	27.603	27.4491	27.2592	26.6813	27.3636	26.9551	26.8708	26.8758	26.8697	26.2572	27.3764	27.425	27.1614	26.9059	28.3365	27.1584	27.1698	27.6512	27.8378	28.0498	26.8672	27.3546	27.1162	28.2321	27.5971	28.2269	27.8823	27.824	27.0803	27.6086	27.9635	28.9918
Q9NYB9	ABI2_HUMAN	Abl interactor 2 (Abelson interactor 2) (Abi-2) (Abl-binding protein 3) (AblBP3) (Arg-binding protein 1) (ArgBP1)	ABI2 ARGBPIA	3	26.1233	25.6394	25.222	25.4017	25.1492	25.5174	25.6756	25.1222	25.7532	25.4259	25.654	24.9509	25.0953	25.0185	24.8247	24.5961	24.2758	24.8685	24.2825	24.4279	24.4341	24.5801	24.1954	24.7701	25.1448	24.655	24.9406	25.4229	24.7713	25.3339	25.1668	25.0245	25.6968	25.4145	25.0377	25.0318	25.2967	25.9585	25.3987	25.874	25.5982	25.4118	25.6202	24.3729	28.6367
O14639	ABLM1_HUMAN	Actin-binding LIM protein 1 (abLIM-1) (Actin-binding LIM protein family member 1) (Actin-binding double zinc finger protein) (LIMAB1) (Limatin)	ABLIM1 ABLIM KIAA0059 LIMAB1	13	24.5468	26.7494	25.6592	23.917	25.3265	25.8066	24.9338	24.7291	25.0185	26.1739	25.382	25.3933	25.4538	24.7703	25.4228	25.7022	25.3204	26.0923	25.1677	25.0847	24.9035	25.0053	24.7761	25.5121	24.2006	25.2085	24.6824	25.5815	24.9769	24.9258	24.5001	25.1574	25.7035	24.096	25.065	23.5692	24.5896	25.3451	25.4903	24.7086	25.2227	23.8763	25.0999	25.0155	25.7658
Q12979	ABR_HUMAN	Active breakpoint cluster region-related protein	ABR	10	26.329	28.1873	26.465	26.8732	26.9954	27.1136	27.5696	27.9219	28.3496	27.0231	26.5301	26.7681	26.5898	26.6299	26.8178	26.6204	27.7379	26.3039	27.3838	27.6038	27.8716	27.7349	27.5426	26.6015	27.5902	28.0126	28.1534	27.1249	26.3817	27.4693	26.6107	26.7472	27.2433	26.9739	27.1383	27.7699	27.4623	26.3053	26.9498	27.3546	27.0384	28.0189	27.0009	26.7899	26.6923
Q13085	ACACA_HUMAN	Acetyl-CoA carboxylase 1 (ACC1) (EC 6.4.1.2) (Acetyl-Coenzyme A carboxylase alpha) (ACC-alpha)	ACACA ACAC ACC1 ACCA	65	28.3449	29.3822	29.3128	28.7134	28.8449	29.9123	29.3151	29.6526	29.5881	29.1965	28.8558	28.748	28.865	28.8814	28.5926	28.4376	29.7369	28.3812	29.3653	29.3523	29.4407	30.1235	29.1933	28.3388	28.989	29.5285	30.2045	29.173	28.2765	28.7858	28.3808	28.9432	29.4727	28.7184	28.956	29.9724	29.6236	28.7578	28.9555	29.7059	28.5979	29.7569	29.4449	28.2315	29.7795
O00763	ACACB_HUMAN	Acetyl-CoA carboxylase 2 (EC 6.4.1.2) (ACC-beta)	ACACB ACC2 ACCB	11	25.7972	26.1397	26.3936	26.0219	26.1024	26.8167	26.7409	26.8554	27.1894	26.4612	26.0587	26.1573	26.2343	26.2491	25.8788	25.8044	27.3287	25.7295	26.8572	26.7803	26.8203	28.013	26.5771	25.468	26.4158	26.8633	27.7863	26.6419	25.0774	26.407	26.1439	26.3511	26.5915	25.6871	26.1807	27.5158	26.6548	25.6617	26.4235	27.0633	26.0057	27.436	26.6637	25.4462	27.3109
Q9UKU7	ACAD8_HUMAN	Isobutyryl-CoA dehydrogenase, mitochondrial (IBDH) (EC 1.3.8.-) (Activator-recruited cofactor 42 kDa component) (ARC42) (Acyl-CoA dehydrogenase family member 8) (ACAD-8)	ACAD8 ARC42 IBD	18	26.6434	28.3457	28.3369	27.0941	27.126	27.69	28.3313	25.9426	26.7475	28.3874	27.1417	27.9326	27.1569	27.2381	26.9236	27.619	26.5858	28.1686	26.3032	26.8308	26.6764	26.6775	26.7999	27.9036	26.8904	26.4046	26.8053	27.8235	27.8829	26.4306	27.5761	27.46	28.3141	27.5031	27.937	26.9836	27.6739	28.4451	27.7701	27.5538	27.482	26.749	27.2032	27.3061	29.5091
Q9H845	ACAD9_HUMAN	Complex I assembly factor ACAD9, mitochondrial (Acyl-CoA dehydrogenase family member 9) (ACAD-9) (EC 1.3.8.-)	ACAD9	20	27.1045	28.5388	28.2402	27.6955	27.5209	28.3538	28.6964	27.5117	28.1815	28.4802	27.7089	27.7273	28.1678	27.8513	27.537	28.2899	27.5569	28.0234	27.3864	27.7975	27.3769	27.9547	27.582	28.2925	27.7141	27.536	27.4519	27.8924	28.312	27.5798	27.797	27.9989	28.4185	28.2656	28.8931	27.4721	28.4517	28.1309	27.7319	27.9817	27.9033	27.8836	27.8456	28.347	30.1753
P11310	ACADM_HUMAN	Medium-chain specific acyl-CoA dehydrogenase, mitochondrial (MCAD) (EC 1.3.8.7) (Medium chain acyl-CoA dehydrogenase) (MCADH)	ACADM	19	29.5516	31.2425	31.0858	29.7015	30.3971	30.6837	31.4258	29.5226	29.6988	31.5747	30.3871	30.2113	29.7915	29.9464	29.3728	30.8472	28.9793	30.7841	28.524	28.9927	29.4297	29.5303	29.1171	30.6573	29.3419	29.2324	28.9107	30.2624	30.6226	29.0359	30.287	30.2931	31.4417	28.8308	31.4249	28.6501	30.8433	30.7017	30.5192	30.6421	30.1573	29.3535	30.1448	30.1181	31.3068
P16219	ACADS_HUMAN	Short-chain specific acyl-CoA dehydrogenase, mitochondrial (SCAD) (EC 1.3.8.1) (Butyryl-CoA dehydrogenase)	ACADS	10	27.2339	29.5359	28.7079	27.5516	27.4151	28.4105	28.5226	26.8651	27.1882	29.3189	27.8008	28.4819	27.5138	27.4362	27.6333	28.2181	26.6449	28.7889	27.1573	27.3351	27.0967	27.0633	27.7543	28.5067	26.3497	27.2037	27.8192	27.8533	27.6678	27.1564	28.1945	28.249	28.7295	27.1305	28.6535	26.9273	28.7923	28.5855	28.7215	28.2814	27.1551	26.8527	27.666	27.8566	29.4446
P49748	ACADV_HUMAN	Very long-chain specific acyl-CoA dehydrogenase, mitochondrial (VLCAD) (EC 1.3.8.9)	ACADVL VLCAD	37	32.8605	34.5323	34.2757	33.4009	33.4588	33.9566	34.2749	33.2351	33.6732	34.2899	33.3262	33.6915	33.6452	33.4083	33.4175	34.5361	32.9192	34.1137	32.7039	33.1766	33.0687	33.0722	33.1683	34.1095	33.4417	33.0296	32.6382	34.0554	34.5914	33.6434	33.7756	33.6473	34.6418	32.731	34.5644	32.4131	33.7419	34.4265	33.7663	33.7641	33.2194	33.1544	33.5686	33.9606	34.9545
O00400	ACATN_HUMAN	Acetyl-coenzyme A transporter 1 (AT-1) (Acetyl-CoA transporter 1) (Solute carrier family 33 member 1)	SLC33A1 ACATN AT1	7	26.0608	26.8924	26.5916	26.4131	26.4848	26.7309	26.862	26.0491	26.8711	26.9728	26.8875	26.1959	26.3913	26.5732	26.4147	26.6356	25.9849	26.5811	25.8648	26.1952	26.1362	26.6623	26.4878	26.6131	26.575	26.5368	26.9232	26.762	26.6279	26.5296	26.4174	26.6172	27.129	26.4705	26.5823	25.9364	26.7447	26.6722	26.0718	26.6235	26.4378	26.2265	26.6512	26.5655	28.2773
Q8NC06	ACBD4_HUMAN	Acyl-CoA-binding domain-containing protein 4	ACBD4 HMFT0700	1	25.1826	26.1649	24.7506	25.0168	24.6236	25.2871	25.1583	24.9242	25.3075	25.3419	23.7013	24.5693	25.8341	25.2398	25.2303	25.5756	25.5134	24.8524	24.3547	25.0207	25.1355	25.1229	25.5697	25.4174	25.1136	25.3072	25.7327	25.2239	25.4276	26.3273	25.1739	24.6292	24.6985	23.3354	25.0623	24.8082	24.3378	25.3152	25.0805	25.0694	24.9264	25.2343	25.5258	26.2279	26.2959
Q5T8D3	ACBD5_HUMAN	Acyl-CoA-binding domain-containing protein 5	ACBD5 KIAA1996	16	28.6986	30.2388	30.0748	29.7278	29.783	30.2614	30.4364	29.8082	30.322	30.2091	29.6122	29.461	30.0385	29.7426	29.9154	30.1587	29.9234	29.705	29.302	29.555	29.7275	29.8288	30.1385	30.1924	30.0426	29.9581	30.1401	29.4004	30.0086	30.0474	29.8254	29.0719	30.099	28.8618	29.9259	28.8211	29.9542	30.2334	29.0386	29.8578	29.6204	29.6603	29.9889	30.8617	31.7652
P07108	ACBP_HUMAN	Acyl-CoA-binding protein (ACBP) (Diazepam-binding inhibitor) (DBI) (Endozepine) (EP)	DBI	6	26.45	27.0888	26.8639	24.8601	26.8858	26.6015	26.7768	25.2294	25.8146	26.3434	27.4366	27.2487	26.0898	26.0121	27.1424	26.8046	26.4515	27.106	26.3645	26.9963	26.454	26.6049	26.6581	26.5326	27.0276	26.3753	25.679	26.7547	25.8497	25.9977	27.2289	27.1272	26.9628	25.7886	26.3612	26.6979	27.1301	25.3318	27.059	27.5379	25.7215	25.3703	26.5908	26.0027	25.7415
Q6JQN1	ACD10_HUMAN	Acyl-CoA dehydrogenase family member 10 (ACAD-10) (EC 1.3.99.-)	ACAD10	9	23.7564	24.5935	25.2466	23.1419	23.5433	23.8057	24.1563	22.839	23.5486	24.8307	24.126	24.8114	24.796	24.3023	24.605	24.7878	23.9994	24.787	24.3094	23.9965	24.9186	23.6043	24.616	24.5295	24.2288	24.9358	25.0362	24.6286	24.587	24.0238	24.8357	24.4175	24.9067	22.4405	24.556	22.9891	23.5052	22.9506	24.4715	24.1614	23.1735	24.1267	23.0856	25.7185	24.5073
Q709F0	ACD11_HUMAN	Acyl-CoA dehydrogenase family member 11 (ACAD-11) (EC 1.3.8.-)	ACAD11	22	27.9312	29.1288	29.757	28.5185	27.946	29.5197	30.0343	29.4603	29.4474	29.1937	28.5115	28.2674	29.3068	28.4159	29.0056	29.5309	28.9788	29.493	28.0092	28.8325	29.28	28.6295	29.0024	28.9074	29.3101	29.0562	28.6867	27.9649	29.2385	28.181	29.0247	28.8602	29.2935	27.8542	30.0078	28.4055	29.1294	28.6181	28.5263	29.1647	28.4192	28.6594	29.1424	29.2338	30.2444
P45954	ACDSB_HUMAN	Short/branched chain specific acyl-CoA dehydrogenase, mitochondrial (SBCAD) (EC 1.3.8.5) (2-methyl branched chain acyl-CoA dehydrogenase) (2-MEBCAD) (2-methylbutyryl-coenzyme A dehydrogenase) (2-methylbutyryl-CoA dehydrogenase)	ACADSB	14	28.4952	30.1127	29.8581	28.3106	28.7713	29.5378	29.8339	28.3924	28.6983	30.0442	28.677	28.9755	28.5715	28.4731	28.2377	29.6564	27.9364	29.4378	27.8967	27.9791	28.3666	28.3077	27.9497	29.2252	28.5017	27.9957	27.9038	28.891	29.0766	28.3565	29.073	28.9986	30.4577	27.5066	29.587	27.6803	29.4207	29.5552	29.2989	29.234	28.795	28.3273	28.9852	28.8432	30.0853
P12821	ACE_HUMAN	Angiotensin-converting enzyme (ACE) (EC 3.2.1.-) (EC 3.4.15.1) (Dipeptidyl carboxypeptidase I) (Kininase II) (CD antigen CD143) [Cleaved into: Angiotensin-converting enzyme, soluble form]	ACE DCP DCP1	2	21.8443	23.4054	22.7656	22.4711	22.276	23.844	22.8953	22.2182	20.7556	22.8169	22.5221	20.898	20.0687	21.2884	20.6024	17.6351	19.3842	20.5489	20.1332	20.6971	19.2523	17.4365	19.7889	20.3699	20.1687	20.8569	20.0756	21.4483	21.0588	20.9461	20.5957	20.7907	23.4461	24.0489	21.7183	22.9854	23.5443	22.9913	22.8679	23.2294	22.6168	20.3559	22.2097	18.5572	20.1652
P32297	ACHA3_HUMAN	Neuronal acetylcholine receptor subunit alpha-3	CHRNA3 NACHRA3	10	26.2569	27.1333	26.7971	26.299	26.3764	27.9526	26.8392	26.7035	27.966	27.4366	26.2991	27.4395	26.5867	25.9604	26.8758	27.2025	26.6244	26.486	25.6289	27.4954	27.2524	26.0804	27.8964	26.8287	27.1018	26.7753	27.0361	27.0189	27.2293	27.0049	26.4224	27.5324	27.4402	26.0672	26.9222	26.1954	27.1948	26.8662	26.2159	26.968	26.3167	26.7544	27.727	27.7804	28.1786
Q9UKV3	ACINU_HUMAN	Apoptotic chromatin condensation inducer in the nucleus (Acinus)	ACIN1 ACINUS KIAA0670	6	24.0908	23.9238	23.7432	24.2035	22.5959	23.7845	24.2335	23.7647	23.812	24.0002	23.7426	22.879	24.3007	23.7907	23.0138	23.1448	23.3148	22.8303	22.7374	22.0344	22.7986	22.6714	22.9986	22.8901	22.9253	23.139	22.5732	23.0975	22.5343	23.8299	22.6538	23.3817	24.2138	21.5126	23.8989	23.2482	23.7505	23.797	23.6192	23.9926	24.7053	23.7081	24.0605	23.676	24.5622
Q6P4H8	ACKMT_HUMAN	ATP synthase subunit C lysine N-methyltransferase (EC 2.1.1.-) (Protein N-lysine methyltransferase FAM173B) (hFAM173B)	ATPSCKMT FAM173B	1	21.4822	22.4254	21.2561	20.2403	20.3943	20.4443	21.5791	18.3063	21.1272	21.3513	19.9588	19.8208	19.4562	19.7052	20.2832	18.8203	20.07	20.1804	18.8948	19.653	19.841	19.5133	17.3868	20.6858	19.8282	20.1273	19.4086	19.2026	21.0501	19.4922	20.1378	19.8918	21.678	19.2356	21.4493	20.6036	20.7024	20.2675	20.5339	20.1009	20.0826	20.0573	19.422	20.5635	21.0405
O96019	ACL6A_HUMAN	Actin-like protein 6A (53 kDa BRG1-associated factor A) (Actin-related protein Baf53a) (ArpNbeta) (BRG1-associated factor 53A) (BAF53A) (INO80 complex subunit K)	ACTL6A BAF53 BAF53A INO80K	3	23.6794	23.5307	23.5508	24.0063	23.2655	23.8265	23.6751	23.8599	24.2501	23.5734	23.2616	23.3069	24.2857	23.8901	23.4362	23.6079	23.5032	23.7415	23.617	23.6843	23.4393	24.0077	23.2545	23.5888	24.5586	22.898	23.828	23.5521	23.2003	23.6082	23.5186	23.1725	23.7684	23.3726	23.5348	22.9659	23.2947	23.4453	23.5351	24.0411	23.712	24.0023	23.4801	23.5737	28.428
P53396	ACLY_HUMAN	ATP-citrate synthase (EC 2.3.3.8) (ATP-citrate (pro-S-)-lyase) (ACL) (Citrate cleavage enzyme)	ACLY	13	26.4852	26.4247	26.2805	25.3351	24.3938	26.7255	25.7149	25.5846	25.1454	26.2517	25.6744	25.7185	26.4926	26.0085	25.8335	25.4164	25.1838	25.8621	25.2913	25.2996	24.9687	25.1334	24.9206	25.338	25.6738	25.8339	26.8138	26.2207	25.1979	24.3165	25.7919	26.018	26.2106	26.5216	25.7151	26.5026	26.5803	26.0206	26.8134	27.0636	25.3921	25.528	26.2782	25.1233	27.845
Q8WXI4	ACO11_HUMAN	Acyl-coenzyme A thioesterase 11 (Acyl-CoA thioesterase 11) (EC 3.1.2.-) (Acyl-CoA thioester hydrolase 11) (Adipose-associated thioesterase) (Brown fat-inducible thioesterase) (BFIT) (Palmitoyl-coenzyme A thioesterase) (EC 3.1.2.2)	ACOT11 BFIT KIAA0707 THEA	17	28.0619	28.3775	28.1929	27.9543	27.3614	29.0203	28.2582	28.7974	28.689	28.2717	27.5268	28.3402	28.2049	28.3271	27.8344	28.629	28.6743	27.5055	28.482	28.4913	27.8519	28.8891	28.3459	28.154	28.3555	28.3866	29.2993	28.9514	28.4534	27.6645	27.8411	28.3897	28.2744	28.3578	28.3317	28.7635	28.4885	27.7567	28.1543	28.3347	27.8855	28.0538	28.7277	28.2113	30.1971
Q9NPJ3	ACO13_HUMAN	Acyl-coenzyme A thioesterase 13 (Acyl-CoA thioesterase 13) (EC 3.1.2.-) (Hotdog-fold thioesterase superfamily member 2) (Palmitoyl-CoA hydrolase) (EC 3.1.2.2) (Thioesterase superfamily member 2) (THEM2) [Cleaved into: Acyl-coenzyme A thioesterase 13, N-terminally processed]	ACOT13 THEM2 HT012 PNAS-27	4	26.2018	27.7669	27.9355	26.6448	26.7752	27.4426	27.4898	24.9224	26.2754	27.9082	26.6083	26.3877	26.2717	25.6593	25.3797	26.8934	25.3315	27.0967	25.8845	25.128	26.9206	23.5818	24.9643	26.2718	25.3965	24.7547	25.4697	26.5704	26.5825	26.18	26.8236	26.1467	27.7761	26.1091	27.991	23.9438	26.9706	27.717	26.3969	26.977	26.1217	24.9572	26.793	26.4712	28.1073
P21399	ACOC_HUMAN	Cytoplasmic aconitate hydratase (Aconitase) (EC 4.2.1.3) (Citrate hydro-lyase) (Ferritin repressor protein) (Iron regulatory protein 1) (IRP1) (Iron-responsive element-binding protein 1) (IRE-BP 1)	ACO1 IREB1	20	27.9512	28.8921	28.2722	27.0897	26.7518	28.1722	27.6901	27.0831	27.1392	28.1124	27.9547	28.416	27.5291	27.6561	28.6177	27.8022	27.1674	28.3617	26.7008	27.5915	27.4123	27.1026	27.4277	27.8079	27.8695	27.4446	27.0629	28.657	26.2903	26.3651	28.2143	28.4288	28.4756	26.7631	27.3366	27.9123	28.7922	26.6101	28.8054	29.1102	27.1454	27.7192	28.2138	26.4791	27.6353
O00767	ACOD_HUMAN	Stearoyl-CoA desaturase (hSCD1) (EC 1.14.19.1) (Acyl-CoA desaturase) (Delta(9)-desaturase) (Delta-9 desaturase) (Fatty acid desaturase)	SCD FADS5 SCD1 SCDOS	6	23.9694	25.1619	25.4193	23.5882	25.221	24.343	25.2919	25.066	25.9593	23.3764	23.3882	22.3494	25.2617	24.064	24.2367	24.0518	23.7303	23.0241	22.5943	24.4611	24.661	23.966	23.9895	23.9461	24.8601	24.5336	25.3319	23.5028	23.5172	25.0621	24.6457	23.9116	26.3316	23.2582	24.1564	23.6137	23.4216	24.1786	23.9703	23.7039	25.5487	24.8224	24.9855	24.833	27.706
Q99798	ACON_HUMAN	Aconitate hydratase, mitochondrial (Aconitase) (EC 4.2.1.3) (Citrate hydro-lyase)	ACO2	41	32.1205	33.9944	33.6336	31.8599	32.6343	33.363	33.5907	31.5489	31.8339	33.9063	32.7859	33.0192	32.3913	32.169	32.1764	33.5621	31.256	33.5422	31.2296	31.5219	32.0381	31.4529	31.4351	33.1094	31.9705	31.6464	30.7148	32.7748	32.9275	31.5206	32.829	33.042	34.0332	30.6661	33.4701	31.0562	33.0974	33.5172	32.9963	32.9587	32.345	31.6194	32.6844	32.3216	33.7742
Q86TX2	ACOT1_HUMAN	Acyl-coenzyme A thioesterase 1 (Acyl-CoA thioesterase 1) (EC 3.1.2.-) (CTE-I) (CTE-Ib) (Inducible cytosolic acyl-coenzyme A thioester hydrolase) (Long chain acyl-CoA thioester hydrolase) (Long chain acyl-CoA hydrolase) (Palmitoyl-coenzyme A thioesterase) (EC 3.1.2.2)	ACOT1 CTE1	19	27.2131	29.3177	28.7042	27.3152	28.2281	28.3812	28.4981	27.0402	27.4653	29.1654	27.7671	28.3934	27.3646	27.3731	27.7203	28.6016	27.2606	28.8741	27.4164	27.0115	27.5904	26.2477	27.0394	28.3187	26.8605	27.2998	26.7338	28.0867	27.8113	26.5409	27.8782	27.9392	29.4197	26.7934	28.6479	26.6111	28.3351	28.7426	28.2546	28.1243	27.2045	26.9189	27.4693	26.952	29.2621
Q8N9L9	ACOT4_HUMAN	Peroxisomal succinyl-coenzyme A thioesterase (EC 3.1.2.3) (Acyl-coenzyme A thioesterase 4) (Acyl-CoA thioesterase 4) (EC 3.1.2.2) (PTE-2b) (Peroxisomal acyl coenzyme A thioester hydrolase Ib) (Peroxisomal long-chain acyl-CoA thioesterase Ib) (PTE-Ib)	ACOT4 PTE2B PTEIB	4	21.6544	22.7398	24.1867	23.6615	24.7998	22.1807	24.013	23.602	23.4717	23.6031	24.1584	22.6797	24.0424	23.2874	23.1329	22.9206	22.4039	24.2261	23.8908	23.2426	22.0686	22.8273	23.8063	24.1765	22.2696	23.5166	23.7655	23.8577	23.969	21.3202	23.7183	23.4757	24.8176	22.4857	23.369	22.2008	23.781	24.4074	20.5872	23.6655	23.6057	23.0614	21.1982	23.2577	25.987
O14734	ACOT8_HUMAN	Acyl-coenzyme A thioesterase 8 (Acyl-CoA thioesterase 8) (EC 3.1.2.1) (EC 3.1.2.11) (EC 3.1.2.2) (EC 3.1.2.3) (EC 3.1.2.5) (Choloyl-coenzyme A thioesterase) (EC 3.1.2.27) (HIV-Nef-associated acyl-CoA thioesterase) (Peroxisomal acyl-CoA thioesterase 2) (PTE-2) (Peroxisomal acyl-coenzyme A thioester hydrolase 1) (PTE-1) (Peroxisomal long-chain acyl-CoA thioesterase 1) (Thioesterase II) (hACTE-III) …	ACOT8 ACTEIII PTE1	7	26.3242	28.0632	28.2874	26.9762	27.4203	28.2734	28.7871	27.9114	27.755	28.2174	27.389	27.2743	27.265	26.7188	27.3303	27.1561	27.5145	27.7433	27.5172	27.1628	27.8219	27.5155	27.6542	27.6985	27.481	27.6866	27.1823	26.7411	28.0266	26.9446	27.8496	27.517	28.6364	26.8449	28.1884	27.1515	28.0277	27.5333	26.9646	27.5747	27.3367	27.3115	27.838	27.905	28.0738
Q9Y305	ACOT9_HUMAN	Acyl-coenzyme A thioesterase 9, mitochondrial (Acyl-CoA thioesterase 9) (EC 3.1.2.-) (Acyl-CoA thioester hydrolase 9)	ACOT9 CGI-16	17	27.7375	28.9949	28.9508	27.9175	27.5684	28.6194	28.8587	27.8857	27.8121	29.1393	27.8773	28.3582	28.2018	28.2249	27.4587	28.5697	27.5741	28.5028	27.29	27.2196	27.5015	27.5378	27.5364	28.2516	27.6368	27.4586	27.784	27.8756	28.4865	27.9382	28.345	27.5012	29.3202	28.0094	28.7112	27.3397	28.6132	28.7749	28.3906	27.939	28.093	27.5873	28.0634	28.4391	29.4628
Q15067	ACOX1_HUMAN	Peroxisomal acyl-coenzyme A oxidase 1 (AOX) (EC 1.3.3.6) (Palmitoyl-CoA oxidase) (Straight-chain acyl-CoA oxidase) (SCOX) [Cleaved into: Peroxisomal acyl-CoA oxidase 1, A chain; Peroxisomal acyl-CoA oxidase 1, B chain; Peroxisomal acyl-CoA oxidase 1, C chain]	ACOX1 ACOX	23	30.9672	32.3311	32.4953	31.5376	31.9629	32.5116	33.0154	32.3386	32.8368	32.6654	32.1464	31.639	31.5782	31.4843	31.8569	32.5114	31.5281	31.8843	31.8408	31.6689	32.1554	32.2945	31.9141	32.3309	32.1582	32.0598	31.6096	31.5551	32.6298	31.5543	32.1387	32.4423	33.4924	31.1853	32.5584	31.5333	31.8096	31.8543	31.4555	32.7016	32.0474	31.8423	32.36	32.457	33.6031
Q99424	ACOX2_HUMAN	Peroxisomal acyl-coenzyme A oxidase 2 (EC 1.17.99.3) (3-alpha,7-alpha,12-alpha-trihydroxy-5-beta-cholestanoyl-CoA 24-hydroxylase) (3-alpha,7-alpha,12-alpha-trihydroxy-5-beta-cholestanoyl-CoA oxidase) (Trihydroxycoprostanoyl-CoA oxidase) (THCA-CoA oxidase) (THCCox)	ACOX2	29	29.1954	30.9671	30.9775	29.6629	30.2875	31.0313	31.5269	30.5315	30.4339	30.9497	30.2252	30.3263	30.0218	29.911	30.2205	30.8522	29.9573	30.6561	30.2173	29.8064	30.2785	30.3662	30.3842	30.7065	30.3648	30.4041	29.956	29.8035	30.965	29.1708	30.6069	30.7063	31.5824	29.5064	30.8853	29.8703	30.9028	30.2397	29.7821	30.7704	30.1947	29.6813	30.4932	30.7236	31.0418
O15254	ACOX3_HUMAN	Peroxisomal acyl-coenzyme A oxidase 3 (EC 1.3.3.6) (Branched-chain acyl-CoA oxidase) (BRCACox) (Pristanoyl-CoA oxidase)	ACOX3 BRCOX PRCOX	23	27.8247	30.0378	29.1935	27.889	28.5422	29.1624	30.1598	29.3363	29.1296	29.4645	28.7977	28.3632	28.7102	27.9986	29.1742	29.4531	28.513	28.7422	28.5585	28.4317	28.8581	28.7782	28.5758	29.3387	29.0604	29.1329	28.5391	27.8153	28.9941	27.7408	29.3392	29.2747	29.8468	27.9589	29.6968	28.3352	29.1742	28.1715	28.2345	29.3017	28.7764	29.0343	28.9319	29.0317	28.3262
P13798	ACPH_HUMAN	Acylamino-acid-releasing enzyme (AARE) (EC 3.4.19.1) (Acyl-peptide hydrolase) (APH) (Acylaminoacyl-peptidase) (Oxidized protein hydrolase) (OPH)	APEH D3F15S2 D3S48E DNF15S2	4	25.9912	25.98	25.5526	25.1538	24.6114	25.9676	25.5253	24.9904	25.3107	25.143	25.6408	26.0622	25.7971	25.853	26.2477	25.7588	25.2404	26.0352	24.9157	25.6763	25.4591	25.417	25.6217	25.5748	25.515	25.5229	25.4248	26.6766	25.118	24.9161	26.0039	26.2361	25.6187	25.5419	25.0622	25.6656	25.9333	24.9135	26.0896	26.3049	24.8931	25.2511	25.8242	25.1408	26.2068
O14561	ACPM_HUMAN	Acyl carrier protein, mitochondrial (ACP) (CI-SDAP) (NADH-ubiquinone oxidoreductase 9.6 kDa subunit)	NDUFAB1	5	29.2141	30.6753	30.8458	29.2841	30.3218	30.7446	31.0878	29.7793	30.0503	30.8981	30.7983	30.0493	29.4615	29.8493	30.0289	30.3827	29.3199	30.4902	29.7985	29.2535	29.4877	29.446	29.4529	30.7302	30.1651	30.1423	28.6854	29.7866	30.2022	29.771	29.9095	30.0591	31.4998	29.603	31.1736	29.0771	30.4284	29.9515	29.8475	30.4701	29.785	29.7776	30.2526	30.0844	30.4061
Q9NUB1	ACS2L_HUMAN	Acetyl-coenzyme A synthetase 2-like, mitochondrial (EC 6.2.1.1) (Acetate--CoA ligase 2) (Acetyl-CoA synthetase 2) (AceCS2) (Acyl-CoA synthetase short-chain family member 1) (Propionate--CoA ligase) (EC 6.2.1.17)	ACSS1 ACAS2L KIAA1846	15	27.5885	27.9503	28.1611	26.5885	27.3193	27.7198	28.0314	26.6084	27.3936	28.7772	27.5481	27.7399	27.6403	28.2438	26.904	28.1528	26.5146	27.8088	26.1216	26.7434	26.7081	27.3599	26.3306	27.5647	26.874	26.8479	27.7625	27.3999	28.1832	27.7068	27.5529	27.5888	28.4547	27.0517	28.028	26.2564	27.6464	28.5811	27.4591	27.463	27.0627	27.0184	27.1552	26.9963	30.7837
Q9NR19	ACSA_HUMAN	Acetyl-coenzyme A synthetase, cytoplasmic (EC 6.2.1.1) (Acetate--CoA ligase) (Acetyl-CoA synthetase) (ACS) (AceCS) (Acetyl-CoA synthetase 1) (AceCS1) (Acyl-CoA synthetase short-chain family member 2) (Acyl-activating enzyme) (Propionate--CoA ligase) (EC 6.2.1.17)	ACSS2 ACAS2	2	20.4233	20.0911	20.5787	20.6551	20.013	20.8138	19.8667	21.2912	21.0037	20.1976	21.4826	21.5634	21.0637	20.4452	21.0771	20.554	22.5165	21.309	21.6747	22.2815	20.5401	22.8601	21.8379	19.9541	20.8074	21.6523	23.2691	21.8508	18.2465	21.7051	20.4495	20.646	21.1278	20.7895	20.4836	21.671	21.3148	17.5695	21.2975	21.4238	20.0412	20.9918	19.2157	19.6565	20.3075
Q96CM8	ACSF2_HUMAN	Medium-chain acyl-CoA ligase ACSF2, mitochondrial (EC 6.2.1.2)	ACSF2 UNQ493/PRO1009	9	24.8438	26.3519	25.9496	24.9167	25.2325	25.8011	26.4339	25.3961	25.4155	26.1086	24.9626	25.2275	24.5835	25.0465	24.4816	25.7382	26.1816	25.397	25.8444	25.2584	25.6404	24.5108	24.7834	25.2205	24.4589	25.457	24.3592	24.7029	25.5257	24.692	25.0815	25.0006	26.5554	26.5865	26.0309	25.0997	25.5305	26.0429	25.565	24.9313	25.2002	25.6542	25.2447	24.6901	26.763
Q4G176	ACSF3_HUMAN	Malonate--CoA ligase ACSF3, mitochondrial (EC 6.2.1.n3) (Acyl-CoA synthetase family member 3)	ACSF3 PSEC0197	11	24.6352	25.568	26.2122	24.7991	24.7836	25.5148	25.7878	25.6722	25.3352	26.4376	24.7334	25.0312	24.0481	24.7933	25.0995	25.2171	25.4939	25.1447	26.1082	25.1234	25.4767	25.4319	24.7553	25.9212	24.5502	26.1482	23.8501	24.3328	24.9211	24.9226	25.2244	24.65	26.1468	25.7904	26.3436	25.7139	25.7806	25.4892	25.5233	24.9417	24.662	25.9462	25.1536	24.6164	26.4927
P33121	ACSL1_HUMAN	Long-chain-fatty-acid--CoA ligase 1 (EC 6.2.1.3) (Acyl-CoA synthetase 1) (ACS1) (Arachidonate--CoA ligase) (EC 6.2.1.15) (Long-chain acyl-CoA synthetase 1) (LACS 1) (Long-chain acyl-CoA synthetase 2) (LACS 2) (Long-chain fatty acid-CoA ligase 2) (Palmitoyl-CoA ligase 1) (Palmitoyl-CoA ligase 2) (Phytanate--CoA ligase) (EC 6.2.1.24)	ACSL1 FACL1 FACL2 LACS LACS1 LACS2	38	31.2206	33.5163	32.9105	31.5875	32.1437	33.3307	32.7416	32.2556	32.861	32.6661	32.1645	32.1255	32.4781	32.0999	32.2665	32.9128	31.8011	32.0782	31.5205	32.2315	31.8556	31.8959	32.1699	32.4788	32.2297	32.4103	32.4263	32.583	33.1352	32.0174	32.5507	32.5778	33.7457	31.4675	33.4859	31.5587	32.3937	32.2177	32.1527	32.8651	31.9117	31.6939	32.9971	32.9364	33.6629
O95573	ACSL3_HUMAN	Long-chain-fatty-acid--CoA ligase 3 (EC 6.2.1.3) (Arachidonate--CoA ligase) (EC 6.2.1.15) (Long-chain acyl-CoA synthetase 3) (LACS 3)	ACSL3 ACS3 FACL3 LACS3	22	29.2997	30.4247	30.1858	29.4344	29.6742	30.1446	30.3332	29.8843	30.69	29.6651	29.2234	29.5275	29.5278	29.7403	29.8845	29.4597	29.0682	29.691	29.5442	29.7067	29.5572	29.4517	30.4093	30.1206	29.9156	29.7412	29.6044	30.2465	29.995	29.9536	29.648	29.8376	30.7994	29.1499	29.8852	29.4669	30.2664	29.9602	29.6016	30.1252	29.7572	29.4795	30.1158	29.7939	31.0926
O60488	ACSL4_HUMAN	Long-chain-fatty-acid--CoA ligase 4 (EC 6.2.1.3) (Arachidonate--CoA ligase) (EC 6.2.1.15) (Long-chain acyl-CoA synthetase 4) (LACS 4)	ACSL4 ACS4 FACL4 LACS4	3	21.8256	22.6651	22.9317	22.702	22.7301	23.2138	22.5604	21.1825	23.2337	23.3685	22.7031	22.0743	22.125	21.1385	21.889	22.7917	21.4313	22.3036	22.4078	22.5799	21.677	22.0291	21.6337	22.4371	21.3872	22.6664	22.4991	22.9355	22.4156	22.3369	21.3449	21.5691	23.1045	24.4149	23.3453	22.8322	21.305	23.1047	22.6356	21.844	21.9187	22.1602	22.0142	22.1057	22.5934
Q9ULC5	ACSL5_HUMAN	Long-chain-fatty-acid--CoA ligase 5 (EC 6.2.1.3) (Arachidonate--CoA ligase) (EC 6.2.1.15) (Long-chain acyl-CoA synthetase 5) (LACS 5)	ACSL5 ACS5 FACL5 UNQ633/PRO1250	33	32.5321	34.2288	33.1204	33.025	32.9547	33.9892	33.7886	33.9626	34.2624	33.7908	32.8936	33.6227	33.046	33.0283	33.7463	33.7369	33.5332	33.4987	33.0492	32.932	33.6103	33.6766	33.9172	33.6831	33.6676	33.4146	33.9927	34.0543	33.5433	33.0778	33.6274	33.8127	34.4187	31.6839	33.4619	33.0194	33.627	32.9682	32.952	33.5151	33.2527	33.3679	33.926	33.831	34.4434
Q9UKU0	ACSL6_HUMAN	Long-chain-fatty-acid--CoA ligase 6 (EC 6.2.1.3) (Arachidonate--CoA ligase) (EC 6.2.1.15) (Long-chain acyl-CoA synthetase 6) (LACS 6)	ACSL6 ACS2 FACL6 KIAA0837 LACS5	31	29.6478	31.067	30.7864	30.0413	30.2034	31.2126	31.4951	30.7696	31.2775	30.6437	29.8197	30.5802	30.4616	30.3237	30.4836	30.6855	30.1184	30.4667	30.4461	30.6007	30.4491	30.7195	30.5246	30.7304	30.4953	30.5035	30.4572	30.2884	30.9129	30.3041	30.2535	30.6259	31.7384	30.0806	31.038	30.6271	31.2271	30.343	30.1328	30.6539	30.7243	30.0973	30.7851	30.6719	30.9124
Q9H6R3	ACSS3_HUMAN	Acyl-CoA synthetase short-chain family member 3, mitochondrial (EC 6.2.1.1) (Acetate--CoA ligase 3) (Acyl-CoA synthetase short-chain family member 3) (Propionate--CoA ligase) (EC 6.2.1.17)	ACSS3	18	26.9208	28.9569	29.1194	27.0875	27.0147	28.4196	28.8704	26.7848	26.575	29.3704	27.5859	28.1154	27.5322	27.2035	27.3256	28.6339	26.9036	28.0797	26.4794	26.865	27.2516	26.4659	26.6938	28.0928	27.0118	27.0643	26.1457	27.4321	27.6937	26.4827	27.8254	27.8146	29.2145	25.6031	28.7531	26.3414	28.5028	28.273	28.134	28.1838	27.511	26.8116	27.8468	27.358	27.6305
P62736	ACTA_HUMAN	Actin, aortic smooth muscle (Alpha-actin-2) (Cell growth-inhibiting gene 46 protein) [Cleaved into: Actin, aortic smooth muscle, intermediate form]	ACTA2 ACTSA ACTVS GIG46	24	36.2213	36.0982	35.5392	35.1518	34.5691	35.8258	36.138	34.6921	35.5486	35.9034	35.2795	35.9572	35.8513	36.3429	36.0458	35.3027	34.5236	36.2815	34.7508	35.0877	34.7048	35.147	34.5645	35.2885	35.2715	35.159	35.4381	36.6311	34.7733	34.9821	36.496	36.596	35.8922	35.4286	35.4219	35.0909	36.0742	35.8548	36.1866	36.3485	35.5772	34.7636	35.6066	34.5937	37.4278
P60709	ACTB_HUMAN	Actin, cytoplasmic 1 (Beta-actin) [Cleaved into: Actin, cytoplasmic 1, N-terminally processed]	ACTB	35	36.7136	36.5165	36.0391	35.6986	35.1997	36.2513	36.5608	35.1988	36.0385	36.3811	35.8105	36.3756	36.2574	36.804	36.5461	35.8012	35.0334	36.7639	35.3236	35.4944	35.326	35.5172	35.0274	35.7823	35.8493	35.6666	35.8885	37.0314	35.2951	35.5865	36.9802	36.9978	36.3819	36.0289	35.8208	35.5318	36.5019	36.3423	36.6014	36.6893	36.1103	35.3234	36.0509	35.0575	38.0284
Q562R1	ACTBL_HUMAN	Beta-actin-like protein 2 (Kappa-actin)	ACTBL2	11	33.24	33.0657	32.5748	32.4527	31.7437	32.8372	32.9446	31.5169	32.7174	32.7896	31.9965	32.9216	33.0323	33.55	33.0513	32.2905	31.6534	33.3677	32.0184	32.2404	31.9189	32.2484	31.7248	32.4409	32.6023	32.1774	32.8594	33.9189	32.1803	32.4523	33.8051	33.4514	32.8237	33.0167	32.1853	32.0823	32.9126	33.2037	32.9444	33.1296	32.8302	31.6985	32.4635	32.4555	35.6749
Q9BYX7	ACTBM_HUMAN	Putative beta-actin-like protein 3 (Kappa-actin) (POTE ankyrin domain family member K)	POTEKP ACTBL3 FKSG30	5	35.2802	35.1093	34.699	34.3841	33.4008	34.8976	35.168	33.7234	34.4014	34.9545	34.2561	35.0889	34.8904	35.3673	35.3342	34.3886	33.8154	35.5136	34.0173	34.26	33.9799	34.1651	33.6694	34.4642	34.3267	34.3708	34.5677	35.4203	33.8027	34.0258	35.6541	35.6538	34.9168	34.5827	34.4211	34.1523	35.0473	34.8909	35.1265	35.3403	34.6511	33.7945	34.5619	33.3111	35.9176
P68032	ACTC_HUMAN	Actin, alpha cardiac muscle 1 (Alpha-cardiac actin) [Cleaved into: Actin, alpha cardiac muscle 1, intermediate form]	ACTC1 ACTC	25	36.3381	36.2314	35.6838	35.2818	34.7153	35.945	36.2565	34.8089	35.614	36.0316	35.3861	36.0912	35.8919	36.3882	36.1855	35.4237	34.6559	36.428	34.8773	35.2133	34.8578	35.2571	34.6978	35.4369	35.413	35.2502	35.4942	36.6547	34.9108	35.0929	36.6456	36.7276	36.0143	35.5538	35.5354	35.2142	36.1947	35.9566	36.3032	36.4764	35.7118	34.8708	35.7275	34.7118	37.484
P63261	ACTG_HUMAN	Actin, cytoplasmic 2 (Gamma-actin) [Cleaved into: Actin, cytoplasmic 2, N-terminally processed]	ACTG1 ACTG	34	36.6337	36.5014	35.9821	35.662	35.1295	36.2165	36.5134	35.158	36.0003	36.3131	35.732	36.3218	36.2013	36.7377	36.4948	35.7458	34.9882	36.7192	35.2802	35.4533	35.284	35.4802	34.9813	35.7328	35.7979	35.6001	35.8385	36.972	35.2458	35.5385	36.9404	36.9458	36.3535	35.9899	35.7806	35.4788	36.4935	36.3004	36.5491	36.6426	36.0672	35.2654	36.0176	35.0154	37.9615
P63267	ACTH_HUMAN	Actin, gamma-enteric smooth muscle (Alpha-actin-3) (Gamma-2-actin) (Smooth muscle gamma-actin) [Cleaved into: Actin, gamma-enteric smooth muscle, intermediate form]	ACTG2 ACTA3 ACTL3 ACTSG	22	36.1748	36.0835	35.5322	35.151	34.5687	35.8229	36.0958	34.6521	35.4891	35.8859	35.2789	35.9555	35.8499	36.3422	36.042	35.2919	34.5157	36.277	34.7497	35.0872	34.6951	35.136	34.557	35.2857	35.2706	35.1542	35.4374	36.6304	34.7725	34.9671	36.4942	36.5951	35.8691	35.4281	35.3696	35.077	36.0731	35.8543	36.1546	36.2994	35.5762	34.7083	35.5606	34.5909	37.407
P12814	ACTN1_HUMAN	Alpha-actinin-1 (Alpha-actinin cytoskeletal isoform) (F-actin cross-linking protein) (Non-muscle alpha-actinin-1)	ACTN1	50	31.3012	31.3307	30.9947	30.235	30.0362	30.8994	31.328	29.5901	30.5664	31.006	30.6176	31.3732	30.7108	31.0928	31.1117	30.6586	29.8597	31.408	30.0723	29.9712	30.0601	30.1887	29.5913	30.2289	30.4567	30.4258	30.0328	31.3548	29.7136	30.1314	31.2443	31.4143	31.0846	30.7465	30.5303	30.0772	30.8888	30.5697	31.5283	31.2092	30.8218	30.0869	30.8126	29.8454	32.2029
P35609	ACTN2_HUMAN	Alpha-actinin-2 (Alpha-actinin skeletal muscle isoform 2) (F-actin cross-linking protein)	ACTN2	13	29.1751	28.5957	28.5521	27.9959	27.8494	28.2279	28.7694	27.1419	28.3138	28.5937	28.4013	28.7341	28.4266	28.7395	28.7502	28.2205	27.521	28.9506	27.5776	27.7981	27.729	27.9638	27.2476	27.8476	28.1387	27.9613	27.7113	28.6714	27.4492	28.1127	28.6659	28.8119	28.5569	28.64	28.0645	27.5378	28.3938	28.5375	28.972	28.8102	28.5223	27.8805	28.3482	27.1548	29.9821
Q08043	ACTN3_HUMAN	Alpha-actinin-3 (Alpha-actinin skeletal muscle isoform 3) (F-actin cross-linking protein)	ACTN3	8	28.6465	27.9993	27.8027	27.4196	27.068	27.5955	28.1155	26.2989	27.8746	27.8714	27.864	28.0531	27.8711	28.1662	28.0756	27.532	26.898	28.2832	26.9887	27.2286	26.9723	27.4678	26.5713	27.1221	27.3884	27.3326	27.19	28.2669	26.6566	27.2949	27.9374	28.0628	27.7191	28.0162	27.5465	26.9427	27.6377	27.9994	28.2994	28.213	27.7131	27.2773	27.6127	26.3145	29.5987
O43707	ACTN4_HUMAN	Alpha-actinin-4 (Non-muscle alpha-actinin 4)	ACTN4	45	32.0216	32.1191	31.7409	31.2241	30.8626	31.5667	32.0229	30.4173	31.3462	31.8084	31.4312	31.7995	31.3682	31.8023	32.0217	31.2548	30.3809	32.2475	30.7427	30.8983	30.6206	30.9839	30.3018	30.9112	31.1754	31.1664	30.7699	32.1513	30.3641	30.9395	31.8645	32.0234	31.9835	31.2586	31.2657	30.8217	31.7925	31.5518	32.2321	31.9607	31.5435	30.8691	31.3257	30.2849	32.8753
P68133	ACTS_HUMAN	Actin, alpha skeletal muscle (Alpha-actin-1) [Cleaved into: Actin, alpha skeletal muscle, intermediate form]	ACTA1 ACTA	23	36.3379	36.2314	35.6837	35.2818	34.7152	35.945	36.2565	34.8088	35.614	36.0316	35.3861	36.0912	35.8919	36.3882	36.1855	35.4237	34.6559	36.428	34.8773	35.2133	34.8578	35.2571	34.6978	35.4368	35.413	35.2502	35.4942	36.6547	34.9107	35.0929	36.6456	36.7276	36.0142	35.5535	35.5352	35.2141	36.1947	35.9565	36.3032	36.4763	35.7118	34.8707	35.7275	34.7118	37.4839
P42025	ACTY_HUMAN	Beta-centractin (Actin-related protein 1B) (ARP1B)	ACTR1B CTRN2	7	26.5631	26.8994	26.1685	25.8572	24.9628	26.7433	26.4299	25.581	25.6625	26.2391	26.1929	26.2116	26.2395	26.3719	26.5238	25.9473	25.5532	26.0709	25.6361	25.6333	25.6084	25.4179	25.6946	26.0099	25.774	26.1302	25.6725	26.9227	25.3389	25.3139	26.316	26.2997	26.6076	25.9194	26.3429	26.3467	27.0421	25.6942	27.2922	26.9661	25.9179	25.9017	26.7532	25.3314	25.8555
P61163	ACTZ_HUMAN	Alpha-centractin (Centractin) (ARP1) (Actin-RPV) (Centrosome-associated actin homolog)	ACTR1A CTRN1	8	28.2593	28.6958	28.1825	27.9495	27.0092	28.6281	28.2006	27.7395	27.9527	28.0677	27.9597	28.0537	28.3591	28.5053	28.6392	27.8393	27.4705	28.2403	27.5595	27.8437	27.4781	27.7057	28.0491	28.1426	27.9306	28.1246	27.9996	29.0511	27.7803	27.2008	28.3226	28.2877	28.4941	28.403	28.2142	28.2787	28.7155	27.9145	29.0229	28.8747	27.8676	27.9825	28.4816	28.2193	28.4805
Q04771	ACVR1_HUMAN	Activin receptor type-1 (EC 2.7.11.30) (Activin receptor type I) (ACTR-I) (Activin receptor-like kinase 2) (ALK-2) (Serine/threonine-protein kinase receptor R1) (SKR1) (TGF-B superfamily receptor type I) (TSR-I)	ACVR1 ACVRLK2	3	26.3429	25.0446	25.7469	26.4766	26.059	26.206	26.5711	25.8629	27.2931	25.7372	25.6901	25.7463	26.657	26.4794	26.058	25.9964	25.4966	26.06	25.2418	25.7477	25.856	25.8387	25.6016	26.3369	26.495	26.0358	26.0419	26.6621	26.5173	26.8099	26.0811	26.0208	25.9801	25.8094	25.959	25.6581	25.6336	26.6111	25.8645	26.1862	26.3721	26.7002	26.3626	25.7459	27.2377
Q03154	ACY1_HUMAN	Aminoacylase-1 (ACY-1) (EC 3.5.1.14) (N-acyl-L-amino-acid amidohydrolase)	ACY1	8	25.5482	25.5545	25.8737	24.6583	25.2625	25.9777	25.3126	24.7784	24.9871	25.2578	26.1761	25.8236	25.1822	25.4562	25.9949	25.3462	24.7852	25.682	24.3452	24.6624	25.1825	25.2725	24.7293	25.2656	25.3649	24.7988	24.5301	26.4325	25.0519	24.2869	26.0191	26.3393	25.7253	24.6224	25.2863	24.9763	25.8554	24.6441	25.824	26.4617	24.7289	25.6269	25.7056	24.7658	26.7314
P45381	ACY2_HUMAN	Aspartoacylase (EC 3.5.1.15) (Aminoacylase-2) (ACY-2)	ASPA ACY2 ASP	5	22.7094	23.3853	22.184	20.8379	21.1726	22.3728	22.2772	21.8772	20.7998	22.1336	22.8839	22.0569	20.0761	21.3408	22.1475	21.3663	21.6056	20.5831	21.4661	21.1876	21.4062	21.2445	21.0532	21.9887	21.7639	21.5138	21.5563	21.8903	20.8877	19.4468	22.0217	21.9294	22.7107	20.5134	22.166	23.0234	23.9448	20.6028	22.994	23.5914	21.1368	22.4072	22.7281	22.5156	19.9992
P14621	ACYP2_HUMAN	Acylphosphatase-2 (EC 3.6.1.7) (Acylphosphatase, muscle type isozyme) (Acylphosphate phosphohydrolase 2)	ACYP2 ACYP	2	24.236	24.9025	24.5986	24.1625	23.2742	25.1739	24.2699	23.6659	24.3183	24.5332	24.1212	24.5453	24.4096	24.2041	24.4477	23.8171	23.944	24.7481	24.8248	24.7	23.652	24.1038	24.2654	23.9337	23.5819	23.71	24.5925	24.6221	24.7947	23.5722	24.4893	24.26	25.541	25.3497	24.5446	24.2348	24.8853	24.5912	25.4956	24.5867	24.1796	23.7684	24.8824	24.0484	24.994
O14672	ADA10_HUMAN	Disintegrin and metalloproteinase domain-containing protein 10 (ADAM 10) (EC 3.4.24.81) (CDw156) (Kuzbanian protein homolog) (Mammalian disintegrin-metalloprotease) (CD antigen CD156c)	ADAM10 KUZ MADM	12	26.7464	26.0508	25.6152	26.3203	25.3317	26.393	26.5111	26.1599	27.0822	26.4749	25.5506	26.5673	26.2894	26.342	26.0253	26.026	26.3383	26.5434	26.3638	26.0135	26.1425	25.6882	26.314	26.5137	26.125	25.783	25.5429	26.7758	26.3608	25.987	26.007	26.5077	26.6085	27.4488	26.5651	26.3866	26.2448	25.9685	25.7503	26.4569	26.2474	25.8922	26.2238	26.5759	27.9858
Q13444	ADA15_HUMAN	Disintegrin and metalloproteinase domain-containing protein 15 (ADAM 15) (EC 3.4.24.-) (Metalloprotease RGD disintegrin protein) (Metalloproteinase-like, disintegrin-like, and cysteine-rich protein 15) (MDC-15) (Metargidin)	ADAM15 MDC15	3	24.492	23.968	24.0787	23.7376	23.4788	24.4497	23.9078	24.264	24.6764	23.7063	24.3912	24.4532	24.2312	24.242	23.5615	23.7573	24.2214	24.0237	24.1594	23.9399	24.2533	24.2898	23.7355	24.4336	23.9696	24.4624	24.6357	24.0491	24.4925	24.3904	24.0545	24.3342	24.5803	24.1188	23.6976	23.8905	24.1867	24.1439	24.0562	24.3819	23.4131	23.8336	24.1935	24.4008	24.4115
P78536	ADA17_HUMAN	Disintegrin and metalloproteinase domain-containing protein 17 (ADAM 17) (EC 3.4.24.86) (Snake venom-like protease) (TNF-alpha convertase) (TNF-alpha-converting enzyme) (CD antigen CD156b)	ADAM17 CSVP TACE	5	25.6606	26.1733	25.2576	25.9975	25.8584	25.9859	25.8591	25.6099	25.568	26.0652	25.3565	26.024	25.9991	26.1089	26.0002	25.9519	25.1441	25.9816	24.9281	25.8302	25.7955	25.6599	25.9923	25.9022	25.7097	25.4515	25.5085	26.2937	26.2692	25.7964	26.1879	26.259	26.1377	26.1489	25.1208	25.725	27.8923	25.8206	25.4885	25.4466	25.8346	25.6915	26.8448	26.3718	27.3044
Q13443	ADAM9_HUMAN	Disintegrin and metalloproteinase domain-containing protein 9 (ADAM 9) (EC 3.4.24.-) (Cellular disintegrin-related protein) (Meltrin-gamma) (Metalloprotease/disintegrin/cysteine-rich protein 9) (Myeloma cell metalloproteinase)	ADAM9 KIAA0021 MCMP MDC9 MLTNG	13	26.4397	27.2849	26.3555	26.7111	27.1055	26.9253	26.9526	27.0104	27.4668	26.8033	26.9841	27.0878	26.6402	26.5197	27.0972	26.9955	26.4116	27.0751	26.3857	26.4496	26.7778	26.9668	26.8814	27.1866	26.755	26.6645	26.5491	27.4996	26.7794	26.9382	27.0748	27.2949	27.3109	26.8364	26.7388	26.874	26.6207	27.1371	26.155	27.0439	26.8224	26.6724	27.0569	26.9536	28.9518
O00116	ADAS_HUMAN	Alkyldihydroxyacetonephosphate synthase, peroxisomal (Alkyl-DHAP synthase) (EC 2.5.1.26) (Aging-associated gene 5 protein) (Alkylglycerone-phosphate synthase)	AGPS AAG5	23	27.8015	29.5876	29.6388	28.3887	28.904	29.5643	30.2094	29.3211	29.6623	29.9291	29.16	28.8347	28.5248	28.4986	28.8509	29.4342	28.5406	29.1239	28.8019	28.3308	29.0672	28.5375	28.7843	29.3737	28.9276	28.9136	28.4505	28.2074	29.4211	28.2891	29.2145	29.0541	30.3065	28.9017	29.7176	28.3649	29.5396	28.8692	28.6019	29.7235	28.8372	28.8572	29.2008	29.3913	29.1043
Q86TW2	ADCK1_HUMAN	AarF domain-containing protein kinase 1 (EC 2.7.-.-)	ADCK1	14	26.5062	28.0119	28.0829	27.6265	26.9294	27.8993	28.8291	27.5876	28.3592	28.3702	27.4931	28.2096	27.3452	27.5062	27.8649	28.4031	27.6365	27.9765	27.0581	27.1016	27.5128	27.3907	27.454	28.2389	27.8194	27.4202	26.6297	27.0419	27.9345	27.5405	27.9815	27.6964	28.768	26.5369	28.6734	26.8721	28.1869	27.6601	27.6477	27.4033	27.7895	27.9164	27.6159	27.8763	28.2082
Q3MIX3	ADCK5_HUMAN	Uncharacterized aarF domain-containing protein kinase 5 (EC 2.7.11.-)	ADCK5	5	22.8321	22.7628	24.6051	23.6635	22.7692	23.6149	24.9688	23.6184	24.1955	24.5592	23.8984	24.6239	24.235	24.1776	24.3934	24.2467	24.0602	24.2443	23.6872	23.5521	24.3548	23.7496	23.626	24.453	23.7634	24.0997	23.3171	23.5735	24.0893	23.0551	24.4271	23.2292	24.2727	23.4765	25.2695	21.2	23.546	23.8237	23.0401	24.2418	23.4586	24.0268	23.7483	24.3351	23.0132
Q08828	ADCY1_HUMAN	Adenylate cyclase type 1 (EC 4.6.1.1) (ATP pyrophosphate-lyase 1) (Adenylate cyclase type I) (Adenylyl cyclase 1) (Ca(2+)/calmodulin-activated adenylyl cyclase)	ADCY1	4	21.1736	19.9959	18.6049	19.1296	17.8932	19.5076	16.6767	19.6025	18.3124	19.3297	19.6676	18.4262	19.5709	18.6641	18.5233	16.783	19.1287	18.8368	21.8431	19.8187	17.9117	16.4888	17.907	19.3766	18.7379	19.9191	20.2167	17.8655	17.7509	18.5666	18.9916	20.7384	20.0099	23.3776	22.5192	18.6328	21.431	19.0303	19.7859	19.8281	16.8143	17.74	19.5966	21.7765	20.3774
O43306	ADCY6_HUMAN	Adenylate cyclase type 6 (EC 4.6.1.1) (ATP pyrophosphate-lyase 6) (Adenylate cyclase type VI) (Adenylyl cyclase 6) (Ca(2+)-inhibitable adenylyl cyclase)	ADCY6 KIAA0422	3	23.7197	23.431	23.429	23.5072	22.9709	24.2015	24.3916	23.9739	24.305	24.238	23.3127	23.5213	23.8642	24.7684	23.8179	23.9521	24.1844	23.9026	23.6742	23.2652	24.1278	23.8274	23.4765	23.5787	23.7955	24.2934	24.0472	24.0781	23.2816	23.8208	24.4454	24.2429	23.5805	23.7543	24.1383	24.1086	24.0938	23.5077	23.8184	24.3492	24.1325	24.5668	24.3807	22.9652	24.6835
O60503	ADCY9_HUMAN	Adenylate cyclase type 9 (EC 4.6.1.1) (ATP pyrophosphate-lyase 9) (Adenylate cyclase type IX) (ACIX) (Adenylyl cyclase 9) (AC9)	ADCY9 KIAA0520	15	26.8025	26.9597	26.511	26.4721	26.189	27.1202	26.9244	26.8429	27.7077	27.0463	26.3605	26.934	27.0988	27.1377	27.0108	26.7559	26.5723	27.3039	26.5611	26.7444	26.6826	26.9577	26.7088	27.1534	26.4369	26.4881	27.0212	27.7553	26.7198	26.6129	27.1342	27.4726	27.1819	26.5826	26.7466	27.0311	27.0635	27.0493	26.6606	27.3397	26.7527	26.9774	26.9396	26.8816	28.8851
P35611	ADDA_HUMAN	Alpha-adducin (Erythrocyte adducin subunit alpha)	ADD1 ADDA	17	27.5025	27.931	26.8217	25.9551	26.0368	27.2253	26.9373	26.1128	26.4044	27.2812	26.6708	26.7116	26.837	26.714	26.4838	26.303	25.4476	26.2943	26.3764	26.2355	25.8615	26.0593	26.063	26.2082	26.2871	26.2533	25.9275	27.1706	27.4319	26.6446	26.6286	26.8721	27.2577	26.5887	26.9846	26.7485	27.5225	26.6028	27.7869	27.0704	26.9193	26.3553	27.0572	26.9287	28.8299
P35612	ADDB_HUMAN	Beta-adducin (Erythrocyte adducin subunit beta)	ADD2 ADDB	14	24.298	26.1709	23.3734	23.7059	23.8977	24.2946	23.9524	23.2758	23.0637	23.6865	22.8935	23.4656	24.0503	23.9795	23.2095	22.9637	22.4098	23.4416	23.5997	23.6741	22.9385	23.3275	23.0499	23.0926	23.4684	22.8337	25.0339	23.9322	26.1034	23.6909	23.5025	24.0416	24.2497	23.831	23.6242	24.4427	25.099	23.8932	23.9113	23.395	24.7517	22.9593	23.4985	24.9615	26.4057
Q9UEY8	ADDG_HUMAN	Gamma-adducin (Adducin-like protein 70)	ADD3 ADDL	15	27.3397	27.249	26.5206	25.9309	25.9717	27.0911	27.008	25.6889	26.9687	26.8497	26.6006	26.6098	26.9096	26.5652	26.5836	26.3511	25.718	26.3339	26.2665	26.3082	26.1628	26.2553	25.8918	26.0965	26.379	26.246	26.2891	27.1694	26.2773	26.5681	26.6791	26.5075	26.8576	25.5439	26.4033	26.4292	27.1137	26.5214	27.3634	26.6223	26.878	26.2579	26.6327	26.7863	28.1612
P07327	ADH1A_HUMAN	Alcohol dehydrogenase 1A (EC 1.1.1.1) (Alcohol dehydrogenase subunit alpha)	ADH1A ADH1	12	23.685	22.3404	22.6726	26.2805	23.612	23.0634	21.325	21.3303	23.2969	25.1407	20.7774	24.2396	22.1557	23.4344	20.2209	20.2369	21.4892	19.7054	22.3065	21.7765	22.162	20.5902	20.4184	21.8218	20.6927	22.5762	20.525	21.4984	24.1297	20.0264	20.756	21.1936	22.6213	24.3521	22.9518	27.9557	24.8566	21.8164	25.99	21.7479	23.4979	21.6048	21.8124	21.9611	26.3399
P00325	ADH1B_HUMAN	All-trans-retinol dehydrogenase [NAD(+)] ADH1B (EC 1.1.1.105) (Alcohol dehydrogenase 1B) (Alcohol dehydrogenase subunit beta)	ADH1B ADH2	14	24.5557	22.2944	22.6459	26.725	24.3709	23.088	22.2774	21.8393	23.8355	25.137	21.4764	25.1436	23.3116	24.1732	20.6879	20.7245	21.6961	20.1621	22.1494	22.0886	22.0349	21.033	21.1163	22.1451	21.0953	22.6904	19.7308	21.6656	25.1222	19.4096	20.7459	21.6827	22.8149	25.2357	23.1849	28.8005	25.6208	22.6727	27.091	23.4358	24.4398	22.1568	21.9745	22.1794	26.0622
P00326	ADH1G_HUMAN	Alcohol dehydrogenase 1C (EC 1.1.1.1) (Alcohol dehydrogenase subunit gamma)	ADH1C ADH3	6	23.0829	21.7402	20.2807	25.1818	22.5608	21.2054	17.722	18.2623	22.3431	19.7576	18.0901	22.9068	21.4853	22.5009	19.3758	19.0719	19.8925	16.81	19.463	20.3186	20.2556	18.9827	19.2735	18.0623	19.9039	20.3123	19.8186	20.0014	23.127	18.9747	19.874	20.8154	20.7242	23.4497	21.7236	26.8644	22.5988	20.4896	25.0124	20.3513	21.982	19.951	19.671	18.0804	25.9944
P08319	ADH4_HUMAN	All-trans-retinol dehydrogenase [NAD(+)] ADH4 (EC 1.1.1.105) (Alcohol dehydrogenase 4) (Alcohol dehydrogenase class II pi chain)	ADH4	11	26.2677	22.668	24.127	28.1434	25.3241	22.2861	25.0533	25.5813	28.4547	23.7789	25.3529	21.3433	23.246	23.3531	20.9914	21.9279	21.7607	21.428	21.6546	22.0075	21.6573	22.0631	21.7578	21.7241	21.903	22.736	23.1703	22.653	23.0884	21.7651	21.7837	21.7554	22.7865	26.171	25.0583	28.2642	22.7214	27.7823	24.3357	22.1405	25.328	26.6404	24.7939	23.3423	28.2473
P11766	ADHX_HUMAN	Alcohol dehydrogenase class-3 (EC 1.1.1.1) (Alcohol dehydrogenase 5) (Alcohol dehydrogenase class chi chain) (Alcohol dehydrogenase class-III) (Glutathione-dependent formaldehyde dehydrogenase) (FALDH) (FDH) (GSH-FDH) (EC 1.1.1.-) (S-(hydroxymethyl)glutathione dehydrogenase) (EC 1.1.1.284)	ADH5 ADHX FDH	10	28.946	29.6511	29.2199	29.5188	28.6049	29.4504	29.5625	29.392	28.6068	28.8607	28.8757	29.4934	28.2816	28.5447	29.4034	28.8339	29.3264	29.5735	29.4749	29.8922	28.8384	29.6022	29.2926	29.0853	28.9134	29.1093	29.6588	29.2928	28.2922	28.5785	28.908	29.0102	29.4488	30.183	28.9057	29.3102	29.6712	28.5646	29.59	29.1612	28.6292	28.7463	29.297	27.8807	29.3686
Q9Y2D8	ADIP_HUMAN	Afadin- and alpha-actinin-binding protein (ADIP) (Afadin DIL domain-interacting protein) (SSX2-interacting protein)	SSX2IP KIAA0923	8	24.8226	25.6622	24.8644	25.2912	26.002	25.4873	25.9654	25.8188	25.7106	25.6527	25.2648	25.3838	24.7036	25.2429	25.2023	25.4225	25.2671	25.2317	25.404	25.0435	25.6595	25.7881	25.0547	25.6234	25.7662	25.4488	25.1893	25.8003	25.2089	25.2468	25.7121	25.5423	25.1227	24.1526	25.3622	25.4627	25.3331	25.3623	24.2763	25.6948	25.4411	25.5787	25.8469	25.4888	27.0225
Q9H2P0	ADNP_HUMAN	Activity-dependent neuroprotector homeobox protein (Activity-dependent neuroprotective protein)	ADNP ADNP1 KIAA0784	1	18.0371	15.9014	19.2906	17.4722	15.3984	18.8662	19.3477	16.0272	1.3194	19.6123	18.27	17.8146	16.8972	17.3467	18.1122	17.974	15.7989	17.0528	-0.367156	15.6748	16.8546	14.5592	16.723	17.7197	16.6303	-0.301484	0.491701	14.9609	15.6414	16.0746	17.6743	17.856	19.877	0.821812	14.7296	16.1693	18.6676	16.5447	17.5856	18.524	18.5322	0.0776293	18.499	17.9156	17.4569
Q9BRR6	ADPGK_HUMAN	ADP-dependent glucokinase (ADP-GK) (ADPGK) (EC 2.7.1.147) (RbBP-35)	ADPGK PSEC0260	15	30.3681	31.5598	31.0439	30.5965	30.7032	31.3171	31.4422	31.3252	31.7248	31.1389	30.4461	30.9167	30.6382	30.4307	31.3498	31.0911	30.6478	31.2507	30.5695	30.9173	31.0741	31.0024	31.4155	31.35	31.1758	31.1173	31.1767	31.1908	30.8215	30.4886	31.1306	31.2513	32.3726	31.2109	31.658	31.1407	31.4857	30.2534	30.7902	31.7037	30.7863	30.6221	31.235	31.1753	31.7831
Q9NRN7	ADPPT_HUMAN	L-aminoadipate-semialdehyde dehydrogenase-phosphopantetheinyl transferase (EC 2.7.8.7) (4'-phosphopantetheinyl transferase) (Alpha-aminoadipic semialdehyde dehydrogenase-phosphopantetheinyl transferase) (AASD-PPT) (LYS5 ortholog)	AASDHPPT CGI-80 HAH-P HSPC223 x0005	1	21.6917	22.2247	22.1175	21.0945	20.9566	21.7368	21.5668	21.3777	20.1171	21.4118	21.7595	22.1434	22.1012	21.5583	21.8727	21.4689	21.5602	21.8755	21.645	21.5649	21.1699	21.9859	21.5439	21.3261	21.6412	21.6087	22.6293	22.3849	21.0014	21.6043	22.1834	22.0351	22.0975	21.8996	22.115	21.8517	14.9263	21.1861	22.3964	22.7478	21.0611	21.4966	21.8982	21.7453	24.8485
P54922	ADPRH_HUMAN	[Protein ADP-ribosylarginine] hydrolase (ADP-ribosylarginine hydrolase) (hARH1) (EC 3.2.2.19) (ADP-ribose-L-arginine cleaving enzyme)	ADPRH ARH1	2	21.9903	21.1102	21.0864	19.5471	19.3028	21.9575	20.3987	19.2602	19.752	21.5128	21.5204	21.8564	20.6194	20.9694	22.2952	20.5509	20.4864	21.3025	19.5229	19.4152	19.2856	19.2961	20.1114	20.5667	21.1843	20.5997	19.3896	21.8449	18.824	17.6569	21.9138	21.8997	22.2721	20.8428	21.3083	20.9989	22.3964	19.6094	22.0074	22.6585	19.155	21.2117	21.7225	17.0401	19.4334
Q9NX46	ADPRS_HUMAN	ADP-ribose glycohydrolase ARH3 (ADP-ribosylhydrolase 3) (O-acetyl-ADP-ribose deacetylase ARH3) (EC 3.5.1.-) (Poly(ADP-ribose) glycohydrolase ARH3) (EC 3.2.1.143) ([Protein ADP-ribosylarginine] hydrolase-like protein 2) ([Protein ADP-ribosylserine] hydrolase) (EC 3.2.2.-)	ADPRS ADPRHL2 ARH3	3	22.3439	22.4791	22.6316	21.6995	21.5072	23.1237	22.0456	21.6208	20.5307	22.4584	22.094	22.7849	21.7241	22.0899	22.1135	22.1761	21.3761	22.4408	21.9364	21.5576	21.6313	20.8653	21.4874	21.7955	21.9701	21.8439	21.8114	22.3575	21.5784	21.3059	22.5631	22.2653	22.917	22.2589	22.2368	21.3211	22.7012	22.423	22.4232	22.6032	21.143	21.3707	22.6123	22.0763	22.8838
Q16186	ADRM1_HUMAN	Proteasomal ubiquitin receptor ADRM1 (110 kDa cell membrane glycoprotein) (Gp110) (Adhesion-regulating molecule 1) (ARM-1) (Proteasome regulatory particle non-ATPase 13) (hRpn13) (Rpn13 homolog)	ADRM1 GP110	4	24.9876	24.9762	24.8055	24.14	23.9381	24.9377	24.7954	25.2291	24.5403	24.7504	24.5891	24.5822	24.2677	24.7747	24.8647	24.3913	24.733	24.238	24.3594	24.2788	24.3037	24.6558	24.8587	24.6931	24.4077	24.9588	25.4506	24.5395	24.3405	24.5387	24.3162	24.7602	24.9888	24.4808	24.8307	25.2781	24.7909	24.3347	25.2466	25.1683	24.018	25.2768	24.753	24.4019	24.8135
P22570	ADRO_HUMAN	NADPH:adrenodoxin oxidoreductase, mitochondrial (AR) (Adrenodoxin reductase) (EC 1.18.1.6) (Ferredoxin--NADP(+) reductase) (Ferredoxin reductase)	FDXR ADXR	4	22.8666	25.1052	24.3807	21.9056	22.9597	24.0744	24.1028	22.538	20.9493	24.5395	23.2512	23.5911	22.2319	22.0931	22.4847	23.8266	21.2713	23.8119	22.7097	22.23	22.4754	20.7754	21.7683	23.4957	22.2169	21.6891	21.4526	22.0654	23.1626	21.5435	23.2732	23.0524	25.1871	23.5108	24.0005	21.8065	24.149	24.5239	23.7906	23.1529	23.1745	22.0655	23.3457	22.5219	23.4711
Q9Y6U3	ADSV_HUMAN	Adseverin (Scinderin)	SCIN KIAA1905	5	21.3352	22.2827	21.2372	20.3633	19.8791	21.5433	22.1077	19.488	19.886	22.7732	20.7959	21.413	22.4527	22.4992	22.2265	20.7994	20.3219	21.8392	22.5479	22.757	22.6541	21.8115	23.1592	22.3602	21.7925	21.2582	20.998	22.1392	22.1385	20.8011	22.2352	23.3146	22.8737	25.8886	19.9728	19.7292	21.2233	23.0955	23.3284	21.5516	21.1805	19.9484	20.5628	21.5542	23.0052
P12235	ADT1_HUMAN	ADP/ATP translocase 1 (ADP,ATP carrier protein 1) (ADP,ATP carrier protein, heart/skeletal muscle isoform T1) (Adenine nucleotide translocator 1) (ANT 1) (Solute carrier family 25 member 4)	SLC25A4 AAC1 ANT1	27	34.0456	35.2102	35.3368	34.4949	34.2922	35.357	35.8368	34.7521	35.3913	35.3304	34.3089	34.7904	34.8655	34.8881	34.7336	35.1747	34.4823	34.9661	34.2026	34.3413	34.6557	34.8866	34.0474	35.1514	35.079	34.8908	33.9004	34.2694	35.3029	34.6347	34.4997	34.757	35.6711	34.7095	35.796	34.2013	35.3739	35.0073	34.6853	35.0654	34.9667	35.0241	35.1533	34.8393	36.0598
P05141	ADT2_HUMAN	ADP/ATP translocase 2 (ADP,ATP carrier protein 2) (ADP,ATP carrier protein, fibroblast isoform) (Adenine nucleotide translocator 2) (ANT 2) (Solute carrier family 25 member 5) [Cleaved into: ADP/ATP translocase 2, N-terminally processed]	SLC25A5 AAC2 ANT2	22	32.1528	33.5615	33.4938	32.8055	32.7333	33.4227	33.8471	32.7937	33.7732	33.5023	32.7386	32.939	33.1663	33.0557	32.8402	33.4645	32.7624	33.1906	32.8065	32.6636	32.8938	33.253	32.5103	33.4557	33.3274	32.8612	32.3527	32.9521	33.6215	32.8638	32.9555	33.0666	33.8194	33.5682	34.0208	32.6933	33.4082	33.3947	32.8325	33.4618	33.1247	33.0726	33.1454	33.4223	34.9004
P12236	ADT3_HUMAN	ADP/ATP translocase 3 (ADP,ATP carrier protein 3) (ADP,ATP carrier protein, isoform T2) (ANT 2) (Adenine nucleotide translocator 3) (ANT 3) (Solute carrier family 25 member 6) [Cleaved into: ADP/ATP translocase 3, N-terminally processed]	SLC25A6 AAC3 ANT3 CDABP0051	24	32.6795	33.8867	33.8447	33.142	33.1855	33.8481	34.2821	33.0736	34.068	33.8644	33.0767	33.308	33.764	33.6075	33.2049	33.758	33.087	33.4974	33.1289	33.1087	33.2398	33.5943	32.8158	33.8217	33.7392	33.2887	32.8263	33.1596	34.107	33.4827	33.2191	33.2579	34.2084	33.8536	34.2994	33.0152	33.847	33.972	33.0874	33.7865	33.5851	33.3828	33.5621	33.9443	35.3366
Q9H0C2	ADT4_HUMAN	ADP/ATP translocase 4 (ADP,ATP carrier protein 4) (Adenine nucleotide translocator 4) (ANT 4) (Solute carrier family 25 member 31) (Sperm flagellar energy carrier protein)	SLC25A31 AAC4 ANT4 SFEC	4	32.678	33.9575	34.0661	33.1843	32.9357	33.9532	34.5783	33.8565	34.1013	34.0542	33.1598	33.4513	33.3139	33.7485	33.5218	33.8926	33.2371	33.7442	32.9527	32.8233	33.3912	33.5188	32.662	33.9833	33.7057	33.7302	32.2684	32.7866	33.8249	32.8612	33.1481	33.7116	34.353	33.6153	34.6893	32.8986	33.9745	33.3037	33.7333	33.7708	33.7545	34.1274	33.9672	33.5037	34.1842
P10109	ADX_HUMAN	Adrenodoxin, mitochondrial (Adrenal ferredoxin) (Ferredoxin-1) (Hepatoredoxin)	FDX1 ADX	3	23.5765	25.4884	25.4446	22.0929	25.4605	24.9281	24.7546	21.979	22.5782	25.7329	25.3534	24.1956	23.281	22.8739	22.7161	24.5541	23.0206	24.6684	23.3934	22.9432	23.2669	22.5582	21.7309	24.2863	23.3905	22.7901	21.9912	24.1322	24.1906	23.5162	23.9518	24.6437	25.4638	23.7088	25.0812	21.6684	24.1953	24.7779	24.757	25.066	22.6326	22.9302	23.9191	24.291	25.9633
P55196	AFAD_HUMAN	Afadin (ALL1-fused gene from chromosome 6 protein) (Protein AF-6) (Afadin adherens junction formation factor)	AFDN AF6 MLLT4	17	26.3275	26.5292	26.8554	26.6275	26.3645	27.0952	26.8715	25.7649	26.9674	26.8881	26.7743	26.4997	26.9012	26.3343	26.4182	26.339	26.0014	26.2617	26.1187	25.8643	26.069	26.0745	25.6171	25.8863	26.6542	26.3081	25.8171	26.9424	25.3177	26.1652	25.9482	26.476	26.9033	25.8923	26.3841	25.2965	26.6854	26.6898	26.2289	26.8051	26.8597	26.0857	27.1872	25.6566	28.2636
Q8WV93	AFG1L_HUMAN	AFG1-like ATPase (Lactation elevated protein 1) (EC 3.6.-.-) (Protein AFG1 homolog)	AFG1L AFG1 LACE1	5	23.0353	23.6002	24.0077	23.2738	23.064	23.8874	23.6874	23.7382	24.1737	24.436	23.6843	23.4905	23.148	22.5872	23.5001	23.4452	24.0931	23.5643	24.0222	23.9638	23.7742	23.5312	23.3457	23.7174	23.606	23.7741	23.1451	23.4506	23.6031	22.6103	23.2197	23.4818	24.3843	23.8451	24.5012	23.3519	23.8199	23.7017	23.5685	22.9655	22.9343	23.6065	23.249	24.4873	24.6622
Q8NB90	AFG2H_HUMAN	ATPase family protein 2 homolog (EC 3.6.4.10) (Spermatogenesis-associated factor protein) (Spermatogenesis-associated protein 5)	SPATA5 AFG2 SPAF	6	22.7006	23.2773	23.723	23.0863	23.6529	23.8303	23.8609	24.8362	24.8062	23.6921	23.5313	23.3428	23.2765	23.4568	23.3426	23.6976	24.529	22.9758	23.9597	24.0453	24.2103	24.2665	23.9819	23.6089	23.5296	24.7683	24.3183	22.7152	23.6276	23.9004	22.8733	23.0189	23.7436	22.9815	24.5395	24.376	23.6327	22.6284	23.0374	23.5341	23.1931	24.1864	23.2557	23.8149	22.006
Q9Y4W6	AFG32_HUMAN	AFG3-like protein 2 (EC 3.4.24.-) (Paraplegin-like protein)	AFG3L2	32	28.6898	29.8448	30.0546	29.5395	29.5212	30.0562	30.5008	29.2234	29.9275	30.0565	29.7151	29.9805	30.1242	30.2532	29.7924	30.0809	29.4471	30.0464	29.5216	29.3885	29.7361	29.6529	29.2191	30.2542	29.9562	29.8208	28.9692	29.9414	30.3482	29.478	29.8768	29.8169	30.5073	29.5066	30.4421	28.9562	29.8005	30.1013	29.4039	29.7939	29.7556	29.3696	29.6416	30.2659	31.9475
Q6ULP2	AFTIN_HUMAN	Aftiphilin	AFTPH AFTH	2	18.7641	20.1815	18.3176	19.8419	20.8551	19.3217	17.8313	19.5137	19.8838	18.3717	20.8613	19.9188	20.2804	20.0605	19.221	20.167	22.439	18.4933	22.1215	21.3868	21.7193	21.9808	20.7	18.2166	20.8088	22.164	21.5743	20.2915	18.4294	21.4816	19.2168	18.5312	19.949	19.2524	18.5596	20.0791	20.4861	17.4153	19.1581	19.5738	19.3058	19.5569	19.2569	19.1955	18.256
Q5I7T1	AG10B_HUMAN	Putative Dol-P-Glc:Glc(2)Man(9)GlcNAc(2)-PP-Dol alpha-1,2-glucosyltransferase (EC 2.4.1.256) (Alpha-1,2-glucosyltransferase ALG10-A) (Alpha-2-glucosyltransferase ALG10-B) (Asparagine-linked glycosylation protein 10 homolog B) (Potassium channel regulator 1)	ALG10B KCR1	2	24.4722	24.863	24.7243	24.6008	24.1576	24.9791	25.5401	25.2491	25.8488	25.1418	24.0751	24.5298	24.6567	24.7892	25.1218	24.5131	24.8589	24.657	23.8704	24.6399	24.7829	24.611	25.4764	25.0937	25.1617	24.3771	24.9556	24.3347	24.5564	24.6219	24.6766	24.7867	25.5734	24.9185	25.1271	24.9035	25.4338	24.6993	24.4644	25.1569	24.5843	24.9993	25.0119	24.687	24.0526
P06280	AGAL_HUMAN	Alpha-galactosidase A (EC 3.2.1.22) (Alpha-D-galactosidase A) (Alpha-D-galactoside galactohydrolase) (Galactosylgalactosylglucosylceramidase GLA) (EC 3.2.1.47) (Melibiase) (Agalsidase)	GLA	6	23.0688	23.5931	23.833	23.3106	23.6533	24.0123	23.7903	23.6941	24.338	23.7606	24.007	23.5904	23.2779	24.2667	24.1186	24.1372	23.1537	23.5235	23.9397	24.111	23.727	24.0407	24.4904	24.3813	24.1965	23.8317	23.6443	24.276	24.2971	23.9899	24.8823	24.8051	24.7074	23.314	25.0947	23.4995	23.9379	23.7695	23.5076	23.9699	22.8389	23.7433	24.2624	24.3858	25.2038
Q9UPQ3	AGAP1_HUMAN	Arf-GAP with GTPase, ANK repeat and PH domain-containing protein 1 (AGAP-1) (Centaurin-gamma-2) (Cnt-g2) (GTP-binding and GTPase-activating protein 1) (GGAP1)	AGAP1 CENTG2 KIAA1099	2	23.0357	23.6142	23.4246	23.9604	23.5846	23.3566	23.7381	24.4949	23.9811	23.3748	23.6233	23.4098	23.6942	23.1372	23.9361	23.9597	24.3811	23.8145	23.8945	24.097	24.3662	24.8651	24.7234	23.2133	23.7514	24.9376	24.8558	23.3534	23.5269	24.3877	23.5137	22.8451	23.6696	22.9999	23.7558	23.7543	23.1846	23.6153	23.3652	23.9188	23.2721	24.3578	23.6881	23.7028	25.5894
Q96P47	AGAP3_HUMAN	Arf-GAP with GTPase, ANK repeat and PH domain-containing protein 3 (AGAP-3) (CRAM-associated GTPase) (CRAG) (Centaurin-gamma-3) (Cnt-g3) (MR1-interacting protein) (MRIP-1)	AGAP3 CENTG3	5	24.0916	24.7773	24.4574	24.8949	25.0815	24.7001	25.1381	25.841	25.5064	24.7677	24.5565	24.4868	24.4841	24.4316	25.1728	24.8247	25.6454	24.5408	24.9058	25.0793	25.6661	25.7139	25.5812	24.1057	25.0216	26.2163	25.8566	24.4713	24.0817	25.3238	24.4431	24.2232	24.8598	23.912	25.0147	25.0557	25.1171	24.4856	24.7031	24.988	24.7044	25.7165	24.8727	24.0674	26.0035
P52594	AGFG1_HUMAN	Arf-GAP domain and FG repeat-containing protein 1 (HIV-1 Rev-binding protein) (Nucleoporin-like protein RIP) (Rev-interacting protein) (Rev/Rex activation domain-binding protein)	AGFG1 HRB RAB RIP	4	23.588	23.7215	23.4377	23.1068	22.899	23.9148	22.7114	22.8385	22.8053	23.9539	23.7561	22.931	22.6922	22.4498	23.3134	23.2299	23.4157	22.2643	22.9644	22.3719	22.8579	23.4975	22.5799	22.1739	22.0692	23.212	23.2837	23.9596	21.9703	23.7531	23.5935	22.4941	23.7958	21.7599	22.9398	22.8717	23.2075	22.6135	23.3334	23.5943	22.2824	23.2872	23.766	22.8859	23.1375
Q53H12	AGK_HUMAN	Acylglycerol kinase, mitochondrial (hAGK) (EC 2.7.1.107) (EC 2.7.1.138) (EC 2.7.1.94) (Multiple substrate lipid kinase) (HsMuLK) (MuLK) (Multi-substrate lipid kinase)	AGK MULK	11	27.6109	29.3674	29.4396	28.6013	28.7982	29.5809	30.1944	28.9757	29.2025	29.5804	28.7491	29.1325	28.8956	29.0334	28.9195	29.2416	28.7208	29.1541	28.7061	28.5735	29.1011	28.5955	28.5517	29.6798	29.0197	29.0271	28.294	28.7025	29.2731	28.4457	28.8209	28.8701	30.0868	29.2245	30.185	28.5441	29.7402	28.9357	28.841	29.2121	29.1501	28.8686	29.1111	28.9346	29.8985
O95394	AGM1_HUMAN	Phosphoacetylglucosamine mutase (PAGM) (EC 5.4.2.3) (Acetylglucosamine phosphomutase) (N-acetylglucosamine-phosphate mutase) (Phosphoglucomutase-3) (PGM 3)	PGM3 AGM1	2	20.9721	22.0674	21.1024	20.1903	21.023	21.1459	21.3577	19.8794	17.3919	21.1218	21.4826	19.4864	19.7918	19.9648	19.6844	20.0833	18.8375	20.2334	18.4549	18.9716	20.1457	18.374	19.5454	18.676	20.2523	20.6156	19.8396	19.822	19.4475	19.0789	20.2712	18.3603	21.679	20.6103	21.8161	20.833	21.5311	18.9522	21.9695	21.2623	20.0506	20.919	21.0758	19.3311	20.8446
Q9UL18	AGO1_HUMAN	Protein argonaute-1 (Argonaute1) (hAgo1) (Argonaute RISC catalytic component 1) (Eukaryotic translation initiation factor 2C 1) (eIF-2C 1) (eIF2C 1) (Putative RNA-binding protein Q99)	AGO1 EIF2C1	6	25.5366	26.4037	25.1641	24.5603	25	25.6434	25.6101	24.3102	24.7583	25.5396	24.95	25.4831	24.8791	25.4967	25.4916	25.1452	24.4881	25.144	24.4658	24.0837	24.3468	24.6922	24.3619	24.8306	24.9442	24.938	24.5713	25.8457	24.1875	24.2034	25.8226	25.6525	25.3056	23.7002	24.7402	24.8637	25.3145	24.0762	25.2821	25.6929	25.6025	24.495	25.4203	24.6462	26.5811
Q9UKV8	AGO2_HUMAN	Protein argonaute-2 (Argonaute2) (hAgo2) (EC 3.1.26.n2) (Argonaute RISC catalytic component 2) (Eukaryotic translation initiation factor 2C 2) (eIF-2C 2) (eIF2C 2) (PAZ Piwi domain protein) (PPD) (Protein slicer)	AGO2 EIF2C2	3	24.6545	24.634	23.6553	23.1444	23.0957	24.3156	24.2666	22.5609	22.7616	24.35	23.8658	24.6586	24.2226	24.9334	24.5489	23.8347	23.2064	24.1772	22.9552	23.2273	23.0126	23.2543	23.1352	23.5861	23.6269	23.5747	23.6078	25.3441	23.4669	23.0871	25.1594	25.1185	23.6512	21.267	22.6717	23.5666	23.7021	23.3345	23.7879	24.5218	24.4065	22.8323	23.8269	23.1196	25.5452
Q9H9G7	AGO3_HUMAN	Protein argonaute-3 (Argonaute3) (hAgo3) (EC 3.1.26.n2) (Argonaute RISC catalytic component 3) (Eukaryotic translation initiation factor 2C 3) (eIF-2C 3) (eIF2C 3)	AGO3 EIF2C3	3	24.8819	25.9147	24.1053	23.7751	24.6344	25.0629	24.8651	23.1624	24.0828	24.6037	23.9509	24.8435	24.468	25.0515	24.637	24.0649	23.76	24.331	23.734	23.5546	23.5245	23.851	23.7093	23.9181	24.1591	24.0624	24.1408	25.5202	23.62	23.6308	25.3417	25.1686	24.3591	23.0822	23.6582	24.0994	24.4259	23.5569	24.0942	24.7743	25.0743	23.4913	24.5782	23.5261	26.4643
Q9HCK5	AGO4_HUMAN	Protein argonaute-4 (Argonaute4) (hAgo4) (Argonaute RISC catalytic component 4) (Eukaryotic translation initiation factor 2C 4) (eIF-2C 4) (eIF2C 4)	AGO4 EIF2C4 KIAA1567	2	24.4044	25.6805	23.7874	23.3458	24.4368	24.7804	24.6069	22.7415	23.9619	24.2476	23.6476	24.5836	24.1638	24.8829	24.25	23.6702	23.3293	24.0863	23.3081	23.3048	23.1716	23.4378	23.318	23.6004	23.7984	23.5319	23.7599	25.2323	23.2418	23.3827	25.1643	24.9838	24.0456	22.7727	23.2186	23.6459	24.0748	22.9857	23.625	24.2974	24.8524	23.0693	24.3203	22.8755	26.3155
P48960	AGRE5_HUMAN	Adhesion G protein-coupled receptor E5 (Leukocyte antigen CD97) (CD antigen CD97) [Cleaved into: Adhesion G protein-coupled receptor E5 subunit alpha; Adhesion G protein-coupled receptor E5 subunit beta]	ADGRE5 CD97	8	22.5676	23.1063	22.4171	22.3053	21.8739	21.6541	21.2168	21.9688	22.7038	21.907	22.009	21.6898	20.8357	21.9337	20.9161	21.5932	21.6973	21.7541	21.3771	21.8587	22.3492	20.0932	21.7841	22.1199	21.1656	20.3975	21.1727	19.8714	21.1285	21.5054	20.8127	21.8279	23.2472	26.504	21.5585	22.7692	22.7694	21.8171	22.7809	21.7601	22.2736	21.9279	22.0022	21.4885	25.316
O00468	AGRIN_HUMAN	Agrin [Cleaved into: Agrin N-terminal 110 kDa subunit; Agrin C-terminal 110 kDa subunit; Agrin C-terminal 90 kDa fragment (C90); Agrin C-terminal 22 kDa fragment (C22)]	AGRN AGRIN	20	23.894	23.3603	23.6951	23.5886	24.2161	24.615	25.0923	23.1888	23.6203	23.3096	24.4799	23.9231	25.3201	24.2091	24.43	23.5294	23.6043	24.7635	24.2219	23.9206	24.6624	23.6504	23.1746	24.8374	23.718	23.8144	23.1646	26.439	24.1375	23.5181	24.1451	24.278	23.0832	25.0635	23.6667	23.3532	23.1659	23.5708	23.1425	23.552	24.0195	23.2054	24.0119	24.356	25.7702
Q09666	AHNK_HUMAN	Neuroblast differentiation-associated protein AHNAK (Desmoyokin)	AHNAK PM227	156	32.3038	29.5109	29.2258	29.3076	30.3072	29.2878	28.3973	28.7776	28.9438	28.9494	29.452	30.3371	30.0131	31.1757	29.1134	28.6588	28.4099	29.7212	29.1717	29.4971	28.6462	28.9468	29.0076	29.1582	28.706	28.3259	28.9386	30.4952	30.5585	29.3113	29.32	29.4041	29.0407	31.856	28.7545	29.7077	31.1175	30.6402	32.4057	29.1081	30.085	28.8917	28.9199	29.0525	31.8981
Q8IVF2	AHNK2_HUMAN	Protein AHNAK2	AHNAK2 C14orf78 KIAA2019	4	23.9623	24.1299	24.0053	22.9517	23.0202	23.9302	23.817	24.1717	24.9015	23.5788	24.0393	23.491	22.6567	23.0448	23.6209	23.7764	23.5477	23.4186	23.3268	22.7849	23.3344	23.1087	23.2123	22.8713	22.4922	23.3651	22.4432	23.0908	24.1919	22.8442	23.0416	23.5203	24.7654	23.0362	23.8299	23.6925	24.1816	21.6222	24.1791	23.6849	23.143	23.6194	22.8667	22.7144	23.4165
O95433	AHSA1_HUMAN	Activator of 90 kDa heat shock protein ATPase homolog 1 (AHA1) (p38)	AHSA1 C14orf3 HSPC322	6	25.2014	26.4855	25.5914	25.4215	26.3875	26.0497	26.0863	25.8497	25.9913	26.1713	25.5105	25.4661	25.4672	26.1482	25.4573	25.3452	25.8025	24.7009	26.5	25.1698	25.3987	25.6431	25.3062	25.2044	25.2872	26.3362	25.8658	25.3762	24.1786	25.5919	24.9213	25.203	26.4432	26.7298	26.0247	26.4362	26.2629	24.4249	26.1625	25.8544	24.8985	25.9224	25.9942	24.5492	24.3278
Q96BJ3	AIDA_HUMAN	Axin interactor, dorsalization-associated protein (Axin interaction partner and dorsalization antagonist)	AIDA C1orf80	2	23.642	24.8149	24.0456	22.8962	23.192	23.8971	24.0892	24.0812	24.3075	24.0307	23.2271	23.8036	22.5742	22.6993	23.7788	23.5583	23.309	23.7923	23.7952	23.5089	23.3606	24.2702	23.2037	23.1987	22.9619	23.6202	24.4634	23.6247	22.3934	23.2847	23.9811	24.2199	24.7558	24.0165	24.4564	23.8588	24.4226	22.8278	24.8502	24.6853	23.1388	23.7117	23.7578	22.2754	23.2903
O95831	AIFM1_HUMAN	Apoptosis-inducing factor 1, mitochondrial (EC 1.6.99.-) (Programmed cell death protein 8)	AIFM1 AIF PDCD8	32	31.6745	33.3401	33.4825	32.1835	32.6378	33.3931	33.8357	32.3898	32.6785	33.5726	32.7067	32.8533	32.756	32.6146	32.7733	33.141	32.0595	33.2448	32.0608	31.8903	32.3931	32.2107	31.9058	33.0944	32.5607	32.6382	31.3982	32.6997	33.146	32.1777	32.66	32.8482	33.8081	31.4421	33.8422	31.2718	33.1016	32.7532	32.5981	32.9848	32.6128	31.9477	32.7302	33.1939	33.8989
Q96NN9	AIFM3_HUMAN	Apoptosis-inducing factor 3 (EC 1.-.-.-) (Apoptosis-inducing factor-like protein)	AIFM3 AIFL	2	22.3556	21.9532	21.781	21.6703	21.546	21.8281	21.697	21.9353	22.2145	21.9852	21.823	21.3661	22.8146	22.4786	21.7783	21.4145	21.313	22.1317	21.4704	21.6567	22.0842	21.7706	21.6169	22.1825	21.7597	21.5651	21.8988	23.0784	21.8694	21.4491	21.8253	22.4562	21.9447	21.1995	20.5634	21.6411	21.9651	21.8362	21.6153	21.7684	21.6721	21.5667	21.866	21.8402	22.9636
Q9NVV5	AIG1_HUMAN	Androgen-induced gene 1 protein (AIG-1) (Fatty acid esters of hydroxy fatty acids hydrolase AIG1) (FAHFA hydrolase AIG1) (EC 3.1.-.-)	AIG1 CGI-103	1	22.7881	23.4301	23.1241	22.9744	22.5812	23.4588	23.4793	23.2903	23.2746	22.9585	22.7344	23.054	23.4065	23.4582	23.0918	22.989	23.7429	22.3933	22.8444	23.3372	23.3378	23.9344	23.4168	22.8859	23.2371	22.9695	24.2892	23.0435	22.7898	23.0331	22.7641	22.687	23.019	22.8902	23.0245	23.5456	23.6955	22.8696	22.9156	23.8648	23.0179	23.4124	23.3954	22.6394	22.3294
Q12904	AIMP1_HUMAN	Aminoacyl tRNA synthase complex-interacting multifunctional protein 1 (Multisynthase complex auxiliary component p43) [Cleaved into: Endothelial monocyte-activating polypeptide 2 (EMAP-2) (Endothelial monocyte-activating polypeptide II) (EMAP-II) (Small inducible cytokine subfamily E member 1)]	AIMP1 EMAP2 SCYE1	14	29.0162	29.8932	29.7191	28.8918	29.0218	29.8577	29.8121	28.7884	28.8112	29.9433	28.9225	29.3397	29.2767	29.4776	29.3745	28.8973	29.084	29.3836	28.6486	28.3995	28.9972	28.9047	27.9864	28.971	28.9617	28.907	28.7361	30.0437	28.0818	28.0073	29.47	29.9798	30.1042	27.7647	27.9885	29.3116	29.848	29.6102	29.118	29.7314	29.1839	28.49	29.2632	28.0052	29.8424
Q13155	AIMP2_HUMAN	Aminoacyl tRNA synthase complex-interacting multifunctional protein 2 (Multisynthase complex auxiliary component p38) (Protein JTV-1)	AIMP2 JTV1 PRO0992	7	27.2435	28.1673	28.0846	26.7447	26.5412	28.0116	28.055	27.0214	26.8479	28.6469	27.3289	27.288	27.0363	27.4083	27.2095	27.1478	27.373	27.3407	26.8629	26.6178	27.0819	26.9985	26.1798	27.0592	27.0316	26.938	27.1329	27.8705	26.0673	26.1632	27.369	28.0078	28.805	26.0409	27.0457	27.7237	28.3768	27.4835	27.6276	27.879	27.3701	27.0464	27.5594	25.8765	28.1919
Q16352	AINX_HUMAN	Alpha-internexin (Alpha-Inx) (66 kDa neurofilament protein) (NF-66) (Neurofilament-66) (Neurofilament 5)	INA NEF5	10	23.2453	23.3297	23.3429	23.1909	22.2962	23.451	23.1622	23.2999	23.666	23.0206	23.0855	22.8291	23.9589	25.9212	23.0544	23.0495	22.9762	25.193	25.3784	23.2357	22.9765	23.6634	23.2289	22.5162	22.4864	22.4521	24.1353	23.531	26.9693	23.0723	22.6264	23.3387	23.1472	24.1293	25.5826	24.1488	23.7258	22.8192	23.3558	23.3094	23.0241	23.3113	23.0464	25.044	27.1245
O00170	AIP_HUMAN	AH receptor-interacting protein (AIP) (Aryl-hydrocarbon receptor-interacting protein) (HBV X-associated protein 2) (XAP-2) (Immunophilin homolog ARA9)	AIP XAP2	11	25.6964	25.6648	25.5078	26.31	26.6809	25.7783	26.1365	26.6267	26.4209	25.7784	26.261	25.8281	26.1753	25.7051	26.1244	25.3241	27.3658	25.5697	27.1309	27.0593	26.8019	27.7986	26.8103	25.3376	25.9205	27.3055	27.8259	26.2777	25.1492	27.5308	25.7551	25.7588	26.057	26.8342	25.8966	27.1252	26.2269	25.6229	26.1751	26.7592	25.7388	27.1065	25.7029	25.142	27.3702
Q9NZN9	AIPL1_HUMAN	Aryl-hydrocarbon-interacting protein-like 1	AIPL1 AIPL2	9	23.5998	24.4343	23.6717	23.7117	23.3898	23.7363	23.4671	24.0216	24.6422	23.2635	23.4194	22.4388	23.6551	22.0476	22.2175	22.3288	23.1832	22.4848	25.1204	22.9998	23.7425	21.6053	22.2481	22.235	21.8869	23.0044	23.0714	22.576	22.6121	22.394	22.8959	23.122	24.1499	26.7558	26.1775	23.388	24.4841	23.1501	23.1951	23.6343	22.4662	22.2794	23.0848	25.0963	24.1679
P14550	AK1A1_HUMAN	Aldo-keto reductase family 1 member A1 (EC 1.1.1.2) (EC 1.1.1.372) (EC 1.1.1.54) (Alcohol dehydrogenase [NADP(+)]) (Aldehyde reductase) (Glucuronate reductase) (EC 1.1.1.19) (Glucuronolactone reductase) (EC 1.1.1.20)	AKR1A1 ALDR1 ALR	12	27.5073	28.7117	27.5558	26.6945	26.8013	27.6344	27.2625	26.3871	27.6646	27.2544	27.5023	27.6859	26.7426	27.0663	27.5178	27.3222	27.9825	27.3589	26.9335	27.0707	26.7741	26.9977	26.9069	27.1999	27.1621	27.0018	27.3596	27.9737	26.4701	26.6296	27.9853	27.5065	27.5021	27.9258	27.0491	28.0172	27.9774	26.9119	28.0555	28.4145	26.5522	27.1814	27.452	27.4508	28.7954
P42330	AK1C3_HUMAN	Aldo-keto reductase family 1 member C3 (EC 1.1.1.-) (EC 1.1.1.210) (EC 1.1.1.53) (EC 1.1.1.62) (17-beta-hydroxysteroid dehydrogenase type 5) (17-beta-HSD 5) (3-alpha-HSD type II, brain) (3-alpha-hydroxysteroid dehydrogenase type 2) (3-alpha-HSD type 2) (EC 1.1.1.357) (Chlordecone reductase homolog HAKRb) (Dihydrodiol dehydrogenase 3) (DD-3) (DD3) (Dihydrodiol dehydrogenase type I) (HA1753) (Prost…	AKR1C3 DDH1 HSD17B5 KIAA0119 PGFS	1	19.2331	20.1747	19.3613	19.2179	19.92	20.3266	17.8302	19.7423	16.0899	19.9381	20.3544	19.8643	20.1894	19.5993	19.5067	19.9067	19.5353	18.2403	18.9341	19.1651	18.9952	17.5515	20.1136	19.0229	19.9047	19.9979	21.0767	20.0586	18.3311	17.1478	19.4569	19.893	20.6308	19.0148	18.5383	20.3462	20.2213	18.4493	20.6206	18.8715	18.9501	19.8226	19.2591	19.1108	21.9485
O43572	AKA10_HUMAN	A-kinase anchor protein 10, mitochondrial (AKAP-10) (Dual specificity A kinase-anchoring protein 2) (D-AKAP-2) (Protein kinase A-anchoring protein 10) (PRKA10)	AKAP10	12	23.7882	24.6007	24.4209	24.7964	25.6818	24.5254	25.0498	26.132	25.6405	25.0892	24.4101	24.4286	24.229	24.0238	24.8848	24.5866	26.3557	23.97	26.2139	25.8303	26.2844	26.2481	25.9103	24.0674	24.8768	26.5246	26.6685	24.9694	23.6741	25.4504	24.3615	24.8008	24.9887	24.7631	24.8487	25.8231	24.8966	23.1365	24.2733	24.849	24.7594	26.2465	24.4517	24.2554	25.602
Q02952	AKA12_HUMAN	A-kinase anchor protein 12 (AKAP-12) (A-kinase anchor protein 250 kDa) (AKAP 250) (Gravin) (Myasthenia gravis autoantigen)	AKAP12 AKAP250	61	31.1622	28.3048	27.3254	27.0235	28.9185	27.9561	26.9175	26.9282	27.2472	27.3759	28.3138	28.7091	28.4793	29.5899	27.0982	27.2118	25.6948	27.6179	26.8431	27.4898	26.337	26.4624	27.1176	27.4064	26.9532	26.1096	26.8323	28.8929	28.617	27.6511	27.3378	27.8666	27.8621	28.2275	27.382	29.0054	29.9518	28.7556	31.027	28.006	29.2311	27.1428	27.8152	28.4417	30.6513
Q9Y2D5	AKAP2_HUMAN	A-kinase anchor protein 2 (AKAP-2) (AKAP-KL) (Protein kinase A-anchoring protein 2) (PRKA2)	AKAP2 KIAA0920 PRKA2	8	23.9229	23.5374	23.2943	23.0376	23.3859	23.8509	23.9488	20.5913	21.9407	24.9718	24.2507	23.806	24.0016	25.024	23.9146	23.0134	20.1545	23.7089	21.1095	21.6467	21.3423	21.0806	20.7867	22.8565	22.7477	23.1964	21.3496	24.292	22.3209	22.6147	24.4399	23.969	23.3837	22.0428	22.4218	20.0946	23.0365	23.6806	23.934	22.9614	24.2543	22.447	23.2195	22.0097	26.0862
P24588	AKAP5_HUMAN	A-kinase anchor protein 5 (AKAP-5) (A-kinase anchor protein 79 kDa) (AKAP 79) (H21) (cAMP-dependent protein kinase regulatory subunit II high affinity-binding protein)	AKAP5 AKAP79	1	18.8006	18.7744	17.6576	16.7783	15.7083	18.3472	17.7412	16.3405	19.4562	18.4247	16.9955	18.4556	19.1387	17.7767	18.902	17.5388	17.3932	19.164	15.673	16.2808	16.7747	16.8022	12.8365	17.3698	18.3003	17.252	16.8884	19.8229	17.0619	18.4552	19.6952	19.8127	17.5051	0.821812	17.3304	15.4921	18.2755	17.7105	18.3368	19.4692	17.8192	0.0776293	17.963	16.3133	21.2143
Q13023	AKAP6_HUMAN	A-kinase anchor protein 6 (AKAP-6) (A-kinase anchor protein 100 kDa) (AKAP 100) (Protein kinase A-anchoring protein 6) (PRKA6) (mAKAP)	AKAP6 AKAP100 KIAA0311	5	22.8939	22.7377	22.359	24.0764	24.6985	22.934	23.4184	24.2983	25.3884	23.0336	23.9661	23.3587	22.9471	23.0309	23.3226	23.2419	23.1159	23.2619	24.1664	23.9934	24.2476	23.0839	23.4988	23.7141	23.5633	24.1304	24.0508	24.2839	23.6269	23.7584	22.7239	21.6319	22.8183	22.0952	22.8644	22.1824	24.5467	24.6081	21.793	23.7081	23.3101	24.1	22.8889	23.7673	23.7084
Q99996	AKAP9_HUMAN	A-kinase anchor protein 9 (AKAP-9) (A-kinase anchor protein 350 kDa) (AKAP 350) (hgAKAP 350) (A-kinase anchor protein 450 kDa) (AKAP 450) (AKAP 120-like protein) (Centrosome- and Golgi-localized PKN-associated protein) (CG-NAP) (Protein hyperion) (Protein kinase A-anchoring protein 9) (PRKA9) (Protein yotiao)	AKAP9 AKAP350 AKAP450 KIAA0803	29	25.6826	26.2304	25.6959	26.2338	26.6494	26.3189	26.2494	26.7569	26.6372	26.2429	25.9652	26.106	26.3716	26.2475	26.1272	25.8583	26.9417	26.023	27.2213	26.7505	27.1063	27.1866	26.6496	26.255	26.5019	27.1498	27.1181	26.9768	25.9799	27.0194	26.2846	26.4294	26.5762	25.598	26.1443	26.3995	26.6613	26.0983	25.7156	25.9552	26.0655	26.6245	25.9262	26.4294	28.3693
Q9P2G1	AKIB1_HUMAN	Ankyrin repeat and IBR domain-containing protein 1 (EC 2.3.2.31)	ANKIB1 KIAA1386	7	23.9998	24.4338	23.8472	24.379	24.3864	24.1935	24.5976	24.6199	24.8054	24.553	24.3298	24.743	24.2876	24.3437	24.8451	24.7004	25.0225	24.7535	25.0787	24.7289	24.8239	24.9733	24.6117	24.8769	24.6016	25.1363	24.933	24.9463	24.823	24.6975	24.7175	24.705	24.4586	23.8563	24.3211	24.0287	23.9886	23.9945	23.6164	24.5611	24.2736	24.5072	24.2154	24.7043	25.5343
P31749	AKT1_HUMAN	RAC-alpha serine/threonine-protein kinase (EC 2.7.11.1) (Protein kinase B) (PKB) (Protein kinase B alpha) (PKB alpha) (Proto-oncogene c-Akt) (RAC-PK-alpha)	AKT1 PKB RAC	7	23.6708	23.8027	23.0719	23.5392	24.448	22.7718	23.9757	24.7671	25.0671	23.3453	23.3426	23.0441	23.4095	23.1839	23.4362	22.347	24.6917	23.0835	24.7752	24.6726	24.6802	24.893	24.7584	22.8437	24.0058	24.9795	25.4481	23.756	22.8102	24.9629	23.3026	22.1512	23.4774	25.0314	23.549	24.5797	23.8617	23.4676	23.7804	24.0019	23.3329	24.8041	23.4374	23.0813	23.0421
P31751	AKT2_HUMAN	RAC-beta serine/threonine-protein kinase (EC 2.7.11.1) (Protein kinase Akt-2) (Protein kinase B beta) (PKB beta) (RAC-PK-beta)	AKT2	11	25.6417	26.0662	25.4373	25.5524	25.412	25.6865	25.8725	26.3718	26.3665	25.6255	25.2405	25.4437	25.4773	25.405	25.6819	24.885	26.292	25.2932	25.9991	26.1563	26.25	26.6454	25.9954	24.9029	25.7206	26.5088	26.9202	26.0991	24.3419	26.2424	25.4999	25.5115	25.5694	26.0053	25.3458	26.3177	25.9869	24.9074	25.9354	26.3607	25.2832	26.2674	25.9329	24.6628	25.5265
Q9Y243	AKT3_HUMAN	RAC-gamma serine/threonine-protein kinase (EC 2.7.11.1) (Protein kinase Akt-3) (Protein kinase B gamma) (PKB gamma) (RAC-PK-gamma) (STK-2)	AKT3 PKBG	2	21.1117	20.5444	19.6865	21.1448	20.8609	20.7078	20.6056	21.3385	21.3195	20.5377	18.9348	21.703	21.6615	20.5294	21.6588	20.8463	22.9337	21.7925	23.3613	23.0226	22.84	23.0023	22.6462	20.8641	22.1976	23.2449	23.6658	22.6188	20.4608	22.9475	21.9884	20.0824	21.6521	21.7877	20.2132	21.1799	20.6395	20.1352	20.6382	21.2128	21.0886	21.7235	20.2861	20.5234	21.6962
Q9H8T0	AKTIP_HUMAN	AKT-interacting protein (Ft1) (Fused toes protein homolog)	AKTIP FTS	2	22.2821	21.6395	22.468	22.4761	23.1678	22.0838	22.2862	22.1268	22.4367	22.1608	22.435	21.701	23.5629	23.7366	21.9236	21.9786	22.932	21.4735	21.7295	21.6699	22.0751	21.8079	21.6342	22.0249	21.9913	22.8688	22.8544	21.7207	23.2599	23.272	21.4917	21.7176	22.1536	20.9857	22.1729	21.6145	21.8563	23.9539	22.4515	22.2904	22.2909	22.9958	21.8208	21.2174	26.3958
Q96B36	AKTS1_HUMAN	Proline-rich AKT1 substrate 1 (40 kDa proline-rich AKT substrate)	AKT1S1 PRAS40	2	22.4461	22.7464	22.7117	22.0006	22.6417	22.6002	22.4333	21.5809	22.7902	22.5429	23.1254	22.1302	21.8446	21.6635	22.348	21.8039	21.3638	22.1088	21.6375	21.1412	21.4225	21.2549	21.1446	21.9329	21.8096	21.9792	21.1055	22.3142	21.058	21.5547	21.9329	22.2134	23.2073	20.4375	21.9105	21.55	23.0602	21.1627	22.8131	22.6079	21.6225	22.273	22.4117	20.9766	22.3856
P00352	AL1A1_HUMAN	Retinal dehydrogenase 1 (RALDH 1) (RalDH1) (EC 1.2.1.-) (EC 1.2.1.36) (ALDH-E1) (ALHDII) (Aldehyde dehydrogenase family 1 member A1) (Aldehyde dehydrogenase, cytosolic)	ALDH1A1 ALDC ALDH1 PUMB1	15	27.9797	27.9446	26.9767	26.6737	26.8997	27.3787	27.5138	26.5899	26.1427	27.4011	26.6707	27.3949	26.5855	27.6468	27.3019	26.7474	26.2397	27.5277	26.5534	26.6689	27.0664	26.1601	27.0968	27.218	27.0765	27.0034	26.639	27.0632	27.2498	26.9047	27.5231	26.9438	27.8645	28.7607	27.5448	27.1758	27.9247	27.1799	29.1417	26.656	27.283	25.4672	27.2028	27.3475	28.1444
O94788	AL1A2_HUMAN	Retinal dehydrogenase 2 (RALDH 2) (RalDH2) (EC 1.2.1.36) (Aldehyde dehydrogenase family 1 member A2) (Retinaldehyde-specific dehydrogenase type 2) (RALDH(II))	ALDH1A2 RALDH2	12	25.7611	22.9991	22.5019	22.6605	23.3488	22.2481	22.6011	21.9517	24.6321	22.8333	22.7722	22.8603	21.9042	23.6903	21.8351	21.2023	21.542	22.0042	21.0523	21.6548	21.7523	21.4741	22.27	22.3608	22.2742	21.8654	21.5916	21.7339	23.7486	21.8991	21.3238	22.3459	22.6836	22.7196	21.9651	24.3047	25.1613	23.477	27.2117	22.913	24.3975	23.0748	22.841	21.4598	23.901
P47895	AL1A3_HUMAN	Aldehyde dehydrogenase family 1 member A3 (EC 1.2.1.36) (Aldehyde dehydrogenase 6) (Retinaldehyde dehydrogenase 3) (RALDH-3) (RalDH3)	ALDH1A3 ALDH6	18	29.5124	29.9452	29.5364	29.1347	28.8898	30.4677	29.472	29.6581	30.0016	28.8703	29.5754	30.1542	28.6563	29.5035	29.9028	29.7978	30.0207	29.471	29.1531	29.6857	29.8531	30.3617	30.5093	29.7218	29.621	29.8028	30.7671	30.3155	28.7654	28.5912	29.7765	29.8539	30.1633	29.3862	30.0538	29.6457	29.3364	28.0967	30.0642	30.0932	29.1722	30.147	30.6609	29.1775	29.3009
P30837	AL1B1_HUMAN	Aldehyde dehydrogenase X, mitochondrial (EC 1.2.1.3) (Aldehyde dehydrogenase 5) (Aldehyde dehydrogenase family 1 member B1)	ALDH1B1 ALDH5 ALDHX	7	24.1517	24.9525	25.7968	24.0249	23.978	25.2333	25.3164	23.9648	25.2418	25.5484	22.6995	24.8526	24.0642	24.1404	24.4776	24.8874	24.0146	25.4166	24.4787	25.248	23.8147	24.2727	24.0823	24.7721	22.7901	23.6795	25.338	23.8434	25.071	24.6893	24.5042	23.6399	26.1553	26.0154	24.9033	23.5654	24.4884	23.4125	25.153	24.3157	24.4296	23.0628	24.5604	24.5482	24.9682
O75891	AL1L1_HUMAN	Cytosolic 10-formyltetrahydrofolate dehydrogenase (10-FTHFDH) (FDH) (EC 1.5.1.6) (Aldehyde dehydrogenase family 1 member L1)	ALDH1L1 FTHFD	16	27.0804	26.7977	26.8008	25.9989	25.9768	27.4262	27.1094	27.529	26.7522	27.3642	26.7417	26.5914	26.2127	26.9559	27.1255	26.5353	26.648	26.6519	25.9411	27.0338	26.8374	27.1909	26.8611	27.0165	26.4613	26.8093	26.9913	26.9263	26.4318	25.6136	26.9047	27.8372	28.5498	26.2342	26.5505	27.2335	28.5199	25.6358	27.9201	27.8789	26.009	26.2649	27.2845	26.0835	27.6
Q3SY69	AL1L2_HUMAN	Mitochondrial 10-formyltetrahydrofolate dehydrogenase (Mitochondrial 10-FTHFDH) (mtFDH) (EC 1.5.1.6) (Aldehyde dehydrogenase family 1 member L2)	ALDH1L2	1	17.384	-0.13944	16.6334	21.0819	16.9826	-0.278166	-0.37337	-0.29238	1.3194	-0.565216	17.5089	16.9515	0.206656	0.860058	-0.313836	0.0508134	19.0538	16.5838	13.3163	18.8435	17.0071	0.0344352	-0.392884	14.6668	13.4747	-0.301484	0.491701	15.3805	17.852	0.936853	0.120698	-0.320662	16.6112	19.1414	-0.25646	15.556	18.3313	18.3399	19.2261	-0.539827	15.6121	0.0776293	15.9776	15.4633	16.0345
P51648	AL3A2_HUMAN	Aldehyde dehydrogenase family 3 member A2 (EC 1.2.1.3) (EC 1.2.1.94) (Aldehyde dehydrogenase 10) (Fatty aldehyde dehydrogenase) (Microsomal aldehyde dehydrogenase)	ALDH3A2 ALDH10 FALDH	23	30.6938	31.9333	31.4171	31.1237	31.0326	31.6939	31.9875	31.6659	31.9615	31.6487	30.7465	31.6268	31.2395	31.4729	31.5197	31.5195	31.1397	31.6217	31.5298	31.3218	31.3806	31.6271	31.6422	31.7303	31.459	31.4429	31.3779	31.5859	31.6343	31.2208	31.5126	31.2238	32.4662	31.1889	31.3963	31.5915	31.8579	31.4892	30.9827	31.4194	31.4502	30.9692	31.4726	31.7074	32.433
P43353	AL3B1_HUMAN	Aldehyde dehydrogenase family 3 member B1 (EC 1.2.1.28) (EC 1.2.1.5) (EC 1.2.1.7) (Aldehyde dehydrogenase 7)	ALDH3B1 ALDH7	5	24.0133	25.1198	24.4997	24.6046	24.4142	25.15	24.743	24.8352	25.4689	25.1117	23.4713	24.854	24.9322	24.6474	24.3491	24.6019	24.9164	24.6078	24.4337	24.4443	24.1222	24.7587	25.1587	24.9019	25.1182	24.3352	24.4673	24.9786	25.2691	25.116	24.6717	24.0398	25.6092	25.3396	24.0128	24.3438	24.6009	25.2972	23.9753	24.1714	24.4156	23.9401	25.0432	25.093	24.6898
P48448	AL3B2_HUMAN	Aldehyde dehydrogenase family 3 member B2 (EC 1.2.1.3) (Aldehyde dehydrogenase 8)	ALDH3B2 ALDH8	2	23.5596	24.3515	24.0062	23.9784	23.4779	24.2336	24.5688	24.1416	25.3098	24.1671	23.321	24.3253	24.0973	24.3602	24.1626	24.2088	23.803	24.355	24.3038	24.1965	23.8882	24.5696	24.3584	24.3058	24.3886	24.1073	24.3285	24.5647	24.6275	24.0936	23.9675	23.6187	24.784	24.5219	23.8315	24.1854	24.4404	24.429	23.5911	24.0157	24.2062	23.5183	24.0548	24.4881	24.2123
P30038	AL4A1_HUMAN	Delta-1-pyrroline-5-carboxylate dehydrogenase, mitochondrial (P5C dehydrogenase) (EC 1.2.1.88) (Aldehyde dehydrogenase family 4 member A1) (L-glutamate gamma-semialdehyde dehydrogenase)	ALDH4A1 ALDH4 P5CDH	26	31.2851	32.5628	32.5803	31.358	31.8233	32.4143	32.4788	30.9275	31.27	32.876	31.6967	31.5758	31.2106	31.3608	30.5482	32.323	30.011	32.0478	29.9788	30.7691	30.7232	30.115	30.6432	31.7385	30.6455	31.2202	31.0536	31.2352	31.7221	30.981	31.4642	31.7867	33.1067	29.2471	32.4405	29.7	31.993	32.6899	31.814	31.943	31.5724	30.3837	31.7351	31.4426	33.3429
P20292	AL5AP_HUMAN	Arachidonate 5-lipoxygenase-activating protein (FLAP) (MK-886-binding protein)	ALOX5AP FLAP	2	22.1413	21.6144	20.0391	21.096	21.2949	20.3122	19.6347	19.3565	20.7631	18.4144	20.9163	20.2934	22.2779	22.1382	20.7663	20.008	19.0881	21.2346	22.938	22.6607	19.8108	20.7102	20.5123	19.9962	20.6402	20.4255	20.266	21.2196	22.3858	20.6008	20.5241	21.2623	20.3155	27.6294	20.4794	21.491	21.389	22.4825	21.8595	19.9434	21.7733	20.0405	19.9353	22.133	24.2849
P49419	AL7A1_HUMAN	Alpha-aminoadipic semialdehyde dehydrogenase (Alpha-AASA dehydrogenase) (EC 1.2.1.31) (Aldehyde dehydrogenase family 7 member A1) (EC 1.2.1.3) (Antiquitin-1) (Betaine aldehyde dehydrogenase) (EC 1.2.1.8) (Delta1-piperideine-6-carboxylate dehydrogenase) (P6c dehydrogenase)	ALDH7A1 ATQ1	26	31.0169	32.3379	32.3327	30.3769	31.4689	32.1318	32.4188	30.3908	31.5261	32.5674	31.4742	31.8713	31.3569	31.0453	31.2128	31.9757	30.4271	31.981	30.2003	30.3642	31.0394	30.6418	30.0014	31.7303	31.051	30.2553	30.397	31.5258	31.481	30.6107	31.9309	31.4904	32.7395	29.8933	32.1209	30.4369	31.8569	31.8197	31.9094	31.3822	31.2217	30.49	31.5354	31.4456	33.0746
P49189	AL9A1_HUMAN	4-trimethylaminobutyraldehyde dehydrogenase (TMABA-DH) (TMABALDH) (EC 1.2.1.47) (Aldehyde dehydrogenase E3 isozyme) (Aldehyde dehydrogenase family 9 member A1) (EC 1.2.1.3) (Gamma-aminobutyraldehyde dehydrogenase) (EC 1.2.1.19) (R-aminobutyraldehyde dehydrogenase) [Cleaved into: 4-trimethylaminobutyraldehyde dehydrogenase, N-terminally processed]	ALDH9A1 ALDH4 ALDH7 ALDH9	28	31.9477	32.8494	33.1128	30.8024	31.4991	32.6961	32.9361	31.149	31.2782	32.8692	31.8832	32.5382	31.8219	31.5812	31.8669	32.7929	31.0586	32.2518	30.7987	31.3831	31.6176	31.1692	30.9989	32.254	31.3643	31.6291	30.8895	32.6937	31.931	30.4266	32.1549	32.1672	32.7743	30.4137	32.1232	31.5651	32.1649	32.0505	32.8135	32.3956	31.659	31.1023	32.1927	31.7296	33.2077
P02768	ALBU_HUMAN	Albumin	ALB GIG20 GIG42 PRO0903 PRO1708 PRO2044 PRO2619 PRO2675 UNQ696/PRO1341	50	33.2231	32.7243	31.5562	32.2179	32.0715	32.6702	31.7759	33.0795	32.6763	32.0516	32.5688	32.4955	32.7655	33.0917	33.0363	33.5378	32.7178	33.4114	33.2093	33.3033	33.2078	32.622	33.3254	32.6986	32.7306	31.8296	32.6676	31.9617	33.6221	31.4402	33.263	32.0347	33.562	35.0533	33.0125	34.4578	32.7273	32.9696	33.8154	32.8843	32.4326	32.4475	32.3934	32.6902	34.3485
P05091	ALDH2_HUMAN	Aldehyde dehydrogenase, mitochondrial (EC 1.2.1.3) (ALDH class 2) (ALDH-E2) (ALDHI)	ALDH2 ALDM	28	31.7629	33.2752	32.9465	30.9982	32.2694	32.7426	32.8592	31.4045	31.287	33.3457	32.036	32.2432	31.6446	31.8855	32.0451	32.7177	30.9137	32.8695	30.8582	31.1861	31.523	31.0025	31.1591	32.9944	31.169	30.9369	30.3426	32.1128	32.5187	31.1541	32.4409	32.4572	33.6307	31.1347	32.892	30.5245	32.1716	32.7897	32.3964	32.6476	31.5547	31.2409	32.142	31.7514	33.3254
P04075	ALDOA_HUMAN	Fructose-bisphosphate aldolase A (EC 4.1.2.13) (Lung cancer antigen NY-LU-1) (Muscle-type aldolase)	ALDOA ALDA	24	31.478	32.1371	31.6275	30.6509	30.0624	31.2596	31.1011	30.6987	30.2088	31.0452	31.3521	31.3054	30.4856	30.6866	31.632	30.9378	30.258	31.132	29.9999	30.7625	30.6965	30.3153	30.7901	31.1755	30.9443	30.4951	30.0617	31.7849	30.0352	30.1223	31.2747	31.58	31.2968	30.3497	30.6806	31.4363	32.0767	30.6697	32.2784	32.2382	30.4161	30.9399	31.209	30.3772	31.974
P09972	ALDOC_HUMAN	Fructose-bisphosphate aldolase C (EC 4.1.2.13) (Brain-type aldolase)	ALDOC ALDC	18	30.1579	30.8271	30.56	29.7047	29.0726	30.3577	30.3492	30.1299	29.2212	30.3799	30.481	30.1822	29.3696	29.8974	30.5778	29.5692	29.4625	29.8371	29.7973	29.4776	29.967	29.2584	29.8643	30.2631	30.0063	30.1445	29.4526	30.8617	29.0116	28.8275	30.7419	30.3342	30.3318	29.9271	30.1066	30.4115	30.8917	29.4772	31.2696	31.0104	29.5479	29.8608	30.2682	29.8783	30.4498
P15121	ALDR_HUMAN	Aldo-keto reductase family 1 member B1 (EC 1.1.1.300) (EC 1.1.1.372) (EC 1.1.1.54) (Aldehyde reductase) (Aldose reductase) (AR) (EC 1.1.1.21)	AKR1B1 ALDR1 ALR2	7	26.0298	26.3829	26.1832	24.3401	25.2632	25.8083	25.6302	24.6561	24.3222	25.8775	25.8306	26.1924	24.7453	25.4118	26.1889	25.5151	24.7286	25.8699	25.2834	25.1317	25.0334	24.7653	25.1501	25.5035	25.6174	25.3365	24.8267	26.4104	24.6271	24.3991	26.0455	26.1128	26.8378	27.5063	25.8304	26.1952	26.4669	25.0636	27.0937	26.6385	25.0864	25.2338	25.8365	24.4725	27.7257
Q9BT22	ALG1_HUMAN	Chitobiosyldiphosphodolichol beta-mannosyltransferase (EC 2.4.1.142) (Asparagine-linked glycosylation protein 1 homolog) (Beta-1,4-mannosyltransferase) (GDP-Man:GlcNAc2-PP-dolichol mannosyltransferase) (GDP-mannose-dolichol diphosphochitobiose mannosyltransferase) (Mannosyltransferase-1) (MT-1) (hMat-1)	ALG1 HMAT1 HMT1 PSEC0061 UNQ861/PRO1870	10	27.9441	28.7934	28.1752	28.2429	28.1129	28.4492	28.6416	28.9311	29.3403	28.315	27.8751	28.4288	28.0253	28.2499	28.7447	28.579	28.1418	28.2837	27.7961	28.3553	28.3907	28.547	28.7977	28.6945	28.3952	28.271	28.5511	28.9001	28.2933	28.104	28.1435	28.6162	29.2078	28.2714	28.7713	28.2697	28.8713	27.8354	27.9551	28.7285	28.1708	28.3638	28.512	28.3057	28.7847
Q2TAA5	ALG11_HUMAN	GDP-Man:Man(3)GlcNAc(2)-PP-Dol alpha-1,2-mannosyltransferase (EC 2.4.1.131) (Asparagine-linked glycosylation protein 11 homolog) (Glycolipid 2-alpha-mannosyltransferase)	ALG11 GT8	14	28.301	28.9803	28.594	28.362	28.24	29.0496	29.4295	29.2568	29.7237	28.6685	28.0943	28.5124	28.0205	28.211	28.6712	29.008	28.58	28.4363	27.8915	28.6914	28.5115	29.019	28.7798	28.3681	28.7322	28.6642	28.9358	28.4726	28.4374	28.6135	28.2103	28.5465	29.6367	28.1155	29.0863	28.9895	29.1158	28.4922	28.0113	28.9162	28.8137	28.7334	29.2789	27.8159	29.2005
Q9BV10	ALG12_HUMAN	Dol-P-Man:Man(7)GlcNAc(2)-PP-Dol alpha-1,6-mannosyltransferase (EC 2.4.1.260) (Asparagine-linked glycosylation protein 12 homolog) (hALG12) (Dolichyl-P-Man:Man(7)GlcNAc(2)-PP-dolichyl-alpha-1,6-mannosyltransferase) (Mannosyltransferase ALG12 homolog) (Membrane protein SB87)	ALG12 PP14673	6	26.6182	27.421	27.0541	26.7801	26.6604	27.2314	27.7225	27.5317	27.7105	27.2133	26.2224	26.6187	26.6993	26.6359	27.0659	27.1168	26.4822	26.8639	26.171	26.9845	26.6102	27.0764	27.1898	26.7445	26.9605	26.9198	27.2425	26.9524	26.8118	26.9714	26.704	26.9014	27.9036	27.1445	27.1359	27.1111	27.5629	27.0989	26.5376	27.2679	27.0369	27.0803	27.2624	26.9494	26.817
Q9NP73	ALG13_HUMAN	Putative bifunctional UDP-N-acetylglucosamine transferase and deubiquitinase ALG13 (EC 2.4.1.141) (EC 3.4.19.12) (Asparagine-linked glycosylation 13 homolog) (Glycosyltransferase 28 domain-containing protein 1) (UDP-N-acetylglucosamine transferase subunit ALG13 homolog)	ALG13 CXorf45 GLT28D1 MDS031	5	24.3416	25.6515	24.588	24.7256	24.1196	25.4937	25.3363	25.2244	25.8823	24.735	23.9625	25.0092	24.7129	24.3214	25.1562	24.7939	24.4691	25.0772	23.7921	25.0911	24.7365	25.1211	25.2621	25.0031	24.8876	24.4793	25.2309	25.8055	24.5419	24.889	24.5985	24.9141	25.9687	24.7467	25.1722	25.3034	25.7804	24.1521	24.4718	25.3621	24.8721	24.6191	25.2608	25.0962	25.4865
Q96F25	ALG14_HUMAN	UDP-N-acetylglucosamine transferase subunit ALG14 homolog	ALG14	1	23.4124	24.7771	25.0025	24.3875	24.2172	25.1732	25.1072	24.0415	25.1112	24.9277	23.742	24.557	24.7225	24.7573	24.4425	25.0037	24.3115	24.8707	24.1177	24.3	24.2678	24.3548	23.829	24.8641	24.7998	24.43	24.0179	24.7818	25.0847	24.5821	24.4328	24.3993	25.2732	24.9195	25.1322	23.7007	24.9589	24.9996	23.5224	24.8394	24.436	24.006	24.4445	24.7856	26.811
Q9H553	ALG2_HUMAN	Alpha-1,3/1,6-mannosyltransferase ALG2 (EC 2.4.1.132) (EC 2.4.1.257) (Asparagine-linked glycosylation protein 2 homolog) (GDP-Man:Man(1)GlcNAc(2)-PP-Dol alpha-1,3-mannosyltransferase) (GDP-Man:Man(1)GlcNAc(2)-PP-dolichol mannosyltransferase) (GDP-Man:Man(2)GlcNAc(2)-PP-Dol alpha-1,6-mannosyltransferase)	ALG2 UNQ666/PRO1298	13	28.8485	29.581	29.0809	28.9729	28.6364	29.4491	29.4184	29.9997	30.0467	29.2533	28.6656	29.0186	28.9419	28.7526	29.5163	29.5755	29.0234	29.014	29.043	29.1101	29.213	29.4665	29.5159	29.3421	29.0933	29.2309	29.3448	29.229	29.4382	29.073	29.1411	28.8001	30.0749	28.9779	29.65	29.2406	29.3269	28.991	28.7425	29.5321	28.8559	29.4795	29.6118	28.64	29.5414
Q92685	ALG3_HUMAN	Dol-P-Man:Man(5)GlcNAc(2)-PP-Dol alpha-1,3-mannosyltransferase (EC 2.4.1.258) (Asparagine-linked glycosylation protein 3 homolog) (Dol-P-Man-dependent alpha(1-3)-mannosyltransferase) (Dolichyl-P-Man:Man(5)GlcNAc(2)-PP-dolichyl mannosyltransferase) (Dolichyl-phosphate-mannose--glycolipid alpha-mannosyltransferase) (Not56-like protein)	ALG3 NOT NOT56L	2	24.5616	23.7128	24.1712	23.7586	24.0969	24.4103	24.7615	24.6391	25.5116	24.4137	24.1305	24.3119	24.0948	24.4371	24.0235	24.0165	23.699	24.0961	23.3274	24.7573	23.4653	24.9044	24.9089	24.7441	24.1746	24.224	24.8783	24.3422	24.6282	24.3974	23.8149	24.2401	24.4075	24.6992	24.0898	24.2819	24.4072	24.2177	23.3711	24.872	24.081	24.3706	24.7821	24.0949	22.8921
Q9Y673	ALG5_HUMAN	Dolichyl-phosphate beta-glucosyltransferase (DolP-glucosyltransferase) (EC 2.4.1.117) (Asparagine-linked glycosylation protein 5 homolog)	ALG5 HSPC149	12	26.2061	27.9444	27.1904	26.6762	26.4836	27.5419	27.4054	27.7595	27.7936	27.2773	26.977	27.3155	26.0283	26.4473	27.2622	27.0856	26.553	27.1361	26.4924	26.9863	26.7928	26.9112	27.2022	27.0329	26.9079	26.8892	26.6416	27.256	27.1762	27.0643	26.6838	27.2306	28.3446	27.2752	27.3751	27.5016	27.8434	26.6788	26.6657	27.4667	26.9887	27.0033	27.4642	27.0489	27.0656
Q9Y672	ALG6_HUMAN	Dolichyl pyrophosphate Man9GlcNAc2 alpha-1,3-glucosyltransferase (EC 2.4.1.267) (Asparagine-linked glycosylation protein 6 homolog) (Dol-P-Glc:Man(9)GlcNAc(2)-PP-Dol alpha-1,3-glucosyltransferase) (Dolichyl-P-Glc:Man9GlcNAc2-PP-dolichyl glucosyltransferase)	ALG6 My046	5	26.8639	27.6801	26.9895	27.1487	26.784	27.5063	28.0024	27.7129	27.3601	27.775	26.751	26.7146	27.1776	27.1304	26.8972	26.8709	26.8822	26.672	26.3782	27.1711	26.6998	27.9024	27.3871	26.7514	27.0445	26.7931	27.4858	27.1509	27.3963	27.0306	26.5949	27.2081	27.7796	27.1868	27.6163	27.4142	27.7887	27.2452	27.1905	28.0433	27.1019	27.2613	27.82	26.9287	27.7621
Q9BVK2	ALG8_HUMAN	Probable dolichyl pyrophosphate Glc1Man9GlcNAc2 alpha-1,3-glucosyltransferase (EC 2.4.1.265) (Asparagine-linked glycosylation protein 8 homolog) (Dol-P-Glc:Glc(1)Man(9)GlcNAc(2)-PP-dolichyl alpha-1,3-glucosyltransferase) (Dolichyl-P-Glc:Glc1Man9GlcNAc2-PP-dolichyl glucosyltransferase)	ALG8 HUSSY-02	2	23.682	23.8771	23.3106	23.7013	23.335	23.7538	23.9155	24.3179	24.201	24.2361	23.109	24.6326	24.6215	24.5431	24.9789	25.3073	24.7685	24.7725	23.8435	24.5545	25.1627	25.338	25.2241	24.8422	24.5843	24.7751	24.8506	24.5113	24.4451	24.392	24.2298	24.3486	24.1621	24.0121	24.1686	23.6785	23.2832	23.69	22.774	23.7593	23.5776	24.0521	24.3215	23.3971	23.2074
Q9H6U8	ALG9_HUMAN	Alpha-1,2-mannosyltransferase ALG9 (EC 2.4.1.259) (EC 2.4.1.261) (Asparagine-linked glycosylation protein 9 homolog) (Disrupted in bipolar disorder protein 1) (Dol-P-Man:Man(6)GlcNAc(2)-PP-Dol alpha-1,2-mannosyltransferase) (Dol-P-Man:Man(8)GlcNAc(2)-PP-Dol alpha-1,2-mannosyltransferase)	ALG9 DIBD1	10	26.6651	27.2168	26.6058	26.3928	26.1568	26.7979	27.347	27.071	27.4997	26.7417	25.9684	26.7311	26.315	26.1992	26.7484	26.6771	26.3512	26.9367	26.3337	26.4699	26.595	26.6141	26.7016	26.6197	26.4461	26.2111	26.3759	27.1115	26.3572	26.9881	26.8245	27.0251	27.6767	26.4601	26.8604	26.5317	27.1208	26.3254	26.1974	27.5224	26.5105	26.0905	26.8833	26.1166	28.6947
Q9BT30	ALKB7_HUMAN	Alpha-ketoglutarate-dependent dioxygenase alkB homolog 7, mitochondrial (EC 1.14.11.-) (Alkylated DNA repair protein alkB homolog 7) (Spermatogenesis cell proliferation-related protein) (Spermatogenesis-associated protein 11)	ALKBH7 ABH7 SPATA11 UNQ6002/PRO34564	2	21.9324	22.9826	24.2939	22.6205	22.8403	23.1491	23.3398	22.5191	22.0121	24.4467	23.1545	23.0609	21.9916	21.8948	21.998	23.0495	21.5748	23.3291	21.8587	20.6945	22.0567	20.5645	20.6812	23.2633	21.8085	21.976	20.3135	21.4336	22.2454	21.6793	22.5715	22.6333	24.9975	20.7965	22.9979	20.5964	22.8538	23.2568	23.1321	23.0072	22.3773	22.8783	21.9586	22.2961	20.1648
P55789	ALR_HUMAN	FAD-linked sulfhydryl oxidase ALR (EC 1.8.3.2) (Augmenter of liver regeneration) (hERV1) (Hepatopoietin)	GFER ALR HERV1 HPO	3	25.3376	24.8813	25.1467	23.7496	25.026	25.2674	24.9054	23.8384	23.0643	25.1717	25.0228	25.3681	24.5987	24.2812	24.6681	24.9478	23.2389	24.8973	23.5967	23.9624	23.5849	23.3328	23.7193	24.7239	24.4468	23.471	24.0005	25.2533	25.161	25.9271	25.0595	24.9551	25.2676	23.8423	25.3733	22.9608	25.0485	25.3372	23.4833	24.5926	24.0087	23.8071	24.3517	25.0487	26.1149
P35858	ALS_HUMAN	Insulin-like growth factor-binding protein complex acid labile subunit (ALS)	IGFALS ALS	5	23.0972	24.292	23.7746	23.5472	22.6961	23.5309	23.1349	24.4681	24.0863	23.2187	22.335	23.6734	23.2938	22.7154	23.4312	22.5034	23.7088	24.1898	23.6363	23.5756	23.4649	22.4678	22.6772	23.0223	22.8034	23.1251	23.1978	23.6438	22.2641	22.5435	23.3172	23.5304	23.9726	24.3467	23.4598	23.5992	23.7597	23.15	22.9004	23.4759	22.6745	23.6374	23.3186	23.1455	23.6197
Q96Q42	ALS2_HUMAN	Alsin (Amyotrophic lateral sclerosis 2 chromosomal region candidate gene 6 protein) (Amyotrophic lateral sclerosis 2 protein)	ALS2 ALS2CR6 KIAA1563	2	18.1442	18.8241	16.1137	19.0666	17.4735	19.6937	0.62663	18.3652	19.6933	16.8947	18.0455	17.9325	19.7517	17.3158	17.8902	1.05081	19.9553	15.5012	19.849	20.5407	17.0563	17.2257	19.3113	18.8002	16.3861	20.0759	18.0072	16.5206	17.267	19.3481	19.0186	0.679338	18.2875	21.6526	19.4875	19.9943	19.2911	17.366	18.5547	0.460173	17.9211	18.2448	15.9672	15.5391	16.0211
Q9UHK6	AMACR_HUMAN	Alpha-methylacyl-CoA racemase (EC 5.1.99.4) (2-methylacyl-CoA racemase)	AMACR	5	21.7722	25.5319	25.3012	23.6384	24.8044	25.0959	25.4782	22.977	24.1538	25.904	24.8253	24.622	23.7126	24.844	24.7853	23.9758	24.7475	24.9055	24.4533	24.2619	24.9478	23.4471	24.8462	25.0902	24.8974	24.7703	24.0875	24.4151	24.4399	22.3027	24.95	25.3061	26.2676	24.6563	24.6947	24.362	25.6036	24.4204	24.8879	23.8952	24.5571	22.3383	24.0458	24.7977	23.3882
P02760	AMBP_HUMAN	Protein AMBP [Cleaved into: Alpha-1-microglobulin (Protein HC) (Alpha-1 microglycoprotein) (Complex-forming glycoprotein heterogeneous in charge); Inter-alpha-trypsin inhibitor light chain (ITI-LC) (Bikunin) (EDC1) (HI-30) (Uronic-acid-rich protein); Trypstatin]	AMBP HCP ITIL	8	25.2783	24.6327	26.1964	28.5048	24.987	24.8152	24.1622	24.644	25.6095	24.961	25.0305	24.7735	28.0718	24.9943	25.9168	24.3575	27.5717	27.9903	25.1041	28.248	24.6745	23.7774	26.5313	26.2661	25.4636	23.6613	24.0701	27.2216	26.7083	25.3113	25.1354	26.4027	25.1373	25.556	24.9489	26.2032	25.1881	28.5339	24.364	24.7586	24.7426	25.819	23.5076	24.7863	30.1767
Q9UKV5	AMFR_HUMAN	E3 ubiquitin-protein ligase AMFR (EC 2.3.2.36) (Autocrine motility factor receptor) (AMF receptor) (RING finger protein 45) (gp78)	AMFR RNF45	17	28.5455	29.653	29.3448	29.3104	29.637	29.815	29.6144	29.3187	29.96	29.4235	29.4321	28.7095	28.4923	28.3963	28.6481	28.54	28.3065	28.6668	28.4898	28.7092	28.5132	28.6809	28.667	28.8359	28.585	28.8093	28.7139	29.1493	28.669	28.6024	28.5129	28.6988	30.0268	28.9918	29.2218	29.0155	29.5208	29.5921	28.5482	29.4529	29.201	28.9278	29.3436	28.9425	30.2158
Q9H4A4	AMPB_HUMAN	Aminopeptidase B (AP-B) (EC 3.4.11.6) (Arginine aminopeptidase) (Arginyl aminopeptidase)	RNPEP APB	6	25.1666	25.5168	24.9764	24.0944	24.0827	25.2519	25.012	24.6272	24.4946	24.8042	24.3924	25.3424	24.3921	24.6911	25.1014	24.0309	24.9274	24.6705	24.4797	24.8064	24.1385	24.5956	24.3289	24.2678	24.3192	23.7207	24.7894	25.1551	23.4138	22.9903	24.6861	25.0118	25.6302	25.6082	24.7069	25.4803	26.0621	24.5764	25.8977	25.9775	23.9385	24.9752	25.1614	22.7802	23.9744
Q01433	AMPD2_HUMAN	AMP deaminase 2 (EC 3.5.4.6) (AMP deaminase isoform L)	AMPD2	11	26.0788	26.2892	25.8949	25.6292	24.5477	25.8122	25.5104	24.9345	24.9348	26.2308	26.1919	25.7716	25.6779	26.0851	26.0612	25.4625	25.1763	25.5639	25.0043	24.7264	24.9593	24.7148	24.9768	25.2586	25.6514	25.4752	25.2944	26.415	24.3375	24.4339	25.907	25.9214	25.9198	25.1062	25.2581	25.6282	25.875	24.7402	26.7377	26.5282	25.3529	25.7399	25.7934	25.4806	27.1061
Q07075	AMPE_HUMAN	Glutamyl aminopeptidase (EAP) (EC 3.4.11.7) (Aminopeptidase A) (AP-A) (Differentiation antigen gp160) (CD antigen CD249)	ENPEP	2	23.2626	20.4073	16.6081	1.24016	16.3155	0.721834	17.537	0.70762	20.8344	16.0231	15.4706	18.741	17.9447	20.9534	15.3006	1.05081	17.7816	15.2801	0.632844	16.7282	17.8127	1.03444	16.0389	14.493	14.9402	0.698516	1.4917	18.1863	19.2785	1.93685	1.1207	16.4111	0.694299	15.5177	0.74354	22.5209	21.877	19.8911	23.6374	0.460173	17.427	15.1188	0.536108	15.8656	22.4496
P28838	AMPL_HUMAN	Cytosol aminopeptidase (EC 3.4.11.1) (Cysteinylglycine-S-conjugate dipeptidase) (EC 3.4.13.23) (Leucine aminopeptidase 3) (LAP-3) (Leucyl aminopeptidase) (Peptidase S) (Proline aminopeptidase) (EC 3.4.11.5) (Prolyl aminopeptidase)	LAP3 LAPEP PEPS	20	28.8914	30.0821	29.6609	28.272	28.5692	29.294	29.4434	28.8525	29.3643	29.4554	28.8767	29.4033	28.3595	28.6687	28.8794	29.2601	28.5916	29.2694	28.8118	28.5466	28.6941	28.2548	28.4916	29.0027	28.6807	28.4915	28.4459	29.1359	28.585	27.8001	29.1373	29.1563	30.0416	29.6576	29.1203	28.854	29.5124	28.9245	29.8168	29.6439	28.4678	28.4494	29.084	28.4956	29.5543
P15144	AMPN_HUMAN	Aminopeptidase N (AP-N) (hAPN) (EC 3.4.11.2) (Alanyl aminopeptidase) (Aminopeptidase M) (AP-M) (Microsomal aminopeptidase) (Myeloid plasma membrane glycoprotein CD13) (gp150) (CD antigen CD13)	ANPEP APN CD13 PEPN	20	28.3556	25.4461	24.5761	24.4994	25.7675	24.9251	24.6003	26.9107	25.1912	24.6708	24.8905	25.74	24.5712	26.7457	24.2383	24.3895	23.9078	24.3488	24.2569	24.616	24.5576	24.0658	24.7616	24.9977	24.5448	24.6161	24.4075	25.2104	25.588	24.7374	24.3869	24.3584	25.3739	25.3266	24.0741	26.1963	27.6269	26.1584	28.9679	25.2823	26.8352	24.7832	24.7337	24.6412	26.803
P30533	AMRP_HUMAN	Alpha-2-macroglobulin receptor-associated protein (Alpha-2-MRAP) (Low density lipoprotein receptor-related protein-associated protein 1) (RAP)	LRPAP1 A2MRAP	20	30.141	30.6602	30.4456	30.661	31.1181	30.971	31.0024	31.0204	31.8277	30.4688	30.6004	30.5669	30.4667	29.913	30.5624	30.7282	29.6653	30.8742	30.1414	30.3548	30.5265	30.5728	30.704	30.7177	30.3992	30.1972	30.3654	31.1619	30.6522	30.4899	30.8699	30.2703	31.0396	30.7835	31.0126	30.5774	30.5738	30.8941	30.0158	31.1323	30.7016	30.3796	30.8165	30.8272	32.7829
Q8IZ07	AN13A_HUMAN	Ankyrin repeat domain-containing protein 13A (Protein KE03)	ANKRD13A ANKRD13	2	20.6575	21.371	18.7533	19.5305	19.7284	19.4319	18.088	20.6614	20.5718	21.0454	19.7798	20.227	19.5497	18.3634	19.8583	20.5265	21.4914	19.9973	21.6097	20.6563	21.0404	21.025	20.7862	20.5341	20.6729	21.3732	21.6585	20.7789	19.8763	20.6904	19.9201	20.1084	21.4112	21.0263	18.7995	19.991	20.562	17.7496	21.001	18.8177	19.4211	21.3435	20.7679	19.6668	20.1842
P39687	AN32A_HUMAN	Acidic leucine-rich nuclear phosphoprotein 32 family member A (Acidic nuclear phosphoprotein pp32) (pp32) (Leucine-rich acidic nuclear protein) (LANP) (Mapmodulin) (Potent heat-stable protein phosphatase 2A inhibitor I1PP2A) (Putative HLA-DR-associated protein I) (PHAPI)	ANP32A C15orf1 LANP MAPM PHAP1	6	25.4833	25.7738	25.876	24.1374	24.9757	25.3588	24.836	24.5607	24.2635	25.6363	26.597	25.5053	24.0155	23.7926	25.5029	25.0653	26.0013	24.9449	24.9735	23.521	24.1517	23.9303	23.8895	24.6376	25.2004	24.6633	24.0421	25.2682	23.5931	23.0961	25.3013	25.0915	25.9904	23.8681	24.0722	24.7673	25.7275	24.4382	25.915	25.9939	23.921	23.9805	25.6449	24.3919	26.3086
Q92688	AN32B_HUMAN	Acidic leucine-rich nuclear phosphoprotein 32 family member B (Acidic protein rich in leucines) (Putative HLA-DR-associated protein I-2) (PHAPI2) (Silver-stainable protein SSP29)	ANP32B APRIL PHAPI2	4	26.3473	26.1274	26.513	24.9598	25.253	26.1837	26.2971	25.1674	25.176	26.5143	26.3459	25.8719	24.6982	25.0174	26.08	25.666	24.8315	25.6893	25.3796	23.5898	24.8463	24.5691	24.5754	25.3004	25.7622	25.333	24.6529	25.9454	24.2864	23.5117	25.9731	25.8522	26.7949	25.0053	24.8849	25.3501	26.4548	24.1441	26.4961	27.2123	24.8501	24.7016	26.2861	24.521	25.0262
O43423	AN32C_HUMAN	Acidic leucine-rich nuclear phosphoprotein 32 family member C (Phosphoprotein 32-related protein 1) (Tumorigenic protein pp32r1)	ANP32C PP32R1	2	25.5901	26.4234	26.4344	25.2592	25.9002	26.0012	26.1898	25.1379	26.4552	26.4426	26.4184	25.7839	25.4435	24.9712	25.3379	25.9398	25.7153	25.6169	25.7333	25.5844	25.4299	26.0506	25.1998	25.528	25.572	25.8598	25.3312	25.6731	25.4683	25.3354	25.6593	25.3542	26.3302	25.4817	25.9666	25.3456	25.6812	25.9004	25.8954	26.161	25.2131	25.3414	25.6186	25.2009	27.3755
O95626	AN32D_HUMAN	Acidic leucine-rich nuclear phosphoprotein 32 family member D (Phosphoprotein 32-related protein 2) (Tumorigenic protein pp32r2)	ANP32D PP32R2	2	23.5809	23.1056	23.5199	22.164	22.8097	22.8531	22.3815	21.4049	22.7237	22.8659	24.2859	23.1765	22.141	22.4303	23.3379	22.9385	22.25	22.6572	22.6403	21.1317	21.7915	22.0469	22.0433	22.4698	23.0283	22.483	22.3491	23.5425	21.5959	21.2999	23.3598	22.8904	22.7952	22.1202	21.1267	21.8265	22.8358	21.6886	23.3307	23.5118	21.6617	20.7319	22.9738	22.8079	24.4619
Q9BTT0	AN32E_HUMAN	Acidic leucine-rich nuclear phosphoprotein 32 family member E (LANP-like protein) (LANP-L)	ANP32E	4	25.38	25.6085	26.0151	24.6759	24.0411	24.9959	24.3541	23.9027	24.6247	25.5171	25.9404	25.7921	23.6335	24.0083	26.0758	25.0918	24.2335	25.1786	25.1831	23.3919	24.6738	24.3853	24.4739	25.1664	25.3578	24.7313	24.9485	25.8397	22.2586	25.494	25.6975	25.3566	25.8752	23.7166	22.3583	24.2162	25.6794	23.7753	26.2922	26.7668	23.4247	24.5158	25.3357	24.417	22.9825
A6NCL7	AN33B_HUMAN	Ankyrin repeat domain-containing protein 33B	ANKRD33B	6	21.9441	21.999	21.6115	23.2701	22.8792	22.2753	21.1166	22.9964	23.7313	21.742	22.0443	21.178	23.4356	22.9306	22.2259	21.9059	21.345	21.1118	23.1317	22.1285	21.6455	21.36	22.4421	22.2041	22.2457	22.4895	23.1445	22.3974	22.7071	23.2298	23.1617	22.0635	21.8826	25.1316	24.1348	22.911	22.7245	23.8101	22.5753	22.2967	22.6768	22.4106	22.5029	24.8769	26.8577
A6QL64	AN36A_HUMAN	Ankyrin repeat domain-containing protein 36A	ANKRD36 ANKRD36A KIAA1641 UNQ2430/PRO499	1	17.9346	20.2706	19.7294	17.3547	19.8574	19.5098	20.4144	20.0324	19.564	20.5193	18.3827	18.4826	18.225	18.2892	18.6499	19.9722	19.3596	18.8681	18.1874	18.5018	19.7237	17.9748	19.8341	20.0491	19.0075	19.231	18.377	18.4815	18.7745	19.3136	19.1241	19.5069	21.5277	19.3377	19.8826	19.1429	19.861	18.3736	18.3274	19.1461	19.2234	19.0242	19.6877	19.1761	16.5823
P54802	ANAG_HUMAN	Alpha-N-acetylglucosaminidase (EC 3.2.1.50) (N-acetyl-alpha-glucosaminidase) (NAG) [Cleaved into: Alpha-N-acetylglucosaminidase 82 kDa form; Alpha-N-acetylglucosaminidase 77 kDa form]	NAGLU UFHSD1	16	26.6177	27.8353	27.1691	27.1376	27.4238	27.6864	27.3643	27.6948	27.7537	27.3901	27.012	27.3022	26.95	27.2945	27.593	27.0382	26.9087	27.1227	27.1007	27.4717	27.7172	27.3402	28.0667	27.8142	27.5517	27.5681	27.4076	28.0567	27.6078	27.5457	27.5908	28.0805	28.4422	26.608	27.3759	27.1692	27.6084	26.8927	27.2384	27.4776	26.7264	27.0618	27.6157	28.096	28.9095
Q96K21	ANCHR_HUMAN	Abscission/NoCut checkpoint regulator (ANCHR) (MLL partner containing FYVE domain) (Zinc finger FYVE domain-containing protein 19)	ZFYVE19 ANCHR MPFYVE	2	21.7792	22.7857	22.8474	22.8465	22.9544	23.0376	22.5193	22.6674	23.0043	22.9451	22.6782	22.1761	22.4728	21.4566	22.7658	22.9908	23.741	22.0885	23.0261	22.399	24.1721	23.526	23.461	24.1906	22.5841	22.6352	23.3699	22.9862	23.6207	22.9366	22.7756	21.9272	23.2386	22.4267	22.8853	23.554	22.8945	22.7334	22.3106	23.1284	22.0398	22.6098	22.6487	21.9074	25.542
Q9P2R3	ANFY1_HUMAN	Rabankyrin-5 (Rank-5) (Ankyrin repeat and FYVE domain-containing protein 1) (Ankyrin repeats hooked to a zinc finger motif)	ANKFY1 ANKHZN KIAA1255	19	26.5092	26.4291	26.1822	26.6331	26.8574	26.6749	26.6195	27.1695	27.0765	26.1957	25.9403	26.2512	26.3376	26.3931	26.4104	25.8898	27.5288	26.1665	27.2676	27.2545	27.2507	27.7902	26.6254	25.9007	26.3611	27.7365	28.2546	26.788	25.948	27.7439	26.1168	26.1075	26.5195	27.5149	26.0064	27.3113	26.7806	26.2335	26.9062	26.6538	26.3708	27.5414	26.5099	25.6893	27.5182
Q9UNK9	ANGE1_HUMAN	Protein angel homolog 1	ANGEL1 KIAA0759	2	20.6211	21.6951	20.2716	21.5161	22.3416	22.4762	22.3712	23.091	22.833	22.5527	22.5131	22.4891	21.8309	21.9605	22.417	22.9183	22.944	20.8912	22.321	22.5599	22.935	22.7593	22.9952	21.5833	22.348	23.678	23.339	21.778	22.3507	22.8744	22.1541	21.4804	22.0254	22.1811	22.6135	21.9792	21.4427	21.5302	20.8087	21.4952	22.0243	22.5983	22.6051	22.7002	21.5723
P03950	ANGI_HUMAN	Angiogenin (EC 3.1.27.-) (Ribonuclease 5) (RNase 5)	ANG RNASE5	1	22.3731	21.3594	20.7569	21.7245	19.6789	21.4517	21.0956	21.3412	20.6028	21.9808	19.9509	21.105	22.0093	21.0439	21.0467	20.3469	22.7824	22.6998	22.189	22.3289	21.8033	21.6928	21.8576	21.4378	20.455	21.0844	21.864	20.6862	21.4503	20.2225	19.908	20.415	21.7294	23.5208	21.4288	23.2726	22.1625	21.3933	21.6045	21.4665	20.735	22.5241	20.9384	20.8465	18.4471
P01019	ANGT_HUMAN	Angiotensinogen (Serpin A8) [Cleaved into: Angiotensin-1 (Angiotensin 1-10) (Angiotensin I) (Ang I); Angiotensin-2 (Angiotensin 1-8) (Angiotensin II) (Ang II); Angiotensin-3 (Angiotensin 2-8) (Angiotensin III) (Ang III) (Des-Asp[1]-angiotensin II); Angiotensin-4 (Angiotensin 3-8) (Angiotensin IV) (Ang IV); Angiotensin 1-9; Angiotensin 1-7; Angiotensin 1-5; Angiotensin 1-4]	AGT SERPINA8	2	21.3036	20.8882	21.4013	21.2203	20.2308	21.5885	19.4788	20.6709	19.9169	20.9402	19.5091	20.6905	21.7973	22.1486	20.8459	21.431	19.8649	21.1797	21.7062	21.0207	20.4822	20.558	21.818	21.1616	19.6996	19.6547	20.6996	19.6825	21.9456	19.8162	20.6922	20.6677	21.3283	24.4684	22.0979	22.2305	24.7475	22.6154	23.9567	20.9459	20.5001	20.9917	21.4887	20.1345	23.3581
P16157	ANK1_HUMAN	Ankyrin-1 (ANK-1) (Ankyrin-R) (Erythrocyte ankyrin)	ANK1 ANK	56	28.735	31.6803	26.3944	26.9137	28.0009	27.6159	27.063	27.1671	27.8208	27.7581	26.7996	26.8483	26.9978	27.9082	26.6921	26.8364	27.2543	27.2435	27.8638	27.7797	27.8768	27.6069	27.8045	28.0149	26.894	26.9463	27.638	27.2752	30.6371	27.3542	27.5908	27.3352	26.78	26.4331	26.9102	29.2728	27.3005	27.2317	27.2583	27.5309	27.2392	27.0334	26.9656	29.5506	30.1298
Q01484	ANK2_HUMAN	Ankyrin-2 (ANK-2) (Ankyrin-B) (Brain ankyrin) (Non-erythroid ankyrin)	ANK2 ANKB	13	24.3482	26.1996	23.3931	23.8075	23.7903	24.2823	23.8814	23.9153	25.6003	24.1209	23.7011	23.6534	23.9402	24.1441	23.2148	22.9468	23.8853	23.6469	25.1933	24.6491	24.0094	24.2965	24.5157	23.2481	23.8909	24.3072	24.7293	23.965	25.3698	24.2926	23.2757	23.52	23.3796	24.1358	24.2043	24.6267	24.0097	23.9398	24.0023	26.4428	24.1603	23.8107	23.4996	25.1356	24.7682
Q12955	ANK3_HUMAN	Ankyrin-3 (ANK-3) (Ankyrin-G)	ANK3	32	26.2261	27.5407	26.6334	26.8343	26.8799	27.1105	27.1766	27.0678	27.8433	26.9696	26.879	26.5131	26.3647	26.1204	25.8083	25.8825	27.4206	26.6416	27.7672	27.3486	27.2294	27.2878	27.3954	26.1738	27.0484	27.275	27.5887	26.5677	26.76	27.4424	26.2076	26.0595	26.9775	27.0177	27.223	26.7863	27.1647	26.8156	25.918	26.4044	27.0021	27.1523	26.9353	26.9699	27.5812
Q9HCJ1	ANKH_HUMAN	Progressive ankylosis protein homolog (ANK)	ANKH KIAA1581 UNQ241/PRO274	9	25.8893	25.7364	25.3407	25.731	24.8764	26.1695	25.9241	25.3277	26.1217	26.4935	25.1596	25.5714	25.8875	26.1059	25.5891	25.2676	25.2585	25.724	24.3118	25.2552	25.2346	25.5395	25.2563	25.8673	25.308	25.1603	25.3309	25.9217	25.4712	24.9646	25.8931	26.0227	25.5373	24.8965	25.6846	25.9336	25.8078	25.9135	25.7912	26.0521	25.8941	25.8045	26.1298	24.8727	27.5687
Q8IWZ3	ANKH1_HUMAN	Ankyrin repeat and KH domain-containing protein 1 (HIV-1 Vpr-binding ankyrin repeat protein) (Multiple ankyrin repeats single KH domain) (hMASK)	ANKHD1 KIAA1085 MASK VBARP PP2500	9	24.3643	25.2227	25.1721	25.3683	25.9936	25.4233	25.8283	26.3343	25.995	25.267	25.5778	24.7353	24.6554	25.05	25.2642	25.1729	25.9385	24.8307	26.0398	25.3498	25.9068	25.7306	25.7129	24.8766	25.3747	26.1445	26.0597	25.3495	25.1805	25.9327	24.6856	24.9187	25.9853	25.1621	25.5636	25.3556	25.6776	25.1387	25.0305	25.202	25.2976	25.9606	25.3294	24.8713	25.473
Q86XL3	ANKL2_HUMAN	Ankyrin repeat and LEM domain-containing protein 2 (LEM domain-containing protein 4)	ANKLE2 KIAA0692 LEM4	9	24.3959	24.2571	24.5852	25.136	25.3806	24.6315	24.9676	25.4512	25.7661	24.8956	25.0219	24.9452	24.8359	25.0201	25.1791	25.0053	25.0611	24.2505	24.9849	24.7859	25.1969	25.2432	24.8918	24.4471	24.7513	25.459	25.499	25.2282	24.5519	25.4212	24.9016	24.5791	26.0188	24.6361	24.5598	24.592	25.0242	24.9799	23.9722	24.6238	24.5486	25.2267	24.534	24.4987	25.163
Q9BQD7	ANKMT_HUMAN	Adenine nucleotide translocase lysine N-methyltransferase (ANT-KMT) (EC 2.1.1.-)	ANTKMT C16orf24 FAM173A RJD7	2	19.8029	21.9623	22.9422	21.4346	21.0318	22.1867	21.5419	19.7487	18.1835	22.5444	20.9447	22.145	21.3089	21.1682	20.2608	19.8955	20.2413	21.4877	19.8994	18.5382	21.3886	15.8925	19.6064	20.9319	19.9081	20.0928	16.5295	21.1367	21.7447	20.8817	20.8565	19.4186	22.9048	18.7633	21.4805	16.6552	21.2301	21.9238	20.8825	21.7515	19.9408	21.2483	19.88	21.7358	21.3839
Q8IV38	ANKY2_HUMAN	Ankyrin repeat and MYND domain-containing protein 2	ANKMY2	12	26.4417	26.863	27.227	26.8818	27.1569	27.0372	26.6393	26.9459	26.9569	26.9297	26.6506	26.6895	27.0381	26.7136	26.8916	26.8161	27.4862	26.8463	27.6608	27.0438	27.5308	27.4438	26.9379	26.9562	26.8924	27.6704	27.7675	27.2257	26.7445	27.1348	26.964	26.7501	27.2081	27.3594	27.0243	27.1501	26.3546	26.7805	26.7994	26.937	26.3782	27.4815	26.8853	27.683	28.9514
Q9H8Y5	ANKZ1_HUMAN	Ankyrin repeat and zinc finger domain-containing protein 1 (Zinc finger protein 744)	ANKZF1 ZNF744	2	21.4916	22.0588	21.1782	21.0487	20.7077	21.2486	21.6418	20.6319	19.4069	21.9203	20.7857	22.2092	20.5579	21.2014	21.8553	22.276	20.126	21.8544	20.7907	20.2158	20.4911	19.8639	20.1325	21.53	20.929	21.2693	20.0808	21.987	21.0869	20.3402	22.0903	21.9197	21.1503	17.9364	21.1955	19.5037	20.5098	21.3558	21.003	20.742	21.4368	20.6402	20.052	20.6113	21.9481
Q99873	ANM1_HUMAN	Protein arginine N-methyltransferase 1 (EC 2.1.1.319) (Histone-arginine N-methyltransferase PRMT1) (Interferon receptor 1-bound protein 4)	PRMT1 HMT2 HRMT1L2 IR1B4	5	25.625	24.9252	24.513	24.2486	22.9138	24.7737	24.432	24.681	23.7018	24.428	24.0242	24.7452	24.2717	24.2668	24.8164	25.7131	24.0891	24.3977	24.3546	23.2879	24.3755	24.8894	23.5562	24.084	24.1195	24.3108	24.4625	24.8541	23.0951	27.703	24.5861	24.5267	24.9567	24.297	23.8238	24.3764	24.5375	23.6686	24.8194	26.6851	23.76	26.5671	24.6401	23.478	28.9698
O14744	ANM5_HUMAN	Protein arginine N-methyltransferase 5 (PRMT5) (EC 2.1.1.320) (72 kDa ICln-binding protein) (Histone-arginine N-methyltransferase PRMT5) (Jak-binding protein 1) (Shk1 kinase-binding protein 1 homolog) (SKB1 homolog) (SKB1Hs) [Cleaved into: Protein arginine N-methyltransferase 5, N-terminally processed]	PRMT5 HRMT1L5 IBP72 JBP1 SKB1	3	22.6861	21.8419	22.0387	22.1125	21.4884	22.154	21.8458	21.4216	21.2809	20.8416	23.1074	22.0374	21.8709	22.5323	22.8679	22.1815	21.888	21.3687	21.0973	21.0814	21.842	21.6305	21.1007	21.4758	21.9021	21.8921	22.6117	22.7801	21.173	20.3477	22.1578	21.921	22.1295	22.3525	21.4488	22.4637	21.7179	21.5271	22.9281	23.0781	22.158	22.0289	22.6676	20.8556	24.9167
Q6P2P2	ANM9_HUMAN	Protein arginine N-methyltransferase 9 (Protein arginine N-methyltransferase 10) (EC 2.1.1.320)	PRMT9 PRMT10	2	19.8233	20.9025	20.7623	20.6076	20.4847	21.3	21.2191	21.5549	21.7791	21.5598	20.2197	21.4927	18.927	19.7711	20.57	17.554	22.1624	20.5434	21.3565	21.6661	21.3864	21.4269	21.8947	19.9015	20.3954	21.5953	22.0049	21.4094	19.2578	21.7197	20.445	22.6346	21.696	20.1193	19.8042	20.8475	23.1279	19.1095	21.0678	19.0777	19.6969	22.1069	19.4395	19.8203	21.4236
Q9NW15	ANO10_HUMAN	Anoctamin-10 (Transmembrane protein 16K)	ANO10 TMEM16K	30	30.5834	31.8296	30.9506	30.7089	31.1174	31.3342	31.6338	31.5768	32.3751	30.8492	30.8094	31.164	30.9185	31.0426	31.3636	31.2571	31.0164	31.0262	30.6322	31.0195	31.0051	31.6689	31.7071	31.4508	31.6466	31.2936	31.3056	31.4879	31.6779	31.3201	31.331	30.8915	31.6418	30.8564	31.1148	31.3022	31.1572	31.1857	30.7232	31.491	31.1701	30.9421	31.3259	31.4482	32.5562
Q4KMQ2	ANO6_HUMAN	Anoctamin-6 (Small-conductance calcium-activated nonselective cation channel) (SCAN channel) (Transmembrane protein 16F)	ANO6 TMEM16F	18	28.1228	27.9962	27.2705	27.3469	26.7183	27.8465	27.9422	27.5201	27.6054	27.7859	27.119	27.85	27.727	28.2706	27.978	27.4894	27.2274	28.4809	26.6646	27.441	27.5143	27.256	27.0853	27.7958	27.1743	27.0427	27.1505	28.5068	27.4302	26.9623	28.3871	28.6646	27.9379	27.8874	27.4823	28.2323	27.8258	27.7871	28.0812	28.0854	27.879	27.7416	27.6878	26.574	29.7319
Q9HCE9	ANO8_HUMAN	Anoctamin-8 (Transmembrane protein 16H)	ANO8 KIAA1623 TMEM16H	7	24.9199	25.1983	25.4085	25.2378	24.5145	26.0188	25.8308	25.3916	25.5479	25.6448	25.1724	25.4245	25.4407	25.3367	25.5116	25.6036	25.0657	25.5842	24.9018	25.0247	25.0079	24.8816	25.3194	25.3429	25.1209	25.4848	25.4833	25.6098	25.1116	24.8553	25.161	25.4535	26.1306	24.7889	25.3469	24.6206	25.5452	25.5606	24.8447	25.4374	25.0701	24.5951	25.3161	25.8292	24.3792
P20594	ANPRB_HUMAN	Atrial natriuretic peptide receptor 2 (EC 4.6.1.2) (Atrial natriuretic peptide receptor type B) (ANP-B) (ANPR-B) (NPR-B) (Guanylate cyclase B) (GC-B)	NPR2 ANPRB	3	20.9637	21.8697	20.7614	21.3646	19.8875	21.6919	21.2375	20.075	21.0328	21.7691	19.9918	22.2318	22.1444	22.3981	22.8108	20.8653	21.9171	21.7853	20.2882	21.3064	21.2531	20.5996	21.1819	21.8534	21.1961	21.5739	21.3397	22.3228	22.1738	19.0001	22.4487	22.6614	21.0091	21.9538	21.5072	22.2986	20.772	21.7537	22.1115	22.0191	21.6544	21.8678	21.0253	20.7408	20.4015
O75179	ANR17_HUMAN	Ankyrin repeat domain-containing protein 17 (Gene trap ankyrin repeat protein) (Serologically defined breast cancer antigen NY-BR-16)	ANKRD17 GTAR KIAA0697	8	24.8605	25.5247	25.7452	25.9643	26.1981	25.7403	26.2036	26.6991	26.681	25.7597	25.8236	25.631	25.658	25.6907	26.041	25.9326	26.301	25.7008	26.5837	26.0457	26.3968	26.4493	26.2268	25.6953	26.052	26.5943	26.6215	25.9673	25.8401	26.2481	25.6121	25.6126	26.3064	25.6146	26.0205	25.833	25.9892	25.5061	25.4119	25.6464	25.9253	26.3984	25.815	25.8738	25.6702
Q96NW4	ANR27_HUMAN	Ankyrin repeat domain-containing protein 27 (VPS9 domain-containing protein)	ANKRD27 PP12899	4	22.8263	23.8193	23.6567	23.5727	23.7787	23.8022	24.3279	24.0777	25.4021	23.536	23.2454	23.2808	23.3929	22.8874	23.6107	23.8632	23.6533	23.6334	23.8292	23.9567	23.6827	24.3353	23.8952	23.7255	23.8389	23.9175	23.8563	22.8595	23.4971	24.0971	23.5896	23.2406	23.4965	22.9519	24.0558	23.7941	23.8996	23.7065	22.7578	23.7845	23.641	23.7745	23.326	23.6658	24.5481
O15084	ANR28_HUMAN	Serine/threonine-protein phosphatase 6 regulatory ankyrin repeat subunit A (PP6-ARS-A) (Serine/threonine-protein phosphatase 6 regulatory subunit ARS-A) (Ankyrin repeat domain-containing protein 28) (Phosphatase interactor targeting protein hnRNP K) (PITK)	ANKRD28 KIAA0379	3	20.9584	20.8602	20.6191	21.9514	21.6526	20.9504	20.2154	21.606	22.155	21.2127	20.1281	21.5826	21.5116	21.3777	20.2661	20.2648	22.4072	20.7423	22.254	21.9995	21.6115	22.1421	22.0222	21.1581	21.5802	22.2795	22.9019	21.6134	20.1464	21.1998	20.653	20.1043	20.777	21.4133	20.8385	21.8336	22.2243	20.3668	21.4797	21.6809	20.7117	22.3877	21.1669	20.2641	23.4733
Q86W74	ANR46_HUMAN	Ankyrin repeat domain-containing protein 46 (Ankyrin repeat small protein) (ANK-S)	ANKRD46	4	24.1975	24.4386	23.5562	23.7283	22.739	24.728	24.868	24.8261	25.5179	23.8488	23.7429	23.5554	24.1244	23.6948	23.6332	24.2923	23.7311	23.8963	23.6506	24.0968	24.0616	24.2319	23.8316	23.721	23.9113	24.0871	24.421	24.4835	23.8712	24.1644	23.5725	23.6029	24.2224	22.9987	24.8752	23.9141	23.6659	23.9503	23.4145	24.4055	23.9383	23.4892	24.409	23.6993	24.6111
Q92625	ANS1A_HUMAN	Ankyrin repeat and SAM domain-containing protein 1A (Odin)	ANKS1A ANKS1 KIAA0229 ODIN	3	24.2345	26.4895	24.9942	24.5901	24.5631	25.0079	26.0202	25.0673	25.0058	25.6515	24.9437	25.163	24.4004	25.0007	25.2693	24.6094	24.7409	25.0001	24.8742	24.5866	25.0435	24.5354	24.9726	24.4571	24.5583	25.1067	24.7359	25.1653	24.1507	24.4843	25.436	25.9435	26.1662	24.7317	25.5002	25.4477	26.45	23.8541	26.2402	26.8355	24.5334	24.5091	25.5628	23.7937	25.2684
P01008	ANT3_HUMAN	Antithrombin-III (ATIII) (Serpin C1)	SERPINC1 AT3 PRO0309	3	22.0835	20.5133	21.1108	21.0511	18.2993	21.1447	19.7951	21.3562	20.8178	20.9937	18.3204	20.523	21.7258	21.9908	20.2713	22.4715	21.2908	21.7776	20.5988	22.2879	21.2772	21.3647	22.065	21.1999	19.6935	19.4728	21.0671	19.8049	22.1269	19.1427	19.7909	20.4698	18.9645	24.7472	21.5026	23.6565	21.0171	22.2254	21.9487	21.4831	21.2105	20.6707	19.9963	19.8098	21.1214
P50995	ANX11_HUMAN	Annexin A11 (56 kDa autoantigen) (Annexin XI) (Annexin-11) (Calcyclin-associated annexin 50) (CAP-50)	ANXA11 ANX11	13	27.922	28.0576	27.8345	27.9164	27.1473	28.0722	27.8137	28.3728	28.1945	27.4089	27.7044	28.156	28.0603	27.8379	27.9332	27.6693	27.7987	29.1402	27.4099	28.8385	27.3208	28.4205	28.5016	28.1149	27.9831	27.5422	28.0976	27.8658	28.0162	27.0068	27.5441	27.4933	28.3175	29.7389	28.3543	28.5572	28.6016	28.2237	28.7718	27.8427	27.4981	28.3551	27.6415	27.8811	29.0139
P04083	ANXA1_HUMAN	Annexin A1 (Annexin I) (Annexin-1) (Calpactin II) (Calpactin-2) (Chromobindin-9) (Lipocortin I) (Phospholipase A2 inhibitory protein) (p35)	ANXA1 ANX1 LPC1	18	29.5715	26.979	26.3019	26.5499	26.8788	25.6469	26.1147	26.7706	26.9522	26.4565	25.4358	27.1551	27.4465	28.371	26.1985	25.5521	26.2029	28.366	27.9271	29.1308	26.4395	26.8365	27.9437	26.1839	25.3336	25.7812	27.8012	25.448	29.2443	26.7592	25.8107	26.1303	26.3529	30.9611	27.5949	28.5547	28.6872	28.2175	30.5547	25.2956	27.3422	26.9871	25.4766	26.641	29.7642
P07355	ANXA2_HUMAN	Annexin A2 (Annexin II) (Annexin-2) (Calpactin I heavy chain) (Calpactin-1 heavy chain) (Chromobindin-8) (Lipocortin II) (Placental anticoagulant protein IV) (PAP-IV) (Protein I) (p36)	ANXA2 ANX2 ANX2L4 CAL1H LPC2D	21	33.0836	30.0587	28.1616	28.659	30.0545	27.7335	27.7087	28.3852	28.4129	28.4247	26.8139	30.6284	29.0529	31.1039	28.0583	27.878	27.2241	30.686	29.5759	30.4204	28.358	28.842	28.8353	28.7278	27.625	27.3806	28.5383	28.411	31.4525	28.0258	28.5371	27.9996	27.8859	34.2428	28.8028	31.0112	31.7368	30.8141	34.0155	27.7951	30.7999	28.5676	27.708	28.4986	31.1895
P12429	ANXA3_HUMAN	Annexin A3 (35-alpha calcimedin) (Annexin III) (Annexin-3) (Inositol 1,2-cyclic phosphate 2-phosphohydrolase) (Lipocortin III) (Placental anticoagulant protein III) (PAP-III)	ANXA3 ANX3	3	23.3742	23.3816	22.4725	21.5961	22.4925	21.9018	22.7148	22.4028	23.2917	22.0024	22.3189	22.6509	22.4389	22.3895	22.2672	22.1318	22.4497	22.325	22.906	23.157	22.2881	22.5136	22.5457	22.709	21.904	22.5009	21.3738	22.1989	22.1046	21.9003	22.2765	22.2207	23.0879	24.6303	21.9446	22.3342	22.743	22.0874	24.5178	22.2836	22.6418	21.9848	21.5642	23.6699	23.5164
P09525	ANXA4_HUMAN	Annexin A4 (35-beta calcimedin) (Annexin IV) (Annexin-4) (Carbohydrate-binding protein p33/p41) (Chromobindin-4) (Endonexin I) (Lipocortin IV) (P32.5) (PP4-X) (Placental anticoagulant protein II) (PAP-II) (Protein II)	ANXA4 ANX4	17	29.9993	29.6682	29.5337	30.5547	28.3087	30.0935	29.707	29.4427	29.9486	28.9024	29.4942	29.9826	29.9872	29.7331	30.0431	29.4605	29.3083	31.2673	29.3814	31.0448	29.3451	29.6816	29.1045	30.0435	29.7792	28.9868	29.5718	29.8366	29.3029	28.9959	29.794	29.7099	30.0823	31.4324	30.364	29.7106	30.2643	30.3592	30.5132	30.0131	29.1597	29.6958	29.5335	29.6298	31.0171
P08758	ANXA5_HUMAN	Annexin A5 (Anchorin CII) (Annexin V) (Annexin-5) (Calphobindin I) (CBP-I) (Endonexin II) (Lipocortin V) (Placental anticoagulant protein 4) (PP4) (Placental anticoagulant protein I) (PAP-I) (Thromboplastin inhibitor) (Vascular anticoagulant-alpha) (VAC-alpha)	ANXA5 ANX5 ENX2 PP4	18	31.4495	31.0348	30.5461	30.2434	29.8197	30.5246	30.3862	29.9722	30.3375	30.0884	30.6367	30.6593	30.4904	31.2114	31.1527	31.0886	30.5342	31.2082	30.5628	30.9405	29.9322	29.9109	30.8062	30.7575	30.3826	29.6126	31.1697	29.9949	30.3755	30.0719	30.5055	30.3382	30.6848	33.68	31.5459	31.0393	31.0719	30.4193	32.3267	30.919	30.3562	31.1112	30.4533	30.693	31.5529
P08133	ANXA6_HUMAN	Annexin A6 (67 kDa calelectrin) (Annexin VI) (Annexin-6) (Calphobindin-II) (CPB-II) (Chromobindin-20) (Lipocortin VI) (Protein III) (p68) (p70)	ANXA6 ANX6	46	32.2476	32.6438	31.8954	33.4853	31.154	32.8255	32.0897	32.7723	32.7738	32.1331	32.1727	32.9818	32.6676	32.6985	32.8157	32.3357	31.5759	33.3212	31.8366	32.4457	31.8741	32.1279	31.9579	32.2105	32.2894	31.8557	32.6999	32.3651	32.5667	31.9369	33.0298	32.5456	33.0048	33.7833	33.2913	32.887	32.8927	32.537	33.3717	32.7586	32.2769	32.4469	32.3368	32.643	33.7252
P20073	ANXA7_HUMAN	Annexin A7 (Annexin VII) (Annexin-7) (Synexin)	ANXA7 ANX7 SNX OK/SW-cl.95	13	28.7769	28.9531	28.4658	28.7038	27.6307	28.6578	28.3287	28.7652	29.1996	27.7937	28.6554	28.5493	28.8122	28.6555	28.6309	28.903	28.963	30.1746	28.5611	28.8645	28.1708	28.9869	28.8515	28.477	28.5555	28.1542	29.0994	28.573	28.5407	28.0977	28.1722	27.8998	28.9839	30.1872	30.0112	29.4647	28.9424	28.7062	29.3139	29.0251	27.8946	29.3582	28.3795	29.2355	29.1655
O75106	AOC2_HUMAN	Retina-specific copper amine oxidase (RAO) (EC 1.4.3.21) (Amine oxidase [copper-containing]) (Semicarbazide-sensitive amine oxidase) (SSAO)	AOC2	6	23.6535	22.7215	22.8927	24.195	24.1235	23.7939	23.298	24.1062	23.4939	20.7036	22.5364	18.5941	21.3377	25.5036	21.5533	18.1566	22.3788	20.5896	20.2866	22.556	21.5281	22.1872	21.8278	21.8589	22.6694	21.4512	21.3814	20.5935	21.2582	23.3487	18.4064	20.5883	22.3572	26.1842	22.3938	22.7	24.4757	24.5468	21.8327	24.003	23.8055	22.67	22.8711	19.8935	22.7983
Q16853	AOC3_HUMAN	Membrane primary amine oxidase (EC 1.4.3.21) (Copper amine oxidase) (HPAO) (Semicarbazide-sensitive amine oxidase) (SSAO) (Vascular adhesion protein 1) (VAP-1)	AOC3 VAP1	4	23.6582	22.6749	22.8489	24.2777	24.066	23.5226	23.3194	24.2079	23.4189	21.0917	22.5505	19.279	20.5061	25.2976	20.4867	19.8745	20.516	20.4587	20.0803	22.4125	20.4665	20.4116	21.9959	21.927	21.8797	21.1825	21.3269	20.4292	21.1905	22.4007	16.1542	20.277	22.4386	26.1894	22.4729	23.6464	24.3787	24.2913	22.7925	23.406	23.5312	22.3913	22.8558	20.0071	22.7187
P21397	AOFA_HUMAN	Amine oxidase [flavin-containing] A (EC 1.4.3.4) (Monoamine oxidase type A) (MAO-A)	MAOA	23	31.1527	32.2158	31.7412	30.9237	31.033	32.1561	32.313	30.9495	32.1782	32.1108	31.2114	31.4781	31.5633	31.503	31.4103	31.9074	30.8705	31.5122	31.2661	31.2972	31.4639	31.3413	30.5898	31.8965	31.3863	31.4554	30.6998	30.9313	31.8056	31.1126	31.6426	31.1577	32.3876	31.2903	32.5343	31.1491	32.2712	31.9389	31.3453	31.7969	31.5448	31.3612	31.7341	32.1298	32.3631
P27338	AOFB_HUMAN	Amine oxidase [flavin-containing] B (EC 1.4.3.4) (Monoamine oxidase type B) (MAO-B)	MAOB	21	29.6186	30.5048	30.9214	30.3642	29.9231	31.026	31.2036	30.3915	31.0654	30.8388	30.0827	30.8555	30.7397	30.3277	30.4967	31.0145	30.5684	30.6591	30.4615	30.9252	30.5095	31.2748	30.5402	30.9642	30.2126	30.5115	30.0673	30.3782	31.1819	30.2388	30.2694	30.1093	31.3696	30.7553	31.1032	29.7545	30.2801	30.4609	30.3518	30.7544	30.388	30.3377	30.6793	30.3392	31.0737
O60641	AP180_HUMAN	Clathrin coat assembly protein AP180 (91 kDa synaptosomal-associated protein) (Clathrin coat-associated protein AP180) (Phosphoprotein F1-20)	SNAP91 KIAA0656	2	24.1491	25.2724	24.6405	23.1269	22.6619	24.4361	23.8251	23.9465	23.5521	25.3346	23.4221	24.469	22.8709	23.9973	24.4803	24.4258	23.0433	23.4408	23.1884	22.3136	21.9541	23.675	23.6613	24.5768	24.0158	23.8435	23.2676	24.7662	23.971	24.163	24.3655	24.923	24.9674	23.1104	24.4636	23.983	24.3001	23.9305	25.123	23.4284	23.6355	23.9356	24.9613	23.793	23.8515
Q10567	AP1B1_HUMAN	AP-1 complex subunit beta-1 (Adaptor protein complex AP-1 subunit beta-1) (Adaptor-related protein complex 1 subunit beta-1) (Beta-1-adaptin) (Beta-adaptin 1) (Clathrin assembly protein complex 1 beta large chain) (Golgi adaptor HA1/AP1 adaptin beta subunit)	AP1B1 ADTB1 BAM22 CLAPB2	31	29.928	29.9865	29.7424	29.3886	29.0053	29.9101	29.8333	28.967	29.7881	30.0629	29.2275	29.5505	29.9081	29.5383	29.7982	30.0061	28.6519	29.418	28.6293	28.7634	28.9375	29.0811	29.0238	29.3864	29.4404	29.4051	29.349	30.419	29.6233	29.9187	29.98	29.688	29.9094	28.9923	29.3702	28.6423	29.4728	29.741	29.6259	29.9285	29.7144	29.0743	29.7333	29.564	30.8282
O43747	AP1G1_HUMAN	AP-1 complex subunit gamma-1 (Adaptor protein complex AP-1 subunit gamma-1) (Adaptor-related protein complex 1 subunit gamma-1) (Clathrin assembly protein complex 1 gamma-1 large chain) (Gamma1-adaptin) (Golgi adaptor HA1/AP1 adaptin subunit gamma-1)	AP1G1 ADTG CLAPG1	15	28.4232	28.5977	28.5667	28.1452	27.8266	28.7546	28.7588	28.0703	28.4663	28.7417	27.9254	28.3849	28.5457	28.0703	28.5347	28.6564	27.9391	27.9891	27.6348	27.2465	27.7119	27.9317	27.6284	27.9035	27.9886	28.2045	28.3224	29.1778	28.2464	28.5181	28.6541	28.5788	29.0127	27.856	27.9887	27.8924	28.487	27.9481	28.5519	28.9066	28.7635	28.4595	28.8116	27.7173	29.1635
O75843	AP1G2_HUMAN	AP-1 complex subunit gamma-like 2 (Gamma2-adaptin) (G2ad)	AP1G2	2	18.5609	18.9169	18.5476	20.3536	19.3305	18.4814	18.3595	20.6097	21.0927	19.2367	18.9648	17.7031	19.6727	19.6038	18.398	20.1039	20.8374	18.5474	20.1452	20.7396	20.3278	20.2983	20.9287	18.9171	19.4264	20.2	20.8213	19.5843	18.4093	20.9497	18.7999	19.0788	18.401	21.8188	18.2961	19.9604	17.246	19.5944	18.3958	18.4114	20.697	20.3218	19.3695	19.7771	25.7589
Q9BXS5	AP1M1_HUMAN	AP-1 complex subunit mu-1 (AP-mu chain family member mu1A) (Adaptor protein complex AP-1 subunit mu-1) (Adaptor-related protein complex 1 subunit mu-1) (Clathrin assembly protein complex 1 mu-1 medium chain 1) (Clathrin coat assembly protein AP47) (Clathrin coat-associated protein AP47) (Golgi adaptor HA1/AP1 adaptin mu-1 subunit) (Mu-adaptin 1) (Mu1A-adaptin)	AP1M1 CLTNM	11	27.8373	28.0687	28.0806	27.4649	26.9737	28.1674	28.2661	27.2509	27.5222	28.2778	27.2679	27.8834	27.6539	27.4151	27.9363	28.0252	27.1667	27.4462	26.9851	26.8533	27.2565	27.2418	27.0934	27.4887	27.4073	27.4656	27.3207	28.6677	27.4186	27.681	28.135	28.0982	28.343	27.4132	27.589	27.1539	27.9395	27.3719	28.0803	28.1091	28.1522	27.6043	27.938	26.9999	28.2456
P61966	AP1S1_HUMAN	AP-1 complex subunit sigma-1A (Adaptor protein complex AP-1 subunit sigma-1A) (Adaptor-related protein complex 1 subunit sigma-1A) (Clathrin assembly protein complex 1 sigma-1A small chain) (Clathrin coat assembly protein AP19) (Golgi adaptor HA1/AP1 adaptin sigma-1A subunit) (HA1 19 kDa subunit) (Sigma 1a subunit of AP-1 clathrin) (Sigma-adaptin 1A) (Sigma1A-adaptin)	AP1S1 AP19 CLAPS1	1	23.739	23.6809	23.555	23.3495	23.1895	24.0434	24.3748	22.9328	23.5899	24.161	23.1626	23.2092	23.6262	22.7503	23.1418	23.3693	22.7995	22.384	22.6115	22.7521	22.1717	22.824	22.7143	22.4849	22.8721	22.5332	23.5286	23.5664	22.9324	23.7998	23.0173	23.0438	24.0318	23.253	23.0633	23.8273	24.0338	23.7012	23.1892	23.4834	23.9882	23.45	23.9284	21.3533	20.8514
P56377	AP1S2_HUMAN	AP-1 complex subunit sigma-2 (Adaptor protein complex AP-1 subunit sigma-1B) (Adaptor-related protein complex 1 subunit sigma-1B) (Clathrin assembly protein complex 1 sigma-1B small chain) (Golgi adaptor HA1/AP1 adaptin sigma-1B subunit) (Sigma 1B subunit of AP-1 clathrin) (Sigma-adaptin 1B) (Sigma1B-adaptin)	AP1S2 DC22	2	25.6114	25.6464	25.4414	25.2573	24.7977	25.8345	26.0097	24.7296	25.9039	25.5587	24.786	25.3011	25.655	24.8937	25.3322	25.5933	24.9121	24.8364	24.5766	24.5262	24.6555	25.003	24.7471	24.6636	24.7206	24.7745	25.4223	26.333	25.025	25.5632	25.4145	25.3785	25.7116	24.9644	24.7122	25.1291	25.4272	25.4503	25.1943	25.5177	25.7143	25.1416	25.518	24.6859	26.4249
O95782	AP2A1_HUMAN	AP-2 complex subunit alpha-1 (100 kDa coated vesicle protein A) (Adaptor protein complex AP-2 subunit alpha-1) (Adaptor-related protein complex 2 subunit alpha-1) (Alpha-adaptin A) (Alpha1-adaptin) (Clathrin assembly protein complex 2 alpha-A large chain) (Plasma membrane adaptor HA2/AP2 adaptin alpha A subunit)	AP2A1 ADTAA CLAPA1	22	29.6813	30.1181	29.5982	29.513	28.9671	29.9471	29.7708	29.2886	29.7961	30.1119	29.0004	29.8035	29.9845	29.8657	30.089	30.2828	29.0593	29.804	29.2913	29.3707	29.2687	29.4854	29.5053	29.9642	29.6697	29.7233	29.547	30.2187	29.919	30.1395	30.0665	29.8235	30.0473	29.5368	29.8738	28.9398	29.9619	29.964	29.5242	29.7344	29.8157	29.1471	29.5944	30.0919	30.2452
O94973	AP2A2_HUMAN	AP-2 complex subunit alpha-2 (100 kDa coated vesicle protein C) (Adaptor protein complex AP-2 subunit alpha-2) (Adaptor-related protein complex 2 subunit alpha-2) (Alpha-adaptin C) (Alpha2-adaptin) (Clathrin assembly protein complex 2 alpha-C large chain) (Huntingtin yeast partner J) (Huntingtin-interacting protein 9) (HIP-9) (Huntingtin-interacting protein J) (Plasma membrane adaptor HA2/AP2 ada…	AP2A2 ADTAB CLAPA2 HIP9 HYPJ KIAA0899	24	29.822	30.1288	29.3125	29.3288	28.6377	29.8815	29.8445	28.9972	29.5555	30.0775	28.5805	29.7854	29.9307	29.9	29.9998	30.2006	29.0511	29.7185	28.9895	29.2022	29.1839	29.3454	29.2609	29.7382	29.5932	29.6516	29.3723	30.155	29.6398	30.103	30.1284	29.7774	29.7983	29.4541	29.6437	29.0309	29.9303	29.814	29.6626	29.6346	29.8059	29.156	29.6107	29.8278	31.1959
P63010	AP2B1_HUMAN	AP-2 complex subunit beta (AP105B) (Adaptor protein complex AP-2 subunit beta) (Adaptor-related protein complex 2 subunit beta) (Beta-2-adaptin) (Beta-adaptin) (Clathrin assembly protein complex 2 beta large chain) (Plasma membrane adaptor HA2/AP2 adaptin beta subunit)	AP2B1 ADTB2 CLAPB1	34	30.7077	31.5301	30.6057	30.3006	29.5918	31.0576	31.4188	30.0206	30.4783	31.4577	29.8105	30.7284	30.8229	30.4848	30.9145	30.9984	29.8309	30.8677	29.5641	29.9071	30.143	30.2508	30.2196	30.7494	30.4621	30.4451	30.1487	31.0665	30.5603	30.7869	31.1186	30.8719	31.3447	29.8241	30.7187	29.8655	31.2504	30.6231	31.2001	30.9764	30.6985	29.8278	30.7843	30.6041	31.6035
Q96CW1	AP2M1_HUMAN	AP-2 complex subunit mu (AP-2 mu chain) (Adaptin-mu2) (Adaptor protein complex AP-2 subunit mu) (Adaptor-related protein complex 2 subunit mu) (Clathrin assembly protein complex 2 mu medium chain) (Clathrin coat assembly protein AP50) (Clathrin coat-associated protein AP50) (HA2 50 kDa subunit) (Plasma membrane adaptor AP-2 50 kDa protein)	AP2M1 CLAPM1 KIAA0109	11	27.8475	28.7108	27.8418	27.6574	27.1436	28.0978	27.9945	27.2833	28.1088	28.6995	27.0777	28.1273	28.0657	27.9412	28.3749	28.5456	27.4349	28.1858	27.6548	27.4161	27.7408	27.4172	27.7491	28.2611	27.9414	28.0263	27.6696	28.3799	27.8436	28.2812	28.4284	28.0803	28.4531	27.6373	27.7751	27.1485	28.2181	28.0142	27.8695	27.7622	28.0653	27.1115	27.8347	28.1189	29.547
P53680	AP2S1_HUMAN	AP-2 complex subunit sigma (Adaptor protein complex AP-2 subunit sigma) (Adaptor-related protein complex 2 subunit sigma) (Clathrin assembly protein 2 sigma small chain) (Clathrin coat assembly protein AP17) (Clathrin coat-associated protein AP17) (HA2 17 kDa subunit) (Plasma membrane adaptor AP-2 17 kDa protein) (Sigma2-adaptin)	AP2S1 AP17 CLAPS2	3	25.6619	26.4844	25.2134	25.2517	24.5622	25.5081	25.3653	24.6839	24.7757	25.9356	24.3809	25.5494	25.5663	25.5468	25.8561	26.0835	24.8799	25.56	25.2731	25.3028	25.3041	25.3772	25.4508	25.794	25.5614	25.5807	25.4003	25.7231	25.6834	25.9664	26.0939	25.4796	25.2901	25.1463	25.2813	24.7555	25.4037	25.5518	25.5691	25.2741	25.5849	24.4302	25.2282	26.4878	23.7984
O00203	AP3B1_HUMAN	AP-3 complex subunit beta-1 (Adaptor protein complex AP-3 subunit beta-1) (Adaptor-related protein complex 3 subunit beta-1) (Beta-3A-adaptin) (Clathrin assembly protein complex 3 beta-1 large chain)	AP3B1 ADTB3A	26	28.4443	28.4962	28.2485	27.9771	27.7337	28.7787	28.3224	28.366	28.487	28.527	27.9303	28.1489	27.992	27.7671	28.4444	28.0603	28.2718	27.8692	28.0716	27.7566	27.9872	28.5534	27.9628	28.023	28.1667	28.5231	28.5136	28.7995	27.4319	27.7626	28.0696	28.4729	28.6529	27.6498	27.8968	28.2927	28.4843	27.3294	28.4759	29.1348	28.2551	28.4835	28.7208	27.7638	29.2832
Q13367	AP3B2_HUMAN	AP-3 complex subunit beta-2 (Adaptor protein complex AP-3 subunit beta-2) (Adaptor-related protein complex 3 subunit beta-2) (Beta-3B-adaptin) (Clathrin assembly protein complex 3 beta-2 large chain) (Neuron-specific vesicle coat protein beta-NAP)	AP3B2	9	25.8121	25.6111	25.6857	25.3135	25.5189	25.8659	25.4934	25.4141	25.5665	25.7654	25.5426	25.054	25.3523	25.1494	25.4086	25.2363	25.6089	24.6621	25.2143	25.1636	25.1765	25.7449	25.2683	25.3204	25.4996	25.6787	25.9032	25.7798	24.8644	25.2749	25.1579	25.3793	25.5663	25.257	25.157	25.6728	25.7773	24.8244	25.6135	26.1722	25.6296	25.6332	25.9262	25.2646	26.819
O14617	AP3D1_HUMAN	AP-3 complex subunit delta-1 (AP-3 complex subunit delta) (Adaptor-related protein complex 3 subunit delta-1) (Delta-adaptin)	AP3D1 PRO0039	27	28.9189	29.0304	28.7671	28.5898	28.4548	29.0888	28.6461	28.6096	28.9768	29.0198	28.5239	28.6072	28.8262	28.627	28.8757	28.6784	28.7211	28.5236	28.6832	28.2077	28.479	28.8242	28.2147	28.5098	28.7623	29.0113	29.0893	29.229	28.1757	28.4411	28.6756	28.7676	29.0008	28.4873	28.4381	28.6916	28.9667	28.4024	29.0359	29.3522	28.5868	28.8317	29.1426	28.5962	29.6933
Q9Y2T2	AP3M1_HUMAN	AP-3 complex subunit mu-1 (AP-3 adaptor complex mu3A subunit) (Adaptor-related protein complex 3 subunit mu-1) (Mu-adaptin 3A) (Mu3A-adaptin)	AP3M1	11	27.7045	27.801	27.1771	27.0855	26.7846	27.7478	27.5236	27.3055	27.5751	27.6596	26.9758	27.3195	27.1599	27.1845	27.5705	27.3705	27.5053	27.3405	27.6097	26.9798	27.4756	27.6685	27.274	27.3389	27.316	27.6624	28.0084	27.9205	26.9056	26.7412	27.3654	27.5087	27.8543	27.4949	26.8559	27.7883	27.7355	26.4885	27.8499	27.8695	27.4266	27.4859	27.5394	27.1696	27.6512
P53677	AP3M2_HUMAN	AP-3 complex subunit mu-2 (Adaptor-related protein complex 3 subunit mu-2) (Clathrin assembly protein assembly protein complex 3 mu-2 medium chain) (Clathrin coat assembly protein AP47 homolog 2) (Clathrin coat-associated protein AP47 homolog 2) (Golgi adaptor AP-1 47 kDa protein homolog 2) (HA1 47 kDa subunit homolog 2) (Mu3B-adaptin) (P47B)	AP3M2	6	24.4606	24.8919	24.3836	23.6384	23.8536	25.1764	24.1012	24.0897	24.1331	24.7426	24.168	24.0712	24.3251	24.5518	24.6629	23.8744	24.4378	23.6961	24.3695	23.9141	24.1771	24.103	23.703	24.4015	24.7836	24.7056	24.64	24.9778	23.9611	23.9067	24.1907	24.5121	24.8079	23.9022	23.6338	24.256	24.4324	23.9654	24.677	24.9933	24.1846	24.6868	25.0996	23.9865	25.89
Q92572	AP3S1_HUMAN	AP-3 complex subunit sigma-1 (AP-3 complex subunit sigma-3A) (Adaptor-related protein complex 3 subunit sigma-1) (Clathrin-associated/assembly/adaptor protein, small 3) (Sigma-3A-adaptin) (Sigma3A-adaptin) (Sigma-adaptin 3a)	AP3S1 CLAPS3	2	25.4183	25.2943	25.2727	25.1804	24.7376	25.3815	25.3154	25.0625	24.8848	25.3436	25.5212	25.0402	25.7647	25.4019	25.1337	25.3926	25.2338	25.1914	25.2766	25.1433	24.8922	25.5711	24.9917	25.3251	25.2901	25.4488	25.8969	25.5739	25.2637	25.3325	25.4753	25.0376	25.6196	25.0795	25.1269	25.1924	25.3306	25.713	25.0639	26.0901	25.2904	25.6067	25.1845	25.8965	27.3885
P59780	AP3S2_HUMAN	AP-3 complex subunit sigma-2 (AP-3 complex subunit sigma-3B) (Adaptor-related protein complex 3 subunit sigma-2) (Sigma-3B-adaptin) (Sigma3B-adaptin) (Sigma-adaptin 3b)	AP3S2	3	26.4353	26.5596	26.4604	26.683	26.2683	26.8955	26.4053	25.4778	27.4867	26.7015	26.333	26.7593	27.1372	27.1749	26.7817	26.4923	27.0681	26.6487	26.9972	27.3475	26.8554	27.4905	27.0667	26.6728	26.9438	27.2268	27.5777	27.3046	27.1324	27.0902	26.591	26.5393	26.5146	26.936	25.9025	26.9149	26.1603	26.2331	26.4012	26.2599	26.512	26.6824	26.2402	27.2411	28.9401
P50583	AP4A_HUMAN	Bis(5'-nucleosyl)-tetraphosphatase [asymmetrical] (EC 3.6.1.17) (Diadenosine 5',5'''-P1,P4-tetraphosphate asymmetrical hydrolase) (Ap4A hydrolase) (Ap4Aase) (Diadenosine tetraphosphatase) (Nucleoside diphosphate-linked moiety X motif 2) (Nudix motif 2)	NUDT2 APAH1	2	20.7909	21.029	20.8011	19.4209	21.7188	19.9091	20.3707	22.866	20.0998	20.5027	20.9936	21.7133	20.105	19.9356	21.6353	20.5443	20.7415	19.6839	20.5303	19.7292	21.3647	21.6108	20.4549	20.0545	18.7243	21.4766	22.1712	19.6928	18.0588	21.1137	21.4189	20.5882	21.5235	21.0709	20.544	21.9057	21.5531	20.0252	22.3842	21.2764	19.805	22.6697	20.8328	19.2258	21.1469
Q2VPB7	AP5B1_HUMAN	AP-5 complex subunit beta-1 (Adaptor-related protein complex 5 beta subunit) (Beta5)	AP5B1 PP1030	7	23.4265	24.1769	23.723	24.3975	23.7665	24.5235	23.7859	24.79	24.2939	23.618	23.5228	23.5564	23.6066	23.2583	23.9884	23.473	24.561	23.4179	24.4463	24.3203	24.8176	24.5836	24.3164	23.0533	23.8544	24.9157	24.7927	24.0302	22.8718	24.623	23.1117	24.1533	24.56	24.6205	23.7927	24.1319	24.5255	22.998	23.623	24.2448	23.927	24.5229	23.4877	22.7792	24.0156
Q9H0R1	AP5M1_HUMAN	AP-5 complex subunit mu-1 (Adaptor-related protein complex 5 subunit mu-1) (Mu5) (Mu-2-related death-inducing protein) (MuD) (Putative HIV-1 infection-related protein)	AP5M1 C14orf108 MUDENG	2	22.4256	23.1101	22.1042	22.1319	20.7996	22.0004	21.8191	22.3588	21.4921	22.3233	22.0752	22.2095	21.1338	21.3333	22.5028	22.0198	22.6796	22.2188	22.8165	22.3443	22.2699	22.0009	22.2944	21.6883	21.4599	22.8932	22.4121	22.1821	21.0017	21.4071	21.8017	21.9801	22.3778	21.7998	21.9365	22.3459	22.4646	20.4717	22.8138	22.7015	21.1508	22.3372	21.8898	20.7212	21.6341
Q9NUS5	AP5S1_HUMAN	AP-5 complex subunit sigma-1 (Adaptor-related protein complex 5 sigma subunit) (Sigma5)	AP5S1 C20orf29	2	20.3283	20.6867	20.2867	20.9976	20.8228	20.0172	20.6097	21.6952	21.8593	20.4304	19.552	19.543	20.4513	20.2172	19.4822	20.3341	21.232	19.5411	21.2703	21.0774	21.527	21.7296	20.8995	18.0085	20.542	21.7963	21.6915	20.2389	19.5843	21.4578	19.7791	19.5991	20.3292	20.5686	20.1108	20.8565	20.2339	19.7878	20.0856	21.0582	20.4219	21.453	20.4808	20.7531	21.2376
O43299	AP5Z1_HUMAN	AP-5 complex subunit zeta-1 (Adaptor-related protein complex 5 zeta subunit) (Zeta5)	AP5Z1 KIAA0415 SPG48	3	21.6985	21.8748	20.6259	22.7248	21.9578	21.7973	21.9264	23.0309	23.1694	21.5734	21.3331	21.7916	22.0173	20.7615	21.9589	21.6106	22.599	21.5798	22.8305	22.5623	23.117	23.2042	22.3488	20.4199	21.8358	23.4762	23.3247	22.7359	20.0068	22.9285	20.9011	21.4572	21.519	22.3031	21.7332	22.2065	22.331	21.0607	21.4803	21.8694	22.222	22.8059	21.5188	20.4801	22.4299
O00213	APBB1_HUMAN	Amyloid-beta A4 precursor protein-binding family B member 1 (Protein Fe65)	APBB1 FE65 RIR	2	19.8833	20.5847	18.7596	22.0604	20.3838	21.6414	21.7033	21.7657	22.6415	21.4661	20.4856	19.5241	20.8705	20.3658	20.7827	21.7089	22.3538	18.0686	22.4184	22.013	21.8715	22.6162	22.3383	19.5909	21.1558	22.9593	22.6108	20.4821	20.6247	21.7921	19.271	18.1521	20.0777	21.9405	22.0179	22.3845	21.5282	20.2018	21.0285	20.2723	20.9607	21.7649	20.8427	19.8196	21.9304
P25054	APC_HUMAN	Adenomatous polyposis coli protein (Protein APC) (Deleted in polyposis 2.5)	APC DP2.5	7	23.503	24.7391	24.9606	24.2281	24.2405	24.9404	25.0665	24.7891	24.8774	24.9967	24.3101	24.326	23.7336	23.8154	24.2997	24.6675	24.1397	24.5915	24.3999	23.7466	24.7715	23.875	24.039	24.8273	24.2114	24.484	23.8607	23.861	24.2682	23.875	24.3191	24.6322	25.6046	24.249	25.1293	23.8889	24.9008	24.3072	24.1577	23.8255	24.3648	24.5045	24.5689	24.538	24.213
Q9H1A4	APC1_HUMAN	Anaphase-promoting complex subunit 1 (APC1) (Cyclosome subunit 1) (Mitotic checkpoint regulator) (Testis-specific gene 24 protein)	ANAPC1 TSG24	3	20.5397	21.6611	20.3851	21.6514	21.5789	20.2186	20.6992	21.7395	22.634	20.9508	20.9024	21.1219	20.5264	20.5231	20.6321	20.6388	22.3112	20.4497	22.3605	21.7393	21.1171	22.485	21.4935	20.646	21.177	22.2023	22.1935	20.7394	20.9863	21.5861	20.8033	21.4158	21.5895	20.8853	20.8587	21.4278	20.8411	20.6767	21.1094	20.6057	21.0584	22.0837	20.5302	20.6933	20.6693
Q9UJX4	APC5_HUMAN	Anaphase-promoting complex subunit 5 (APC5) (Cyclosome subunit 5)	ANAPC5 APC5	2	23.0691	22.673	22.423	22.5934	21.1251	21.4832	22.3327	21.6775	21.9316	22.6314	22.4888	21.1511	20.5603	21.7639	21.3478	18.0885	21.443	21.396	21.505	20.0136	20.6896	20.9342	20.7782	20.6839	21.1234	21.3918	21.1595	21.9314	18.2167	20.7202	20.8963	21.5548	22.2246	20.7413	21.4787	21.0554	21.2849	22.2267	22.9231	23.0136	22.2118	22.0867	22.1593	19.6158	23.5855
Q9UJX3	APC7_HUMAN	Anaphase-promoting complex subunit 7 (APC7) (Cyclosome subunit 7)	ANAPC7 APC7	6	22.6193	22.6985	22.0896	23.0763	22.8318	22.6672	23.0485	23.4954	23.8807	22.2926	22.468	22.9945	22.9101	22.6264	22.6964	22.7532	23.4921	22.5688	23.4754	23.1012	23.3073	23.8564	22.8587	22.1449	22.7152	23.343	23.7226	23.3522	22.0149	22.9334	22.2946	22.4688	22.3357	22.9805	22.6172	23.3453	22.6753	22.3541	21.8852	22.6715	22.9442	23.1541	22.329	21.9536	25.4064
P27695	APEX1_HUMAN	DNA-(apurinic or apyrimidinic site) endonuclease (EC 3.1.-.-) (APEX nuclease) (APEN) (Apurinic-apyrimidinic endonuclease 1) (AP endonuclease 1) (APE-1) (REF-1) (Redox factor-1) [Cleaved into: DNA-(apurinic or apyrimidinic site) endonuclease, mitochondrial]	APEX1 APE APE1 APEX APX HAP1 REF1	11	25.4523	25.9114	25.771	24.8187	24.5577	25.1088	24.9621	24.7829	24.6465	25.6429	25.6005	25.4336	25.3871	25.3313	26.0229	25.825	24.5507	25.1326	24.3795	23.1564	24.1942	23.7681	23.9258	24.7484	25.2323	24.6852	24.1677	25.9035	23.719	23.8983	25.8607	25.3622	26.1023	24.2008	24.4804	23.9716	25.6399	24.3247	25.9786	25.8512	24.0544	24.3803	25.6387	24.8144	26.6122
Q96BI3	APH1A_HUMAN	Gamma-secretase subunit APH-1A (APH-1a) (Aph-1alpha) (Presenilin-stabilization factor)	APH1A PSF CGI-78 UNQ579/PRO1141	2	22.9376	23.3127	22.6421	23.4488	23.4718	23.7742	23.6984	23.2421	23.4248	23.384	23.4891	22.8184	23.8021	23.8217	23.3588	23.0992	22.4531	23.1166	22.952	23.6442	22.6963	23.1126	23.2073	23.2578	22.9259	23.0065	23.617	23.4964	24.0578	23.7921	23.2896	23.1173	23.9013	23.4776	23.3868	22.5375	23.215	23.7797	22.5777	22.5854	23.4731	22.6652	23.3408	23.8715	26.1562
Q9BZZ5	API5_HUMAN	Apoptosis inhibitor 5 (API-5) (Antiapoptosis clone 11 protein) (AAC-11) (Cell migration-inducing gene 8 protein) (Fibroblast growth factor 2-interacting factor) (FIF) (Protein XAGL)	API5 MIG8	7	24.4014	24.9886	24.9046	24.5512	23.6508	25.0304	24.642	24.0119	23.2825	24.8432	24.5951	24.3146	24.989	24.2567	24.4554	24.1812	23.8214	24.0857	23.6835	23.4161	23.078	23.3556	23.9716	23.8254	23.9249	24.2964	23.8668	25.0672	22.9494	23.2195	24.0015	24.3054	25.351	22.6236	24.2397	23.9885	24.7602	23.4181	24.8165	25.3025	24.5661	23.7395	24.8596	24.1103	24.5548
Q06481	APLP2_HUMAN	Amyloid-like protein 2 (APLP-2) (APPH) (Amyloid protein homolog) (CDEI box-binding protein) (CDEBP)	APLP2 APPL2	18	26.4325	27.6323	27.28	27.0198	27.206	27.5682	27.4971	27.5428	27.7219	27.2484	27.3435	27.4877	27.1994	26.8194	27.659	27.5502	27.0945	27.4138	27.555	27.6023	27.5028	27.2432	27.6438	27.7979	27.5005	27.6094	27.6746	27.7024	27.7401	27.503	27.1705	27.0282	28.0504	26.9615	27.0147	26.8208	27.0812	27.4973	26.439	27.3907	26.985	26.6106	27.3461	28.2162	28.8111
Q9HDC9	APMAP_HUMAN	Adipocyte plasma membrane-associated protein (Protein BSCv)	APMAP C20orf3 UNQ1869/PRO4305	21	31.0996	32.276	31.4682	31.2479	31.6909	32.0667	31.9864	31.8184	32.2633	31.4058	31.3673	31.7906	31.3827	31.3664	31.3829	31.8586	31.4914	31.8244	31.4428	31.7628	31.7591	31.8258	31.7856	31.739	31.6824	31.6227	31.7234	32.0114	31.8998	31.5183	31.2546	31.6751	32.6396	32.0136	31.7669	31.7685	31.8736	31.6518	31.1884	31.4983	31.5256	31.2796	32.005	31.9855	32.9204
P08519	APOA_HUMAN	Apolipoprotein(a) (Apo(a)) (Lp(a)) (EC 3.4.21.-)	LPA	2	19.2371	0.86056	17.648	20.078	16.9474	18.5885	18.1885	18.4566	20.3515	17.1934	17.957	17.2127	19.063	16.8225	19.0722	18.5651	18.9133	20.2759	17.1331	20.2016	17.7086	19.6601	17.6771	19.4525	18.604	18.2122	19.3284	17.674	20.1248	21.2558	16.3236	18.1712	15.8454	24.3726	21.5739	19.3322	18.3693	20.6304	18.1458	18.4859	18.7853	19.0058	19.0961	17.6659	22.128
P02647	APOA1_HUMAN	Apolipoprotein A-I (Apo-AI) (ApoA-I) (Apolipoprotein A1) [Cleaved into: Proapolipoprotein A-I (ProapoA-I); Truncated apolipoprotein A-I (Apolipoprotein A-I(1-242))]	APOA1	15	28.7414	27.4614	26.5907	28.0377	26.4667	26.6051	25.8626	26.2198	27.0893	26.3066	25.6287	26.1666	29.2242	28.8649	26.7565	27.7577	27.8137	28.5647	26.7744	28.7148	26.6876	27.0607	27.2928	27.6971	27.1744	26.3753	27.2503	27.0168	28.7237	26.2663	26.5181	25.8488	25.3372	29.9439	28.3221	29.7251	26.5417	29.2847	28.2643	26.7095	26.7839	28.014	26.6316	27.5834	30.101
P02652	APOA2_HUMAN	Apolipoprotein A-II (Apo-AII) (ApoA-II) (Apolipoprotein A2) [Cleaved into: Proapolipoprotein A-II (ProapoA-II); Truncated apolipoprotein A-II (Apolipoprotein A-II(1-76))]	APOA2	4	25.3642	25.5172	23.6252	25.0798	24.1651	23.7818	21.3365	23.8234	24.1421	22.559	22.433	23.251	25.9071	25.3993	23.1652	24.2363	24.2264	24.5858	25.5965	25.5312	23.4693	24.025	23.6144	23.835	23.7985	23.3799	24.2316	23.8356	26.1566	23.456	23.5189	22.7277	21.9873	27.7644	25.4345	26.6914	23.9265	25.9637	24.3957	22.967	23.3869	24.3701	22.7319	24.3965	28.4348
P06727	APOA4_HUMAN	Apolipoprotein A-IV (Apo-AIV) (ApoA-IV) (Apolipoprotein A4)	APOA4	12	25.3805	24.7531	25.2352	27.9825	25.1058	24.8625	24.3588	24.4746	26.1843	24.6181	24.3965	24.558	27.327	25.7442	25.3221	24.5172	26.5895	26.971	24.8025	27.0401	25.2936	23.5077	24.5002	25.2168	24.6151	23.8778	25.3183	25.5792	26.9844	24.7759	24.654	24.8658	24.5341	27.0695	25.7363	27.0305	25.1654	27.5367	23.7551	24.1633	24.5112	25.9725	24.0646	25.2789	29.0915
Q6Q788	APOA5_HUMAN	Apolipoprotein A-V (Apo-AV) (ApoA-V) (Apolipoprotein A5) (Regeneration-associated protein 3)	APOA5 RAP3 UNQ411/PRO773	5	21.6522	20.7619	22.6175	26.1927	21.2563	20.6274	20.7126	21.0195	21.3648	21.2255	20.0678	21.2874	25.0302	20.2124	23.1287	20.9471	25.732	26.0612	21.6445	24.8319	20.4127	20.6648	22.8568	22.8587	22.4723	20.5348	20.9571	23.0808	25.5135	23.8641	20.227	22.7109	20.7894	22.9099	22.418	20.7462	20.7292	26.411	21.2138	21.6865	20.3316	23.3867	20.0431	20.5829	27.3134
P02654	APOC1_HUMAN	Apolipoprotein C-I (Apo-CI) (ApoC-I) (Apolipoprotein C1) [Cleaved into: Truncated apolipoprotein C-I]	APOC1	3	25.5285	23.0578	23.8863	25.8551	22.6785	21.8719	21.6796	22.6118	24.5465	21.57	23.9325	22.6623	26.1856	25.5745	24.2385	23.3966	25.1058	26.059	24.8387	26.6913	24.8986	26.0169	24.4457	23.7689	24.577	21.4456	25.1614	23.9649	26.4292	27.043	23.6502	22.9316	20.9451	28.6198	26.6356	27.4117	22.3049	27.1934	24.0989	22.3846	23.1858	25.1003	22.1184	24.8822	28.5093
P02655	APOC2_HUMAN	Apolipoprotein C-II (Apo-CII) (ApoC-II) (Apolipoprotein C2) [Cleaved into: Proapolipoprotein C-II (ProapoC-II)]	APOC2 APC2	2	21.3602	20.9111	19.037	22.538	20.6116	21.0111	19.9334	19.2728	20.509	20.4248	23.0227	19.8346	23.7994	23.1544	20.3695	20.5295	21.2034	21.0841	24.0444	23.5874	21.0599	23.2207	22.3606	22.4645	21.3319	20.8555	21.9269	20.1041	25.8748	22.9459	20.9836	19.2521	18.3983	25.8896	25.5441	26.6931	21.7732	24.0191	22.6222	21.2648	20.399	21.8384	20.4665	23.6048	25.7003
P02656	APOC3_HUMAN	Apolipoprotein C-III (Apo-CIII) (ApoC-III) (Apolipoprotein C3)	APOC3	3	26.4696	25.5469	24.1654	26.201	25.2753	24.487	24.5319	24.9289	25.2222	25.6012	26.0636	24.5005	27.8103	27.2149	24.9748	25.6855	26.3649	25.7328	26.724	27.2695	25.9622	27.14	27.0678	26.1701	25.8745	25.0566	25.8233	24.312	28.5172	27.1653	24.7944	23.3064	24.5178	29.3167	28.1997	30.4049	25.137	27.5438	26.5799	25.6245	24.7715	25.8624	24.3456	27.2112	30.413
P05090	APOD_HUMAN	Apolipoprotein D (Apo-D) (ApoD)	APOD	7	26.6666	26.8076	26.144	26.932	25.6984	26.4843	26.1755	26.5485	28.3287	27.2654	25.9097	25.6563	27.4753	27.899	25.7769	25.7451	26.6581	26.5908	25.9982	26.9541	26.2066	27.4116	26.3004	25.9345	25.8482	24.6392	25.8539	26.4979	29.1942	28.3801	27.0091	26.6488	26.0229	29.8877	28.8659	29.5038	28.0583	27.6922	27.6862	26.481	26.1495	26.4129	26.2214	27.2683	29.0961
P02649	APOE_HUMAN	Apolipoprotein E (Apo-E)	APOE	16	28.4428	28.1241	30.1834	31.4735	28.1349	28.1554	28.7088	28.4643	29.0936	27.889	27.6356	28.8186	31.2701	28.4067	29.5232	28.6603	30.8115	31.7251	29.112	30.8984	28.9892	28.1999	29.5083	29.3971	29.4117	27.4001	28.6859	30.1465	30.5213	28.6577	28.4606	29.0019	28.4782	30.7444	29.6478	28.8141	28.3574	32.349	28.453	28.6997	28.3395	29.961	28.1215	28.9146	33.7364
P02749	APOH_HUMAN	Beta-2-glycoprotein 1 (APC inhibitor) (Activated protein C-binding protein) (Anticardiolipin cofactor) (Apolipoprotein H) (Apo-H) (Beta-2-glycoprotein I) (B2GPI) (Beta(2)GPI)	APOH B2G1	13	29.8735	30.8924	30.0702	29.2933	29.6738	30.3407	29.9433	29.6592	30.092	30.391	29.5679	29.4028	30.7567	29.89	29.6299	30.2543	29.6767	30.4651	30.2466	30.5588	30.0947	30.2324	29.9283	29.8639	29.072	29.1635	29.2191	29.6174	31.0888	30.0192	29.6983	29.7848	30.4633	32.7109	31.3966	31.0918	30.3167	30.3971	30.1321	29.9369	29.4958	29.76	29.6392	29.6805	30.6675
Q9BQE5	APOL2_HUMAN	Apolipoprotein L2 (Apolipoprotein L-II) (ApoL-II)	APOL2	2	19.6929	20.7196	19.0464	19.8374	19.7327	19.3833	20.0467	19.6543	22.1568	19.7279	19.3149	20.2141	20.372	19.5849	20.3037	19.7044	19.6737	19.7134	20.0077	20.2508	19.6031	20.5153	19.7752	20.1277	21.1929	19.8977	20.425	20.7245	20.7569	21.0128	20.2243	19.7899	20.106	21.8395	19.4821	18.9809	19.3238	20.9188	18.1371	20.2588	19.1915	20.258	19.1523	19.3361	22.0249
P07741	APT_HUMAN	Adenine phosphoribosyltransferase (APRT) (EC 2.4.2.7)	APRT	2	23.4327	24.3967	24.224	23.6994	21.4571	24.1059	23.3727	23.9727	22.841	23.7152	23.4035	24.1108	23.2166	23.7014	24.2966	23.4536	23.9228	24.0157	23.726	23.6625	23.3142	23.559	23.6932	23.1617	23.2116	23.7768	25.0493	24.2549	23.091	22.5518	24.0932	24.2041	24.6099	24.0082	23.163	24.4545	24.0739	22.9525	24.7597	24.497	23.0273	23.2034	23.8221	22.4583	22.2648
Q8NBQ7	AQP11_HUMAN	Aquaporin-11 (AQP-11)	AQP11 AQPX1 PSEC0027	2	24.0661	25.7925	24.6204	24.4114	24.874	25.0999	25.4649	25.2296	25.2296	24.8794	24.5232	24.2382	23.1018	23.0141	24.1189	24.8371	24.6413	24.4274	24.5073	24.4626	24.8376	24.3755	24.4556	24.6818	24.2995	24.685	23.5124	22.7518	23.3603	23.5833	24.2153	24.4288	26.0178	24.8744	25.2529	25.0706	25.1802	23.7677	24.1419	24.7303	24.4934	24.8711	25.0702	22.9372	23.8924
P55087	AQP4_HUMAN	Aquaporin-4 (AQP-4) (Mercurial-insensitive water channel) (MIWC) (WCH4)	AQP4	2	17.988	17.7765	18.0084	18.7834	18.3418	17.9013	16.4319	19.4657	19.2603	16.5585	18.5791	17.7655	19.5578	16.6299	18.9079	17.3588	20.1147	19.5962	21.4851	21.2941	19.336	17.9642	21.0855	15.8101	17.0403	19.3651	21.5414	16.1252	23.6463	21.5828	17.2115	18.2416	16.5176	20.9025	19.8243	20.1968	21.0845	19.2516	17.3514	15.5385	16.7424	17.9612	16.1867	22.7103	22.3935
Q3SXY8	AR13B_HUMAN	ADP-ribosylation factor-like protein 13B (ADP-ribosylation factor-like protein 2-like 1) (ARL2-like protein 1)	ARL13B ARL2L1	2	21.5454	21.0017	18.9996	21.5585	18.2561	21.318	20.8986	20.7326	20.3688	20.7115	19.3723	20.073	21.2651	21.4032	20.4366	19.4763	20.2472	20.3724	21.7647	20.8443	19.713	20.8998	20.0046	20.0044	19.3658	20.693	20.8909	20.762	20.2369	18.4776	21.4973	21.1905	21.2413	23.7737	22.9348	22.4819	22.0117	21.8352	21.8746	20.9798	21.2077	20.5642	20.3899	21.7751	21.9488
Q15041	AR6P1_HUMAN	ADP-ribosylation factor-like protein 6-interacting protein 1 (ARL-6-interacting protein 1) (Aip-1) (Apoptotic regulator in the membrane of the endoplasmic reticulum)	ARL6IP1 ARL6IP ARMER KIAA0069	6	26.0215	27.4624	27.5096	27.0941	27.3118	27.3612	27.498	27.2633	28.5125	27.2402	26.8704	26.9289	26.2265	26.3085	26.9556	26.9642	26.6786	26.9554	27.6772	26.9212	26.8513	26.8651	26.748	26.8105	26.7076	26.9712	26.9055	27.0771	26.6371	26.4977	27.0973	27.1316	28.2088	27.7612	27.4679	27.3908	27.4631	26.7757	26.5666	27.8501	27.1816	26.888	26.6319	27.2618	28.3819
P10398	ARAF_HUMAN	Serine/threonine-protein kinase A-Raf (EC 2.7.11.1) (Proto-oncogene A-Raf) (Proto-oncogene A-Raf-1) (Proto-oncogene Pks)	ARAF ARAF1 PKS PKS2	10	24.8236	24.8795	25.4517	25.5234	25.7438	25.3052	25.7969	26.0393	26.7362	25.6441	25.578	25.2885	24.9333	24.9805	25.2608	25.2806	25.9518	24.0598	25.7691	25.9444	25.9004	25.8695	25.6742	25.4698	25.6477	26.096	26.1685	25.6689	25.4197	25.7799	24.9258	24.9389	26.0114	25.5922	26.432	25.9332	25.6372	25.1271	24.772	26.8924	25.4702	25.9676	25.5035	25.528	27.3919
Q96P48	ARAP1_HUMAN	Arf-GAP with Rho-GAP domain, ANK repeat and PH domain-containing protein 1 (Centaurin-delta-2) (Cnt-d2)	ARAP1 CENTD2 KIAA0782	12	25.5047	26.3689	25.356	25.7448	26.0421	25.7888	26.2169	26.2678	26.3745	25.7083	24.9782	25.7162	25.3216	25.4746	25.7345	25.1898	26.6661	25.7733	26.565	25.941	26.323	26.6978	25.8767	25.4583	25.9926	26.7486	26.8341	25.9846	24.9212	26.1825	25.7605	25.0698	26.3112	26.3691	25.6937	26.0142	26.502	24.6978	25.9031	26.1046	25.8254	26.306	25.8935	25.175	27.8495
Q92747	ARC1A_HUMAN	Actin-related protein 2/3 complex subunit 1A (SOP2-like protein)	ARPC1A SOP2L	5	23.2991	24.3329	23.5719	22.6129	22.5552	23.6545	24.0581	22.5346	22.1836	24.1636	22.9869	22.752	22.7737	22.0007	22.7316	22.5389	22.1513	22.8898	22.1708	22.4226	22.0189	22.2584	21.7438	22.1327	22.8167	22.6787	21.9961	22.0427	21.5195	22.412	22.8665	23.3204	24.5059	22.4423	23.7906	23.203	24.3413	22.6823	24.7438	23.4259	23.1016	23.144	23.6778	20.8818	22.5979
O15143	ARC1B_HUMAN	Actin-related protein 2/3 complex subunit 1B (Arp2/3 complex 41 kDa subunit) (p41-ARC)	ARPC1B ARC41	6	27.3142	27.6788	27.3453	27.0978	26.5519	27.6508	27.8525	26.9278	27.4453	27.6441	27.0653	27.1883	27.0868	26.9393	27.3929	27.2095	26.409	27.253	26.5358	26.9455	26.5612	26.732	26.64	26.8796	26.9219	26.8507	26.7853	27.6745	26.1457	26.6642	27.0318	27.2807	27.8708	27.787	27.523	26.81	27.8907	27.152	27.5384	27.9256	27.2596	26.8192	27.4782	26.6406	28.866
O15033	AREL1_HUMAN	Apoptosis-resistant E3 ubiquitin protein ligase 1 (EC 2.3.2.26) (Apoptosis-resistant HECT-type E3 ubiquitin transferase 1)	AREL1 KIAA0317	2	21.9577	23.5545	23.6561	23.3233	22.7313	23.2837	23.7626	22.6114	22.718	24.0764	22.7899	22.2808	22.5868	22.7982	22.405	23.404	22.2929	22.6745	21.9809	22.1988	22.2962	22.5094	22.138	22.5158	22.6624	22.843	22.8715	22.3495	22.931	22.612	22.545	22.7149	23.6911	22.9441	23.8268	22.1815	22.8739	23.4928	23.5735	22.8241	22.8062	22.9579	23.0568	22.8812	24.7479
P84077	ARF1_HUMAN	ADP-ribosylation factor 1	ARF1	10	30.9663	31.7494	31.375	30.4172	30.6226	31.205	31.26	31.3742	31.1633	30.9039	31.0032	31.1525	30.5824	30.6931	31.2475	31.3924	30.7963	31.0595	30.4011	30.7654	30.7808	31.0862	30.9515	31.0926	31.2353	31.0821	31.2632	31.0524	30.674	30.8362	31.4288	31.0674	31.9251	31.0589	30.7344	31.1817	31.5878	30.1106	31.3877	31.5517	30.8039	30.4432	31.7321	30.5485	31.8493
P61204	ARF3_HUMAN	ADP-ribosylation factor 3	ARF3	10	30.9663	31.7494	31.375	30.4172	30.6226	31.205	31.26	31.3742	31.1633	30.9039	31.0032	31.1525	30.5824	30.6931	31.2475	31.3924	30.7963	31.0595	30.4011	30.7654	30.7808	31.0862	30.9515	31.0926	31.2353	31.0821	31.2632	31.0524	30.674	30.8362	31.4288	31.0674	31.9251	31.0589	30.7344	31.1817	31.5878	30.1106	31.3877	31.5517	30.8039	30.4432	31.7321	30.5485	31.8493
P18085	ARF4_HUMAN	ADP-ribosylation factor 4	ARF4 ARF2	8	29.6027	30.514	29.9844	29.6381	29.9101	30.1783	30.0179	31.4631	30.8356	29.5048	29.6539	29.793	28.9962	29.1702	30.1591	30.4064	30.9062	29.552	30.2497	30.9453	30.8088	31.3305	31.1207	30.3059	30.4314	30.803	31.5004	29.544	30.3065	31.0821	29.9592	29.5872	30.7763	30.9237	30.2555	30.9104	30.3521	28.7767	29.998	30.3367	29.3331	30.2464	30.7667	30.4011	29.5855
P84085	ARF5_HUMAN	ADP-ribosylation factor 5	ARF5	9	30.5386	31.3012	30.8665	29.8537	30.2831	30.6908	30.6713	31.0685	30.8316	30.361	30.4016	30.4224	29.8331	30.0826	30.4999	30.6783	30.2889	30.2967	29.5349	30.3218	30.192	30.5735	30.5206	30.5695	30.6269	30.5039	30.8033	30.3142	30.1306	30.4507	30.6935	30.3591	31.4232	30.6778	30.3241	30.7952	31.1226	29.5978	30.8354	30.9989	30.1474	30.0075	31.2268	29.8809	31.1911
P62330	ARF6_HUMAN	ADP-ribosylation factor 6	ARF6	5	28.5355	28.9576	28.4963	28.4277	28.56	28.7465	28.9612	30.6064	29.7796	28.7578	27.9893	28.7899	29.0757	29.2637	29.0162	29.1195	29.8104	28.6151	29.3666	29.4386	29.5954	30.3284	29.5228	28.3927	29.3953	29.9005	30.2696	29.2953	29.018	30.0394	29.2807	28.7499	29.3141	29.3881	29.5187	30.1596	29.4611	28.2158	28.6944	28.769	28.7211	29.9283	29.1759	28.5835	29.9668
Q8N6T3	ARFG1_HUMAN	ADP-ribosylation factor GTPase-activating protein 1 (ARF GAP 1) (ADP-ribosylation factor 1 GTPase-activating protein) (ARF1 GAP) (ARF1-directed GTPase-activating protein)	ARFGAP1 ARF1GAP	7	25.2134	24.7019	24.8715	26.0744	26.4938	25.5292	25.5672	26.0148	25.9893	24.7682	26.1442	25.5306	24.992	24.5587	25.9676	25.7673	26.6149	24.9065	26.4711	26.3049	26.2076	26.3139	25.9135	25.3278	25.4492	26.5734	26.7662	26.1533	25.1406	26.4404	25.5007	25.2393	25.4556	25.6157	25.4428	25.4798	25.374	24.7028	24.4098	25.1755	25.2505	26.3213	25.4576	24.6125	26.3833
Q8N6H7	ARFG2_HUMAN	ADP-ribosylation factor GTPase-activating protein 2 (ARF GAP 2) (GTPase-activating protein ZNF289) (Zinc finger protein 289)	ARFGAP2 ZNF289 Nbla10535	10	24.6084	25.486	25.2622	26.3176	27.734	25.1335	26.3606	27.1497	27.6124	25.9108	26.6765	25.7701	25.1276	24.8974	25.9827	25.4394	27.196	25.1154	27.1407	26.8312	27.1407	27.3124	26.9333	25.6592	26.3554	27.3796	27.3985	26.0569	25.1078	27.1092	25.5631	25.5533	25.5674	25.9181	25.9408	26.8796	25.9585	24.9499	25.1857	26.2358	25.6978	27.4138	25.2756	25.0143	25.9325
Q9NP61	ARFG3_HUMAN	ADP-ribosylation factor GTPase-activating protein 3 (ARF GAP 3)	ARFGAP3 ARFGAP1	9	23.7973	25.4243	25.3367	25.6539	25.9804	25.5298	25.1678	25.8359	26.2597	25.1955	25.585	25.4016	24.8786	24.4604	24.4097	24.8124	26.0871	24.9611	26.1949	25.8097	25.964	25.8488	25.8084	24.7071	25.1263	26.0989	26.0368	25.6836	24.3595	25.7111	24.618	24.7935	25.7955	24.6731	25.3044	25.5572	25.1851	24.2767	24.2271	25.3794	24.4541	26.1769	24.9674	24.3702	25.3166
P53367	ARFP1_HUMAN	Arfaptin-1 (ADP-ribosylation factor-interacting protein 1)	ARFIP1	8	26.7153	27.3154	26.8019	26.4567	26.3923	26.9482	26.6118	26.0234	26.8254	26.6943	26.7709	26.0758	26.195	25.6326	25.8878	27.1779	26.0595	25.9015	25.4639	25.7244	26.0377	26.1686	26.0478	25.8539	26.6154	25.8749	25.7106	27.517	25.798	25.8102	26.7978	26.2284	27.4452	25.6817	26.9268	26.3318	26.9525	25.9853	26.7188	27.174	26.0734	26.4242	27.1721	26.5293	28.853
P53365	ARFP2_HUMAN	Arfaptin-2 (ADP-ribosylation factor-interacting protein 2) (Partner of RAC1) (Protein POR1)	ARFIP2 POR1	3	20.5962	21.7125	21.1755	21.0647	19.1436	21.4535	20.7207	21.2386	22.0065	20.6945	21.3175	21.6217	21.8952	20.9867	21.7783	22.0366	22.176	20.3728	21.557	20.8538	21.224	21.324	21.136	20.9593	21.2945	21.5299	21.2939	22.3558	19.2926	21.6334	21.2266	21.0576	21.3679	21.428	19.7212	20.8444	19.8009	19.8631	20.9204	21.7268	20.7905	21.1057	21.765	20.6151	23.4939
Q13795	ARFRP_HUMAN	ADP-ribosylation factor-related protein 1 (ARF-related protein 1) (ARP)	ARFRP1 ARP1	3	24.3909	25.3568	24.1499	24.6681	25.69	23.8966	24.3482	24.0205	25.311	24.0514	23.7243	24.3235	24.5665	24.9437	23.9499	24.4843	24.0332	24.3921	24.6496	24.9914	24.6498	24.6249	25.1959	24.8429	25.1104	24.1622	24.9578	24.7098	24.888	24.8063	24.3058	23.7291	24.6082	24.043	23.7172	23.8658	27.1709	25.2156	23.4584	23.7464	24.5238	25.3291	24.2926	26.0432	27.2202
Q9HCE6	ARGAL_HUMAN	Rho guanine nucleotide exchange factor 10-like protein (GrinchGEF)	ARHGEF10L GRINCHGEF KIAA1626	14	25.4067	25.5717	25.4332	26.2692	25.9877	25.9478	26.0535	26.3873	27.1669	25.8443	25.6044	25.9106	26.3138	26.1417	26.1055	25.9375	26.8003	25.7814	26.5907	26.731	26.5995	26.7698	26.6233	25.8677	26.3609	26.6616	27.1213	26.4289	26.3278	26.4097	25.871	25.7373	25.9822	25.5617	26.19	26.2344	26.5163	26.0009	25.4443	25.7281	25.4983	26.6619	25.8594	25.8827	27.0731
A1IGU5	ARH37_HUMAN	Rho guanine nucleotide exchange factor 37	ARHGEF37	12	26.8925	27.3378	26.886	26.4398	26.1478	27.2945	27.1244	26.7185	26.4564	26.853	26.4827	26.8987	27.3053	26.752	26.8827	26.7096	27.0629	26.9702	26.5858	26.491	26.5868	27.2268	26.6946	26.2722	26.9239	27.1358	27.4881	27.7095	26.1224	26.8864	26.7696	26.8436	27.0185	25.9142	26.6393	27.7403	27.1088	26.5112	27.0739	26.9348	26.8087	26.4839	27.0392	26.5889	29.7211
Q92888	ARHG1_HUMAN	Rho guanine nucleotide exchange factor 1 (115 kDa guanine nucleotide exchange factor) (p115-RhoGEF) (p115RhoGEF) (Sub1.5)	ARHGEF1	8	23.8734	23.8642	24.5117	25.7499	24.5455	23.684	24.3729	24.9306	25.3769	24.0202	24.3903	24.3525	25.1505	23.8857	24.4984	23.4465	26.3957	25.5247	25.906	25.8339	25.4374	25.7127	25.5691	23.6116	24.542	25.6676	24.7667	25.223	24.0372	25.8716	23.2604	23.3352	22.8709	26.0083	24.6001	25.0958	24.6555	25.7308	24.151	23.8382	24.3294	25.1913	23.6393	23.7405	27.6634
Q12774	ARHG5_HUMAN	Rho guanine nucleotide exchange factor 5 (Ephexin-3) (Guanine nucleotide regulatory protein TIM) (Oncogene TIM) (Transforming immortalized mammary oncogene) (p60 TIM)	ARHGEF5 TIM	2	20.8903	22.5699	20.5228	20.1356	20.6895	21.1292	20.943	21.0129	21.2676	21.3651	20.435	20.6876	21.2713	20.5373	20.3539	20.9634	20.4505	20.6119	20.5217	20.0009	21.4273	20.6894	20.6232	20.4591	21.1868	21.3414	20.5451	21.2755	20.0959	20.2594	21.1582	20.749	21.01	19.9579	20.3918	21.5407	21.4126	19.4454	21.1172	20.7896	19.9862	21.077	21.3291	19.8915	22.6855
Q15052	ARHG6_HUMAN	Rho guanine nucleotide exchange factor 6 (Alpha-Pix) (COOL-2) (PAK-interacting exchange factor alpha) (Rac/Cdc42 guanine nucleotide exchange factor 6)	ARHGEF6 COOL2 KIAA0006 PIXA	5	25.2755	25.1589	24.8225	25.1723	25.9305	25.0016	25.3646	25.7056	25.9477	24.8068	25.1833	25.2027	25.3952	25.9643	25.3587	25.1513	25.9342	24.9566	25.934	25.568	25.9278	25.9739	25.8421	25.1372	25.6962	26.3826	26.3164	25.7374	25.0616	26.2707	25.4645	24.9153	24.8736	25.1113	24.5788	25.1539	24.8422	24.9181	24.7141	24.9857	25.3641	25.9202	24.9573	25.3403	26.6973
Q14155	ARHG7_HUMAN	Rho guanine nucleotide exchange factor 7 (Beta-Pix) (COOL-1) (PAK-interacting exchange factor beta) (p85)	ARHGEF7 COOL1 KIAA0142 P85SPR PAK3BP PIXB Nbla10314	17	26.913	26.8318	26.5118	26.9502	27.5203	26.7551	27.0884	27.4081	27.9661	26.4684	26.6948	26.7972	26.5741	26.9659	26.5233	26.2592	27.6116	25.8527	27.4571	27.17	27.4689	27.6077	27.1518	26.0361	26.9823	28.0464	27.8734	27.0215	25.7809	27.7355	26.6221	26.6612	26.6787	26.2403	26.4641	26.8504	27.1001	26.2915	26.5175	26.9922	26.9792	27.8191	26.4958	25.9549	28.4771
O15013	ARHGA_HUMAN	Rho guanine nucleotide exchange factor 10	ARHGEF10 KIAA0294	9	23.1262	21.8861	22.5224	23.5603	23.0327	22.3801	23.3596	24.398	24.6521	22.5862	22.733	22.9429	23.0753	23.201	23.3795	22.3396	24.9158	22.3514	24.5286	24.3614	24.6628	24.7822	24.7066	22.6129	23.8118	24.5395	24.8853	23.3743	22.4244	24.2114	22.207	21.9927	22.1425	22.4709	23.6297	24.2051	23.4334	22.0206	22.2274	23.1823	22.5988	24.2996	22.6732	22.9102	24.1176
O15085	ARHGB_HUMAN	Rho guanine nucleotide exchange factor 11 (PDZ-RhoGEF)	ARHGEF11 KIAA0380	4	24.2909	23.8953	23.2773	23.7319	24.291	22.9306	23.408	23.6368	24.0861	24.1525	23.8438	23.4563	24.1306	23.9224	24.2289	23.0558	23.9589	23.1754	24.4731	23.4641	23.5893	24.2469	23.2568	23.1243	23.2472	24.0712	24.1604	24.0619	22.9146	24.5163	24.395	23.7534	23.073	23.5846	23.2385	23.4897	23.2024	23.3496	23.4784	23.8329	23.6215	24.2836	23.1152	24.1915	24.8516
Q9NZN5	ARHGC_HUMAN	Rho guanine nucleotide exchange factor 12 (Leukemia-associated RhoGEF)	ARHGEF12 KIAA0382 LARG	24	27.0481	27.0746	27.1692	27.7426	27.8328	27.4062	27.5672	27.9836	28.6155	27.3655	27.5249	27.5267	27.2722	27.3881	27.4998	27.3101	27.8777	26.7962	28.1518	27.8771	27.8977	28.1384	27.8083	27.4391	27.7181	28.2704	28.03	28.0381	26.9677	27.9585	27.4113	27.4394	27.0853	26.5587	27.5263	27.6007	27.3085	27.1837	27.0536	27.4416	27.4103	27.9117	27.2975	27.5147	29.3711
Q9Y4X5	ARI1_HUMAN	E3 ubiquitin-protein ligase ARIH1 (EC 2.3.2.31) (H7-AP2) (HHARI) (Monocyte protein 6) (MOP-6) (Protein ariadne-1 homolog) (ARI-1) (UbcH7-binding protein) (UbcM4-interacting protein) (Ubiquitin-conjugating enzyme E2-binding protein 1)	ARIH1 ARI MOP6 UBCH7BP HUSSY-27	3	22.2354	23.849	22.6287	22.8211	22.609	22.899	22.7255	22.1848	21.7052	22.5818	22.1607	22.8914	21.7441	22.4996	22.9423	21.8377	23.3717	22.5886	23.8025	22.2962	22.9353	22.4605	21.5985	22.517	22.3264	23.12	22.4421	22.777	21.0124	21.1341	22.6012	22.9087	23.124	24.241	21.2643	23.4394	23.7238	21.2286	23.3742	23.2059	22.5159	23.7936	22.7713	20.786	20.8683
O95376	ARI2_HUMAN	E3 ubiquitin-protein ligase ARIH2 (ARI-2) (Protein ariadne-2 homolog) (EC 2.3.2.31) (RING-type E3 ubiquitin transferase ARIH2) (Triad1 protein)	ARIH2 ARI2 TRIAD1 HT005	2	18.1854	21.2096	20.4063	21.4672	21.6694	20.2233	22.0135	21.5701	22.5863	20.5991	21.1596	20.8599	20.6472	21.7484	20.0123	20.4563	21.5201	20.0519	21.7265	21.3718	21.3198	20.9765	21.7284	21.3599	21.8692	21.5938	21.4709	21.0575	21.8049	21.5229	19.8395	20.5498	19.6929	21.7418	21.4822	21.4758	21.7635	21.5817	20.5004	21.3386	21.2537	22.0333	19.9055	21.386	25.5234
O43488	ARK72_HUMAN	Aflatoxin B1 aldehyde reductase member 2 (EC 1.1.1.n11) (AFB1 aldehyde reductase 1) (AFB1-AR 1) (Aldoketoreductase 7) (Succinic semialdehyde reductase) (SSA reductase)	AKR7A2 AFAR AFAR1 AKR7	9	28.8932	29.5692	29.4524	27.5255	28.4457	29.3923	29.4459	28.2359	27.9462	29.5055	28.9036	29.0353	28.1724	28.0114	28.776	28.9236	27.7873	29.2002	27.5852	27.9149	28.3544	28.0107	28.1601	28.734	28.4008	28.239	27.5374	28.6251	28.4417	27.3364	28.8311	29.2015	29.9208	27.7466	29.0798	28.7966	29.1301	28.572	29.716	29.3106	28.1447	28.5485	29.0989	27.6468	28.7991
O95154	ARK73_HUMAN	Aflatoxin B1 aldehyde reductase member 3 (EC 1.-.-.-) (AFB1 aldehyde reductase 2) (AFB1-AR 2)	AKR7A3 AFAR2	5	25.5496	27.9819	26.5508	25.8567	25.8366	26.5083	26.5624	25.6933	26.4067	26.6959	26.0224	26.1372	25.8958	25.3832	25.9964	26.2368	25.248	26.2039	25.4876	25.6557	26.0234	25.9048	25.7322	26.3046	26.3603	26.1531	25.6794	26.0171	26.3522	26.0317	25.4675	26.3084	26.8998	25.6418	26.4592	25.9289	26.2646	26.0307	26.3457	26.2847	26.4982	25.6856	26.3722	25.5876	28.5221
Q8NHP1	ARK74_HUMAN	Aflatoxin B1 aldehyde reductase member 4 (EC 1.-.-.-) (AFB1 aldehyde reductase 3) (AFB1-AR 3) (Aldoketoreductase 7-like)	AKR7L AFAR3 AKR7A4	3	26.4526	26.9848	27.1848	25.7373	26.1151	27.096	27.2314	26.6253	26.4966	27.3378	26.3976	26.7612	26.1096	25.8395	26.5932	26.757	25.6693	26.9679	25.7016	25.9194	26.2411	26.2427	26.0753	26.4417	26.3881	26.4119	25.774	26.5408	26.5737	26.1572	26.2465	27.1571	27.613	26.0165	26.9269	26.2437	26.8484	26.4095	27.512	27.0671	26.0422	27.0662	27.0504	25.5087	26.9476
P40616	ARL1_HUMAN	ADP-ribosylation factor-like protein 1	ARL1	9	26.8631	27.5295	27.4872	27.6265	28.2962	27.5538	27.4896	28.7652	28.9215	26.9146	27.7662	27.107	26.7782	26.9304	27.3098	27.9784	28.2985	26.907	28.1559	28.2464	28.3087	28.6008	28.4625	27.535	27.8564	28.3049	28.4853	26.7331	28.0317	28.5835	26.9804	26.708	28.1622	28.4043	28.2572	28.2397	27.5319	27.2348	26.8664	27.7027	27.3198	28.0822	27.8557	28.4227	27.1978
Q9NXU5	ARL15_HUMAN	ADP-ribosylation factor-like protein 15 (ADP-ribosylation factor-related protein 2) (ARF-related protein 2)	ARL15 ARFRP2	6	27.0354	26.5123	26.0783	26.4769	25.5379	26.5297	26.5414	26.1691	27.3928	26.2075	26.0539	26.5691	27.4114	27.5229	26.5832	26.6086	26.2398	26.716	25.7045	26.3952	26.192	26.5532	26.4079	26.7601	26.2007	26.0119	26.5152	27.426	27.0189	26.5562	27.0272	27.0821	25.984	26.699	26.2745	26.266	26.398	27.0223	26.0679	26.4769	26.7416	26.5912	26.5049	26.4828	29.944
P36404	ARL2_HUMAN	ADP-ribosylation factor-like protein 2	ARL2	6	24.5935	24.6434	24.6271	24.7056	24.2497	24.6585	24.4756	25.0717	24.624	24.6068	24.078	24.4862	24.4917	25.3637	24.0933	24.3233	25.4544	23.9721	25.4668	25.0849	24.8898	25.5835	24.9164	24.4668	24.4666	25.1852	26.0745	24.6638	24.3914	25.4202	24.3446	24.1654	25.2047	25.5126	25.0786	25.0441	24.6663	24.6278	24.9995	24.8075	23.8014	24.912	24.1025	24.809	25.3296
P36405	ARL3_HUMAN	ADP-ribosylation factor-like protein 3	ARL3 ARFL3	7	26.2548	26.8751	26.4857	26.09	26.1626	26.8629	26.3194	27.5677	26.6343	26.2477	26.4141	27.1013	26.6003	26.7653	26.9655	26.6848	27.9674	26.7792	28.0192	27.5567	27.5274	28.3431	27.6621	26.8879	27.0295	27.7091	28.29	27.0689	26.0864	27.0002	27.0992	27.245	27.1622	27.0825	26.7381	27.8769	26.8562	25.9572	26.9073	27.0524	25.65	26.82	26.8844	26.5495	26.259
Q9H0F7	ARL6_HUMAN	ADP-ribosylation factor-like protein 6 (Bardet-Biedl syndrome 3 protein)	ARL6 BBS3	5	22.7877	22.2724	22.5276	23.6496	22.6531	22.9119	21.8023	25.2172	23.7702	22.7836	22.3176	22.498	22.5133	22.547	22.5433	22.6438	24.9527	22.3053	25.1237	23.925	24.1084	24.3682	24.1726	22.3477	23.4347	24.6366	24.9289	22.1658	23.4013	23.7549	23.0798	22.4973	22.6726	25.4257	25.2019	24.9549	23.7497	23.0908	23.1969	22.9296	21.7646	24.3736	23.112	24.6463	19.6401
Q96BM9	ARL8A_HUMAN	ADP-ribosylation factor-like protein 8A (ADP-ribosylation factor-like protein 10B) (Novel small G protein indispensable for equal chromosome segregation 2)	ARL8A ARL10B GIE2	12	30.4199	31.2557	31.0673	30.5307	30.3214	30.8905	31.3492	31.5749	31.2523	30.9748	30.2941	30.8574	30.2545	30.2654	31.0985	31.2505	30.9331	30.7475	30.4219	30.0602	30.9737	30.6611	30.412	30.982	31.045	31.0035	30.5927	30.4168	30.564	30.6062	30.9301	30.9764	31.5605	29.9421	30.6817	30.6749	31.2446	30.2517	30.9444	30.9731	30.8859	30.598	30.8543	30.4322	31.4681
Q9NVJ2	ARL8B_HUMAN	ADP-ribosylation factor-like protein 8B (ADP-ribosylation factor-like protein 10C) (Novel small G protein indispensable for equal chromosome segregation 1)	ARL8B ARL10C GIE1	11	30.0401	31.1727	30.8155	30.171	30.0886	30.7047	31.2799	31.4488	30.9025	30.8306	30.0054	30.547	29.6961	29.9452	30.8655	30.8644	30.7117	30.513	30.1157	29.9937	30.7228	30.4904	30.3453	30.8383	30.8951	30.779	30.358	29.7941	30.2874	30.3606	30.474	30.8007	31.5727	29.7261	30.552	30.6294	31.2629	29.9861	30.6642	30.7064	30.6817	30.4636	30.6587	30.0688	31.3867
P04424	ARLY_HUMAN	Argininosuccinate lyase (ASAL) (EC 4.3.2.1) (Arginosuccinase)	ASL	6	25.1639	24.622	24.6838	23.9805	23.2152	25.3007	24.2192	23.6092	24.4642	24.4758	24.1077	24.9624	24.165	24.1996	24.8025	24.207	23.5079	23.7236	22.7751	23.4646	23.6808	23.2369	23.7278	24.1173	24.3142	24.1918	24.0422	25.1269	23.4125	22.9209	24.8815	24.6678	24.4399	23.575	23.8444	24.5543	24.9897	23.3921	25.6461	25.4519	23.7571	24.257	25.2677	23.8345	26.0569
Q8N2F6	ARM10_HUMAN	Armadillo repeat-containing protein 10 (Splicing variant involved in hepatocarcinogenesis protein)	ARMC10 SVH PSEC0198	11	27.3781	28.7028	28.6926	27.6587	27.812	28.4707	28.9596	28.1148	28.7881	28.9112	28.1563	28.1364	28.2794	28.2025	28.102	28.6199	27.8756	28.117	27.9747	27.4829	28.1817	27.8586	27.8876	28.5191	28.0912	28.3427	27.4191	27.3749	28.6027	28.1047	28.1	28.2261	29.4261	27.65	28.8456	27.5658	28.78	28.1745	28.2408	28.2574	28.1408	28.5382	28.3801	28.3574	28.3574
Q9NVT9	ARMC1_HUMAN	Armadillo repeat-containing protein 1	ARMC1 ARCP	2	22.6546	24.559	24.8254	23.3895	22.7027	24.3764	24.2322	23.5013	22.1351	25.2792	24.5622	24.6986	23.8665	23.5155	24.6778	25.1399	23.3531	24.9007	23.6155	22.9735	23.827	22.7439	23.2936	24.5994	23.5903	23.4455	22.2008	23.5922	24.4304	23.5297	24.2734	23.8869	24.9643	22.3624	25.1886	22.599	23.7349	23.7476	24.1983	23.1528	23.3742	23.2606	23.3574	24.2966	23.7972
Q6NXE6	ARMC6_HUMAN	Armadillo repeat-containing protein 6	ARMC6	3	19.0112	19.783	18.6445	21.7897	21.5305	18.3512	21.9048	22.5	22.549	19.8594	20.5782	20.4144	19.2908	20.053	21.2616	19.9371	22.1696	20.5755	21.4841	22.0101	22.2346	21.4277	22.1311	19.4984	21.6434	21.8203	21.5809	21.3466	19.6012	21.7867	19.7938	18.5102	19.0508	21.0156	21.0182	20.8925	20.9599	19.8755	19.939	21.3036	20.8777	22.4357	20.4201	20.6393	21.5721
Q8IUR7	ARMC8_HUMAN	Armadillo repeat-containing protein 8	ARMC8 S863-2	2	20.9966	19.8862	19.8725	21.8543	21.5431	20.2335	20.0212	21.9763	22.6676	20.086	21.0299	19.6339	20.9424	21.32	19.2279	19.6746	22.0203	17.7439	22.0494	21.2868	21.8616	22.1179	20.6548	18.6193	20.8463	22.3691	22.6528	19.6182	18.6921	21.8227	18.1999	18.7324	19.5684	22.0843	20.1342	22.1577	20.6713	19.8459	21.3195	21.4286	21.0874	22.4334	20.4317	17.1866	19.8104
Q7Z3E5	ARMC9_HUMAN	LisH domain-containing protein ARMC9 (Armadillo repeat-containing protein 9) (Melanoma/melanocyte-specific tumor antigen KU-MEL-1) (NS21)	ARMC9 KIAA1868	5	21.9287	22.8377	22.058	23.3811	23.2953	22.5497	22.1325	24.1511	24.4249	22.2334	22.0095	22.007	22.6732	21.5745	22.2435	21.8002	24.1636	21.7755	23.9601	24.1654	23.3238	23.4371	23.5824	21.4228	22.9188	24.0019	24.7414	22.4586	21.8407	23.6964	21.6912	22.2489	22.6637	24.5505	23.4952	23.594	22.1021	22.3049	22.1313	23.2176	22.6776	24.3174	22.6553	21.8643	24.2221
Q9H993	ARMT1_HUMAN	Damage-control phosphatase ARMT1 (EC 3.1.3.-) (Acidic residue methyltransferase 1) (Protein-glutamate O-methyltransferase) (EC 2.1.1.-) (Sugar phosphate phosphatase ARMT1)	ARMT1 C6orf211	2	20.6393	22.0933	21.5218	20.0013	21.0438	20.8447	20.9074	21.8108	19.7151	22.2005	23.0991	21.5695	20.5241	20.9446	21.4366	20.8342	20.3128	19.9942	19.7279	19.9867	20.3311	20.3221	19.8339	21.1111	20.9096	20.9592	21.0255	20.7009	19.8454	19.5707	20.8953	21.9097	21.6585	20.8072	21.0687	22.7043	22.3599	20.1723	23.1226	22.803	20.5844	22.8379	22.2565	18.8519	22.8492
Q9P291	ARMX1_HUMAN	Armadillo repeat-containing X-linked protein 1 (ARM protein lost in epithelial cancers on chromosome X 1) (Protein ALEX1)	ARMCX1 ALEX1 AD032	5	22.4519	24.2248	24.7527	24.0064	23.5276	23.8877	23.8636	22.4238	23.9742	23.9267	23.3337	23.6201	23.8244	24.1518	23.801	23.6582	23.7614	23.9289	23.2905	23.2682	23.735	22.4028	23.1155	24.5608	25.2156	23.0843	21.5883	24.0308	23.7297	22.896	23.2889	23.4746	24.9312	22.2426	23.4458	21.6761	23.9075	23.7737	22.7487	23.9863	22.8982	23.8326	23.1159	24.6804	24.2519
Q7L311	ARMX2_HUMAN	Armadillo repeat-containing X-linked protein 2 (ARM protein lost in epithelial cancers on chromosome X 2) (Protein ALEX2)	ARMCX2 ALEX2 KIAA0512	3	21.3989	23.9888	24.2767	22.8804	23.516	23.0168	23.3067	21.2788	23.4844	23.9722	23.6062	22.807	22.9993	22.5457	22.7826	22.9429	22.7626	23.2349	22.731	21.6776	23.0728	21.0353	22.3485	23.9033	22.707	22.0944	18.8926	22.6116	22.8724	22.4734	22.2864	22.3635	24.6955	20.7319	22.2035	20.2148	23.6024	22.4601	22.5537	23.1296	21.886	22.7908	22.7947	23.6263	22.3957
Q9UH62	ARMX3_HUMAN	Armadillo repeat-containing X-linked protein 3 (ARM protein lost in epithelial cancers on chromosome X 3) (Protein ALEX3)	ARMCX3 ALEX3 BM-017 UNQ2517/PRO6007	5	23.0251	24.3016	23.1978	22.748	22.8141	23.9097	24.0251	22.7729	23.1095	23.2052	22.8519	23.3717	23.4462	23.0236	23.3662	23.8244	23.0997	24.0077	22.7031	23.0579	23.0286	23.3617	22.9282	23.53	24.4713	22.8748	22.7224	23.8286	23.7139	24.0996	24.7648	23.0882	23.6911	23.2732	24.1285	23.3546	24.3323	23.04	23.2952	25.5398	24.2214	22.8507	24.1001	23.2921	28.8839
Q9NZ32	ARP10_HUMAN	Actin-related protein 10 (Actin-related protein 11) (hARP11)	ACTR10 ACTR11 ARP11	3	23.9493	24.4966	24.012	23.5992	22.839	23.8888	24.1547	22.5575	22.7156	24.4383	23.493	23.7428	23.9169	24.2121	24.2121	23.4508	23.047	23.4747	23.2804	22.8954	23.6519	22.548	22.9663	23.7627	23.3435	23.8005	23.3582	24.9681	22.4726	22.8948	23.9663	24.5753	24.944	23.7672	23.2025	23.6773	24.6258	23.4585	25.0115	24.6265	23.7472	23.2724	24.4694	22.381	24.8597
P61160	ARP2_HUMAN	Actin-related protein 2 (Actin-like protein 2)	ACTR2 ARP2	14	28.9266	29.6483	28.9311	28.6271	28.3087	29.553	29.53	28.6635	28.8966	29.2279	28.4405	28.9121	28.7257	28.5926	28.9018	28.5748	28.04	28.941	28.1578	28.5226	28.3149	28.6498	28.3647	28.5831	28.4558	28.499	28.4666	29.4788	27.9777	28.3225	28.9097	29.0631	29.5163	29.164	29.1185	28.9795	29.5307	28.9114	29.4111	29.5725	28.9413	28.2301	29.2495	28.4741	29.7098
P61158	ARP3_HUMAN	Actin-related protein 3 (Actin-like protein 3)	ACTR3 ARP3	18	29.1375	29.8974	29.4235	28.6392	28.7907	29.6419	29.5677	28.627	29.0539	29.6783	29.1462	28.908	28.5147	28.7551	28.9728	28.6851	27.9936	28.9709	28.2482	28.5552	28.2955	28.2042	28.3389	28.7437	28.631	28.6747	28.1778	29.1924	28.1869	28.4524	28.8829	29.2046	29.9888	29.2222	29.2983	28.7674	29.85	29.2393	29.8079	29.5883	28.9672	28.664	29.3999	28.3177	29.318
Q9P1U1	ARP3B_HUMAN	Actin-related protein 3B (ARP3-beta) (Actin-like protein 3B) (Actin-related protein ARP4)	ACTR3B ARP11 ARP4	4	24.0175	24.7072	24.701	23.9568	24.3163	24.8981	24.5217	23.4397	24.1992	24.764	24.2549	24.0588	24.1856	24.2862	24.1028	23.6841	23.2966	23.9323	23.1167	23.4254	23.5765	23.1341	23.4554	23.8499	24.1821	24.0829	23.4644	24.5063	23.6422	24.2402	24.2519	24.3577	25.4134	23.7995	24.4738	23.7715	25.1137	24.9441	24.0568	24.7029	24.3102	23.7219	24.1455	24.0083	26.009
Q9BPX5	ARP5L_HUMAN	Actin-related protein 2/3 complex subunit 5-like protein (Arp2/3 complex 16 kDa subunit 2) (ARC16-2)	ARPC5L	3	27.0687	27.6279	27.3173	26.6705	26.4065	27.3523	27.5349	26.43	27.5348	27.7597	26.9964	26.832	26.9603	26.5111	26.8059	26.6946	26.0797	26.8508	26.071	26.6092	25.9986	26.4398	26.076	26.8504	26.4783	26.6114	26.2135	27.1392	26.672	26.3851	27.0333	27.0467	27.5616	26.5374	27.5919	26.9436	27.5345	27.9346	27.2611	27.4798	26.8446	27.0258	27.244	26.7416	27.594
O15144	ARPC2_HUMAN	Actin-related protein 2/3 complex subunit 2 (Arp2/3 complex 34 kDa subunit) (p34-ARC)	ARPC2 ARC34 PRO2446	13	27.5717	28.3536	27.4992	27.2224	26.9022	27.9171	27.8052	26.7737	29.0025	27.8573	27.1307	27.2604	27.2964	27.2851	27.5124	27.1932	26.4853	27.376	26.78	27.1404	26.9924	27.0012	27.1006	27.1379	27.3658	27.1824	26.8939	27.9446	26.9872	27.3435	27.5507	27.3474	28.0892	28.5509	27.5277	27.3188	28.2263	27.8393	28.1203	27.8179	27.4545	26.9415	27.6608	27.5796	29.1299
O15145	ARPC3_HUMAN	Actin-related protein 2/3 complex subunit 3 (Arp2/3 complex 21 kDa subunit) (p21-ARC)	ARPC3 ARC21	5	26.2529	26.4028	26.0746	25.5342	25.3226	26.4206	26.1887	25.1131	26.2057	26.2886	25.7101	25.8472	25.7489	25.9551	25.9026	25.4674	24.8814	25.8695	24.9022	25.2096	24.8205	25.1578	25.0638	25.5721	25.5547	25.3308	25.0849	26.0481	25.1164	25.8603	25.9089	25.9379	26.3491	26.3029	25.9555	25.6242	26.5823	26.2253	26.3094	26.3068	25.7634	25.5373	25.9352	25.2975	27.8004
P59998	ARPC4_HUMAN	Actin-related protein 2/3 complex subunit 4 (Arp2/3 complex 20 kDa subunit) (p20-ARC)	ARPC4 ARC20	7	27.3073	27.8017	27.1568	26.5357	26.0222	27.165	27.3881	26.2211	27.1269	27.4241	26.7208	26.8448	26.7514	26.903	26.8769	26.521	25.7395	26.8733	25.7989	26.3995	26.0042	26.2595	26.2341	26.6836	26.5754	26.5518	26.2162	27.2009	26.0793	26.5967	27.0162	27.0484	27.3623	27.0123	27.1108	26.6047	27.5769	26.9408	27.957	27.4877	26.8191	26.3111	27.2012	26.816	28.1574
O15511	ARPC5_HUMAN	Actin-related protein 2/3 complex subunit 5 (Arp2/3 complex 16 kDa subunit) (p16-ARC)	ARPC5 ARC16	6	26.5323	26.8099	26.4153	25.8665	25.4102	26.5761	26.7546	25.0735	25.7921	26.4942	25.9728	26.578	26.1833	26.3245	26.6809	25.9812	25.3143	26.3243	25.7342	25.9309	25.6333	25.7088	25.5941	25.9273	26.033	26.1113	25.5321	26.9678	24.9419	25.8517	26.5651	26.596	26.537	26.7949	25.9495	25.5133	26.6262	26.3553	27.3822	26.7397	26.0672	25.2114	26.3478	25.761	26.8684
P49407	ARRB1_HUMAN	Beta-arrestin-1 (Arrestin beta-1) (Non-visual arrestin-2)	ARRB1 ARR1	2	23.3741	21.022	20.4044	24.018	20.1105	21.307	21.0972	23.344	22.0845	20.4001	21.5662	19.6994	22.5953	21.1142	20.6769	18.5916	22.0947	19.6442	25.2717	22.053	20.4511	19.5824	20.0922	20.6859	20.7474	23.3699	22.9298	20.1742	22.8755	20.9144	22.5688	20.8858	21.0478	27.0147	25.3958	22.2306	23.4162	23.8646	20.5717	21.0627	20.3788	21.9011	21.587	23.1813	21.1772
P36575	ARRC_HUMAN	Arrestin-C (Cone arrestin) (C-arrestin) (cArr) (Retinal cone arrestin-3) (X-arrestin)	ARR3 ARRX CAR	15	26.5795	27.0978	26.3852	27.9812	26.3824	27.0863	26.6632	27.9882	27.0949	26.8019	26.8112	26.3533	28.0791	27.6353	26.519	26.1497	26.8645	25.8895	27.416	27.3337	26.4165	26.1827	26.0973	26.0799	26.4922	29.046	27.4474	27.6722	26.5125	26.5376	27.6034	26.7922	26.9746	28.631	29.0387	27.3268	28.2347	28.434	26.8104	27.3538	26.3525	27.3198	27.1185	28.542	27.5174
P10523	ARRS_HUMAN	S-arrestin (48 kDa protein) (Retinal S-antigen) (S-AG) (Rod photoreceptor arrestin)	SAG	26	31.1287	28.3546	28.452	31.5451	27.8635	29.8388	28.4322	31.5184	29.7657	28.9796	29.4971	27.7579	30.4519	29.7242	27.8019	28.446	29.9184	27.8427	33.5903	30.0723	27.4627	28.859	28.108	28.6543	28.2063	30.7535	30.8875	28.4077	30.7563	29.247	30.4218	29.3147	28.9639	35.1088	32.9431	29.562	31.7985	30.8852	29.0763	28.5782	27.0566	29.0188	29.3173	30.482	29.9842
P15289	ARSA_HUMAN	Arylsulfatase A (ASA) (EC 3.1.6.8) (Cerebroside-sulfatase) [Cleaved into: Arylsulfatase A component B; Arylsulfatase A component C]	ARSA	5	25.1034	25.6444	25.6401	25.4588	25.3576	25.7144	24.9494	25.4682	26.6393	24.5729	25.247	25.3099	26.2771	25.4111	25.1266	25.4569	25.0761	25.2613	24.3679	25.4035	25.4325	26.3612	25.3145	25.9014	25.476	25.0243	24.6523	25.7806	25.9071	25.6424	26.2628	26.9518	26.0054	23.9707	24.1562	24.4729	25.5009	25.4639	25.0397	24.8667	24.2987	24.5328	25.3393	25.6014	26.0711
P15848	ARSB_HUMAN	Arylsulfatase B (ASB) (EC 3.1.6.12) (N-acetylgalactosamine-4-sulfatase) (G4S)	ARSB	7	26.4307	27.0625	26.7828	25.9119	26.0788	26.2941	27.0419	26.8025	26.9436	26.6771	26.6344	26.3201	25.7574	25.5985	26.3342	26.1003	24.9254	26.1724	25.4785	25.6965	26.1725	25.6416	25.456	26.5992	26.0174	26.0071	25.4748	26.2741	25.8671	25.3433	26.5881	27.0021	27.959	24.6767	26.4749	25.8999	26.9559	26.2366	26.79	26.6355	25.746	26.0952	25.9204	25.7145	25.3532
P51689	ARSD_HUMAN	Arylsulfatase D (ASD) (EC 3.1.6.-)	ARSD	14	27.6196	27.4418	28.2921	27.8738	27.4388	28.3233	28.4191	28.1216	29.1225	28.4988	27.9473	28.2014	28.1021	28.1312	28.6819	28.1255	27.8062	28.0717	27.471	27.9166	28.3913	28.2253	28.9915	28.5782	28.1806	28.5196	27.9315	27.9612	28.2042	27.6407	28.3231	28.376	29.3409	28.1742	29.0394	28.6611	28.5826	28.1925	28.0284	28.0001	27.654	28.3929	28.2964	29.2897	29.6402
Q5FYA8	ARSH_HUMAN	Arylsulfatase H (ASH) (EC 3.1.6.-)	ARSH	2	22.615	22.9659	23.636	23.1508	22.3726	23.4247	23.7205	23.443	24.6369	23.4337	22.7112	23.6615	23.7895	23.3645	23.9493	23.6778	23.3106	23.4728	22.7574	23.4702	23.6499	23.5934	24.4892	24.1168	23.2014	23.7924	23.3881	23.5024	23.7681	23.0426	23.6153	23.5936	24.6196	23.3797	24.3378	23.8306	23.9553	23.336	23.0926	23.1048	22.71	23.3265	23.1673	24.96	23.3104
Q6UWY0	ARSK_HUMAN	Arylsulfatase K (ASK) (EC 3.1.6.-) (Telethon sulfatase)	ARSK TSULF UNQ630/PRO1246	2	20.672	21.2737	21.1194	20.5751	23.2413	21.4158	21.7465	21.6143	22.7059	20.7605	20.1639	21.0005	20.9291	21.0374	21.7949	21.8988	21.647	21.5557	20.3294	21.4277	20.7874	21.7034	22.0776	20.797	20.6139	21.327	21.7099	21.3511	21.1654	20.8562	21.3123	21.4428	21.9438	20.3029	21.0998	20.8479	21.0589	20.6107	20.8652	21.7081	21.2317	21.1132	21.0418	21.454	20.2074
P51690	ARSL_HUMAN	Arylsulfatase L (EC 3.1.6.-) (Arylsulfatase E) (ASE)	ARSL ARSE	5	23.6131	24.7784	23.6615	24.721	23.8303	22.1672	22.8957	24.7806	25.339	23.8905	23.5495	24.3193	24.9858	24.9964	24.2815	25.0418	24.8242	25.2915	23.0736	24.4492	22.6228	25.4649	24.0779	23.7494	23.3477	24.5772	24.1291	25.1062	25.3675	24.1571	24.6376	23.8793	22.7009	24.5589	24.0407	24.701	23.687	25.302	23.5028	22.4431	22.8465	23.5772	22.4863	25.77	24.6194
Q9H2C2	ARV1_HUMAN	Protein ARV1 (hARV1)	ARV1 HT035	2	23.6684	23.76	23.6826	24.1009	24.3531	24.1196	24.5642	25.1594	25.8371	23.9768	23.8521	23.7335	23.8549	23.7613	24.1061	24.743	23.6021	24.0105	23.8908	23.9629	24.4162	23.9399	24.3917	24.3628	24.4414	24.1756	24.7788	24.4385	23.8865	24.395	23.6856	24.1647	25.112	24.0077	24.6314	24.1154	24.7182	24.4418	23.3697	23.8894	24.3416	24.9559	24.6222	23.956	26.9326
O00192	ARVC_HUMAN	Armadillo repeat protein deleted in velo-cardio-facial syndrome	ARVCF	10	27.0189	27.9973	23.3397	23.0421	24.2344	24.7698	23.9389	23.5223	24.2866	25.0074	24.0968	23.3577	23.6821	24.0572	23.253	22.8188	24.4152	23.9147	24.5478	23.9112	23.7493	22.5592	24.4132	23.5287	23.3905	23.7738	23.1678	21.9708	22.8891	23.1847	23.0435	23.7401	24.1983	23.8023	24.5229	25.8854	24.1011	24.7334	25.8704	23.3091	24.142	23.4877	24.2097	23.3549	26.8833
P18440	ARY1_HUMAN	Arylamine N-acetyltransferase 1 (EC 2.3.1.5) (Arylamide acetylase 1) (Monomorphic arylamine N-acetyltransferase) (MNAT) (N-acetyltransferase type 1) (NAT-1)	NAT1 AAC1	2	19.28	21.2294	20.4849	20.8428	21.4738	20.1927	21.7046	22.4067	20.963	20.8938	20.4945	20.8902	17.3584	19.3465	20.7255	20.672	21.8951	20.9393	21.7624	21.3909	22.3935	21.2216	22.2821	21.2936	20.9903	21.1467	21.1628	19.9067	20.8526	20.4153	19.9019	20.6859	21.663	22.3035	20.9185	21.442	21.4871	19.4249	20.8551	20.5536	20.914	22.0121	20.2825	20.1749	18.2743
Q13510	ASAH1_HUMAN	Acid ceramidase (AC) (ACDase) (Acid CDase) (EC 3.5.1.23) (Acylsphingosine deacylase) (N-acylethanolamine hydrolase ASAH1) (EC 3.5.1.-) (N-acylsphingosine amidohydrolase) (Putative 32 kDa heart protein) (PHP32) [Cleaved into: Acid ceramidase subunit alpha; Acid ceramidase subunit beta]	ASAH1 ASAH HSD-33 HSD33	25	31.7653	33.819	33.0474	32.6922	32.6177	32.4817	32.5774	33.3928	33.5623	32.1654	32.0475	32.7151	32.8487	32.4877	32.1279	33.1383	32.3367	32.9283	32.3215	33.1207	32.308	32.9467	32.8547	33.0954	32.7459	32.0541	32.8457	33.2702	33.1897	33.5141	33.1086	33.3399	33.7917	33.0443	32.8913	32.2614	33.703	33.0135	32.7393	32.5344	32.3735	32.9715	32.4485	32.756	33.992
Q8WXK3	ASB13_HUMAN	Ankyrin repeat and SOCS box protein 13 (ASB-13)	ASB13	5	23.1694	24.0848	23.9135	25.0224	24.5339	23.8051	24.5063	24.4027	25.4007	23.8793	24.0607	24.2247	23.9409	24.4896	24.0709	23.6827	24.459	23.7402	24.3195	24.9162	24.2611	23.67	24.8536	24.5994	24.8727	24.263	24.6632	24.6795	24.6746	25.0092	24.1061	23.9656	24.4602	23.9782	24.1524	24.219	23.8197	24.5203	22.7999	24.4391	24.0194	25.0265	24.0351	24.5275	27.939
Q9H1I8	ASCC2_HUMAN	Activating signal cointegrator 1 complex subunit 2 (ASC-1 complex subunit p100) (Trip4 complex subunit p100)	ASCC2 ASC1P100	3	20.9672	20.4892	20.9105	21.5884	22.7121	20.212	20.7405	23.0382	22.2132	21.3077	20.5195	20.3618	19.6536	20.9335	21.4658	21.4842	22.6335	20.8625	22.4532	22.1022	22.8533	22.407	22.55	21.3408	21.1394	23.1609	22.7455	20.5652	20.2059	22.5236	20.2158	20.7657	20.0074	22.3211	18.8057	21.9281	21.9208	21.1434	20.9779	20.9101	20.7795	22.6971	20.2721	20.267	21.2815
Q8N3C0	ASCC3_HUMAN	Activating signal cointegrator 1 complex subunit 3 (EC 3.6.4.12) (ASC-1 complex subunit p200) (ASC1p200) (Helicase, ATP binding 1) (Trip4 complex subunit p200)	ASCC3 HELIC1	8	22.1249	20.5714	21.3561	23.3022	23.4388	22.035	22.1175	24.1309	23.9174	21.3442	21.7994	21.7853	22.273	22.2079	22.5674	21.9216	23.8708	21.5866	23.9487	23.6464	24.0341	23.9151	23.8802	22.4668	22.9784	23.9946	24.2628	22.8569	21.5821	24.0924	21.9074	21.8883	21.556	23.845	21.541	23.3315	22.2538	21.7924	22.3625	21.9872	22.0959	23.7178	21.8137	21.165	22.7474
Q7L266	ASGL1_HUMAN	Isoaspartyl peptidase/L-asparaginase (EC 3.4.19.5) (EC 3.5.1.1) (Asparaginase-like protein 1) (Beta-aspartyl-peptidase) (Isoaspartyl dipeptidase) (L-asparagine amidohydrolase) [Cleaved into: Isoaspartyl peptidase/L-asparaginase alpha chain; Isoaspartyl peptidase/L-asparaginase beta chain]	ASRGL1 ALP CRASH	6	24.7194	24.493	25.2143	23.0285	23.6398	25.1189	23.7726	23.9445	23.4445	23.541	25.2159	25.3527	24.9254	23.3461	25.0273	24.7454	24.5125	24.896	23.4438	24.5208	24.3391	24.2612	24.5238	24.6762	24.1518	23.9625	24.5044	25.2612	23.3749	23.4442	25.1368	25.871	23.999	24.2345	24.0253	24.0118	24.3786	23.1063	24.9987	25.6407	23.4145	23.405	25.1723	23.6057	23.7593
Q9UBL3	ASH2L_HUMAN	Set1/Ash2 histone methyltransferase complex subunit ASH2 (ASH2-like protein)	ASH2L ASH2L1	2	20.6106	20.3159	21.1511	18.9322	1.55303	20.7123	20.1862	18.1757	18.4587	21.1716	20.8297	20.1615	21.2418	21.0484	20.4246	19.7367	18.1512	19.5429	18.6422	17.6307	19.1668	16.5744	19.1873	19.6915	19.3135	19.078	18.3678	20.4694	17.6567	18.8623	19.9015	20.0862	20.7661	17.5065	19.6216	19.1921	21.1554	19.64	20.8247	20.6155	20.6599	18.641	20.4787	19.7269	20.9173
P17405	ASM_HUMAN	Sphingomyelin phosphodiesterase (EC 3.1.4.12) (Acid sphingomyelinase) (aSMase)	SMPD1 ASM	3	23.0602	23.2802	23.3241	23.2835	23.1165	23.9562	23.6678	23.8488	23.7601	23.7632	23.2333	23.0151	22.6334	22.9365	23.3313	23.3225	22.5389	23.4686	22.8706	23.2115	23.0438	22.9924	22.9917	23.1281	23.0889	23.6812	22.659	22.9122	22.7047	22.5171	23.0905	23.9748	24.5431	23.411	23.4259	22.6097	23.701	22.7335	22.8776	23.7636	22.7833	22.8261	24.0237	22.7432	18.6473
O95671	ASML_HUMAN	Probable bifunctional dTTP/UTP pyrophosphatase/methyltransferase protein [Includes: dTTP/UTP pyrophosphatase (dTTPase/UTPase) (EC 3.6.1.9) (Nucleoside triphosphate pyrophosphatase) (Nucleotide pyrophosphatase) (Nucleotide PPase); N-acetylserotonin O-methyltransferase-like protein (ASMTL) (EC 2.1.1.-)]	ASMTL	8	23.6211	24.1837	24.2237	23.059	24.2279	23.9453	24.107	24.3021	23.668	23.7961	24.4878	24.2242	23.7178	23.6118	24.1783	24.0399	24.2062	23.352	24.1947	24.3819	24.5199	24.6841	24.0094	23.7678	24.0866	24.0777	25.7262	24.2191	22.93	23.8695	24.1757	24.1984	24.7257	23.9085	23.8725	24.2178	24.6374	23.1722	25.0476	25.0147	23.9642	25.5152	24.0671	22.4131	24.3091
P08243	ASNS_HUMAN	Asparagine synthetase [glutamine-hydrolyzing] (EC 6.3.5.4) (Cell cycle control protein TS11) (Glutamine-dependent asparagine synthetase)	ASNS TS11	2	20.305	21.5132	20.7461	21.8058	20.8235	21.2531	21.4123	22.3209	22.6354	20.8982	20.885	20.5664	20.1089	20.7087	19.7761	19.8006	20.745	20.534	23.0163	22.7636	21.8651	21.7799	19.8708	20.5498	21.7704	22.558	22.5295	21.1073	20.4749	22.0467	19.4433	20.5512	21.2342	23.1077	21.3449	22.3101	21.5622	21.109	20.9932	21.3048	21.3858	22.5704	21.7429	19.9562	18.8642
Q9BZE9	ASPC1_HUMAN	Tether containing UBX domain for GLUT4 (Alveolar soft part sarcoma chromosomal region candidate gene 1 protein) (Alveolar soft part sarcoma locus) (Renal papillary cell carcinoma protein 17) (UBX domain-containing protein 9)	ASPSCR1 ASPL RCC17 TUG UBXD9 UBXN9	3	23.0955	22.7593	22.229	22.3559	21.9626	22.6996	21.9765	22.4018	22.4947	22.5479	23.1211	23.2978	22.6805	22.9099	24.0415	22.2086	22.4335	23.5457	22.8713	23.9244	23.1002	21.97	22.2296	22.7524	23.8774	22.6902	22.1521	23.4837	21.4102	21.4757	23.3492	23.6322	23.6697	21.9935	22.055	22.5469	22.5874	22.1311	23.2528	23.1349	22.1875	22.7753	23.0146	22.2483	22.7851
P20933	ASPG_HUMAN	N(4)-(beta-N-acetylglucosaminyl)-L-asparaginase (EC 3.5.1.26) (Aspartylglucosaminidase) (Glycosylasparaginase) (N4-(N-acetyl-beta-glucosaminyl)-L-asparagine amidase) [Cleaved into: Glycosylasparaginase alpha chain; Glycosylasparaginase beta chain]	AGA	3	25.5205	25.0506	24.8821	24.7415	25.4675	24.9409	25.243	24.9224	27.0706	25.0428	25.7483	23.9253	24.6983	25.9238	24.9236	24.5666	23.1934	23.5927	22.7793	23.3535	24.0536	23.2815	23.9853	23.6615	24.258	24.2317	24.1199	24.4835	25.7256	24.8093	23.8569	24.7396	26.6872	23.6092	24.9129	25.3361	25.8118	25.4351	25.1059	25.3807	24.6913	25.0017	24.9223	24.9919	26.9125
Q12797	ASPH_HUMAN	Aspartyl/asparaginyl beta-hydroxylase (EC 1.14.11.16) (Aspartate beta-hydroxylase) (ASP beta-hydroxylase) (Peptide-aspartate beta-dioxygenase)	ASPH BAH	27	29.4966	30.444	30.3927	29.7522	29.9949	30.2918	30.5998	30.6141	30.4894	30.5158	30.1079	30.1587	30.4512	30.6504	30.3941	30.3779	30.2254	30.2548	30.0335	30.3279	29.9628	31.2496	30.832	30.1256	30.1097	30.3098	30.3362	30.3553	30.6081	30.2158	30.1325	30.3429	30.979	30.7257	30.4943	29.9323	30.1658	30.4435	29.5092	29.7758	30.0637	29.7031	30.2862	30.4582	31.0088
Q8IZT6	ASPM_HUMAN	Abnormal spindle-like microcephaly-associated protein (Abnormal spindle protein homolog) (Asp homolog)	ASPM MCPH5	2	19.8474	20.495	22.713	21.8367	21.1174	21.9787	23.0348	22.3891	22.6496	22.4098	21.5857	22.5605	22.2556	22.1111	23.0937	22.2158	22.3272	23.1993	22.6628	23.0203	22.6533	21.9782	22.44	22.5759	22.9885	22.7752	21.8477	22.5814	22.1626	21.3527	22.5981	22.7407	22.9058	21.4482	22.9094	22.4475	21.9945	22.3702	21.9555	22.5573	22.1886	22.1859	22.4978	22.1004	24.6433
Q96KQ4	ASPP1_HUMAN	Apoptosis-stimulating of p53 protein 1 (Protein phosphatase 1 regulatory subunit 13B)	PPP1R13B ASPP1 KIAA0771	1	18.133	19.988	19.5636	16.8453	20.7387	19.7349	19.9713	19.3405	19.1162	20.2828	20.6881	18.1694	16.8649	18.0704	18.6537	17.3199	18.2165	17.4484	17.6805	16.3223	19.456	17.2926	17.435	18.7407	19.2129	19.2929	16.5418	0.267996	17.4748	19.1718	17.9407	18.2781	20.8191	0.821812	18.5108	15.5815	20.2008	16.6941	19.104	18.3418	19.1936	19.5081	19.6287	16.083	19.9603
Q13625	ASPP2_HUMAN	Apoptosis-stimulating of p53 protein 2 (Bcl2-binding protein) (Bbp) (Renal carcinoma antigen NY-REN-51) (Tumor suppressor p53-binding protein 2) (53BP2) (p53-binding protein 2) (p53BP2)	TP53BP2 ASPP2 BBP	8	24.5461	24.8267	24.8644	24.9492	24.7312	25.2545	25.2969	24.3806	25.3082	25.6792	25.2308	24.6317	25.0256	24.5719	24.7613	24.5646	24.5823	24.4471	24.9153	24.6173	24.2217	24.8184	24.1008	24.3615	24.5791	25.1051	24.5312	25.0695	23.9263	25.3713	24.7174	24.7753	25.1351	23.4525	24.6026	23.6347	24.9875	24.9348	24.1905	25.039	24.6169	24.5314	24.8074	24.0973	25.3853
Q96CP6	ASTRA_HUMAN	Protein Aster-A (GRAM domain-containing protein 1A)	GRAMD1A KIAA1533	2	20.2382	20.6246	20.3493	19.9688	20.1783	21.3959	21.0887	19.976	20.0202	19.8634	19.3567	19.3728	18.8722	19.5964	20.491	19.5827	20.1862	20.1622	20.3194	20.5708	20.9311	20.716	20.3624	20.9627	20.3983	19.8647	19.3203	18.4526	19.5027	19.7764	19.4896	20.1666	21.633	18.2302	17.7646	19.934	19.3081	19.9012	18.3231	19.6333	20.6755	19.5202	20.1107	19.841	5.20668
Q3KR37	ASTRB_HUMAN	Protein Aster-B (GRAM domain-containing protein 1B)	GRAMD1B KIAA1201 UNQ3032/PRO9834	9	24.2999	22.9208	24.6683	24.8717	24.8189	25.0677	24.8378	24.129	25.5895	23.5282	23.7227	24.1675	25.0291	24.7117	24.9012	25.1521	25.148	24.6075	24.616	24.7796	24.8167	24.5656	24.6662	24.2429	24.8707	25.181	25.84	24.402	24.4657	25.3124	24.9732	23.241	25.0053	25.5028	23.8009	23.6992	24.6139	24.8623	23.4944	23.6787	24.6065	24.208	24.4451	24.7789	27.9223
Q8IYS0	ASTRC_HUMAN	Protein Aster-C (GRAM domain-containing protein 1C)	GRAMD1C UNQ2543/PRO6095	9	25.3778	25.3337	25.6157	25.4152	25.3602	25.5031	26.3039	25.859	26.3304	25.5654	25.0111	24.9852	25.4652	25.3861	25.3487	25.4708	25.2349	25.0809	25.1075	25.3741	25.4696	25.9602	25.3933	25.3262	25.6383	25.8612	25.8308	25.2581	26.1394	25.3924	25.3388	25.1916	25.8418	24.484	24.1942	25.099	25.3882	26.1613	24.6406	25.6018	25.6681	25.498	25.6119	25.9001	27.1042
O94823	AT10B_HUMAN	Phospholipid-transporting ATPase VB (EC 7.6.2.1) (ATPase class V type 10B) (P4-ATPase flippase complex alpha subunit ATP10B)	ATP10B ATPVB KIAA0715	4	23.7567	24.535	23.3795	24.3052	23.812	23.8288	23.7942	24.1044	25.6763	24.2974	24.5141	23.1755	22.9844	22.698	23.0732	23.4673	22.3203	23.2971	22.4199	23.8679	22.4183	23.4071	24.1276	23.2161	23.628	23.9068	23.4906	23.7705	23.5519	23.4714	23.4949	23.5024	24.5211	22.8441	24.3168	23.4399	24.3727	24.4055	23.8979	23.3164	23.5832	24.1067	23.5634	23.6112	25.6666
Q9P241	AT10D_HUMAN	Phospholipid-transporting ATPase VD (EC 7.6.2.1) (ATPase class V type 10D) (P4-ATPase flippase complex alpha subunit ATP10D)	ATP10D ATPVD KIAA1487	1	20.8315	17.4391	18.6155	20.7224	21.1917	13.4088	16.3356	19.8489	19.7052	14.4786	22.0916	13.9671	20.1865	20.0069	15.5074	19.5386	12.1727	14.9447	11.0604	15.5993	15.1344	19.4522	16.8543	18.4748	19.0699	14.103	19.6996	15.3765	19.0507	19.6195	17.765	15.4822	13.2989	19.4626	14.1536	17.2722	13.0619	19.9206	15.6665	15.9875	19.2375	19.7435	17.9544	17.615	22.5496
P98196	AT11A_HUMAN	Phospholipid-transporting ATPase IH (EC 7.6.2.1) (ATPase IS) (ATPase class VI type 11A) (P4-ATPase flippase complex alpha subunit ATP11A)	ATP11A ATPIH ATPIS KIAA1021	18	27.2962	27.502	26.4999	26.7653	26.0148	27.4417	27.2924	26.4957	27.0047	27.5914	26.2158	27.3782	27.3765	27.9606	27.4912	26.7641	26.568	27.7715	26.3268	26.6071	26.7765	26.4516	26.5908	27.2871	26.8454	26.5746	26.6991	27.9124	26.9481	26.4986	27.8721	28.0054	27.162	27.2543	26.4498	27.4873	27.2706	27.1506	27.1956	27.6675	27.3864	27.3641	27.1439	26.3479	29.6943
Q9Y2G3	AT11B_HUMAN	Phospholipid-transporting ATPase IF (EC 7.6.2.1) (ATPase IR) (ATPase class VI type 11B) (P4-ATPase flippase complex alpha subunit ATP11B)	ATP11B ATPIF ATPIR KIAA0956	3	23.9185	23.6121	22.7273	23.0853	22.6487	23.1639	23.0753	23.5177	24.9279	23.3203	22.4916	22.8751	23.0599	23.7105	23.3852	23.5688	22.9034	23.4615	22.4088	22.7497	22.661	23.7404	22.93	23.4563	23.0876	22.6707	22.8857	22.7825	23.6631	23.2376	23.3932	23.4348	22.3626	23.0636	23.2407	23.2755	22.6051	23.3697	22.8341	23.3848	23.5741	23.7326	23.2677	23.2682	23.6025
Q8NB49	AT11C_HUMAN	Phospholipid-transporting ATPase IG (EC 7.6.2.1) (ATPase IQ) (ATPase class VI type 11C) (P4-ATPase flippase complex alpha subunit ATP11C)	ATP11C ATPIG ATPIQ	23	29.1581	29.7551	28.7296	28.3343	28.5489	29.1769	29.2123	29.7451	29.8032	29.0351	28.3999	28.8078	28.7298	28.498	28.5753	28.7809	28.3925	28.6802	28.2027	28.1905	28.2793	28.786	28.4997	29.3532	28.4038	28.6045	28.2025	29.4958	28.9993	28.2478	28.3994	29.3829	29.5969	28.5128	29.0265	29.3953	28.281	28.0483	29.1426	29.2105	28.9867	28.5521	29.1175	28.8078	29.7529
P54707	AT12A_HUMAN	Potassium-transporting ATPase alpha chain 2 (EC 7.2.2.19) (Non-gastric H(+)/K(+) ATPase subunit alpha) (Proton pump)	ATP12A ATP1AL1	4	31.1108	31.1892	30.2891	30.8559	29.6959	31.0596	31.0316	30.534	31.4092	30.9504	29.7523	30.8397	31.0991	31.5614	30.7904	30.4439	29.9277	31.0614	30.0739	30.5166	30.3448	30.1592	30.2264	30.9309	30.2644	29.837	30.1511	31.7646	30.8711	30.1131	31.2905	31.2948	30.6169	31.5682	31.1444	31.1185	30.7435	30.9304	30.7307	31.5484	31.1156	30.6215	30.9771	30.6968	33.7324
Q9HD20	AT131_HUMAN	Endoplasmic reticulum transmembrane helix translocase (EC 7.4.2.-) (Endoplasmic reticulum P5A-ATPase)	ATP13A1 ATP13A KIAA1825 CGI-152	44	29.8099	30.4092	30.2238	29.9089	29.9468	30.6504	30.786	30.6587	30.8641	30.4483	29.9798	30.3765	30.0711	30.2099	30.6017	30.3102	29.9287	30.23	30.067	30.3904	30.2004	30.6709	30.7023	30.4612	30.5117	30.4873	30.9317	30.7514	30.3949	30.1533	30.0551	30.2349	30.9722	30.3431	30.1705	30.308	30.2992	30.0654	29.6418	30.8498	30.2778	29.9278	30.5378	30.595	31.586
Q9NQ11	AT132_HUMAN	Polyamine-transporting ATPase 13A2 (EC 7.6.2.-)	ATP13A2 PARK9	5	23.2197	24.4054	24.0958	23.7824	23.286	24.5357	24.6491	24.1092	24.3856	24.2297	23.4425	23.2067	23.1798	23.2485	23.4918	22.5656	22.9464	23.676	23.2087	24.2492	22.922	23.8952	23.7341	23.557	22.9218	23.2377	23.6493	23.9576	23.5832	23.5744	22.4815	23.7411	24.5477	25.1058	24.3475	23.771	24.3135	24.1316	23.8901	24.2339	23.831	24.0584	23.4483	22.929	22.9652
Q9H7F0	AT133_HUMAN	Probable cation-transporting ATPase 13A3 (EC 7.2.2.-) (ATPase family homolog up-regulated in senescence cells 1)	ATP13A3 AFURS1	16	26.8557	26.8891	26.6121	26.6106	25.987	26.9443	27.1034	26.6967	27.1317	26.6884	26.4009	26.8469	27.0517	26.7405	26.7241	26.6631	26.4722	27.2372	26.2137	26.5678	26.4942	26.6612	26.5246	26.9156	26.6043	26.548	26.8067	27.1197	26.8225	26.6805	26.6486	26.8797	26.6256	26.9337	26.2409	26.2883	26.8483	27.1726	26.3655	26.7499	26.6579	26.3607	26.8188	26.432	28.99
Q4VNC1	AT134_HUMAN	Probable cation-transporting ATPase 13A4 (EC 7.2.2.-) (P5-ATPase isoform 4)	ATP13A4 UNQ3052/PRO9871	3	22.5297	21.8525	21.5394	21.5233	20.2615	23.2559	22.4245	22.5561	23.0465	23.6112	21.5081	22.5638	21.8586	22.0746	22.0949	21.4381	21.271	22.1529	20.4143	21.8011	21.8196	22.4111	21.4867	22.8145	22.0397	21.7694	21.0293	22.6205	21.9472	20.892	22.3585	23.991	23.2346	20.9187	22.7066	22.5715	22.754	21.4363	22.5972	22.8741	22.0493	23.8534	22.8895	20.8898	23.402
P05023	AT1A1_HUMAN	Sodium/potassium-transporting ATPase subunit alpha-1 (Na(+)/K(+) ATPase alpha-1 subunit) (EC 7.2.2.13) (Sodium pump subunit alpha-1)	ATP1A1	50	34.8619	34.9181	33.9464	34.4799	33.5248	34.7852	34.5673	33.7695	34.7398	34.6102	33.8105	34.6572	34.9455	35.4063	34.6561	34.0756	33.7122	34.8435	33.4609	34.2343	34.1519	33.9045	34.0272	34.7561	34.0438	33.653	33.9707	35.7021	34.607	33.83	35.1409	35.3208	34.2259	34.6938	34.2084	34.8329	34.4268	34.7632	34.5314	34.9264	34.7453	34.2685	34.4547	34.0401	37.2106
P50993	AT1A2_HUMAN	Sodium/potassium-transporting ATPase subunit alpha-2 (Na(+)/K(+) ATPase alpha-2 subunit) (EC 7.2.2.13) (Sodium pump subunit alpha-2)	ATP1A2 KIAA0778	26	33.9245	33.6477	32.9815	33.7345	32.533	33.7536	33.6817	33.1213	33.9199	33.6145	32.92	33.7571	34.1289	34.7043	33.787	33.3517	32.9104	34.0019	32.9728	33.4267	33.2605	33.1122	33.1691	33.9018	33.1433	32.991	33.2301	34.6999	33.9891	33.093	34.2118	34.3065	33.2754	34.3276	33.5957	33.8215	33.4304	33.9853	33.5625	33.994	33.8986	33.4803	33.5349	33.5542	36.2983
P13637	AT1A3_HUMAN	Sodium/potassium-transporting ATPase subunit alpha-3 (Na(+)/K(+) ATPase alpha-3 subunit) (EC 7.2.2.13) (Na(+)/K(+) ATPase alpha(III) subunit) (Sodium pump subunit alpha-3)	ATP1A3	44	33.8782	33.7348	32.9896	33.6211	32.5101	33.7573	33.7644	33.2338	33.8845	33.5788	32.7864	33.6883	33.9962	34.5238	33.6938	33.3123	32.8686	33.8835	33.016	33.4043	33.1466	33.1215	33.1094	33.8732	33.141	32.9873	33.0956	34.5008	33.8953	33.0396	34.0536	34.1738	33.422	34.5013	33.7667	33.7837	33.5829	33.8178	33.4453	33.8958	33.9093	33.4638	33.5356	33.6306	36.5117
Q13733	AT1A4_HUMAN	Sodium/potassium-transporting ATPase subunit alpha-4 (Na(+)/K(+) ATPase alpha-4 subunit) (EC 7.2.2.13) (Sodium pump subunit alpha-4)	ATP1A4 ATP1AL2	9	32.4716	32.393	31.5408	32.1264	31.0909	32.3658	32.3132	31.7159	32.6059	32.1595	31.1632	32.0892	32.4367	32.9566	32.0872	31.7721	31.2157	32.3403	31.2689	31.768	31.6536	31.4933	31.5548	32.2535	31.6059	31.1944	31.5744	33.0614	32.2475	31.5524	32.5142	32.6213	32.0682	32.8338	32.2208	32.397	32.1581	32.35	32.0506	32.6319	32.4155	32.0029	32.192	31.9489	34.9013
P05026	AT1B1_HUMAN	Sodium/potassium-transporting ATPase subunit beta-1 (Sodium/potassium-dependent ATPase subunit beta-1)	ATP1B1 ATP1B	20	33.2702	33.2791	32.4367	32.8079	31.8942	33.1276	33.0057	32.4485	33.2211	33.0577	32.368	33.163	33.4101	33.8721	33.2875	32.6727	32.1383	33.4933	31.7084	32.6697	32.5676	32.5838	32.6086	33.3973	32.5142	31.9603	32.4005	34.176	33.3346	32.5214	33.697	33.8688	32.903	32.807	32.5519	33.3067	32.8216	33.3925	32.9066	33.5736	33.2492	32.9937	33.0932	32.4487	35.6482
P14415	AT1B2_HUMAN	Sodium/potassium-transporting ATPase subunit beta-2 (Adhesion molecule in glia) (AMOG) (Sodium/potassium-dependent ATPase subunit beta-2)	ATP1B2	10	29.0739	27.5805	27.4956	28.6884	27.1317	27.9356	28.5413	28.5503	28.6222	27.6939	27.7951	27.1118	27.9036	27.9354	27.0793	26.9231	27.8877	27.2954	29.0916	28.1946	27.2875	26.7037	27.3131	27.2019	26.5488	28.6364	28.2588	27.7642	27.7193	27.6153	27.623	27.7379	28.1244	30.7132	29.8122	28.2187	28.7933	28.4489	28.0714	28.732	28.1181	28.2094	27.8692	29.8362	29.2631
P54709	AT1B3_HUMAN	Sodium/potassium-transporting ATPase subunit beta-3 (Sodium/potassium-dependent ATPase subunit beta-3) (ATPB-3) (CD antigen CD298)	ATP1B3	9	29.059	28.8374	27.4477	28.8348	27.4525	28.8903	29.2324	28.5967	29.1435	28.5404	27.7415	28.6573	28.8268	30.3385	28.4481	28.4813	27.9079	29.4392	27.3672	28.5218	28.4259	28.0104	28.1699	28.7547	28.5323	27.5897	28.121	29.3233	28.4036	28.1735	29.414	29.3685	28.1504	29.1766	28.4759	29.1843	29.0864	28.362	29.4047	29.126	29.0678	28.9533	28.8345	27.0559	29.2138
O14983	AT2A1_HUMAN	Sarcoplasmic/endoplasmic reticulum calcium ATPase 1 (SERCA1) (SR Ca(2+)-ATPase 1) (EC 7.2.2.10) (Calcium pump 1) (Calcium-transporting ATPase sarcoplasmic reticulum type, fast twitch skeletal muscle isoform) (Endoplasmic reticulum class 1/2 Ca(2+) ATPase)	ATP2A1	16	31.2749	32.1811	31.5997	31.455	31.3581	32.2081	32.4112	32.0168	32.6833	31.7349	31.2018	31.7146	31.7641	31.7781	31.6925	31.956	31.1853	31.4514	31.3051	31.9704	31.46	32.3278	31.9788	31.9099	32.1124	31.8522	32.3328	32.1553	31.9147	31.9423	31.731	31.9432	32.5056	31.7165	31.8851	31.8886	32.2352	32.1681	31.1641	31.9775	31.8612	31.2958	31.9704	31.8595	33.1063
P16615	AT2A2_HUMAN	Sarcoplasmic/endoplasmic reticulum calcium ATPase 2 (SERCA2) (SR Ca(2+)-ATPase 2) (EC 7.2.2.10) (Calcium pump 2) (Calcium-transporting ATPase sarcoplasmic reticulum type, slow twitch skeletal muscle isoform) (Endoplasmic reticulum class 1/2 Ca(2+) ATPase)	ATP2A2 ATP2B	46	32.4319	33.2359	32.7159	32.5852	32.5624	33.2212	33.4327	33.2501	33.8477	32.8228	32.466	32.6551	32.7591	32.8274	32.774	33.0308	32.2946	32.5946	32.5037	32.8985	32.6129	33.3069	33.0777	32.9613	33.0939	32.9095	33.353	33.0451	32.9576	33.0448	32.756	32.8662	33.5929	32.8499	33.1052	32.9672	33.2772	33.1938	32.3039	33.1018	32.862	32.4987	33.1439	33.1234	34.3591
Q93084	AT2A3_HUMAN	Sarcoplasmic/endoplasmic reticulum calcium ATPase 3 (SERCA3) (SR Ca(2+)-ATPase 3) (EC 7.2.2.10) (Calcium pump 3)	ATP2A3	9	30.8184	31.5953	30.9695	30.9693	30.8149	31.5817	31.866	31.662	32.2753	31.172	30.6771	31.0719	31.0746	31.1573	31.0042	31.3637	30.5759	30.8321	30.9291	31.298	30.9275	31.719	31.5369	31.2823	31.3925	31.2301	31.8462	31.4382	31.2547	31.4136	30.9626	31.1086	31.8744	31.2192	31.4994	31.5127	31.6986	31.6315	30.6087	31.5326	31.1933	30.8361	31.5886	31.5857	32.3666
P20020	AT2B1_HUMAN	Plasma membrane calcium-transporting ATPase 1 (EC 7.2.2.10) (Plasma membrane calcium ATPase isoform 1) (PMCA1) (Plasma membrane calcium pump isoform 1)	ATP2B1 PMCA1	27	28.6519	28.8787	28.0155	28.2835	27.7491	28.6696	28.7536	28.1246	28.8723	28.8163	27.8738	28.5062	28.5887	29.3063	28.5206	28.244	27.661	28.4344	28.2901	28.582	28.1118	28.1295	28.2945	28.5022	27.9723	27.9509	28.4209	29.0843	28.744	28.1705	28.8219	28.9986	28.5838	29.167	28.6183	28.6394	28.8312	28.6995	28.4854	28.6669	28.7554	28.5601	28.2902	28.825	31.164
Q01814	AT2B2_HUMAN	Plasma membrane calcium-transporting ATPase 2 (PMCA2) (EC 7.2.2.10) (Plasma membrane calcium ATPase isoform 2) (Plasma membrane calcium pump isoform 2)	ATP2B2 PMCA2	37	29.9295	29.8688	28.9338	29.1468	28.6509	29.6028	29.7601	28.908	29.2336	30.1368	29.2362	29.9139	29.9734	30.7559	29.9354	29.1103	28.6791	29.9123	28.5728	29.0779	29.1809	28.7625	29.0328	29.7599	29.1157	29.0303	28.9836	30.627	29.593	28.9466	30.4589	30.4596	29.5046	28.8071	29.3831	29.8388	29.5618	29.8795	29.6363	30.1539	29.8217	29.8592	29.2349	29.0723	32.1314
Q16720	AT2B3_HUMAN	Plasma membrane calcium-transporting ATPase 3 (PMCA3) (EC 7.2.2.10) (Plasma membrane calcium ATPase isoform 3) (Plasma membrane calcium pump isoform 3)	ATP2B3	18	27.7156	28.0447	27.1376	27.4159	26.8789	27.7836	28.1409	27.347	28.0501	27.9418	26.9284	27.7436	27.5725	28.6264	27.5651	27.3965	26.665	27.8655	27.2077	27.5786	27.2327	27.3196	27.5088	27.8584	27.0981	26.9276	27.4411	28.2492	28.0636	27.3168	28.0135	28.223	27.869	28.0554	27.7363	27.7573	27.6861	27.8447	27.7535	28.0331	28.2368	27.8251	27.4177	27.6107	30.3631
P23634	AT2B4_HUMAN	Plasma membrane calcium-transporting ATPase 4 (PMCA4) (EC 7.2.2.10) (Matrix-remodeling-associated protein 1) (Plasma membrane calcium ATPase isoform 4) (Plasma membrane calcium pump isoform 4)	ATP2B4 ATP2B2 MXRA1	23	28.3375	28.3817	27.3696	27.6584	27.7785	28.0066	28.4372	27.6918	28.5232	28.0902	27.4024	27.9132	28.2231	28.9675	27.7298	28.4198	27.1394	27.9193	28.0267	28.4527	27.7936	27.7229	28.3636	28.2336	27.3776	27.2515	28.12	28.6664	28.3827	27.9852	28.499	28.3946	28.39	28.9541	28.4645	28.1902	28.6636	28.1735	28.6854	28.648	28.3726	27.9186	27.7	28.3104	30.6222
P98194	AT2C1_HUMAN	Calcium-transporting ATPase type 2C member 1 (ATPase 2C1) (EC 7.2.2.10) (ATP-dependent Ca(2+) pump PMR1)	ATP2C1 KIAA1347 PMR1L HUSSY-28	21	27.9605	29.4103	28.9562	29.0024	29.1613	29.1839	29.2988	29.4242	29.9498	28.4066	28.8066	28.8037	28.5361	28.468	28.7731	29.0087	28.5687	29.0704	28.8733	29.0872	28.972	28.9136	29.4261	29.4253	28.6264	28.928	29.0047	29.11	29.0846	29.1533	28.4929	28.7536	30.0438	29.6038	29.0861	29.0201	29.2934	29.1981	28.0873	29.158	28.8045	28.8551	28.9767	29.08	30.5714
Q8IUZ5	AT2L2_HUMAN	5-phosphohydroxy-L-lysine phospho-lyase (EC 4.2.3.134) (Alanine--glyoxylate aminotransferase 2-like 2)	PHYKPL AGXT2L2 PP9286	1	19.8883	19.6578	19.5295	19.3081	18.4665	19.7212	17.7605	19.277	19.4214	19.0473	19.6697	19.8614	18.7962	19.6189	19.8691	19.4667	19.7518	19.7818	19.7923	20.6299	19.7999	18.7665	19.2726	18.6283	19.3317	20.511	20.4495	20.0069	18.3946	17.6694	20.1147	20.1694	18.868	20.1198	17.2565	19.8601	19.0011	19.0724	20.1885	20.3315	18.4607	18.6605	18.9189	19.1168	19.6126
Q5VTU8	AT5EL_HUMAN	ATP synthase subunit epsilon-like protein, mitochondrial (ATP synthase F1 subunit epsilon pseudogene 2)	ATP5F1EP2 ATP5EP2	2	25.5125	27.3074	27.6669	26.6861	26.5876	27.528	27.7484	26.3079	27.3607	27.4371	26.7758	27.6903	27.7332	27.2792	27.4113	28.1876	27.1503	28.0107	27.6509	27.0806	27.5858	27.4716	26.827	28.195	27.2208	27.3221	26.565	27.6461	27.8231	27.3077	27.6466	27.2815	27.9069	26.5358	27.9205	25.7266	26.9891	27.2986	26.2162	27.1798	26.7166	26.0552	26.6884	28.425	29.9649
P24539	AT5F1_HUMAN	ATP synthase F(0) complex subunit B1, mitochondrial (ATP synthase peripheral stalk-membrane subunit b) (ATP synthase proton-transporting mitochondrial F(0) complex subunit B1) (ATP synthase subunit b) (ATPase subunit b)	ATP5PB ATP5F1	16	30.337	31.5396	31.8693	30.9663	30.8705	31.7581	32.217	30.7686	31.7496	31.6274	30.9715	31.485	31.6468	31.3928	31.2383	31.8354	31.0278	31.6111	31.3533	31.0454	31.3425	31.3445	30.7292	32.0729	31.2387	31.2358	30.7295	31.2253	31.7663	31.2526	31.3279	31.3188	32.1378	31.6771	32.1964	30.3158	31.3081	31.6399	30.7652	31.516	31.286	30.8221	31.2628	32.0848	32.1769
Q9Y2Q0	AT8A1_HUMAN	Phospholipid-transporting ATPase IA (EC 7.6.2.1) (ATPase class I type 8A member 1) (Chromaffin granule ATPase II) (P4-ATPase flippase complex alpha subunit ATP8A1)	ATP8A1 ATPIA	29	29.1262	29.3834	29.1033	29.8806	28.4604	29.5278	30.0791	29.2655	30.2965	29.2971	28.7055	29.5226	30.0695	30.0113	29.5073	29.7076	29.1859	29.3964	29.1376	29.3906	29.3805	29.8394	29.3926	29.6592	29.9837	29.4214	30.18	29.8476	30.1053	29.9027	29.8772	30.0145	29.5096	29.1951	29.6048	29.368	29.7406	29.6376	29.0655	29.9133	29.8094	29.4213	29.4935	30.1796	31.2522
Q9NTI2	AT8A2_HUMAN	Phospholipid-transporting ATPase IB (EC 7.6.2.1) (ATPase class I type 8A member 2) (ML-1) (P4-ATPase flippase complex alpha subunit ATP8A2)	ATP8A2 ATPIB	7	20.9051	20.7692	21.3383	23.2205	21.0703	22.0923	21.4983	22.3384	21.2481	21.1781	21.9553	20.6556	22.8175	23.0833	21.0978	19.684	20.8085	21.1926	23.6566	21.2478	20.1684	20.0075	20.0844	22.373	20.4579	22.6358	22.4889	21.6457	22.0371	20.0487	23.0722	22.3513	20.4724	25.3545	24.2182	22.976	23.2703	23.1372	21.7458	21.1	21.0234	19.9731	21.4226	23.6758	23.9716
Q8NBU5	ATAD1_HUMAN	Outer mitochondrial transmembrane helix translocase (EC 7.4.2.-) (ATPase family AAA domain-containing protein 1) (hATAD1) (Thorase)	ATAD1 FNP001	14	28.4007	30.1477	29.9288	29.4296	29.5237	29.9426	30.347	29.3592	30.2341	30.1882	29.6767	29.3087	29.7854	29.5366	29.4699	30.1081	28.987	29.8303	28.9864	29.2047	29.4391	29.3589	29.0558	30.0584	29.7912	29.5021	29.1149	29.6269	30.1717	29.0635	29.7667	29.2005	30.3156	28.6107	30.3438	28.7854	29.5941	30.1642	29.173	29.4861	29.5967	29.4087	29.6541	30.0302	30.9178
Q9NVI7	ATD3A_HUMAN	ATPase family AAA domain-containing protein 3A	ATAD3A	17	28.1175	29.0778	29.4952	28.7679	28.835	29.3857	30.1045	28.3973	29.2035	29.2608	29.6643	29.1441	29.4592	29.1449	29.1415	29.4842	28.3467	29.248	28.3424	28.613	28.8057	28.1753	28.2121	29.3825	28.8519	29.0935	27.9838	28.8475	29.3866	28.837	28.9929	28.6191	29.5898	28.8338	30.025	27.813	29.3548	29.0756	28.4887	28.969	28.9634	28.9732	28.895	29.3048	30.033
Q5T9A4	ATD3B_HUMAN	ATPase family AAA domain-containing protein 3B (AAA-TOB3)	ATAD3B KIAA1273 TOB3	11	27.1978	28.088	28.5446	27.9123	28.2015	28.3908	29.0895	27.372	28.3799	28.1917	28.781	28.2748	28.6566	28.187	28.193	28.5621	27.5755	28.3366	27.5761	27.8767	27.9254	27.472	27.3719	28.4876	27.962	28.1584	27.2617	27.9156	28.5213	28.0032	28.0856	27.6753	28.4737	27.8926	28.997	27.0362	28.2292	28.2826	27.4399	28.109	27.9986	27.7606	27.9122	28.5622	29.6909
Q5T2N8	ATD3C_HUMAN	ATPase family AAA domain-containing protein 3C	ATAD3C	6	26.8757	27.8518	28.1634	27.4252	27.3427	27.9843	28.8342	27.2119	28.0369	28.0437	28.437	27.745	28.1271	27.9796	27.6727	28.1345	26.7838	27.846	26.9382	27.1939	27.2741	26.7729	26.9264	28.0829	27.5446	27.7322	26.6089	27.6578	28.189	27.6105	27.7015	27.324	28.4007	27.7021	28.7736	26.6185	28.0734	27.8537	27.3861	27.6686	27.6825	27.9434	27.6636	27.9694	28.3623
O95260	ATE1_HUMAN	Arginyl-tRNA--protein transferase 1 (Arginyltransferase 1) (R-transferase 1) (EC 2.3.2.8) (Arginine-tRNA--protein transferase 1)	ATE1	4	22.366	23.3698	22.911	22.4405	22.9175	23.3632	23.364	23.8561	23.634	23.1237	23.1973	22.0883	21.7939	22.195	22.5772	21.8628	23.8942	21.8789	23.2788	22.3045	22.6511	23.703	22.8053	22.1698	22.5396	23.174	23.4995	22.8113	21.47	21.931	22.6314	22.899	24.232	22.4882	23.0425	23.885	23.9864	22.1982	23.4001	23.6347	22.5978	23.5341	23.2579	21.7285	22.8151
O75143	ATG13_HUMAN	Autophagy-related protein 13	ATG13 KIAA0652	2	17.917	22.2799	17.4169	20.151	20.4389	17.5059	21.3118	20.6188	21.18	17.7827	19.7059	20.1535	17.1354	18.1209	19.7492	20.6262	21.1415	18.6316	21.0026	19.9009	20.8316	19.9921	20.9399	18.2527	20.0724	21.5742	20.5428	19.9319	19.7382	21.3841	19.2287	20.1951	17.4521	18.1967	18.8062	19.7103	17.2273	19.2481	19.8489	21.7144	19.1423	20.6977	19.6317	18.6889	19.321
Q96BY7	ATG2B_HUMAN	Autophagy-related protein 2 homolog B	ATG2B C14orf103	3	24.5319	26.2772	24.5756	22.3626	24.1698	22.8495	23.5558	23.0697	24.1343	25.0316	21.9967	24.4195	23.5986	24.2683	22.4849	22.6956	23.3739	24.8074	26.4059	23.8549	23.6184	23.3569	26.0661	26.3258	23.1915	24.5742	23.2648	26.4119	25.6938	23.9877	26.1834	23.7373	22.8571	21.8144	22.4904	24.6792	21.7622	22.2797	24.857	23.4272	23.5898	22.8166	21.3261	27.9063	25.5487
Q9NT62	ATG3_HUMAN	Ubiquitin-like-conjugating enzyme ATG3 (EC 2.3.2.-) (Autophagy-related protein 3) (APG3-like) (hApg3) (Protein PC3-96)	ATG3 APG3 APG3L	4	24.7068	24.1487	23.6105	24.357	24.6486	24.1488	24.1867	24.9631	25.0334	24.1021	24.6815	24.6356	24.7867	24.0472	24.2789	24.1789	25.833	24.1945	25.4923	25.2259	25.3082	25.7408	24.7664	23.9348	24.1346	25.2809	25.9408	24.8228	23.519	24.7963	24.2351	24.0396	24.1061	24.781	24.0445	25.3047	24.612	23.5425	25.0801	24.4474	23.8841	25.6825	24.0927	23.645	25.6027
Q9Y4P1	ATG4B_HUMAN	Cysteine protease ATG4B (EC 3.4.22.-) (AUT-like 1 cysteine endopeptidase) (Autophagin-1) (Autophagy-related cysteine endopeptidase 1) (Autophagy-related protein 4 homolog B) (hAPG4B)	ATG4B APG4B AUTL1 KIAA0943	2	21.3045	21.3203	20.0146	20.9235	20.8533	20.1786	19.3777	20.948	20.9094	20.1831	20.4333	20.4257	21.5939	21.3394	20.7092	20.0609	22.2053	19.0879	21.2961	21.0864	20.2182	21.7667	20.4852	20.1623	20.575	20.9983	23.5401	21.5093	18.9424	21.535	21.0315	20.3461	21.0029	23.2647	20.9249	21.2215	21.1982	20.4511	21.1022	21.526	20.2107	22.0458	20.9712	21.9143	22.6106
Q9H1Y0	ATG5_HUMAN	Autophagy protein 5 (APG5-like) (Apoptosis-specific protein)	ATG5 APG5L ASP	4	23.0355	23.2142	22.6415	23.4537	22.9588	23.1172	23.1353	23.6005	23.5411	22.6961	22.866	23.129	23.0471	22.6468	23.0597	22.2901	24.1677	22.5489	23.6821	23.6038	23.5239	24.1843	23.8963	22.613	22.8702	23.9159	24.3278	23.9282	22.2179	23.9225	22.809	23.0358	23.1517	23.1731	23.1741	23.594	23.6183	22.1722	23.4772	23.535	22.355	23.9781	23.1364	22.4918	22.979
O95352	ATG7_HUMAN	Ubiquitin-like modifier-activating enzyme ATG7 (ATG12-activating enzyme E1 ATG7) (Autophagy-related protein 7) (APG7-like) (hAGP7) (Ubiquitin-activating enzyme E1-like protein)	ATG7 APG7L	5	24.5997	24.2025	23.7904	23.5253	23.6289	23.7878	23.2298	24.0639	23.6068	23.7566	23.8137	22.9648	22.9014	23.2729	23.1661	22.8737	23.3334	22.8726	23.2948	22.6074	23.4811	21.5558	22.9327	22.7016	22.9428	22.7493	22.8127	23.1059	22.0161	22.3427	23.3541	22.9488	24.1512	24.3251	23.5937	24.3099	24.2839	23.3096	24.3713	24.4279	23.1004	24.0177	23.4758	22.6548	22.9226
Q9UII2	ATIF1_HUMAN	ATPase inhibitor, mitochondrial (ATP synthase F1 subunit epsilon) (Inhibitor of F(1)F(o)-ATPase) (IF(1)) (IF1)	ATP5IF1 ATPI ATPIF1	2	27.2461	26.2445	27.0224	25.7245	27.9222	26.1471	25.8597	25.1131	26.3717	26.275	28.5561	26.0493	25.2116	25.389	24.9516	26.5991	24.2189	26.1354	25.2925	25.243	25.1235	25.0961	24.8204	26.4556	25.3423	24.9211	24.9087	25.7408	26.9224	25.5099	25.8784	25.5178	26.4506	24.7005	26.8053	24.0034	23.7878	27.7619	25.4826	26.2447	25.5611	26.6152	25.6946	26.3798	27.9187
Q6UY14	ATL4_HUMAN	ADAMTS-like protein 4 (ADAMTSL-4) (Thrombospondin repeat-containing protein 1)	ADAMTSL4 TSRC1 PP1396 UNQ2803/PRO34012	5	22.1024	21.9686	22.7257	24.2395	24.0193	22.8718	23.1612	25.302	22.4863	23.3339	23.2784	22.8614	23.8744	22.2314	22.7194	22.7236	22.674	23.3782	22.9664	23.5973	23.0901	22.0365	23.2849	22.7247	23.0926	22.9208	23.281	23.8602	23.0447	23.5966	22.6851	22.877	23.4128	22.6216	21.8761	21.888	22.7931	23.5519	21.5464	22.6743	22.5371	22.2019	22.0739	22.754	25.6375
Q8WXF7	ATLA1_HUMAN	Atlastin-1 (EC 3.6.5.-) (Brain-specific GTP-binding protein) (GTP-binding protein 3) (GBP-3) (hGBP3) (Guanine nucleotide-binding protein 3) (Spastic paraplegia 3 protein A)	ATL1 GBP3 SPG3A	2	17.3685	19.8636	19.9214	17.6073	20.967	19.7667	15.0625	18.0802	17.0908	20.6081	18.5332	18.81	17.0303	17.4012	16.7614	1.05081	20.4638	18.7799	20.0465	19.7952	18.5215	16.7434	17.8313	16.78	17.6985	16.6338	20.5369	18.1917	18.3116	18.0239	17.9571	18.9998	22.2645	18.7609	19.678	20.9804	21.1229	18.5079	21.4322	18.4977	18.0518	20.0036	16.5778	15.3456	18.0244
Q8NHH9	ATLA2_HUMAN	Atlastin-2 (EC 3.6.5.-) (ADP-ribosylation factor-like protein 6-interacting protein 2) (ARL-6-interacting protein 2) (Aip-2)	ATL2 ARL6IP2	9	25.8315	27.4399	27.0491	26.6107	26.8854	27.1372	27.2541	27.1551	26.9179	26.9533	27.0373	26.7756	26.4963	26.7147	27.1144	26.5498	26.7374	26.5572	26.8394	26.7012	26.959	26.6597	26.8102	26.8583	26.806	27.1318	27.2006	27.5762	26.5674	26.8989	26.8039	27.2384	27.7298	26.3835	26.9122	27.2707	27.6777	26.6482	27.2677	27.0831	26.6563	26.7933	26.5667	26.4194	29.0357
Q6DD88	ATLA3_HUMAN	Atlastin-3 (EC 3.6.5.-)	ATL3	23	30.8789	31.7897	31.0994	31.0322	30.8951	31.4411	31.7455	31.5304	32.3165	31.4872	31.1301	31.0803	31.1464	31.3875	31.4546	31.3166	31.2367	31.2841	31.3319	31.2173	31.6705	31.6016	31.4436	31.6503	31.7131	31.548	31.6753	31.8798	31.489	31.2518	31.557	31.5711	32.1925	30.3613	31.495	31.503	31.8051	31.4771	31.1644	31.7137	31.4144	31.5217	31.4639	31.3493	32.6767
Q13315	ATM_HUMAN	Serine-protein kinase ATM (EC 2.7.11.1) (Ataxia telangiectasia mutated) (A-T mutated)	ATM	3	21.3588	21.5511	21.1743	20.6689	19.7831	21.6286	21.4658	20.4248	21.7112	21.5303	20.4113	21.0393	21.1754	20.9105	21.1559	21.0719	19.8509	20.0805	20.3434	21.0043	20.8789	20.0152	19.9544	19.5441	20.7532	20.3255	20.225	21.1926	20.1732	20.2463	20.4036	20.7359	21.3602	21.1303	20.2407	20.4056	20.9453	19.5541	20.0702	20.9679	21.0992	20.962	20.7624	19.8433	21.6244
O00244	ATOX1_HUMAN	Copper transport protein ATOX1 (Metal transport protein ATX1)	ATOX1 HAH1	3	25.3848	26.4971	25.9843	24.4265	25.6559	25.8935	25.7598	24.8862	25.6257	25.6728	26.2372	25.8546	24.7506	24.9012	25.5259	25.2271	24.8763	25.2565	25.084	25.272	25.0338	25.1284	25.2991	25.1582	25.0442	25.0361	24.6928	25.7611	24.5534	24.6717	25.529	25.5599	26.3176	24.8849	25.5596	25.8883	26.4667	25.3076	25.8966	26.3246	24.6226	24.9558	25.6093	24.9982	26.349
Q9Y6H3	ATP23_HUMAN	Mitochondrial inner membrane protease ATP23 homolog (EC 3.4.24.-) (Ku70-binding protein 3) (XRCC6-binding protein 1)	ATP23 KUB3 XRCC6BP1	2	18.4829	21.2869	19.8454	17.758	17.7989	19.219	17.0751	18.5229	18.6344	19.5163	18.488	18.6521	19.3859	19.3787	18.6293	18.1611	19.3891	20.3396	14.8816	17.7371	18.6638	16.6681	16.8701	17.7736	18.6267	16.8775	18.6696	19.6763	19.9138	17.9276	19.672	17.0997	18.5265	18.772	21.7821	19.1816	16.9853	19.4273	17.3501	17.2291	17.7326	17.707	17.705	19.8112	21.7269
P20648	ATP4A_HUMAN	Potassium-transporting ATPase alpha chain 1 (EC 7.2.2.19) (Gastric H(+)/K(+) ATPase subunit alpha) (Proton pump)	ATP4A	2	31.0371	30.9401	30.1417	30.8207	29.8951	30.91	30.6889	30.2098	30.8851	30.7735	30.1277	30.8228	31.2493	31.6692	30.7703	30.288	29.8598	31.0372	30.0401	30.5403	30.273	29.9962	30.1696	30.8744	30.3451	29.9844	30.282	31.9643	30.9668	30.177	31.3751	31.2944	30.3631	31.494	30.7061	30.8896	30.6331	31.0729	30.4991	31.2844	31.0766	30.4577	30.6672	30.7065	34.4848
O75947	ATP5H_HUMAN	ATP synthase subunit d, mitochondrial (ATPase subunit d) (ATP synthase peripheral stalk subunit d)	ATP5PD ATP5H My032	15	30.2146	32.0643	32.1158	30.9975	31.4909	31.9951	32.4674	31.3785	31.5019	32.1637	31.9853	31.4502	31.2283	31.6929	31.1984	31.7016	30.8858	31.529	31.2808	30.7904	31.1209	30.9842	30.606	32.025	31.043	31.2389	30.1919	31.2265	31.7053	31.03	31.0426	31.5886	32.6296	31.7711	32.3401	30.7112	32.0436	31.6119	31.217	31.7062	31.3154	31.5001	31.5327	31.6711	32.3165
P56385	ATP5I_HUMAN	ATP synthase subunit e, mitochondrial (ATPase subunit e) (ATP synthase membrane subunit e) [Cleaved into: ATP synthase subunit e, mitochondrial, N-terminally processed]	ATP5ME ATP5I ATP5K	7	29.5565	30.6167	30.9692	29.9419	30.221	30.631	31.2394	29.802	31.2256	30.6618	30.3064	30.2365	30.4813	30.0336	29.9325	30.7665	29.8619	30.4752	30.1278	29.8191	30.1513	30.1336	29.5198	31.0892	29.995	30.0034	29.3725	30.1558	30.7313	30.3826	30.2122	30.1201	31.1507	30.8261	31.3553	29.3412	30.4444	30.7232	29.6703	30.7247	30.2361	30.0503	30.3615	30.8457	31.6884
P18859	ATP5J_HUMAN	ATP synthase-coupling factor 6, mitochondrial (ATPase subunit F6) (ATP synthase peripheral stalk subunit F6)	ATP5PF ATP5A ATP5J ATPM	6	28.9905	30.4338	30.6417	29.7292	30.9222	30.451	31.1832	29.5753	29.8641	30.6349	31.2739	31.4538	31.7592	31.4985	31.1679	31.4497	30.8901	31.7048	31.1936	30.9197	31.0353	31.2734	30.4886	31.7959	31.2692	31.1831	30.5284	31.2383	31.9149	31.0437	31.1664	31.1962	31.1293	30.2964	30.9835	29.2659	30.0477	30.7097	29.8401	30.0758	30.0355	29.6454	30.0154	31.9304	33.0102
O75964	ATP5L_HUMAN	ATP synthase subunit g, mitochondrial (ATPase subunit g) (ATP synthase membrane subunit g)	ATP5MG ATP5L	5	28.7767	29.823	30.2549	29.3401	29.5073	29.9248	30.7284	29.2126	30.1714	30.1437	29.6574	29.8654	29.7481	29.678	29.3304	30.0721	29.054	29.6516	29.076	29.4774	29.2733	29.9238	29.0287	30.5877	29.4719	29.2656	28.5985	29.1756	30.2035	29.2407	29.386	29.5328	30.5928	30.1267	30.609	29.0307	30.0765	30.3027	29.3293	30.0859	29.8933	29.4414	29.9308	30.2995	30.4513
Q99766	ATP5S_HUMAN	ATP synthase subunit s, mitochondrial (ATP synthase-coupling factor B) (FB) (Distal membrane arm assembly complex 2-like protein) (Mitochondrial ATP synthase regulatory component factor B)	DMAC2L ATP5S ATPW	7	25.9977	26.8644	26.7035	25.8119	26.1216	26.9656	26.9915	25.7178	26.0695	27.309	26.0135	26.5556	26.316	26.1823	25.661	26.8442	25.713	26.575	25.7341	25.8774	25.3329	26.1211	25.4778	26.3702	25.9553	26.1661	26.8141	26.626	25.8819	26.4118	26.627	26.2726	26.9387	25.7167	26.9214	25.6843	26.7514	26.2043	26.2341	26.3925	26.0994	25.8383	26.4096	26.2571	27.6864
P00846	ATP6_HUMAN	ATP synthase subunit a (F-ATPase protein 6)	MT-ATP6 ATP6 ATPASE6 MTATP6	2	27.5428	28.9538	29.2778	28.1652	28.6605	29.0956	29.1738	27.766	28.8595	28.848	28.4761	28.7616	29.2767	28.9763	28.5185	29.0085	28.2938	28.9024	28.4884	28.4341	28.8265	28.8938	27.9656	29.3818	28.8574	28.6563	28.1453	28.7974	29.2453	28.8652	28.6658	28.4593	29.2965	29.3846	29.3003	27.4678	28.5327	29.0278	27.7831	28.875	28.705	27.827	28.211	29.1875	29.6183
Q04656	ATP7A_HUMAN	Copper-transporting ATPase 1 (EC 7.2.2.8) (Copper pump 1) (Menkes disease-associated protein)	ATP7A MC1 MNK	2	21.7492	22.0736	21.2706	21.3459	20.6982	21.8212	22.0141	22.1297	21.9712	21.9701	20.8952	21.9366	22.2535	21.8621	22.5999	22.5262	21.7466	22.2113	22.024	21.7655	21.6697	21.7018	22.0012	22.0699	21.422	22.1202	22.3051	22.3722	21.5635	21.9752	22.1952	22.2052	22.8799	21.3548	21.4277	20.354	20.9793	21.2197	21.0991	21.2312	21.3431	21.115	21.9272	22.681	21.5722
O75110	ATP9A_HUMAN	Probable phospholipid-transporting ATPase IIA (EC 7.6.2.1) (ATPase class II type 9A)	ATP9A ATPIIA KIAA0611	3	23.2699	23.8986	23.7977	22.9161	23.1637	24.4235	24.1471	24.0971	23.5635	24.1348	23.5167	24.1758	23.8718	23.6963	23.8553	23.3915	23.0276	24.1656	23.3823	23.8249	23.1032	23.9986	23.4875	23.8807	23.215	24.1712	23.6232	24.3689	23.8734	23.3558	23.8857	24.0742	24.4528	24.1331	23.6137	23.8083	23.0731	23.8909	23.9879	23.4923	24.0594	22.4789	24.0662	22.9431	22.7497
P25705	ATPA_HUMAN	ATP synthase subunit alpha, mitochondrial (ATP synthase F1 subunit alpha)	ATP5F1A ATP5A ATP5A1 ATP5AL2 ATPM	46	34.3087	35.895	35.8515	34.584	35.2903	35.8344	36.1679	34.9948	35.4697	35.8565	35.6816	35.3034	35.0279	35.1804	34.9543	35.6778	34.4787	35.2846	34.8321	34.7554	35.025	35.0625	34.6669	35.7881	34.9859	35.054	34.2346	35.2316	35.8039	34.9913	35.1672	35.3099	36.3924	34.2964	36.2565	34.3555	35.4766	35.6858	35.0715	35.6036	35.0407	34.8173	35.3516	35.6237	36.4696
P06576	ATPB_HUMAN	ATP synthase subunit beta, mitochondrial (EC 7.1.2.2) (ATP synthase F1 subunit beta)	ATP5F1B ATP5B ATPMB ATPSB	26	34.3422	36.0695	36.2486	34.5785	35.1977	35.9944	36.4809	35.1939	35.4908	36.183	35.641	35.5915	34.9548	35.1475	35.2624	35.9209	34.7992	35.719	35.2829	34.8949	35.3129	35.1431	34.6517	36.1759	35.2009	35.3743	34.1069	35.2741	35.792	34.9521	35.4047	35.4877	36.665	34.3497	36.5276	34.3127	35.7333	35.7694	35.218	35.8561	35.1047	34.9851	35.6053	35.6832	35.9966
P30049	ATPD_HUMAN	ATP synthase subunit delta, mitochondrial (ATP synthase F1 subunit delta) (F-ATPase delta subunit)	ATP5F1D ATP5D	6	28.345	29.7242	29.9105	28.9796	29.7318	29.8837	30.0973	28.6794	29.3989	29.7121	29.8803	29.4208	29.5094	29.4927	28.989	29.6456	28.6047	29.5234	29.3062	29.032	29.0843	28.9504	28.5049	29.9511	29.3612	29.0211	28.4231	29.4849	29.8798	29.5211	29.3089	29.1783	30.1775	29.0407	29.9365	28.1852	29.4708	30.2182	28.6185	29.5501	29.2331	28.6025	29.1608	30.1412	32.1825
Q5TC12	ATPF1_HUMAN	ATP synthase mitochondrial F1 complex assembly factor 1 (ATP11 homolog)	ATPAF1 ATP11	8	25.6702	26.3127	26.9317	25.8845	26.3211	26.66	27.3031	26.0373	27.1275	27.3995	25.8923	26.085	25.3075	25.5174	25.4452	26.7468	25.9758	26.4978	25.7964	25.6928	25.8975	26.1499	25.4471	26.3346	25.4109	25.9814	25.7343	25.3917	25.9518	25.2833	25.6056	25.8861	27.49	25.7201	26.9848	24.5157	26.4601	26.6975	26.152	26.4216	25.8448	26.0468	25.9791	25.545	25.9748
Q8N5M1	ATPF2_HUMAN	ATP synthase mitochondrial F1 complex assembly factor 2 (ATP12 homolog)	ATPAF2 ATP12 LP3663	10	26.6146	27.8727	27.4763	26.2859	26.8886	27.2625	27.6692	26.2651	27.6397	27.9728	26.2661	26.9331	26.6469	26.6211	25.924	27.2613	26.3209	27.5085	27.6974	26.3834	26.5262	26.2478	26.9639	27.6508	26.3411	26.6824	26.2192	27.2296	27.2515	26.2527	27.5978	26.8905	27.7138	26.1032	27.1974	26.3335	27.1123	26.9335	27.2902	26.7646	26.6976	26.1441	26.7369	29.4506	27.7076
P36542	ATPG_HUMAN	ATP synthase subunit gamma, mitochondrial (ATP synthase F1 subunit gamma) (F-ATPase gamma subunit)	ATP5F1C ATP5C ATP5C1 ATP5CL1	14	30.0338	31.4746	31.612	30.2368	30.3976	31.479	32.0157	30.8139	31.4537	31.4861	31.1313	31.058	30.8115	30.9254	30.7895	31.3901	30.1383	31.0207	30.433	30.6299	30.4377	30.9857	30.425	31.6356	30.7914	30.8256	30.0852	30.8193	31.4342	30.7486	30.6511	30.8069	32.1609	30.6897	32.0791	30.2189	31.2713	31.6044	30.5792	31.4333	30.8973	30.5989	31.1423	31.3464	31.8542
P56134	ATPK_HUMAN	ATP synthase subunit f, mitochondrial (ATP synthase membrane subunit f)	ATP5MF ATP5J2 ATP5JL	3	29.2308	30.8102	31.2869	30.115	29.7489	30.9522	31.6574	30.524	30.5714	31.3831	30.325	30.3098	30.1396	30.5232	30.3321	30.9106	30.0757	30.562	30.627	29.463	30.3596	30.0788	29.4036	31.0335	29.8419	30.5957	28.8941	29.6079	30.2847	29.5833	29.9596	30.6192	32.0622	31.3385	31.7203	29.554	30.9281	30.1358	30.3655	30.6074	30.2544	30.9317	30.666	30.2867	30.5328
Q96IX5	ATPMD_HUMAN	ATP synthase membrane subunit K, mitochondrial (ATP synthase membrane subunit DAPIT, mitochondrial) (Diabetes-associated protein in insulin-sensitive tissues) (HCV F-transactivated protein 2) (Up-regulated during skeletal muscle growth protein 5)	ATP5MK ATP5MD DAPIT HCVFTP2 USMG5 PD04912	4	28.3838	30.1886	30.7295	30.0351	29.7779	30.6269	30.1191	29.3961	30.3633	30.2013	29.9242	30.3489	30.6061	30.4816	30.0421	30.4733	29.8068	30.6032	30.3237	29.5889	29.9947	30.1641	29.4813	30.9133	30.0169	30.0706	29.5161	30.1783	30.7989	29.3705	30.0748	30.0176	30.6165	30.8709	30.6003	29.1897	30.0191	30.264	29.4455	30.0695	30.3975	29.4201	29.6574	30.9967	31.9682
P48047	ATPO_HUMAN	ATP synthase subunit O, mitochondrial (ATP synthase peripheral stalk subunit OSCP) (Oligomycin sensitivity conferral protein) (OSCP)	ATP5PO ATP5O ATPO	12	31.7465	33.2831	33.4308	32.23	32.7824	33.3463	33.8396	32.5859	33.2306	33.2816	32.7302	32.8698	32.5184	32.6891	32.725	33.1811	32.2744	32.9543	32.4674	32.2798	32.6854	32.5996	32.1269	33.4207	32.8227	32.7571	31.7584	32.6957	33.1014	32.573	32.6379	32.6393	34.0491	32.8173	33.8863	31.923	33.1481	33.0766	32.4849	33.1923	32.7849	32.5772	32.933	33.0281	33.8418
Q13535	ATR_HUMAN	Serine/threonine-protein kinase ATR (EC 2.7.11.1) (Ataxia telangiectasia and Rad3-related protein) (FRAP-related protein 1)	ATR FRP1	1	19.2537	17.0944	16.4835	17.1871	17.9632	-0.278166	-0.37337	21.355	24.2133	-0.565216	16.5895	16.0168	17.9175	18.6689	16.8501	0.0508134	17.1586	-0.237612	16.8092	18.1669	16.7703	19.2954	17.1344	-0.0440208	25.7946	-0.301484	18.4819	17.3468	17.7383	18.9907	0.120698	16.2403	16.9981	18.2641	-0.25646	15.9387	16.1208	1.41892	17.2011	17.6865	16.0514	16.0007	16.1765	19.567	18.7304
Q6RW13	ATRAP_HUMAN	Type-1 angiotensin II receptor-associated protein (AT1 receptor-associated protein)	AGTRAP ATRAP	2	27.148	27.1661	26.954	27.3187	26.1997	27.457	27.4296	27.1592	28.0788	26.615	27.1085	27.3339	27.9251	27.5979	27.8156	27.1847	27.0275	27.283	26.957	27.3895	26.8647	27.2422	27.6382	27.4534	27.0691	27.3916	27.5803	28.1965	27.383	27.2113	27.2614	27.4562	27.7656	27.2401	27.0272	26.6836	26.6607	27.2428	27.1249	27.4731	27.3991	26.7903	27.6704	27.2825	28.1509
O75882	ATRN_HUMAN	Attractin (DPPT-L) (Mahogany homolog)	ATRN KIAA0548 MGCA	4	22.3464	23.7426	23.1942	22.7944	23.215	23.4761	23.1944	23.3302	23.3312	23.1398	23.2505	23.2234	23.3132	23.8058	23.1542	22.8901	22.8201	23.5771	23.1132	22.9456	23.2099	22.6154	23.2896	23.867	22.8004	23.0954	23.2814	23.6647	23.5311	22.4423	23.6661	23.2163	23.8566	23.351	23.2343	23.6931	22.9824	23.1238	22.6203	23.1856	22.9299	23.1452	23.2085	24.7004	21.3577
Q9UBB4	ATX10_HUMAN	Ataxin-10 (Brain protein E46 homolog) (Spinocerebellar ataxia type 10 protein)	ATXN10 SCA10	6	24.477	24.2692	24.3186	23.7738	23.1645	24.25	24.1124	24.3016	24.4451	24.3041	23.8367	24.3515	24.8033	24.3072	24.2309	23.9803	24.2595	23.8876	24.1897	24.1755	24.2378	24.9493	24.5598	24.0218	24.4438	24.0803	25.6837	24.8438	23.7855	24.1024	24.4315	24.5602	24.2604	24.6155	24.3705	24.6575	24.3214	24.0628	24.2056	24.2719	23.809	24.5199	24.4503	24.8941	25.7896
Q99700	ATX2_HUMAN	Ataxin-2 (Spinocerebellar ataxia type 2 protein) (Trinucleotide repeat-containing gene 13 protein)	ATXN2 ATX2 SCA2 TNRC13	2	23.7185	24.7057	24.4625	24.0302	24.0962	24.9309	25.0069	24.2657	24.2037	24.7108	23.863	24.1592	23.779	23.7427	24.4055	23.3552	23.7424	23.8153	23.9502	23.561	23.7987	23.3274	23.7573	23.8195	23.8816	24.1245	23.5669	24.6818	23.3563	23.607	23.2759	23.9906	25.1703	23.5001	24.0606	24.2609	24.8497	23.5419	23.9499	24.4348	24.2557	23.6855	24.3943	23.1074	24.1485
Q8WWM7	ATX2L_HUMAN	Ataxin-2-like protein (Ataxin-2 domain protein) (Ataxin-2-related protein)	ATXN2L A2D A2LG A2LP A2RP	2	22.5741	22.5458	22.3271	22.9945	22.1571	22.285	22.2117	22.2136	22.0003	22.756	23.1866	22.099	23.1271	22.807	22.647	22.3945	21.918	22.0651	21.8306	21.2295	22.0972	22.3469	21.5109	21.1741	22.2534	22.3886	22.6879	23.5943	21.0985	22.4751	22.5552	22.432	22.7308	20.3127	22.1918	20.5427	21.9508	21.6085	21.8604	22.6936	21.4553	22.0681	22.2371	23.0461	23.4764
P54252	ATX3_HUMAN	Ataxin-3 (EC 3.4.19.12) (Machado-Joseph disease protein 1) (Spinocerebellar ataxia type 3 protein)	ATXN3 ATX3 MJD MJD1 SCA3	2	19.3009	18.2538	19.9372	18.6396	21.5911	17.2169	18.5086	20.1525	18.8012	18.8596	20.2693	19.5065	19.3536	19.6614	19.572	18.4668	21.8	17.0879	20.718	19.6038	20.4834	20.3381	15.823	17.7158	18.7385	21.1318	21.3282	18.4926	19.8002	20.2521	18.5086	18.5331	18.3169	19.8579	19.0299	21.0863	20.4926	20.3223	20.2602	18.8454	19.059	21.179	18.9294	18.3139	21.6687
Q13825	AUHM_HUMAN	Methylglutaconyl-CoA hydratase, mitochondrial (EC 4.2.1.18) (AU-specific RNA-binding enoyl-CoA hydratase) (AU-binding protein/enoyl-CoA hydratase) (Itaconyl-CoA hydratase) (EC 4.2.1.56)	AUH	7	27.9337	29.1921	29.3299	27.4847	27.7888	29.2328	29.271	27.32	27.6972	29.1732	27.8817	28.2867	27.7825	27.6318	27.7712	28.495	27.5125	28.3723	27.0796	26.7348	27.36	27.1771	26.5715	28.1725	27.6577	27.259	26.3302	29.003	27.8407	27.1381	28.4571	28.4446	29.0648	25.7632	29.0242	27.2064	28.4802	28.634	28.2399	28.3642	28.0844	27.0878	28.3193	27.1614	28.4531
Q9Y679	AUP1_HUMAN	Lipid droplet-regulating VLDL assembly factor AUP1 (Ancient ubiquitous protein 1)	AUP1	8	27.3602	28.0831	27.7536	27.7732	27.4273	28.2635	28.2303	28.1132	28.768	27.7988	27.6297	27.9254	27.5488	27.7149	28.3063	28.1664	27.5712	28.2075	27.1168	27.7996	27.4853	27.9051	28.0465	27.9497	27.7628	28.1221	27.9276	28.1397	27.894	27.6825	27.829	28.1272	28.4838	27.4916	27.7906	27.3796	27.9585	27.7337	26.9414	27.9607	27.6979	27.6787	28.1021	27.6883	27.688
A6NMY6	AXA2L_HUMAN	Putative annexin A2-like protein (Annexin A2 pseudogene 2) (Lipocortin II pseudogene)	ANXA2P2 ANX2L2 ANX2P2 LPC2B	12	32.5924	29.7697	27.74	28.0787	29.5209	27.3584	27.4462	27.9738	27.9958	27.9833	26.3689	30.0781	28.5601	30.441	27.6734	27.6981	26.7232	30.1064	29.0051	29.801	28.0156	28.4017	28.3513	28.3598	27.3018	26.9734	27.9165	28.1526	30.8207	27.3816	28.1518	27.4947	27.4832	33.5952	28.3947	30.5499	31.2563	30.1991	33.4949	27.4737	30.2677	28.0362	27.4297	28.206	30.6967
Q07817	B2CL1_HUMAN	Bcl-2-like protein 1 (Bcl2-L-1) (Apoptosis regulator Bcl-X)	BCL2L1 BCL2L BCLX	2	23.1099	24.4108	24.2837	24.0361	24.0895	24.0766	24.2821	24.1853	25.4966	24.4628	24.2332	24.2477	23.7722	23.5156	24.3046	24.6364	23.9143	24.0167	23.8896	24.2282	24.3215	24.205	24.4767	24.6222	24.1679	24.0663	23.9077	24.7346	24.6087	24.2933	24.1714	24.3375	24.9623	23.883	24.8369	23.4729	23.9981	23.5699	23.6087	24.2111	23.7339	23.8087	23.5094	25.5581	26.2531
Q9BXK5	B2L13_HUMAN	Bcl-2-like protein 13 (Bcl2-L-13) (Bcl-rambo) (Protein Mil1)	BCL2L13 MIL1 CD003	12	26.1404	27.2663	27.634	26.1429	27.1037	27.7789	26.7891	26.6327	27.0072	27.3337	27.0575	26.2203	27.7155	27.1646	26.3405	26.6101	25.7985	26.4235	26.0626	25.6025	25.8484	25.6142	25.7192	26.654	26.1468	25.6084	25.7535	26.8777	27.3198	26.2693	26.4437	26.3913	27.872	25.855	28.0185	26.0071	27.0615	26.7962	26.7405	26.6042	26.1819	26.1052	27.2392	28.4038	27.5876
P61769	B2MG_HUMAN	Beta-2-microglobulin [Cleaved into: Beta-2-microglobulin form pI 5.3]	B2M CDABP0092 HDCMA22P	3	27.3126	28.8086	26.7013	26.223	26.7839	27.2045	27.9723	27.7393	26.378	27.0601	27.0048	27.1306	26.4856	26.586	26.7764	27.0905	26.4408	27.8911	27.1647	27.2115	26.6436	26.4692	27.3515	27.6478	26.3849	25.9702	26.656	27.6188	27.9553	27.6504	26.422	27.1497	28.7042	30.3495	26.6378	27.5525	27.5818	28.2295	27.7579	27.5708	27.9262	26.5589	27.4309	26.4371	29.0785
P04920	B3A2_HUMAN	Anion exchange protein 2 (AE 2) (Anion exchanger 2) (Non-erythroid band 3-like protein) (BND3L) (Solute carrier family 4 member 2)	SLC4A2 AE2 EPB3L1 HKB3 MPB3L	17	26.8924	26.6922	27.6379	26.5586	27.9933	27.6612	27.2792	27.4435	27.9121	27.5846	27.255	27.5993	26.8007	27.5572	26.9566	26.776	27.1448	27.4099	26.7052	27.0761	27.243	26.9549	26.7604	27.6639	27.3709	27.0208	26.5028	27.9212	27.3476	26.5771	27.4567	27.9157	28.1047	26.6262	27.4805	25.9275	26.682	26.639	27.0697	27.6125	27.1835	27.0051	27.3018	28.0878	27.9359
P48751	B3A3_HUMAN	Anion exchange protein 3 (AE 3) (Anion exchanger 3) (CAE3/BAE3) (Cardiac/brain band 3-like protein) (Neuronal band 3-like protein) (Solute carrier family 4 member 3)	SLC4A3 AE3	2	22.8089	22.7857	23.3087	21.8609	22.8223	23.5603	23.1359	23.4958	23.8757	23.2238	22.3418	23.4301	22.3061	22.0633	22.7138	22.6142	22.6628	23.2263	22.3068	22.6725	22.9943	22.832	22.461	23.1003	22.4728	22.3789	22.0607	22.7668	22.2001	22.4896	23.1371	23.5891	23.6955	21.2158	23.2558	22.0666	22.4875	22.0037	22.5766	23.8154	22.4709	22.722	22.9718	23.3113	24.2677
P02730	B3AT_HUMAN	Band 3 anion transport protein (Anion exchange protein 1) (AE 1) (Anion exchanger 1) (Solute carrier family 4 member 1) (CD antigen CD233)	SLC4A1 AE1 DI EPB3	24	29.9882	32.9857	28.3072	27.6254	28.8199	29.0792	28.3877	28.0626	28.3846	29.1345	27.574	28.0255	28.1435	29.3255	27.7107	28.2866	27.8616	28.5808	28.446	28.5534	29.0568	28.1172	28.9771	29.4451	27.9694	27.8398	27.799	28.1517	31.8705	28.4554	28.6913	28.3679	28.7939	28.7504	28.5742	30.6346	28.3977	28.8431	28.9228	28.8539	29.1739	27.4396	28.3069	31.0322	31.332
O94766	B3GA3_HUMAN	Galactosylgalactosylxylosylprotein 3-beta-glucuronosyltransferase 3 (EC 2.4.1.135) (Beta-1,3-glucuronyltransferase 3) (Glucuronosyltransferase I) (GlcAT-I) (UDP-GlcUA:Gal beta-1,3-Gal-R glucuronyltransferase) (GlcUAT-I)	B3GAT3	10	28.2336	29.4511	29.2661	29.0933	28.7261	29.0198	29.6587	30.1035	29.9236	29.1971	29.104	29.1201	29.0668	29.1765	29.7206	29.302	28.8634	29.1153	29.1858	28.7874	29.1848	29.2826	29.9401	29.4698	29.5277	28.9583	29.504	29.293	29.2277	29.245	29.0429	29.3749	29.5992	29.1413	29.1848	29.0228	29.3382	28.9669	28.5062	29.7057	28.9101	29.3889	29.0384	29.4438	29.8474
Q8NCR0	B3GL2_HUMAN	UDP-GalNAc:beta-1,3-N-acetylgalactosaminyltransferase 2 (Beta-1,3-GalNAc-T2) (EC 2.4.1.313) (Beta-1,3-N-acetylgalactosaminyltransferase II)	B3GALNT2	9	24.4254	25.3465	25.3257	25.2842	25.0299	25.6641	25.9735	26.0034	26.5999	25.6458	24.6638	24.9131	25.1543	24.9445	25.6225	25.4426	25.0784	25.3229	25.1539	25.1691	25.2307	25.1922	25.4084	25.795	25.6299	25.4775	25.2936	25.4866	25.0422	24.8315	25.2055	25.2935	26.6593	24.8511	25.8212	25.3301	25.8535	25.143	24.7623	25.5044	24.9669	25.4022	25.5273	25.5459	28.5294
Q6Y288	B3GLT_HUMAN	Beta-1,3-glucosyltransferase (Beta3Glc-T) (EC 2.4.1.-) (Beta 3-glucosyltransferase) (Beta-3-glycosyltransferase-like)	B3GLCT B3GALTL B3GTL	3	21.627	22.6906	21.6283	20.707	22.1132	22.1338	22.1448	22.7718	22.766	22.2082	21.1329	22.8192	22.0965	22.0012	22.8748	23.2947	22.6671	23.0869	22.6921	22.7405	22.3482	22.7188	22.7688	22.6145	21.9708	22.7078	22.3569	22.6697	21.8462	22.2979	22.5175	22.2407	23.2062	22.1489	22.7652	22.8392	23.3667	21.6513	22.0283	22.2808	21.6048	21.5066	22.3575	22.4645	23.1613
Q9NY97	B3GN2_HUMAN	N-acetyllactosaminide beta-1,3-N-acetylglucosaminyltransferase 2 (EC 2.4.1.149) (Beta-1,3-N-acetylglucosaminyltransferase 1) (BGnT-1) (Beta-1,3-Gn-T1) (Beta3Gn-T1) (Beta-1,3-galactosyltransferase 7) (Beta-1,3-GalTase 7) (Beta3Gal-T7) (Beta3GalT7) (b3Gal-T7) (Beta-3-Gx-T7) (UDP-Gal:beta-GlcNAc beta-1,3-galactosyltransferase 7) (UDP-GlcNAc:betaGal beta-1,3-N-acetylglucosaminyltransferase 2) (BGnT-2…	B3GNT2 B3GALT7 B3GNT1	2	20.5811	22.0314	23.0452	22.0156	22.4209	22.7026	23.2158	23.1702	22.1097	23.1248	22.2451	22.6893	21.9619	21.8799	21.9241	22.1227	22.9902	22.2895	22.8571	22.6258	22.8306	22.3496	23.0912	23.5551	22.5553	22.416	21.8677	20.0234	22.2607	22.1776	21.8021	22.3279	23.4059	22.5427	22.7877	22.2768	22.6838	21.8536	21.366	22.936	22.3963	21.8883	22.0296	22.9971	23.2309
Q96L58	B3GT6_HUMAN	Beta-1,3-galactosyltransferase 6 (Beta-1,3-GalTase 6) (Beta3Gal-T6) (Beta3GalT6) (EC 2.4.1.134) (GAG GalTII) (Galactosyltransferase II) (Galactosylxylosylprotein 3-beta-galactosyltransferase) (UDP-Gal:betaGal beta 1,3-galactosyltransferase polypeptide 6)	B3GALT6	6	22.3752	22.99	22.7751	22.5933	22.4961	22.2137	22.9814	23.6478	23.8648	22.178	22.4084	22.7497	22.6156	22.4507	22.6045	22.6127	22.633	22.7868	22.6904	22.6223	23.1447	22.8152	23.4842	22.6841	22.5801	22.6707	23.5797	22.7905	22.7003	23.235	22.4903	22.4805	23.4331	22.9892	22.8537	22.4857	22.9035	23.0987	21.8772	22.9279	22.4479	23.0931	22.9523	23.7553	26.316
O43505	B4GA1_HUMAN	Beta-1,4-glucuronyltransferase 1 (EC 2.4.1.-) (I-beta-1,3-N-acetylglucosaminyltransferase) (iGnT) (N-acetyllactosaminide beta-1,3-N-acetylglucosaminyltransferase) (Poly-N-acetyllactosamine extension enzyme) (UDP-GlcNAc:betaGal beta-1,3-N-acetylglucosaminyltransferase 1)	B4GAT1 B3GNT1 B3GNT6	5	23.2787	24.1539	24.0392	24.128	24.1531	24.3093	25.227	24.4611	24.6455	24.4248	23.8142	24.5017	24.5442	24.5128	24.4595	25.0664	24.2025	24.0102	24.0487	24.5534	24.5793	24.5999	24.9264	24.3331	24.3928	24.5967	24.9296	24.7789	24.4534	24.6619	24.4026	24.4416	24.4591	24.4641	24.7384	24.1863	24.6626	24.1788	23.5893	24.3339	24.3117	24.3366	24.2466	25.0786	26.7035
P15291	B4GT1_HUMAN	Beta-1,4-galactosyltransferase 1 (Beta-1,4-GalTase 1) (Beta4Gal-T1) (b4Gal-T1) (EC 2.4.1.-) (Beta-N-acetylglucosaminyl-glycolipid beta-1,4-galactosyltransferase) (Beta-N-acetylglucosaminylglycopeptide beta-1,4-galactosyltransferase) (EC 2.4.1.38) (Lactose synthase A protein) (EC 2.4.1.22) (N-acetyllactosamine synthase) (EC 2.4.1.90) (Nal synthase) (Neolactotriaosylceramide beta-1,4-galactosyltran…	B4GALT1 GGTB2	7	25.1401	26.685	26.0643	25.3016	25.5137	26.1913	26.4328	26.7636	26.9295	26.7107	25.8983	25.4691	25.5764	25.8835	25.254	25.776	25.505	25.5792	25.3302	25.4636	26.1613	25.0989	26.6643	26.4675	25.9337	25.4018	25.9204	26.2377	25.838	26.674	25.0193	25.6768	27.0827	25.9717	25.9058	25.6319	26.5871	25.6955	25.5271	26.6077	25.8141	26.0405	26.4909	27.02	27.627
O60513	B4GT4_HUMAN	Beta-1,4-galactosyltransferase 4 (Beta-1,4-GalTase 4) (Beta4Gal-T4) (b4Gal-T4) (EC 2.4.1.-) (Beta-N-acetylglucosaminyl-glycolipid beta-1,4-galactosyltransferase) (Lactotriaosylceramide beta-1,4-galactosyltransferase) (EC 2.4.1.275) (N-acetyllactosamine synthase) (EC 2.4.1.90) (Nal synthase) (UDP-Gal:beta-GlcNAc beta-1,4-galactosyltransferase 4) (UDP-galactose:beta-N-acetylglucosamine beta-1,4-gal…	B4GALT4 UNQ552/PRO1109	2	21.5131	22.112	23.2568	23.5659	23.2388	23.1945	22.7743	23.2442	23.4883	23.1848	23.1861	23.3881	23.0507	23.3385	22.8349	21.4018	23.7908	22.8221	23.5437	23.6034	23.9515	23.2767	24.5893	23.7921	22.7658	23.6897	23.4439	22.9627	22.6214	23.8525	22.2185	23.1996	24.2568	23.2547	22.7345	22.3396	23.584	22.599	22.3298	23.2619	22.6896	23.1566	22.3921	23.7401	24.6168
Q9UPM9	B9D1_HUMAN	B9 domain-containing protein 1 (MKS1-related protein 1)	B9D1 MKSR1	1	19.6457	19.2501	18.7063	18.7805	20.0932	19.2034	16.7504	21.2008	20.0824	20.5976	20.2234	19.2639	19.9449	20.2394	17.4224	18.5026	17.7662	18.3846	19.4171	19.1386	17.396	17.0304	17.038	18.7392	19.7884	19.3844	18.7651	20.208	19.2842	16.5646	20.1594	19.0177	21.4617	19.6185	20.4152	22.2493	19.4287	18.8163	17.9995	20.4105	18.7869	22.1512	20.153	19.8191	18.3456
Q9NWV8	BABA1_HUMAN	BRISC and BRCA1-A complex member 1 (Mediator of RAP80 interactions and targeting subunit of 40 kDa) (New component of the BRCA1-A complex)	BABAM1 C19orf62 MERIT40 NBA1 HSPC142	3	24.2614	25.1518	24.4832	24.7642	24.1571	25.2153	24.7003	23.4623	24.3858	24.5628	24.3762	24.7308	24.537	25.15	24.9461	23.3711	24.6167	24.4583	24.2158	24.7677	24.6285	23.7782	24.5245	24.5598	24.569	24.7836	24.4646	25.4447	23.462	23.68	24.2629	24.5569	24.6813	23.7931	23.4157	24.5994	26.0395	24.4987	24.4668	23.8971	24.7079	24.1943	23.0657	23.4122	23.1543
Q9NXR7	BABA2_HUMAN	BRISC and BRCA1-A complex member 2 (BRCA1-A complex subunit BRE) (BRCA1/BRCA2-containing complex subunit 45) (Brain and reproductive organ-expressed protein)	BABAM2 BRCC45 BRE	3	23.497	23.6827	23.1706	23.333	22.9402	23.5612	23.3336	23.7599	23.6457	23.7007	23.4649	23.2925	23.1568	23.7677	23.6582	23.1123	23.6457	22.9568	23.5756	23.3475	23.5632	23.0444	23.7597	23.0409	23.0621	24.0026	23.8134	23.8386	22.3518	23.2062	22.89	23.3985	23.882	23.5681	23.1301	23.8564	24.0961	22.5327	24.1626	23.8652	22.9193	23.9717	23.0735	22.4841	22.7801
Q9H3F6	BACD3_HUMAN	BTB/POZ domain-containing adapter for CUL3-mediated RhoA degradation protein 3 (hBACURD3) (BTB/POZ domain-containing protein KCTD10) (Potassium channel tetramerization domain-containing protein 10)	KCTD10 ULR061 MSTP028	2	21.1702	18.132	18.8686	20.7022	21.6384	18.4418	18.825	20.7625	22.6788	16.7177	20.5815	19.7418	19.7841	19.4866	19.7241	22.2147	20.3591	20.0166	19.9073	20.6781	19.9981	21.0618	20.206	20.2616	20.3953	20.5866	20.6803	20.0352	20.0838	21.0955	20.3297	19.9481	18.3279	20.6493	19.8291	18.1266	14.7885	20.4457	18.9962	18.7251	20.2642	20.7686	19.2683	20.5417	20.09
Q92934	BAD_HUMAN	Bcl2-associated agonist of cell death (BAD) (Bcl-2-binding component 6) (Bcl-2-like protein 8) (Bcl2-L-8) (Bcl-xL/Bcl-2-associated death promoter) (Bcl2 antagonist of cell death)	BAD BBC6 BCL2L8	2	20.8935	22.4037	22.0131	22.1508	23.4476	21.7367	20.5622	21.1631	21.0041	23.1825	23.7315	22.5085	22.0899	21.03	22.3092	23.5045	22.7246	19.2957	22.0756	22.0683	22.259	21.4974	20.5856	21.7971	21.4483	22.0544	20.7247	21.7769	21.6219	21.5735	21.7484	20.895	23.9847	19.2863	21.7449	20.9286	21.6403	20.9932	22.4726	21.9367	20.7058	22.3778	21.2487	23.0651	22.7285
O75531	BAF_HUMAN	Barrier-to-autointegration factor (Breakpoint cluster region protein 1) [Cleaved into: Barrier-to-autointegration factor, N-terminally processed]	BANF1 BAF BCRG1	2	24.7548	23.1323	24.2157	25.166	24.2823	25.0842	24.4544	24.2631	25.4948	24.9177	26.6409	24.2051	25.8479	26.0957	24.3337	23.7607	24.1085	24.6937	25.3978	24.4136	25.6266	23.4659	25.1754	24.9902	26.4999	25.272	23.9799	25.8591	25.417	23.9579	24.7192	25.4376	24.7242	24.9456	26.0836	25.5081	26.4266	25.0019	25.7534	25.3269	24.9575	24.7003	24.5102	24.2816	24.3837
Q99933	BAG1_HUMAN	BAG family molecular chaperone regulator 1 (BAG-1) (Bcl-2-associated athanogene 1)	BAG1 HAP	2	21.2367	20.8232	21.2542	19.8268	21.8021	20.9127	21.3958	19.9387	21.0984	21.6169	22.6367	21.1485	20.8588	21.2419	20.8986	21.774	19.1572	21.085	20.7799	19.3938	20.6818	18.8674	20.1703	21.1611	20.4732	20.9255	19.0337	21.4342	19.8297	20.3801	21.0127	20.943	21.8109	20.8565	19.667	19.6735	20.8518	19.2885	21.7032	20.9674	18.7131	20.9731	21.2349	20.7406	20.235
O95816	BAG2_HUMAN	BAG family molecular chaperone regulator 2 (BAG-2) (Bcl-2-associated athanogene 2)	BAG2	6	25.0284	25.008	23.6851	25.448	24.9417	25.8584	25.8006	25.8773	26.0783	24.9673	24.7233	25.3393	25.4748	25.3075	25.1399	25.5413	25.6974	25.5285	25.3039	25.8154	25.2285	25.6755	25.4713	25.0985	25.5269	25.5617	26.2654	25.4366	25.3674	25.6116	24.8149	25.155	25.8978	26.2385	25.7649	25.5695	25.8274	26.3251	24.6241	25.7686	25.2286	24.896	25.492	25.7894	28.2205
O95817	BAG3_HUMAN	BAG family molecular chaperone regulator 3 (BAG-3) (Bcl-2-associated athanogene 3) (Bcl-2-binding protein Bis) (Docking protein CAIR-1)	BAG3 BIS	13	26.4925	27.374	26.5219	26.7854	27.991	27.1116	27.8265	27.167	27.46	27.3281	28.1242	27.232	26.8586	26.7175	27.3419	27.0148	27.0164	26.972	26.9449	27.1612	27.0095	27.1945	26.7524	27.2786	27.326	27.6062	26.3801	27.2769	26.9415	27.1873	26.6272	26.9324	27.5015	27.33	27.3525	26.8438	27.0722	27.1455	27.1615	27.1734	27.2067	26.9042	26.7429	26.7261	26.4591
Q9UL15	BAG5_HUMAN	BAG family molecular chaperone regulator 5 (BAG-5) (Bcl-2-associated athanogene 5)	BAG5 KIAA0873	11	26.0234	25.7437	26.1393	25.8867	25.9719	26.3069	26.5176	26.1625	26.5031	26.1351	26.0123	26.4228	25.9634	26.3689	26.8254	26.491	26.3525	26.2901	26.2235	26.053	26.1901	26.4438	26.322	26.4833	26.5405	26.7352	26.5882	26.7844	25.6858	25.7495	26.2886	26.4713	26.4345	25.7633	25.8094	26.2247	26.3059	25.4771	26.2381	26.1301	26.2113	26.2133	25.8484	25.9745	26.9846
P46379	BAG6_HUMAN	Large proline-rich protein BAG6 (BAG family molecular chaperone regulator 6) (BCL2-associated athanogene 6) (BAG-6) (HLA-B-associated transcript 3) (Protein G3) (Protein Scythe)	BAG6 BAT3 G3	9	25.1028	25.2091	24.7386	25.2907	25.1294	25.5803	25.6176	26.4907	26.6459	25.072	24.7538	25.3939	25.0178	25.1735	25.5711	25.1636	26.1591	25.2944	25.8125	26.3251	26.0484	27.1644	26.5814	25.4512	25.9772	26.535	26.7788	26.2255	25.3892	26.3319	24.9953	25.3466	25.4072	26.2151	26.044	26.4318	25.8025	24.666	25.6408	25.8963	25.2622	26.2501	25.4919	26.0122	26.9907
Q9UQB8	BAIP2_HUMAN	Brain-specific angiogenesis inhibitor 1-associated protein 2 (BAI-associated protein 2) (BAI1-associated protein 2) (Protein BAP2) (Fas ligand-associated factor 3) (FLAF3) (Insulin receptor substrate p53/p58) (IRS-58) (IRSp53/58) (Insulin receptor substrate protein of 53 kDa) (IRSp53) (Insulin receptor substrate p53)	BAIAP2	15	26.5764	27.0265	26.4088	26.0027	25.8607	26.2362	26.2	24.8711	25.4306	27.1105	26.2595	26.8948	26.4782	26.5503	26.8399	26.3761	25.6533	26.6837	25.2117	25.3147	25.7813	25.4249	24.691	26.1725	25.7097	26.2441	25.7671	27.4562	25.5156	25.8931	27.2895	27.2118	27.1393	24.916	25.9407	24.6784	26.3114	25.8033	26.5634	26.4157	26.1146	25.4105	26.0828	24.9545	27.7521
Q16611	BAK_HUMAN	Bcl-2 homologous antagonist/killer (Apoptosis regulator BAK) (Bcl-2-like protein 7) (Bcl2-L-7)	BAK1 BAK BCL2L7 CDN1	2	18.9748	19.5385	21.0471	20.5692	21.297	20.6993	20.8182	20.2888	21.1857	21.5289	22.2164	22.6168	22.4233	22.7796	22.45	23.165	21.8446	22.936	22.2933	21.4807	22.6606	21.4622	21.569	22.8698	23.6029	21.8749	21.6302	22.4869	22.8432	22.2525	22.3735	21.4693	20.7812	22.3257	21.0783	19.79	20.2483	20.7643	19.0567	18.1565	21.082	20.4412	20.5081	23.1168	22.1588
Q9UHQ4	BAP29_HUMAN	B-cell receptor-associated protein 29 (BCR-associated protein 29) (Bap29)	BCAP29 BAP29	12	27.3589	27.8013	27.5595	27.4671	27.9683	27.7795	28.1265	27.6131	28.2901	27.8801	27.9379	27.5391	27.6905	27.8989	27.5626	27.3028	27.5548	27.7436	27.5455	27.63	27.4763	27.7834	27.8138	27.6713	28.1785	27.6219	28.1763	27.9717	27.7806	27.7735	27.7871	28.0078	28.4517	26.9396	27.3414	27.7028	28.1503	27.9277	27.0721	28.1964	27.8035	27.5114	27.7324	27.375	30.3722
P51572	BAP31_HUMAN	B-cell receptor-associated protein 31 (BCR-associated protein 31) (Bap31) (6C6-AG tumor-associated antigen) (Protein CDM) (p28)	BCAP31 BAP31 DXS1357E	12	29.4634	30.7579	30.059	30.0704	30.2087	30.5327	30.3605	30.093	31.0168	29.9045	29.9222	30.2057	30.1354	30.1042	30.2894	29.8178	29.8557	30.3877	30.1346	30.3035	30.026	30.1652	30.2548	30.234	30.071	30.0748	30.3437	30.8289	30.2853	30.0587	30.1855	30.4316	30.9129	30.6118	29.9474	30.1606	30.1889	30.3684	29.5646	30.2771	30.1716	29.5724	30.0954	30.4372	32.7771
P35613	BASI_HUMAN	Basigin (5F7) (Collagenase stimulatory factor) (Extracellular matrix metalloproteinase inducer) (EMMPRIN) (Hepatoma-associated antigen) (HAb18G) (Leukocyte activation antigen M6) (OK blood group antigen) (Tumor cell-derived collagenase stimulatory factor) (TCSF) (CD antigen CD147)	BSG UNQ6505/PRO21383	19	35.2803	35.1119	34.6338	34.7607	34.0881	35.1784	35.3441	34.6908	35.1349	35.3015	35.1736	34.9746	35.2877	35.587	34.9458	34.6853	34.2199	35.1861	33.758	34.243	34.4499	34.5689	34.5327	35.0109	34.7194	34.3562	34.2876	35.696	34.9312	34.8573	35.4619	35.6915	35.3276	34.4295	35.0151	34.9956	35.1647	35.3594	34.6257	35.5921	35.1841	35.2222	34.9748	34.5624	37.3008
P80723	BASP1_HUMAN	Brain acid soluble protein 1 (22 kDa neuronal tissue-enriched acidic protein) (Neuronal axonal membrane protein NAP-22)	BASP1 NAP22	27	32.0101	30.923	30.9319	30.4598	31.663	31.2072	30.6092	30.3362	31.727	30.6402	31.7277	30.8538	31.3989	31.3353	30.9728	31.1004	29.9973	30.9562	30.1472	30.4068	30.1532	30.5671	29.7926	31.0231	31.3174	30.4167	30.9804	31.5818	30.6856	31.3731	31.5319	31.2178	31.3288	29.7043	30.1909	30.1701	30.7991	31.3602	30.5057	31.6421	31.0044	30.7179	31.0969	31.2881	35.0423
Q07812	BAX_HUMAN	Apoptosis regulator BAX (Bcl-2-like protein 4) (Bcl2-L-4)	BAX BCL2L4	2	22.6399	22.9446	23.5799	22.2382	22.8582	24.6968	24.4893	22.2047	23.2957	23.8873	24.0706	23.2608	23.869	22.8785	23.8309	23.6644	22.9082	22.5988	22.9416	22.5315	23.1786	22.1558	22.4085	22.7961	23.0986	23.2751	22.609	23.7717	23.3797	23.3239	23.6563	23.3893	25.1515	23.9911	22.9481	22.9801	24.7919	22.4852	23.1384	22.8677	23.1397	22.9422	21.9412	22.3273	23.4112
Q9UIG0	BAZ1B_HUMAN	Tyrosine-protein kinase BAZ1B (EC 2.7.10.2) (Bromodomain adjacent to zinc finger domain protein 1B) (Williams syndrome transcription factor) (Williams-Beuren syndrome chromosomal region 10 protein) (Williams-Beuren syndrome chromosomal region 9 protein) (hWALp2)	BAZ1B WBSC10 WBSCR10 WBSCR9 WSTF	2	21.1678	20.8063	20.0275	21.41	19.8064	21.2358	21.7161	20.2151	21.6346	21.3229	19.9346	20.6672	21.314	21.8846	19.9841	21.0038	19.6504	20.5795	19.2301	19.4558	19.8549	20.4323	20.8924	20.703	21.0877	20.5394	19.9779	19.503	20.5392	20.4881	19.2656	20.1803	21.1348	20.9662	20.294	20.2137	20.1939	21.4313	18.8291	20.4059	21.9588	19.9439	20.9061	20.8484	21.4012
Q8NFJ9	BBS1_HUMAN	Bardet-Biedl syndrome 1 protein (BBS2-like protein 2)	BBS1 BBS2L2	7	23.8317	24.2251	24.7782	25.034	24.5197	25.0767	24.7188	25.3965	24.0415	24.2672	24.618	25.4627	24.9873	25.2491	25.4623	24.9955	25.3764	25.1603	25.7994	25.2267	25.1736	24.9655	25.1948	25.3127	25.6528	25.6469	25.5204	25.6901	24.9383	24.7028	25.4405	25.9456	24.7853	25.67	25.1311	25.6985	25.6344	24.4211	24.4176	24.3717	24.3975	25.3951	24.4039	24.9806	27.2808
Q9BXC9	BBS2_HUMAN	Bardet-Biedl syndrome 2 protein	BBS2	4	24.6246	23.7704	24.2606	24.551	24.6087	23.7177	23.973	25.0529	25.1435	23.7636	23.993	22.8887	23.6111	23.9847	23.1421	23.6541	23.6968	22.7704	24.4482	23.5548	22.7538	23.8094	23.3948	22.9062	23.7423	23.7065	24.3159	23.2191	23.1373	24.0954	23.2274	23.1868	23.9263	24.867	24.1034	24.383	23.6991	25.3948	23.5198	24.31	24.2972	24.4991	24.5705	23.8883	29.1763
Q96RK4	BBS4_HUMAN	Bardet-Biedl syndrome 4 protein	BBS4	5	21.4603	22.9148	22.54	23.4563	23.0522	22.5408	23.2133	23.7114	22.5552	23.2654	22.8093	23.02	22.8121	23.2571	22.6198	21.227	23.4504	21.5957	23.9145	22.9384	23.0247	22.2602	22.5417	22.2586	22.7705	22.8746	22.9427	23.5496	21.7502	22.1832	22.7233	23.3524	23.795	23.5369	21.441	22.7549	23.7348	22.275	22.3019	21.9982	22.9713	23.6411	21.8958	22.8144	23.0646
Q8IWZ6	BBS7_HUMAN	Bardet-Biedl syndrome 7 protein (BBS2-like protein 1)	BBS7 BBS2L1	8	23.4649	22.808	22.2435	23.6292	22.8438	22.4583	24.7504	25.0214	24.6911	23.6247	23.9785	23.0053	23.4982	23.6788	22.2604	23.8454	23.8484	22.3143	24.8148	23.9234	23.2813	25.2816	23.4613	23.3024	22.7493	23.8175	24.4577	23.4161	23.1811	24.9086	23.8991	23.3957	22.8714	25.2898	25.9751	24.0947	24.4354	24.1774	24.4321	25.1066	22.6446	25.17	24.9993	24.6508	26.0499
P50895	BCAM_HUMAN	Basal cell adhesion molecule (Auberger B antigen) (B-CAM cell surface glycoprotein) (F8/G253 antigen) (Lutheran antigen) (Lutheran blood group glycoprotein) (CD antigen CD239)	BCAM LU MSK19	9	25.9273	25.0657	25.7384	24.7317	24.8155	25.4046	26.3377	24.4525	25.0293	26.3963	25.7642	26.5466	26.0191	26.8778	25.9604	24.3711	24.6469	25.1926	25.421	25.9368	24.4175	25.0814	25.0931	26.1558	25.695	25.0153	25.1483	27.1185	25.4358	25.5064	26.3373	27.5358	25.9062	24.4292	25.8666	25.4863	25.8444	25.9769	26.5029	25.9537	26.1724	25.4757	25.8484	25.8228	27.281
P56945	BCAR1_HUMAN	Breast cancer anti-estrogen resistance protein 1 (CRK-associated substrate) (Cas scaffolding protein family member 1) (p130cas)	BCAR1 CAS CASS1 CRKAS	2	20.6407	21.6588	19.4133	21.276	21.3004	20.3283	18.9797	20.6765	20.9239	20.7645	21.5756	19.8517	20.6669	20.7379	21.039	19.4492	21.8314	19.731	20.8429	21.2958	21.0321	19.8319	19.4718	19.7995	20.1546	21.4172	20.7042	22.0033	18.9306	20.8599	20.8805	21.0478	21.4622	17.581	20.5836	20.1895	21.6853	19.8027	19.4842	21.6036	17.9391	21.8484	20.3008	18.3015	20.3689
Q9H6U6	BCAS3_HUMAN	Breast carcinoma-amplified sequence 3 (GAOB1)	BCAS3	9	23.8531	23.6491	23.608	24.2496	24.7875	23.8458	24.1409	25.4132	25.6788	23.9147	24.176	23.494	23.3791	23.3331	23.9161	23.763	25.343	23.3997	25.3218	24.7205	24.8914	25.4548	24.581	23.0353	24.1398	25.261	25.8208	23.7749	22.7258	24.5842	23.3658	23.2609	23.8154	24.0394	23.9635	24.7866	24.5056	22.9874	24.3087	24.3617	23.707	25.3343	24.2605	22.7391	23.8402
P54687	BCAT1_HUMAN	Branched-chain-amino-acid aminotransferase, cytosolic (BCAT(c)) (EC 2.6.1.42) (Protein ECA39)	BCAT1 BCT1 ECA39	12	28.9833	29.2069	29.3646	28.1131	27.9551	29.5934	29.2046	27.9982	28.1781	29.2597	29.1258	29.4319	28.6803	28.8965	29.261	28.9718	27.8307	28.8713	28.032	28.334	28.2624	27.8694	28.2245	28.3291	29.1348	29.0177	28.6934	29.9369	26.8237	27.5813	29.3943	29.3368	29.0766	28.2327	28.011	29.2237	29.6351	28.3255	29.6162	30.3787	28.4578	29.3135	29.5059	27.6717	29.0897
O15382	BCAT2_HUMAN	Branched-chain-amino-acid aminotransferase, mitochondrial (BCAT(m)) (EC 2.6.1.42) (Placental protein 18) (PP18)	BCAT2 BCATM BCT2 ECA40	7	23.7159	24.4359	24.8052	23.1473	24.8816	24.401	24.6486	23.2079	23.5749	25.0421	24.2376	23.893	24.228	23.8147	23.6409	23.3774	21.9646	24.6562	23.0687	22.5377	22.8729	23.2366	22.8085	24.499	23.0768	23.3279	22.5739	24.0671	23.907	22.443	24.1802	25.0731	26.024	24.1207	25.3764	22.5303	24.2368	24.1548	24.1521	24.0875	23.3635	23.3452	23.9545	23.2316	25.5476
Q9HAY6	BCDO1_HUMAN	Beta,beta-carotene 15,15'-dioxygenase (EC 1.13.11.63) (Beta-carotene dioxygenase 1) (Beta-carotene oxygenase 1)	BCO1 BCDO BCDO1 BCMO1	19	27.455	27.9359	28.0876	27.7644	28.1439	28.5726	27.8827	28.3396	29.5817	27.9109	27.6678	28.3566	27.3722	27.0087	27.9443	27.8963	28.2551	27.9168	28.4607	28.3933	28.1778	27.819	27.7479	27.5458	28.0361	28.363	28.0321	28.2025	26.3993	28.1133	27.7666	27.9942	28.4624	28.614	27.8562	28.7296	28.8733	27.0649	27.9391	28.7636	27.216	29.4887	28.2004	25.9935	27.6382
Q9BYV7	BCDO2_HUMAN	Beta,beta-carotene 9',10'-oxygenase (EC 1.13.11.71) (B-diox-II) (Beta-carotene dioxygenase 2)	BCO2 BCDO2	5	22.0585	22.5644	22.1503	22.2011	22.1101	20.1322	23.7993	20.7255	20.0878	23.3255	20.8594	22.2998	22.2603	22.1755	21.2538	22.705	19.9155	22.4476	21.9431	21.2298	20.2033	21.87	19.265	21.6078	22.3641	21.7437	19.5913	21.6937	21.5387	20.9277	22.3261	22.2845	22.8908	19.6905	23.9408	21.2746	23.1608	22.0682	22.3741	21.7638	22.3435	21.6153	20.5868	22.535	24.0984
O14874	BCKD_HUMAN	[3-methyl-2-oxobutanoate dehydrogenase [lipoamide]] kinase, mitochondrial (EC 2.7.11.4) (Branched-chain alpha-ketoacid dehydrogenase kinase) (BCKD-kinase) (BCKDHKIN)	BCKDK	6	24.144	25.5081	25.8124	24.7464	24.6407	24.7999	25.9621	25.0142	25.1256	25.6977	24.658	24.9832	25.1277	24.5906	24.3106	25.6275	24.7966	25.209	25.087	24.6839	24.8961	25.1852	24.1362	24.711	24.6409	24.6549	24.3997	24.58	24.8916	24.6249	24.4939	24.6994	25.9374	25.3516	25.696	24.6334	25.3369	25.2802	24.9366	25.0889	24.7281	24.493	24.3938	25.3597	26.2286
Q9NYF8	BCLF1_HUMAN	Bcl-2-associated transcription factor 1 (Btf) (BCLAF1 and THRAP3 family member 1)	BCLAF1 BTF KIAA0164	7	24.8316	25.2828	25.5085	25.0085	24.2764	25.5969	25.1691	25.4265	25.5043	25.557	24.9466	24.6007	25.3874	24.9137	24.3786	24.9428	23.8821	24.6712	23.8584	24.1025	24.4036	24.6466	24.4025	24.5966	25.213	24.596	23.4378	25.3551	24.7255	24.3869	24.9927	25.3521	25.8686	22.2717	24.0651	23.6045	24.9591	24.9283	24.297	25.0103	25.381	24.1504	25.1945	25.4247	25.7027
P11274	BCR_HUMAN	Breakpoint cluster region protein (EC 2.7.11.1) (Renal carcinoma antigen NY-REN-26)	BCR BCR1 D22S11	7	23.7959	24.0532	23.307	24.4742	24.8232	23.9204	25.0033	24.7863	25.5931	24.14	24.097	24.027	23.743	24.0012	24.074	23.8216	24.8872	23.4729	24.9226	25.0172	24.7864	24.9456	24.8008	24.0384	24.818	24.7987	25.1887	24.6184	23.7662	24.8406	23.8605	23.9889	23.7697	24.859	24.4559	24.9587	24.4553	23.8063	24.6653	24.5933	24.4177	24.9376	24.0854	23.8881	24.9951
Q9Y276	BCS1_HUMAN	Mitochondrial chaperone BCS1 (h-BCS1) (BCS1-like protein)	BCS1L BCS1	15	26.8568	28.0126	28.5105	27.548	27.5219	28.2373	28.7094	27.5107	27.7641	28.3596	27.6728	27.5114	27.6564	27.5376	27.4091	28.0926	27.4943	27.8833	27.7128	27.3718	27.66	27.3993	27.0903	28.1188	27.629	27.8054	26.6807	26.9515	27.9978	27.3629	27.2614	27.3814	28.8433	28.2373	28.8257	27.0389	28.2353	27.6713	27.6372	27.8653	27.7892	27.364	27.9754	28.0579	28.8033
Q02338	BDH_HUMAN	D-beta-hydroxybutyrate dehydrogenase, mitochondrial (EC 1.1.1.30) (3-hydroxybutyrate dehydrogenase) (BDH) (Short chain dehydrogenase/reductase family 9C member 1)	BDH1 BDH SDR9C1	11	29.2896	30.1654	30.3364	29.298	29.752	30.6363	30.8039	30.3113	30.6327	30.475	29.7377	30.0759	30.3363	30.5497	29.9533	30.3794	29.6836	30.0952	29.5932	29.6902	29.8403	30.2422	29.427	30.5189	30.1105	30.1192	28.8081	29.9885	30.5235	29.9172	29.8413	30.1547	30.9811	29.8966	30.707	29.5332	30.0377	30.128	29.8705	30.3616	30.0136	29.9568	30.3107	30.4313	31.0304
Q9BUT1	BDH2_HUMAN	3-hydroxybutyrate dehydrogenase type 2 (EC 1.1.1.-) (EC 1.1.1.30) (Dehydrogenase/reductase SDR family member 6) (Oxidoreductase UCPA) (R-beta-hydroxybutyrate dehydrogenase) (Short chain dehydrogenase/reductase family 15C member 1)	BDH2 DHRS6 SDR15C1 UNQ6308/PRO20933	8	27.3161	28.331	28.3448	26.6737	26.6855	27.6636	27.0095	25.8545	26.271	27.366	27.832	28.1995	27.4433	27.6954	28.1707	27.7608	26.7942	27.7898	26.8983	27.7032	26.8639	27.2549	27.2004	27.5548	27.8582	27.0791	27.3016	28.4562	26.6582	26.1263	28.0778	27.8273	27.6296	26.6892	26.6344	27.3261	27.7836	27.1733	27.8246	28.4209	26.5404	26.9363	27.2669	26.7724	29.3461
Q14457	BECN1_HUMAN	Beclin-1 (Coiled-coil myosin-like BCL2-interacting protein) (Protein GT197) [Cleaved into: Beclin-1-C 35 kDa; Beclin-1-C 37 kDa]	BECN1 GT197	3	22.0564	20.8462	20.8891	22.5271	23.041	21.6599	21.9231	22.1302	22.88	21.9243	21.8094	21.9559	22.1628	21.8586	22.0318	20.9989	23.1825	21.3331	22.7674	22.5648	23.216	23.1251	22.7899	21.5616	22.0128	23.1606	23.5719	22.3665	20.9919	22.5685	21.605	21.5141	21.7494	21.095	21.2641	22.5725	22.2116	21.136	21.3078	22.0134	21.6705	22.5911	21.6072	21.1639	23.2016
O76090	BEST1_HUMAN	Bestrophin-1 (TU15B) (Vitelliform macular dystrophy protein 2)	BEST1 VMD2	26	30.3005	31.6851	30.752	30.5625	30.4014	31.4666	31.1366	31.1104	31.3193	31.5258	30.9711	30.9723	30.5229	30.2242	30.3559	30.5914	30.2371	30.615	29.5781	30.1116	30.5128	30.517	30.3097	30.6474	30.771	30.5377	30.0004	30.9871	30.6212	30.4885	30.7694	30.5432	31.8764	30.0344	30.4136	30.0151	31.021	30.9957	30.3621	30.6074	30.5277	30.2341	31.5078	30.4128	31.2911
Q8N1M1	BEST3_HUMAN	Bestrophin-3 (Vitelliform macular dystrophy 2-like protein 3)	BEST3 VMD2L3	2	23.055	22.8153	23.496	24.0423	22.6321	22.4924	22.3621	23.7657	24.6752	22.1354	22.9385	22.9287	23.4906	23.3086	22.86	22.9817	23.1155	22.8628	21.674	23.0178	22.3516	23.2924	23.0461	23.4076	23.3168	23.2397	23.0822	22.8553	23.8149	23.7634	23.0556	22.4561	22.6385	23.6152	23.2413	23.0357	18.6233	24.4844	21.9846	22.1328	23.221	22.6228	23.3976	23.3967	26.5142
O15155	BET1_HUMAN	BET1 homolog (hBET1) (Golgi vesicular membrane-trafficking protein p18)	BET1	2	25.4347	26.4452	26.2527	25.9004	26.3273	26.821	26.1826	26.1255	27.0208	26.1743	25.5663	25.9859	26.4296	26.123	25.8378	26.0799	25.5181	26.0513	25.6748	25.8862	26.0609	26.0154	25.8515	26.1146	26.0131	26.0083	26.1517	26.6938	26.4487	26.4395	25.8673	26.2347	27.0197	25.5787	25.717	25.2566	26.2659	26.8491	25.2212	26.1798	26.2076	25.9796	26.5789	26.5495	27.4222
P16278	BGAL_HUMAN	Beta-galactosidase (EC 3.2.1.23) (Acid beta-galactosidase) (Lactase) (Elastin receptor 1)	GLB1 ELNR1	13	27.9367	28.6281	28.3442	28.1191	28.2432	29.1123	27.9855	28.4167	28.9963	28.6783	28.4437	28.4333	28.1094	28.1982	28.1964	28.8126	27.6046	28.7485	27.5811	28.0952	28.2717	28.0791	29.0101	28.7162	28.0228	27.8186	27.7342	28.8739	28.473	28.1726	28.9714	29.2027	30.1451	27.2531	29.2031	28.0932	29.2202	27.828	28.6695	28.4861	26.9879	27.6993	28.826	29.3404	28.4008
Q15582	BGH3_HUMAN	Transforming growth factor-beta-induced protein ig-h3 (Beta ig-h3) (Kerato-epithelin) (RGD-containing collagen-associated protein) (RGD-CAP)	TGFBI BIGH3	4	23.3008	21.9576	22.2597	23.9205	21.3604	21.0433	21.6942	22.2169	24.0115	21.2851	21.0925	20.793	22.9018	21.9949	21.7165	22.6416	24.0939	24.417	21.6927	23.2352	21.9434	21.2821	21.6085	22.1136	20.748	20.4056	20.74	22.1608	22.5328	21.2694	21.8333	21.7199	21.8693	23.4117	22.7883	21.9557	21.867	24.0321	21.0327	21.6544	21.8678	23.184	21.2034	20.6246	25.0573
P08236	BGLR_HUMAN	Beta-glucuronidase (EC 3.2.1.31) (Beta-G1)	GUSB	12	26.8707	28.6541	27.5255	26.952	27.2895	27.6337	27.8848	28.1597	28.1992	28.228	27.6114	27.3839	26.779	26.6996	27.5303	27.4974	27.2034	27.6797	26.6847	27.1402	27.8125	27.3068	27.9021	27.8073	27.2507	26.9275	26.5573	28.0306	27.1039	26.736	27.8531	28.3551	29.22	26.6667	27.9936	27.443	28.5035	26.9942	27.7684	28.08	26.5803	27.3722	27.6041	27.4022	27.4405
Q9H2M3	BHMT2_HUMAN	S-methylmethionine--homocysteine S-methyltransferase BHMT2 (SMM-hcy methyltransferase) (EC 2.1.1.10) (Betaine--homocysteine S-methyltransferase 2)	BHMT2	1	13.6468	20.6811	19.8868	19.5803	21.4086	18.1828	19.6363	19.7401	15.1937	20.7216	20.3684	19.76	17.1592	19.7914	18.8306	18	20.6784	20.2444	20.5521	18.7287	20.2783	19.9652	20.1576	19.5339	18.9709	20.9374	19.4163	20.3902	17.2942	17.5	17.2748	18.219	20.1887	20.5369	19.2674	19.3018	19.1074	19.5463	17.7739	17.6484	19.466	18.7238	18.6093	18.4205	19.1598
P55061	BI1_HUMAN	Bax inhibitor 1 (BI-1) (Testis-enhanced gene transcript protein) (Transmembrane BAX inhibitor motif-containing protein 6)	TMBIM6 BI1 TEGT	2	21.4424	20.4082	21.675	23.5311	21.914	22.0028	22.8568	23.4678	25.0633	23.1227	20.5249	22.3716	20.942	20.941	23.4662	23.1482	23.4606	23.3794	23.3299	23.5287	22.3498	24.3232	24.2361	22.3814	22.6169	23.2559	23.4576	20.9998	22.6174	23.641	21.4593	21.4247	23.3284	24.589	23.4561	22.6048	24.1815	21.3412	20.4686	22.6163	22.7124	23.9779	21.6781	22.5025	22.5438
P53004	BIEA_HUMAN	Biliverdin reductase A (BVR A) (EC 1.3.1.24) (Biliverdin-IX alpha-reductase)	BLVRA BLVR BVR	3	23.7956	24.1557	23.4839	21.3992	21.8517	23.2802	22.7579	21.9599	22.4165	23.2577	22.9329	23.1538	22.3873	22.5456	23.5528	22.4875	22.0224	22.6512	21.6688	22.3624	22.1496	21.9684	22.3079	22.3614	22.1533	22.3835	21.5546	22.0575	21.3656	21.1304	23.3747	23.1077	23.2752	23.5877	22.5323	23.5732	23.625	22.2432	24.4569	23.9168	21.9655	22.8844	23.5217	21.5076	20.6944
Q9Y6D6	BIG1_HUMAN	Brefeldin A-inhibited guanine nucleotide-exchange protein 1 (Brefeldin A-inhibited GEP 1) (ADP-ribosylation factor guanine nucleotide-exchange factor 1) (p200 ARF guanine nucleotide exchange factor) (p200 ARF-GEP1)	ARFGEF1 ARFGEP1 BIG1	23	27.0177	27.4409	26.6885	26.7774	27.1454	27.0938	27.5422	27.7409	28.5065	27.2529	26.7914	27.0367	26.9079	26.8748	26.9713	27.1831	27.9813	26.6529	27.8342	27.4577	27.6331	27.9974	27.5513	26.6856	26.8276	27.7444	27.8823	27.3454	26.4157	27.3818	27.0554	26.9344	27.3768	27.4243	27.2806	28.067	27.3761	26.3983	26.9826	27.4764	26.9377	28.0005	27.0689	26.4616	29.6847
Q9Y6D5	BIG2_HUMAN	Brefeldin A-inhibited guanine nucleotide-exchange protein 2 (Brefeldin A-inhibited GEP 2) (ADP-ribosylation factor guanine nucleotide-exchange factor 2)	ARFGEF2 ARFGEP2 BIG2	38	27.7644	28.3685	27.8728	27.9415	28.3619	28.1102	28.4362	28.7789	29.4661	28.234	27.9243	28.0441	27.8645	27.7808	27.8801	27.8629	28.9746	27.6795	28.82	28.4689	28.7704	29.065	28.6306	27.5963	28.3759	28.8671	28.8818	28.2792	27.416	28.3818	28.1172	27.877	28.4623	28.2161	28.1321	28.9086	28.2135	27.4323	27.943	28.4665	27.997	28.7934	28.1501	28.2251	30.1471
Q5TH69	BIG3_HUMAN	Brefeldin A-inhibited guanine nucleotide-exchange protein 3 (ARFGEF family member 3)	ARFGEF3 BIG3 C6orf92 KIAA1244	14	22.9236	22.9207	23.0413	24.3474	24.2338	23.3674	23.5375	24.8693	24.8472	22.983	23.4281	23.7193	23.4578	23.4897	23.5169	23.6282	25.2647	22.5952	25.1826	24.7654	24.7315	25.6567	24.529	23.1413	24.583	25.2612	24.9842	23.7223	22.8359	25.1905	22.7854	23.2427	23.0345	23.2128	23.3721	24.9617	23.6033	22.3828	23.3382	23.756	23.2925	24.9016	23.4432	22.0236	24.5038
O00499	BIN1_HUMAN	Myc box-dependent-interacting protein 1 (Amphiphysin II) (Amphiphysin-like protein) (Box-dependent myc-interacting protein 1) (Bridging integrator 1)	BIN1 AMPHL	2	23.5866	23.429	22.3844	22.9311	20.7326	23.1298	22.5898	22.9011	21.4343	22.2862	22.7793	22.886	23.6569	23.7048	23.3291	22.0192	21.876	23.0545	23.2048	22.4693	22.1267	22.2428	22.0022	22.0988	22.3925	23.3904	22.9444	23.9205	22.6479	21.9598	23.0401	23.6941	22.5325	23.8507	23.4766	22.8523	23.9222	22.5078	24.3339	23.7231	22.3473	22.4122	22.9454	23.2437	22.3313
Q9NQY0	BIN3_HUMAN	Bridging integrator 3	BIN3	4	23.8326	24.0594	23.8781	23.1967	22.9585	23.9913	24.0576	24.4161	23.188	23.7023	23.2742	23.8152	23.8534	23.7592	23.7478	23.5826	24.1551	23.9961	24.2034	23.2818	23.7862	24.1894	23.4733	23.444	23.6849	24.3176	24.0428	24.3003	22.7848	23.5441	23.8009	24.0798	23.7461	23.3526	23.4444	23.8508	24.3053	22.7089	24.2067	23.9954	23.3832	24.6147	24.0756	23.5004	24.6003
P11021	BIP_HUMAN	Endoplasmic reticulum chaperone BiP (EC 3.6.4.10) (78 kDa glucose-regulated protein) (GRP-78) (Binding-immunoglobulin protein) (BiP) (Heat shock protein 70 family protein 5) (HSP70 family protein 5) (Heat shock protein family A member 5) (Immunoglobulin heavy chain-binding protein)	HSPA5 GRP78	55	34.6062	35.759	34.8007	34.6471	34.9794	35.6459	35.5683	35.6959	36.03	34.743	34.8824	35.0155	35.0507	34.696	35.0726	35.7151	34.496	35.087	34.4286	35.0297	34.7987	35.5856	34.9523	34.9907	35.0237	35.0759	35.288	35.4429	35.2858	35.4828	35.0223	35.1688	35.733	35.1157	35.2933	34.9005	35.4025	35.6457	34.4199	35.2245	35.1037	34.6367	35.6069	35.365	36.3623
Q9NR09	BIRC6_HUMAN	Baculoviral IAP repeat-containing protein 6 (EC 2.3.2.27) (BIR repeat-containing ubiquitin-conjugating enzyme) (BRUCE) (RING-type E3 ubiquitin transferase BIRC6) (Ubiquitin-conjugating BIR domain enzyme apollon) (APOLLON)	BIRC6 KIAA1289	5	22.4015	22.2693	22.4264	22.0179	24.6557	22.4761	23.2401	22.7721	24.0238	21.6703	24.4223	21.2702	21.5424	21.707	21.2428	21.0676	22.8107	20.804	21.899	22.3226	21.858	22.4155	22.3361	21.0103	21.5652	22.8965	22.9972	21.7619	19.8919	21.2636	20.4943	21.9703	21.6493	22.33	21.3943	24.2228	23.8398	20.5815	23.0093	24.8308	22.365	24.025	21.9602	20.5351	20.4004
P78537	BL1S1_HUMAN	Biogenesis of lysosome-related organelles complex 1 subunit 1 (BLOC-1 subunit 1) (GCN5-like protein 1) (Protein RT14)	BLOC1S1 BLOS1 GCN5L1 RT14	3	25.1074	25.3684	24.5599	24.679	24.8196	25.1868	25.0874	25.4947	25.8595	24.8445	24.4935	24.9442	24.774	24.6793	25.7463	25.0363	25.4636	25.0787	25.3935	24.8267	25.3526	25.425	25.7131	25.0632	24.9353	25.8094	25.4396	25.4067	24.7875	25.0633	25.3646	25.1949	25.869	24.1974	25.3672	24.6137	25.9558	24.9239	25.2142	25.4314	24.5711	25.5105	25.1611	24.9076	25.967
Q6QNY1	BL1S2_HUMAN	Biogenesis of lysosome-related organelles complex 1 subunit 2 (BLOC-1 subunit 2) (Centrosome-associated protein)	BLOC1S2 BLOS2 CEAP	2	24.927	22.8589	23.1808	23.809	24.3347	24.2979	24.5248	23.6188	23.4276	24.5542	24.3856	24.2329	23.5776	23.3911	24.8831	24.2193	21.6057	24.1705	23.9047	23.7671	23.789	23.6468	23.6992	24.9507	24.3857	24.4569	23.8656	25.5806	24.0475	23.8115	24.4	20.4954	25.0774	23.9384	24.6187	22.603	23.3254	24.2832	24.7573	24.7375	24.4219	24.0895	24.3095	23.7194	24.2371
Q6QNY0	BL1S3_HUMAN	Biogenesis of lysosome-related organelles complex 1 subunit 3 (BLOC-1 subunit 3)	BLOC1S3 BLOS3	1	19.986	18.6213	18.4588	18.7281	18.7054	19.2237	19.0216	18.7351	18.1365	19.0768	19.2967	18.6962	19.8084	16.4991	19.0106	15.7589	19.3295	18.5508	19.6309	19.2119	18.5942	19.0754	18.4579	18.0413	17.8926	19.248	19.1771	20.709	16.4557	0.936853	19.6215	18.8433	20.1604	19.6971	17.3618	19.7879	18.931	1.41892	19.4985	16.6636	18.7293	18.5772	19.3596	19.5549	20.4651
P54132	BLM_HUMAN	Bloom syndrome protein (EC 3.6.4.12) (DNA helicase, RecQ-like type 2) (RecQ2) (RecQ protein-like 3)	BLM RECQ2 RECQL3	2	23.4905	23.1109	22.7099	22.6432	25.215	23.0644	22.8583	23.5329	23.3293	22.3274	24.2583	22.6855	23.8915	24.7445	23.219	23.4899	22.7641	23.2252	23.1375	23.0527	23.4534	22.7371	23.056	24.1226	24.0315	23.4059	23.6598	22.512	24.2895	24.9937	23.5608	23.5988	23.5917	23.1946	21.658	23.0743	23.6244	24.3788	22.5232	23.0303	23.6648	24.3663	23.5985	23.5041	24.5009
Q13867	BLMH_HUMAN	Bleomycin hydrolase (BH) (BLM hydrolase) (BMH) (EC 3.4.22.40)	BLMH	3	24.2041	24.3447	25.2349	23.5965	23.5333	24.0153	24.502	23.9986	24.0905	23.9742	23.9586	23.4047	23.4816	23.709	23.0683	22.1529	22.841	23.3704	23.097	23.2716	22.2975	22.3422	21.8551	23.2702	22.7795	23.0872	24.4386	23.6908	23.5994	23.3048	23.5728	23.3315	23.7476	24.0095	23.4232	24.1383	23.1518	23.6896	24.5278	24.7738	24.0828	22.8505	23.349	23.6796	24.4472
P30043	BLVRB_HUMAN	Flavin reductase (NADPH) (FR) (EC 1.5.1.30) (Biliverdin reductase B) (BVR-B) (EC 1.3.1.24) (Biliverdin-IX beta-reductase) (Green heme-binding protein) (GHBP) (NADPH-dependent diaphorase) (NADPH-flavin reductase) (FLR)	BLVRB FLR	7	28.5826	29.3846	26.7162	26.1066	26.688	26.8056	26.3582	26.2482	26.1011	26.9425	26.925	27.1358	26.2014	27.2462	27.1184	26.3811	26.464	27.0608	25.895	26.4448	26.6205	26.4934	26.593	27.1989	26.8146	26.4319	27.0941	26.9877	26.8152	25.6162	27.4053	27.2075	27.1485	27.1076	26.0929	28.0581	27.296	26.669	28.2055	27.6204	25.8083	26.3185	26.8322	26.336	26.7077
P12645	BMP3_HUMAN	Bone morphogenetic protein 3 (BMP-3) (Bone morphogenetic protein 3A) (BMP-3A) (Osteogenin)	BMP3 BMP3A	2	17.2287	0.86056	17.6862	21.4092	18.7111	0.721834	16.9561	16.3453	15.9113	0.434784	16.7566	14.8699	19.1263	15.2883	16.7431	15.2681	22.5441	21.7265	16.0252	21.4085	17.1745	15.9013	16.6038	17.3113	17.6009	0.698516	14.4934	17.1521	19.0107	14.218	14.6174	0.679338	16.5786	16.0924	0.74354	18.3201	16.2184	21.029	0.0559207	0.460173	0.948039	17.9607	0.536108	16.2736	19.8682
P22003	BMP5_HUMAN	Bone morphogenetic protein 5 (BMP-5)	BMP5	2	23.1565	22.2237	22.5749	22.0466	23.0564	22.911	23.0023	23.8502	23.3011	22.0295	22.7761	23.4225	23.2955	22.7807	23.0576	23.6149	23.5479	24.3705	23.0455	23.8537	24.0316	23.8825	23.5954	24.0293	23.3009	23.2385	23.2476	23.0823	23.5212	22.4393	23.9487	23.3608	23.4262	23.0858	22.5121	22.203	21.347	23.1155	22.3788	22.604	21.9601	22.0204	23.2616	23.9037	20.8455
P18075	BMP7_HUMAN	Bone morphogenetic protein 7 (BMP-7) (Osteogenic protein 1) (OP-1) (Eptotermin alfa)	BMP7 OP1	8	26.4201	27.8028	27.2179	26.4604	27.2168	27.6712	27.4997	27.7336	27.884	26.9186	26.8576	27.0308	26.6489	26.4706	26.4198	26.951	26.6725	27.4716	26.6382	27.4005	27.42	27.1005	27.0531	27.4826	26.8793	26.8282	26.9529	27.2936	27.0389	26.174	27.1301	27.1909	28.3728	27.2382	26.8972	26.5652	27.0746	27.0802	26.7726	27.2872	26.7604	26.5871	27.4474	27.3289	27.5856
Q14692	BMS1_HUMAN	Ribosome biogenesis protein BMS1 homolog (Ribosome assembly protein BMS1 homolog)	BMS1 BMS1L KIAA0187	2	20.5289	19.6845	19.4062	22.3312	19.4731	19.308	20.9083	21.5855	22.7053	20.7536	20.2334	20.9282	21.504	21.2858	20.4789	20.9313	21.9983	20.8317	21.0144	21.1253	21.6409	22.0571	21.1311	20.9085	21.1611	21.7485	21.3744	20.7209	20.3614	21.8588	19.1152	20.9438	21.3577	20.669	20.4988	21.1691	21.1281	19.8936	18.2872	18.7238	22.4504	20.9833	20.1506	21.6296	22.3833
O60238	BNI3L_HUMAN	BCL2/adenovirus E1B 19 kDa protein-interacting protein 3-like (Adenovirus E1B19K-binding protein B5) (BCL2/adenovirus E1B 19 kDa protein-interacting protein 3A) (NIP3-like protein X) (NIP3L)	BNIP3L BNIP3A BNIP3H NIX	3	22.0231	23.1446	23.4635	23.0041	23.0074	23.4391	23.6819	22.1137	22.871	23.342	23.4079	22.6437	23.5851	22.7765	22.7491	23.2891	22.3969	23.1897	22.8162	22.5359	22.5788	23.1981	22.5319	23.208	22.6858	22.9592	22.4667	23.5721	23.2947	22.9372	22.1063	21.9502	23.2948	21.0713	22.3351	21.2625	22.9024	23.8845	22.4074	22.0847	22.5737	22.3341	22.9541	23.861	24.729
Q12982	BNIP2_HUMAN	BCL2/adenovirus E1B 19 kDa protein-interacting protein 2	BNIP2 NIP2	2	22.997	24.3733	24.1079	23.7232	23.3158	24.318	24.8769	24.4069	25.015	24.3263	23.2429	23.3845	23.2136	23.1065	23.9691	23.436	23.9413	23.4244	23.2184	23.8206	23.7833	23.584	23.6484	24.0513	23.3441	23.3983	23.4385	22.35	23.3509	23.2652	23.3867	23.7396	24.6612	23.0302	24.0799	24.1307	24.5913	22.991	23.6008	24.2116	23.8641	23.8298	24.1509	23.1166	22.0793
Q12983	BNIP3_HUMAN	BCL2/adenovirus E1B 19 kDa protein-interacting protein 3	BNIP3 NIP3	2	20.9816	21.4834	22.0112	21.219	21.6307	21.5158	21.5724	20.7859	22.08	22.0177	21.8133	21.0689	22.3313	21.9717	21.0841	21.7537	21.0292	21.0765	20.9006	21.1911	20.9157	21.668	20.4753	21.3808	20.9234	21.7418	21.1086	21.5263	21.9765	21.2254	21.2229	20.5215	21.1804	20.214	21.5978	19.537	21.4051	22.4618	20.8329	20.8307	21.5818	21.4124	21.294	21.7765	22.6575
Q9UMX3	BOK_HUMAN	Bcl-2-related ovarian killer protein (hBOK) (Bcl-2-like protein 9) (Bcl2-L-9)	BOK BCL2L9	8	27.4463	28.3439	28.2086	27.3847	27.8906	28.1318	28.3321	28.2573	28.6858	27.9555	27.6357	27.8559	27.7357	27.3969	28.0308	28.6012	27.5393	27.9759	27.5249	27.5942	27.9357	28.0807	28.0503	28.2976	28.2697	27.7848	27.9714	28.1931	28.0437	27.9251	28.0993	27.8058	28.7096	27.7695	28.1286	27.8105	28.0526	27.9239	27.6404	28.02	27.7636	27.5459	28.1606	28.2914	30.284
Q9H3K6	BOLA2_HUMAN	BolA-like protein 2	BOLA2 BOLA2A My016; BOLA2B	2	22.7143	23.5947	23.0474	22.6175	22.7625	23.6624	23.6088	21.9483	21.3583	23.1409	23.4414	22.6983	22.8628	22.4657	23.2139	22.6538	23.2547	22.6002	22.4251	22.808	22.5973	22.854	22.8645	22.7696	22.683	22.1491	23.3123	23.5533	22.4309	22.145	22.9324	23.2128	23.3183	23.2731	23.3339	23.4597	23.305	22.3199	23.3906	23.3388	22.7652	22.1569	23.1325	22.2162	22.8615
Q53S33	BOLA3_HUMAN	BolA-like protein 3	BOLA3	2	21.9587	23.8778	23.7537	20.5306	23.4917	23.4716	22.8444	21.1954	20.751	23.9438	23.3703	22.547	21.7507	21.3006	20.9348	23.2576	20.1983	22.8109	21.423	20.7403	20.7169	19.9546	20.7536	22.4446	21.3418	21.1646	20.3518	22.2944	21.5798	20.5905	22.2183	22.4455	23.839	19.8841	23.4576	20.1104	21.9933	23.8789	22.5853	22.8698	21.8003	21.2089	22.5253	21.6024	22.871
Q969J3	BORC5_HUMAN	BLOC-1-related complex subunit 5 (Loss of heterozygosity 12 chromosomal region 1) (Myristoylated lysosomal protein) (Myrlysin)	BORCS5 LOH12CR1	2	24.0843	24.3625	23.7349	23.3595	23.222	24.5234	24.5221	23.6444	23.4367	24.0485	23.1618	24.0012	23.4003	23.2081	24.271	24.1833	22.7878	24.2324	23.0051	23.8322	23.775	23.5357	23.8783	24.3225	24.0374	24.1178	23.2257	24.6306	23.8754	23.7019	24.2032	24.4641	24.8914	22.8768	24.1397	23.1005	24.8856	23.8803	23.8198	24.6956	23.8248	23.1805	23.8115	24.0826	25.3327
Q96GS4	BORC6_HUMAN	BLOC-1-related complex subunit 6 (Lysosome-dispersing protein) (Lyspersin)	BORCS6 C17orf59	8	25.4086	25.0737	24.8412	24.4	24.5779	25.2912	25.3685	24.3924	23.971	25.3078	25.1542	24.9098	25.0516	24.3458	26.0019	25.7527	23.0701	25.4255	23.6224	24.1381	24.7306	24.0622	24.3733	25.674	25.4069	25.0951	24.3124	26.0334	25.6036	25.5445	25.6412	25.9527	26.1795	23.1409	25.1869	22.4779	25.2136	25.3637	24.7213	24.7503	25.1148	24.074	24.6957	25.4221	26.6801
Q96B45	BORC7_HUMAN	BLOC-1-related complex subunit 7 (Diaskedin)	BORCS7 C10orf32	2	23.3076	23.2756	22.9548	22.0622	23.38	22.9144	23.3225	22.1582	23.1124	23.1427	23.1518	22.8171	22.572	21.1436	23.5478	23.412	21.4601	23.0008	22.0647	22.6043	22.483	22.1718	22.4859	23.4536	23.1109	23.0099	21.9734	24.0342	23.2925	23.8175	23.3168	23.6897	23.7466	21.3211	22.9984	20.8087	23.3781	22.8596	22.9422	24.4894	22.8166	21.8601	22.7863	23.2408	24.5754
Q96FH0	BORC8_HUMAN	BLOC-1-related complex subunit 8 (MEF2B neighbor)	BORCS8 MEF2BNB	2	22.0538	22.0745	21.6796	21.1688	21.6965	22.0486	22.6495	21.9753	22.3415	21.9568	21.7744	21.73	21.3707	21.0668	22.1772	22.2483	21.0264	22.0103	20.6186	21.1774	21.6593	21.154	21.3664	22.4183	22.4002	21.8331	21.0187	22.465	22.1675	22.5953	22.6691	22.5608	23.1346	20.6719	22.1056	21.1173	22.529	22.2228	21.6598	22.4355	22.2296	21.2713	22.4482	22.153	23.6713
Q9H3Q1	BORG4_HUMAN	Cdc42 effector protein 4 (Binder of Rho GTPases 4)	CDC42EP4 BORG4 CEP4	3	23.3535	21.9048	21.5963	22.6603	24.2324	21.1919	22.0526	22.5173	23.1936	22.2636	22.8491	22.2279	22.8034	23.1932	22.3861	22.7141	23.7896	21.0873	23.5172	23.1382	22.2593	23.0796	22.2077	20.8217	22.7654	23.119	23.3497	21.941	22.8814	24.1403	22.2285	22.2889	21.3905	22.3582	23.0753	21.9937	22.5978	22.0337	23.3607	21.9636	21.359	23.3998	21.5402	22.5676	24.2266
Q86WA6	BPHL_HUMAN	Valacyclovir hydrolase (VACVase) (Valacyclovirase) (EC 3.1.-.-) (Biphenyl hydrolase-like protein) (Biphenyl hydrolase-related protein) (Bph-rp) (Breast epithelial mucin-associated antigen) (MCNAA)	BPHL MCNAA	3	24.8388	25.1315	25.4545	24.4117	25.2037	24.8468	25.2966	24.1055	26.9159	23.9156	24.2152	24.9983	24.7235	24.4123	24.4282	25.275	23.8911	25.7358	24.0057	23.9496	24.0577	23.8507	23.8789	24.2242	24.4099	23.6517	24.2986	24.9871	24.8922	24.8568	24.8134	24.9351	25.0925	24.2048	25.2414	23.7904	24.9359	25.5791	24.7882	24.88	24.4457	24.0977	24.8334	24.8541	27.997
P17213	BPI_HUMAN	Bactericidal permeability-increasing protein (BPI) (CAP 57)	BPI	1	19.6625	20.7873	17.314	0.240157	15.6064	-0.278166	16.7781	-0.29238	1.3194	15.4982	-0.0189976	-0.441031	15.7985	16.2202	15.8158	16.6312	-0.651718	17.3861	18.1925	-0.0626378	-0.472602	0.0344352	-0.392884	19.6017	0.246775	-0.301484	0.491701	17.2578	18.4436	0.936853	15.8879	-0.320662	-0.305701	0.821812	-0.25646	19.0448	16.4341	1.41892	19.7604	-0.539827	17.8128	0.0776293	-0.463892	23.4893	4.20668
Q9NP55	BPIA1_HUMAN	BPI fold-containing family A member 1 (Lung-specific protein X) (Nasopharyngeal carcinoma-related protein) (Palate lung and nasal epithelium clone protein) (Secretory protein in upper respiratory tracts) (Short PLUNC1) (SPLUNC1) (Tracheal epithelium-enriched protein) (Von Ebner protein Hl)	BPIFA1 LUNX NASG PLUNC SPLUNC1 SPURT UNQ787/PRO1606	2	17.64	17.3918	15.9429	21.6853	1.55303	0.721834	0.62663	0.70762	2.3194	0.434784	16.4995	0.558969	21.3956	17.7488	0.686164	15.782	19.237	20.9499	17.3971	21.3127	17.1339	18.1253	16.0212	16.9344	18.5398	16.7124	17.8642	19.2965	2.04791	1.93685	1.1207	16.1046	18.7435	15.7859	19.9137	20.9797	0.362166	20.6829	0.0559207	20.1095	0.948039	18.1704	0.536108	18.5489	21.5564
P50747	BPL1_HUMAN	Biotin--protein ligase (EC 6.3.4.-) (Biotin apo-protein ligase) [Includes: Biotin--[methylmalonyl-CoA-carboxytransferase] ligase (EC 6.3.4.9); Biotin--[propionyl-CoA-carboxylase [ATP-hydrolyzing]] ligase (EC 6.3.4.10) (Holocarboxylase synthetase) (HCS); Biotin--[methylcrotonoyl-CoA-carboxylase] ligase (EC 6.3.4.11); Biotin--[acetyl-CoA-carboxylase] ligase (EC 6.3.4.15)]	HLCS	6	25.164	25.8281	24.9284	25.6	24.4371	25.399	24.761	24.7977	24.9876	24.8616	24.759	25.011	25.8702	25.161	25.2751	25.0919	25.5691	24.6679	24.935	24.8906	25.2911	25.3487	24.5903	24.4866	25.17	25.1797	26.0222	25.1794	23.7748	25.3894	25.2295	24.5566	25.4894	24.1209	24.1791	25.0967	24.4859	25.1564	24.9396	25.4944	24.9523	24.8063	25.3399	23.9625	26.0525
O95861	BPNT1_HUMAN	3'(2'),5'-bisphosphate nucleotidase 1 (EC 3.1.3.7) (Bisphosphate 3'-nucleotidase 1) (PAP-inositol 1,4-phosphatase) (PIP)	BPNT1	3	24.3009	24.6302	24.2368	22.7742	22.6863	24.3757	23.8321	22.9961	22.8379	24.3311	24.106	23.919	23.9872	23.5731	24.0954	23.6104	22.7489	23.67	22.8789	22.9108	22.8677	22.5831	23.1991	23.1055	23.24	23.475	23.1424	24.175	22.3129	21.8468	23.9089	24.0686	24.5117	23.1586	24.0667	24.3169	24.6005	23.2667	24.6704	24.7332	22.9119	24.0921	24.0002	22.8258	24.3819
P15056	BRAF_HUMAN	Serine/threonine-protein kinase B-raf (EC 2.7.11.1) (Proto-oncogene B-Raf) (p94) (v-Raf murine sarcoma viral oncogene homolog B1)	BRAF BRAF1 RAFB1	4	22.5442	23.0118	23.3468	23.2475	23.8345	23.4122	24.2967	24.2642	24.4132	23.2963	23.7165	23.1748	23.6423	23.1864	23.0396	23.3281	24.3398	22.5179	24.2851	24.1032	24.0966	23.9354	23.5786	23.8743	23.4945	24.4428	24.6873	22.8442	23.3217	24.1508	23.0679	22.6894	23.6733	23.7413	24.3146	24.152	23.7978	22.6087	22.9296	23.7299	23.2295	23.9653	23.0787	25.2002	23.9484
Q6PJG6	BRAT1_HUMAN	BRCA1-associated ATM activator 1 (BRCA1-associated protein required for ATM activation protein 1)	BRAT1 BAAT1 C7orf27	4	21.7269	21.4959	21.6106	22.7315	22.0058	21.312	21.724	22.4816	24.2543	22.6688	21.7687	22.1938	20.5943	20.6369	21.7811	20.8046	21.9572	21.5552	22.2087	21.7591	22.1425	22.2001	22.1812	22.2493	22.0731	22.446	21.8714	21.7155	21.2556	21.8504	21.0608	20.9305	21.4885	22.7018	21.9211	22.0605	22.5706	23.4576	20.7313	21.6716	22.1151	23.0519	21.303	21.5041	23.3234
O95415	BRI3_HUMAN	Brain protein I3 (pRGR2)	BRI3	2	25.9312	25.9801	25.7504	26.4387	25.8873	25.9582	26.0879	26.2148	27.4012	25.7057	25.5559	25.8483	26.3493	26.3047	26.2281	26.0086	25.8518	26.0448	26.0683	26.2052	25.978	26.5027	25.9332	26.3011	26.2389	26.15	26.54	26.7263	26.4462	26.6531	26.107	26.2522	26.6406	26.9049	26.1836	25.8472	26.1366	26.7326	25.4837	26.1501	26.1126	26.1353	25.8885	25.9233	27.9465
Q8WY22	BRI3B_HUMAN	BRI3-binding protein (I3-binding protein) (Cervical cancer 1 proto-oncogene-binding protein KG19) (HCCRBP-1)	BRI3BP KG19	3	27.2123	27.9352	27.771	27.2158	27.1926	28.1411	28.0959	27.7731	28.1105	27.6955	26.7267	27.6683	27.8446	27.2864	27.3574	27.4873	27.0392	27.6178	27.1773	27.4837	27.3908	27.7789	27.4437	27.3407	27.7288	27.9744	27.5947	27.6812	27.5131	27.3897	27.5949	27.6935	28.3441	27.6804	27.6068	27.4364	27.98	27.8722	27.5184	27.4156	27.5643	26.8121	27.7679	27.6661	29.565
Q5VW32	BROX_HUMAN	BRO1 domain-containing protein BROX (BRO1 domain- and CAAX motif-containing protein)	BROX BROFTI C1orf58	5	24.5227	24.7632	24.0954	24.4633	23.9008	24.6913	24.0852	24.197	24.2354	24.0193	23.9616	24.5838	25.0676	25.0015	25.0113	24.2368	24.6548	24.9128	24.261	24.527	24.257	24.5712	24.4485	24.3887	24.7671	24.4131	25.2163	25.2634	24.8456	25.037	24.7725	24.4952	24.3324	24.6667	23.8382	24.2291	24.6469	24.9716	24.5847	24.7861	24.114	24.2582	24.333	24.2659	25.8769
Q8TDN6	BRX1_HUMAN	Ribosome biogenesis protein BRX1 homolog (Brix domain-containing protein 2)	BRIX1 BRIX BXDC2	4	24.5167	24.3101	24.6297	25.0079	23.8976	24.4583	25.0276	24.6776	25.8546	24.8016	23.8711	23.8424	24.5355	24.348	24.2265	25.1383	24.3308	24.4258	24.4944	24.3353	24.7327	24.4403	24.2552	24.0483	24.302	24.7982	24.0396	23.9289	23.5535	23.8445	24.0374	24.6124	25.7029	24.4788	24.6299	24.9768	24.6897	23.6657	24.2875	24.2629	24.9438	24.5476	24.5591	23.9232	21.4057
Q96G97	BSCL2_HUMAN	Seipin (Bernardinelli-Seip congenital lipodystrophy type 2 protein)	BSCL2	2	22.1704	22.7979	23.1358	23.0323	22.9674	23.004	23.3696	23.5924	24.566	22.6957	22.8153	22.3345	23.1698	22.5139	22.396	23.1795	23.0411	22.9928	22.9386	23.4555	22.7991	23.4602	22.8989	22.7772	22.9719	22.995	23.5464	23.0174	23.4442	23.2904	22.5164	22.581	23.7067	23.6434	23.2332	22.7563	23.0982	23.0092	22.2051	22.8273	22.8616	22.1973	22.6325	23.7432	21.4332
Q5W0U4	BSPRY_HUMAN	B box and SPRY domain-containing protein	BSPRY	7	24.5666	25.4822	25.1034	24.6772	24.8113	25.389	25.672	25.2369	25.791	24.8106	24.9248	24.9854	25.5232	23.6588	25.3613	25.7841	23.0785	25.0346	24.7907	24.6843	24.6611	25.865	25.581	24.2785	25.385	25.0388	24.3751	25.8294	25.3525	26.0191	26.0622	24.6266	25.0468	24.4942	25.6022	23.7079	25.6634	25.4179	24.239	24.2612	25.6677	25.069	25.3956	24.0103	27.2352
Q10588	BST1_HUMAN	ADP-ribosyl cyclase/cyclic ADP-ribose hydrolase 2 (EC 3.2.2.6) (ADP-ribosyl cyclase 2) (Bone marrow stromal antigen 1) (BST-1) (Cyclic ADP-ribose hydrolase 2) (cADPr hydrolase 2) (CD antigen CD157)	BST1	4	24.3812	20.9408	18.9613	18.756	21.509	19.9441	18.5452	20.1235	15.4202	19.9053	18.1461	21.0767	19.6483	22.3487	19.2364	18.7097	18.5493	18.184	19.1729	19.6335	18.8243	20.3088	20.2587	19.5186	16.0902	17.9162	19.4828	19.2379	21.4623	19.4166	19.5924	19.5125	18.2248	23.3121	19.8786	21.9714	23.4092	21.2467	25.4758	19.8244	20.6909	21.3117	19.7245	20.9743	22.2771
Q10589	BST2_HUMAN	Bone marrow stromal antigen 2 (BST-2) (HM1.24 antigen) (Tetherin) (CD antigen CD317)	BST2	3	26.1063	26.235	25.4148	25.8211	26.2797	25.7245	25.6462	25.6411	26.2907	25.2011	25.9954	25.1501	25.7761	25.5022	25.2108	25.0048	25.3995	25.8393	24.9422	25.3302	24.7848	25.0215	24.2658	24.9167	24.8527	24.7804	25.0093	26.0738	25.5418	26.0118	25.0105	25.0912	26.3966	27.459	25.6326	25.9447	25.6789	26.8369	25.5561	25.9992	25.7188	25.6269	25.7404	25.5441	28.1606
Q7KYR7	BT2A1_HUMAN	Butyrophilin subfamily 2 member A1	BTN2A1 BT2.1 BTF1	7	23.6831	24.8149	23.228	23.4283	23.0032	23.5407	24.1896	23.4493	23.5495	24.6222	23.5081	24.2213	23.2337	24.4095	23.7595	23.9999	23.6443	23.8571	22.3735	22.892	23.7158	23.6793	23.3515	24.0789	23.4206	22.96	23.5416	24.2182	24.2457	24.1092	23.9741	24.7029	24.3434	23.4141	24.4559	24.8785	24.8683	23.6063	24.1936	24.3077	24.1434	24.2382	23.6542	22.7508	25.9688
O00481	BT3A1_HUMAN	Butyrophilin subfamily 3 member A1 (CD antigen CD277)	BTN3A1 BTF5	2	16.677	18.8544	0.696136	17.9687	19.1013	16.8202	18.2808	19.2331	17.8873	17.5852	16.3723	17.7804	17.5065	18.4909	18.2468	18.4673	19.0866	17.8778	20.1612	19.871	18.5146	19.2213	19.0037	15.4691	19.2219	19.8669	19.6535	19.6842	18.6533	19.6285	16.4778	18.1071	0.694299	21.8072	17.0342	18.3209	17.8927	17.586	18.6305	0.460173	18.5343	18.9631	17.7184	18.324	18.917
P78410	BT3A2_HUMAN	Butyrophilin subfamily 3 member A2	BTN3A2 BT3.2 BTF3 BTF4	4	20.1162	18.3514	17.8401	17.7316	18.1472	18.4503	1.62663	18.9219	3.3194	18.4651	18.1619	18.6026	18.8001	19.3498	1.68616	16.1529	19.1539	18.3607	19.1958	19.9758	19.0283	15.9236	19.0312	17.9886	19.4212	18.1417	19.176	18.9845	18.6205	18.6062	18.2884	16.5738	1.6943	25.7086	17.5418	18.0841	1.36217	21.9868	20.0987	1.46017	15.3459	15.6054	18.2034	17.665	18.5719
O00478	BT3A3_HUMAN	Butyrophilin subfamily 3 member A3	BTN3A3 BTF3	5	23.1484	24.9516	22.1478	20.4345	21.5645	23.1319	22.3234	22.013	21.4227	22.4966	20.9463	21.8199	22.2904	22.5594	21.908	22.2549	21.2218	22.2345	21.5412	22.1215	20.9426	21.5317	21.4604	21.7789	21.8932	20.7035	21.9439	23.4782	22.2904	21.8961	21.9973	22.5026	21.8275	25.6369	22.0285	22.6856	22.6571	22.7623	23.3228	24.9874	22.297	22.7524	23.0717	22.2586	25.2468
Q96K17	BT3L4_HUMAN	Transcription factor BTF3 homolog 4 (Basic transcription factor 3-like 4)	BTF3L4	1	21.4366	22.1741	21.9826	21.2242	21.7108	21.715	21.3523	22.7067	21.3329	22.224	22.659	20.8648	17.5586	20.4979	21.7705	20.5365	21.4496	21.0741	20.8383	20.6257	20.9985	21.9808	21.4332	21.4442	21.2769	19.3961	21.12	20.2923	21.2536	20.321	20.2539	22.2688	22.3593	21.9627	22.0789	21.6301	21.9778	19.9018	22.7128	24.1395	20.6102	24.1038	23.1271	15.82	4.20668
P43251	BTD_HUMAN	Biotinidase (Biotinase) (EC 3.5.1.12)	BTD	5	24.4537	25.59	25.1892	24.2601	25.3614	25.6533	24.924	25.8216	25.5709	25.1754	25.058	25.6148	24.5563	25.0738	25.1041	25.1421	24.9951	25.2403	24.757	24.8262	25.7702	24.5245	25.7396	25.6888	25.5851	25.3709	25.3819	25.7369	25.293	24.2203	25.2923	25.5344	26.3786	24.8048	25.0593	25.4177	26.0392	25.4628	24.7123	25.1838	24.7989	25.0416	25.3474	25.4941	26.5974
O43684	BUB3_HUMAN	Mitotic checkpoint protein BUB3	BUB3	3	22.0953	22.1955	22.6174	22.5432	20.9978	22.9073	22.4631	21.9999	22.2323	22.2801	21.6797	22.0137	22.0496	22.0742	22.227	21.9199	21.0024	21.6815	21.0695	20.3073	21.3293	19.9807	20.9021	21.3139	21.2519	21.2021	21.3629	22.683	20.3906	19.875	21.5685	21.7889	22.8846	20.7132	20.7357	20.875	22.1396	20.6445	21.8589	22.5517	22.4367	20.7423	22.5849	21.8066	23.8946
Q7L1Q6	BZW1_HUMAN	Basic leucine zipper and W2 domain-containing protein 1 (Protein Orf)	BZW1 BZAP45 KIAA0005	5	24.1071	24.4058	24.1587	23.7941	23.1926	24.1559	23.3436	23.46	23.9221	24.0612	23.054	23.881	24.4294	23.8431	24.0003	23.2412	23.853	23.9239	23.8368	23.5776	23.5783	24.1237	23.5774	23.1889	23.306	23.7563	24.8237	24.6708	22.7835	24.3605	23.8729	23.8488	24.0576	23.5501	23.0225	23.8861	24.2584	23.115	24.6703	24.5844	22.9931	24.1247	23.9478	23.7672	25.4827
Q9Y6E2	BZW2_HUMAN	Basic leucine zipper and W2 domain-containing protein 2	BZW2 HSPC028 MSTP017	3	24.0445	22.2721	24.7851	24.73	23.837	24.8743	24.2917	24.9277	23.7429	24.6658	24.2799	24.2656	25.0514	24.7186	24.7264	24.1726	24.4333	24.282	24.8579	23.4814	24.5504	24.3518	23.8168	23.2737	24.4269	24.6308	24.8932	25.1656	23.023	23.678	24.8745	24.4004	24.3461	23.9994	24.064	24.1559	23.6912	23.7266	24.6914	25.2567	23.6387	25.1578	25.1254	24.1066	23.3962
Q86VB7	C163A_HUMAN	Scavenger receptor cysteine-rich type 1 protein M130 (Hemoglobin scavenger receptor) (CD antigen CD163) [Cleaved into: Soluble CD163 (sCD163)]	CD163 M130	19	25.7011	25.1519	25.6644	24.7212	27.0865	25.5355	25.4006	24.7195	25.5344	25.707	25.2616	25.2757	24.9005	26.1107	25.6237	24.8445	25.1257	25.3393	25.3539	25.4512	25.0205	25.1116	25.7357	24.9423	25.2304	24.7608	24.9012	25.5566	26.0466	24.6056	25.3569	25.6127	26.0277	30.2346	24.9677	27.3046	25.6395	25.4332	26.6118	25.0551	24.9358	24.7873	25.2377	24.7475	26.8984
Q9Y4F5	C170B_HUMAN	Centrosomal protein of 170 kDa protein B (Centrosomal protein 170B) (Cep170B)	CEP170B FAM68C KIAA0284	11	24.8155	23.7248	24.1334	24.4547	25.6607	24.3781	24.9882	25.966	25.5414	24.929	25.5413	23.6887	24.1025	23.4473	24.0366	24.2033	25.0761	23.0186	25.1847	24.9688	25.0791	24.7221	24.7997	23.9691	25.0401	25.7595	24.8944	24.6299	24.4348	24.3871	23.3838	23.0841	25.2148	24.8455	24.3352	24.6705	24.9964	23.6952	23.6821	24.6651	24.6821	25.1636	23.5515	24.1736	24.8859
Q96EU7	C1GLC_HUMAN	C1GALT1-specific chaperone 1 (C38H2-like protein 1) (C38H2-L1) (Core 1 beta1,3-galactosyltransferase 2) (C1Gal-T2) (C1GalT2) (Core 1 beta3-Gal-T2) (Core 1 beta3-galactosyltransferase-specific molecular chaperone)	C1GALT1C1 COSMC HSPC067 MSTP143 UNQ273/PRO310	5	23.7251	24.213	25.132	25.2561	23.804	24.4959	24.7318	24.5673	25.6231	24.4081	23.7297	23.856	24.2258	23.967	24.2741	24.6838	25.1875	24.7651	24.0666	25.2063	24.6096	24.8122	25.0998	24.5732	24.053	24.5391	24.1732	23.7487	24.6441	24.6853	23.9556	23.0321	25.1303	25.0176	24.4926	24.4511	24.6707	23.7609	23.3304	23.9046	24.0859	24.3889	24.3485	25.7805	26.316
Q9NS00	C1GLT_HUMAN	Glycoprotein-N-acetylgalactosamine 3-beta-galactosyltransferase 1 (EC 2.4.1.122) (B3Gal-T8) (Core 1 O-glycan T-synthase) (Core 1 UDP-galactose:N-acetylgalactosamine-alpha-R beta 1,3-galactosyltransferase 1) (Beta-1,3-galactosyltransferase) (Core 1 beta1,3-galactosyltransferase 1) (C1GalT1) (Core 1 beta3-Gal-T1)	C1GALT1	6	24.7584	25.7036	25.956	25.4585	24.7008	26.562	26.0974	25.8282	25.3872	25.6563	25.1932	26.3103	25.8246	25.2346	25.9806	25.337	26.0726	26.1476	25.7168	26.2045	25.8928	26.4066	26.3486	26.2129	25.5062	25.6255	25.9785	26.8599	25.5378	25.7567	25.731	26.5285	26.1586	25.7502	25.7049	26.3071	26.2447	24.6066	25.2338	25.9514	25.3196	25.0894	25.6001	26.7198	28.1033
P02746	C1QB_HUMAN	Complement C1q subcomponent subunit B	C1QB	2	22.3881	20.6499	21.4255	23.5309	20.5604	18.0006	20.4789	19.51	21.4248	20.7984	18.8774	20.5863	22.7399	19.8323	21.5292	21.3526	23.8673	22.9949	19.8755	24.058	20.947	20.4858	21.5991	21.293	21.5747	20.9087	20.5348	21.95	22.1068	20.8115	20.2238	21.4408	20.6859	25.526	20.0855	23.5855	20.7303	23.8891	21.6413	19.6365	20.7177	19.5737	19.5621	20.4295	23.9438
Q07021	C1QBP_HUMAN	Complement component 1 Q subcomponent-binding protein, mitochondrial (ASF/SF2-associated protein p32) (Glycoprotein gC1qBP) (C1qBP) (Hyaluronan-binding protein 1) (Mitochondrial matrix protein p32) (gC1q-R protein) (p33) (SF2AP32)	C1QBP GC1QBP HABP1 SF2P32	9	31.3355	32.7029	32.387	30.8256	31.8456	32.1043	32.5952	30.935	30.8908	32.7343	32.231	32.1754	31.3019	31.691	31.4044	32.2911	30.7209	32.2962	30.7626	30.6653	31.2847	30.5019	30.9814	32.264	31.4333	31.0316	30.1693	31.4855	32.1821	31.3267	31.8596	31.9643	32.9747	30.1121	32.0955	30.3307	31.8741	32.1428	32.0423	31.7603	31.4469	31.3048	31.7287	31.6825	32.6737
P02747	C1QC_HUMAN	Complement C1q subcomponent subunit C	C1QC C1QG	2	23.5361	19.6638	20.2217	22.0054	20.4501	17.3798	20.2688	19.7281	2.3194	19.4633	20.1476	17.7597	23.5121	22.2703	20.8987	20.6547	21.9581	21.7541	21.0184	22.7387	18.2164	20.506	20.4243	20.5669	19.1017	20.5282	20.7986	18.8871	22.0271	17.8455	19.5465	19.1253	19.7214	26.4608	21.3561	24.381	20.0501	24.0637	22.643	19.3089	21.8203	20.7006	17.9353	21.0241	25.4164
Q9BXJ0	C1QT5_HUMAN	Complement C1q tumor necrosis factor-related protein 5	C1QTNF5 CTRP5 UNQ303/PRO344	4	25.9796	25.5584	26.0893	25.754	26.3639	25.7722	25.7623	25.4125	27.2028	25.8319	26.3637	26.2654	26.8553	26.6961	26.473	26.0694	25.331	27.1866	26.511	27.6177	26.0863	26.2709	26.6744	27.125	26.4926	26.3232	27.7365	27.7757	26.7716	27.1149	26.9348	27.1465	25.4042	25.9817	26.1241	26.1406	25.1556	25.9023	25.081	26.1925	26.1502	25.824	25.7554	27.3391	29.6822
P11586	C1TC_HUMAN	C-1-tetrahydrofolate synthase, cytoplasmic (C1-THF synthase) [Cleaved into: C-1-tetrahydrofolate synthase, cytoplasmic, N-terminally processed] [Includes: Methylenetetrahydrofolate dehydrogenase (EC 1.5.1.5); Methenyltetrahydrofolate cyclohydrolase (EC 3.5.4.9); Formyltetrahydrofolate synthetase (EC 6.3.4.3)]	MTHFD1 MTHFC MTHFD	27	28.6902	29.1906	28.6566	28.5571	28.5571	29.2267	29.0712	28.9702	29.1315	28.8055	28.4726	28.7288	28.5566	28.4769	28.7674	28.125	29.9206	28.5243	29.3799	29.2858	29.1046	29.7805	29.2875	28.3316	29.0955	28.937	29.7725	29.2239	28.0432	28.406	28.7484	28.7856	29.4708	28.9513	28.2669	29.7152	29.2077	28.0395	28.9158	29.3211	28.664	28.8756	29.0669	28.3499	30.6615
Q6UB35	C1TM_HUMAN	Monofunctional C1-tetrahydrofolate synthase, mitochondrial (EC 6.3.4.3) (Formyltetrahydrofolate synthetase)	MTHFD1L FTHFSDC1	2	22.3529	22.7698	22.4821	22.7201	22.6003	23.1678	23.1641	22.7777	23.0194	22.8303	22.315	22.6967	22.5697	22.5482	23.0126	22.6442	22.5029	22.9502	22.8619	22.3987	22.3054	22.4048	22.8392	22.7173	22.6842	22.5327	22.707	23.3375	22.5259	22.577	22.4886	22.8986	23.6588	22.4592	22.6291	22.9508	23.0568	22.9287	22.2192	23.0686	22.7255	22.2804	22.9766	23.065	23.1238
O14523	C2C2L_HUMAN	Phospholipid transfer protein C2CD2L (C2 domain-containing protein 2-like) (C2CD2-like) (Transmembrane protein 24)	C2CD2L KIAA0285 TMEM24 DLNB23	2	20.1215	21.1887	21.1102	19.2138	20.3219	21.6539	19.9032	20.9503	19.8642	19.4829	17.7193	18.9951	18.5423	18.8813	21.1159	21.0148	20.3294	20.7188	20.6572	19.7823	20.8213	20.1309	19.8103	19.6946	19.2525	20.7836	20.2434	17.2912	20.6906	19.5038	20.9023	19.6579	22.1742	20.5834	20.2799	18.3426	21.2717	19.0675	19.9069	19.8303	20.1786	20.1847	21.2346	21.2709	16.1527
Q9Y426	C2CD2_HUMAN	C2 domain-containing protein 2 (Transmembrane protein 24-like)	C2CD2 C21orf25 C21orf258 TMEM24L	3	21.676	21.1628	23.0294	22.9122	22.3223	22.6071	23.1637	22.2552	22.41	22.5956	22.3355	22.2736	23.0297	23.0191	22.7281	22.9751	21.9448	22.5249	23.4443	23.8574	22.1567	22.5843	22.9024	22.8403	22.9313	22.4099	22.582	23.2307	23.0749	23.9914	22.2853	23.6614	23.477	22.3425	23.8927	22.406	23.4544	23.6095	21.6007	22.5792	22.5731	22.0177	22.4822	22.651	24.2494
Q86YS7	C2CD5_HUMAN	C2 domain-containing protein 5 (C2 domain-containing phosphoprotein of 138 kDa)	C2CD5 CDP138 KIAA0528	3	23.239	23.6165	23.1702	22.7283	22.7214	23.5779	23.7095	21.6065	22.5433	24.08	22.5885	23.3085	23.4328	23.8065	23.3195	22.8919	21.6528	23.4218	21.8274	21.8007	22.4747	22.5431	22.0583	23.0257	23.4716	22.2928	22.3608	24.2822	23.1331	22.5159	24.073	24.017	23.0036	23.2509	22.9744	22.1429	23.4988	23.1815	23.4677	23.5791	23.9344	22.3558	23.3846	22.9609	25.3366
Q6P1N0	C2D1A_HUMAN	Coiled-coil and C2 domain-containing protein 1A (Akt kinase-interacting protein 1) (Five prime repressor element under dual repression-binding protein 1) (FRE under dual repression-binding protein 1) (Freud-1) (Putative NF-kappa-B-activating protein 023N)	CC2D1A AKI1	11	24.875	25.3957	25.1853	25.131	25.3114	25.3199	24.9793	25.4395	24.9572	25.4754	25.3739	25.2983	25.0186	24.9141	25.4577	24.9975	25.4017	24.6054	25.1504	25.1246	25.2051	25.7237	25.1584	24.4029	25.1225	25.63	26.0147	25.7024	24.2217	25.6568	24.6776	25.3569	25.2256	24.8351	25.0646	24.9418	25.0723	24.6686	25.0941	25.5513	24.4473	25.3977	25.1377	24.5648	25.7783
Q5T0F9	C2D1B_HUMAN	Coiled-coil and C2 domain-containing protein 1B (Five prime repressor element under dual repression-binding protein 2) (FRE under dual repression-binding protein 2) (Freud-2)	CC2D1B KIAA1836	3	22.1311	22.897	22.0396	22.1723	23.0213	22.1904	21.5857	22.1569	22.39	22.5058	22.4998	22.0918	22.0866	22.1501	21.6854	21.4597	22.647	22.0333	22.4665	22.0521	22.4274	22.5955	22.0098	20.9123	21.4549	22.9345	22.611	22.253	19.5101	22.5333	22.0325	21.9858	22.5888	21.5742	21.2016	22.0569	22.5504	20.5942	23.1363	22.1694	21.5725	22.9065	21.937	19.8617	21.841
Q9P2K1	C2D2A_HUMAN	Coiled-coil and C2 domain-containing protein 2A	CC2D2A KIAA1345	1	19.2526	-0.13944	18.7726	21.2527	17.4727	19.1762	19.1137	19.7686	18.3161	20.4432	17.8863	17.6441	20.9504	19.9558	20.2106	17.0224	17.2397	17.4912	20.6573	20.0659	19.1545	19.0164	20.1014	17.3076	18.5937	20.8196	19.7861	19.5913	1.04791	19.8564	20.0596	20.1719	18.3685	20.5398	22.1376	17.6164	20.1035	20.3079	19.9245	18.6972	19.6328	19.0398	20.3216	19.4254	17.1347
Q9NRR3	C42S2_HUMAN	CDC42 small effector protein 2 (Small effector of CDC42 protein 2)	CDC42SE2 SPEC2	2	25.3859	25.6122	24.6086	23.6392	23.7358	25.4057	24.6165	24.2351	23.7586	25.4318	24.7964	24.7188	25.4174	25.5751	25.3333	24.6935	22.9779	24.9481	22.9495	23.4103	23.9002	23.7921	23.766	24.7456	24.4369	24.3463	23.4744	25.6004	24.2516	24.7988	25.9524	25.7382	25.0874	22.4119	24.3171	23.7652	24.7692	25.1244	24.8853	24.9373	24.7416	24.2929	25.1496	23.0618	25.816
P04003	C4BPA_HUMAN	C4b-binding protein alpha chain (C4bp) (Proline-rich protein) (PRP)	C4BPA C4BP	11	25.1381	24.8189	24.2779	24.2335	24.562	24.6218	24.5736	24.2615	25.8206	24.5025	23.7682	23.5345	25.0857	23.9909	23.5158	23.6466	23.7546	24.3902	23.9524	24.8488	24.0176	24.4186	23.9889	25.199	24.3982	24.0667	24.5884	24.5525	28.5226	25.4855	23.8991	23.7143	24.6812	27.7564	25.0738	27.4716	24.8725	24.7458	25.9251	24.7856	24.5973	24.1798	24.8311	25.9215	26.9345
Q99643	C560_HUMAN	Succinate dehydrogenase cytochrome b560 subunit, mitochondrial (Integral membrane protein CII-3) (QPs-1) (QPs1) (Succinate dehydrogenase complex subunit C) (Succinate-ubiquinone oxidoreductase cytochrome B large subunit) (CYBL)	SDHC CYB560 SDH3	3	27.3111	28.4983	29.0227	28.1277	27.9561	29.0437	29.4515	27.4725	28.4386	29.0206	28.3403	28.4541	28.5469	28.3964	28.0477	28.4387	28.2296	28.1899	27.4103	28.3194	28.0203	28.3322	27.8978	28.7325	28.225	28.29	27.7704	28.2612	28.6519	27.5966	27.7028	28.0527	29.2754	28.9266	29.2119	27.7991	28.9467	28.3375	28.1915	28.5489	28.7321	27.6455	28.4898	27.7916	26.8948
Q8TCZ2	C99L2_HUMAN	CD99 antigen-like protein 2 (MIC2-like protein 1) (CD antigen CD99)	CD99L2 MIC2L1 UNQ1964/PRO4486	4	27.8092	27.8765	27.5587	27.1954	27.5204	27.6764	27.3487	26.7672	27.3502	27.4868	27.6283	27.5797	27.813	27.4557	27.449	27.7055	26.6363	27.8684	26.6828	26.9272	27.348	26.7148	26.4445	27.2914	26.7244	26.4072	26.3304	28.239	27.381	27.0876	28.174	28.3248	27.5623	26.4159	27.7925	27.2812	27.8573	27.688	27.4263	27.7722	27.2404	27.1055	27.424	26.7527	29.2587
Q9BWL3	CA043_HUMAN	Protein C1orf43 (Hepatitis C virus NS5A-transactivated protein 4) (HCV NS5A-transactivated protein 4) (Protein NICE-3) (S863-3)	C1orf43 NICE3 NS5ATP4 HSPC012	7	25.9151	26.0782	26.1081	25.8275	25.1122	26.5487	26.8758	26.1348	26.8833	26.441	25.0033	25.8932	26.06	26.1226	26.0359	25.6514	25.601	26.0659	25.7168	25.6015	25.86	25.884	25.405	25.7422	25.5836	26.0216	25.8235	26.1172	25.3871	25.6153	25.8757	26.4047	26.3117	25.1161	26.1439	26.0062	25.9438	25.8628	25.7535	26.1126	26.1366	25.9756	26.2705	25.1546	26.6913
Q9H425	CA198_HUMAN	Uncharacterized protein C1orf198	C1orf198	3	24.5638	25.1284	24.5396	24.2766	24.833	25.2683	25.2969	23.6128	23.8411	26.0021	24.7591	24.5629	24.8471	24.2808	24.734	24.161	23.4576	25.1684	23.8362	23.7958	23.5886	24.0234	23.8384	24.6924	23.5035	23.8328	23.0887	25.7858	24.5291	24.2824	24.9887	25.7461	24.9505	22.9466	24.6269	24.1237	24.1726	25.3262	24.8737	24.5794	24.6917	23.8176	24.1062	23.088	26.1183
A1L170	CA226_HUMAN	Uncharacterized protein C1orf226	C1orf226	2	21.6273	22.4891	23.048	23.0189	23.541	23.2118	22.8423	23.534	22.2725	23.2017	23.9797	22.9063	23.8694	22.884	22.4745	22.5061	22.7656	22.9195	22.6086	22.207	22.7811	22.4872	23.1968	22.0134	22.9072	23.8681	23.0931	24.0819	22.2467	22.9242	23.8046	23.2576	23.2647	19.9381	23.4521	20.2821	22.8295	21.9462	21.6754	22.6468	23.2052	22.3173	23.3522	22.6742	22.7022
P54289	CA2D1_HUMAN	Voltage-dependent calcium channel subunit alpha-2/delta-1 (Voltage-gated calcium channel subunit alpha-2/delta-1) [Cleaved into: Voltage-dependent calcium channel subunit alpha-2-1; Voltage-dependent calcium channel subunit delta-1]	CACNA2D1 CACNL2A CCHL2A MHS3	8	25.2361	24.4238	24.4836	24.7277	24.3714	24.9085	24.5534	24.7107	25.5201	24.92	23.8125	24.8673	25.4817	25.1185	24.5703	24.6689	24.4995	24.2562	24.739	25.1298	25.139	25.7919	25.4802	24.7973	25.7477	24.8925	25.9886	25.5148	25.4195	25.7396	25.3626	24.8814	24.6403	25.6989	24.6096	24.7693	24.9145	25.0594	25.3998	24.4412	24.8916	24.0307	24.4812	25.9662	28.023
Q9NY47	CA2D2_HUMAN	Voltage-dependent calcium channel subunit alpha-2/delta-2 (Voltage-gated calcium channel subunit alpha-2/delta-2) [Cleaved into: Voltage-dependent calcium channel subunit alpha-2-2; Voltage-dependent calcium channel subunit delta-2]	CACNA2D2 KIAA0558	7	25.0935	24.669	24.2819	24.2213	24.0327	24.6899	24.5104	24.1631	25.1931	24.2601	23.9948	24.7626	25.1575	24.9963	24.8062	24.8306	24.0318	24.911	24.7663	24.8066	24.3203	24.5651	24.6481	24.7964	24.7695	24.3584	24.9175	25.1551	24.8623	24.5283	25.0508	24.9908	24.3822	24.4781	24.4373	24.5262	24.984	24.9429	25.1599	24.414	24.4191	23.9206	24.6911	25.1749	26.6912
Q9Y376	CAB39_HUMAN	Calcium-binding protein 39 (MO25alpha) (Protein Mo25)	CAB39 MO25 CGI-66	4	23.9344	24.6866	24.0662	22.2505	21.4322	23.4099	23.7891	21.5409	22.6153	23.5445	22.732	24.486	22.9814	23.9839	23.8229	22.7539	22.2648	24.236	22.4113	22.6607	22.2417	22.0826	21.8264	22.0418	22.652	22.5857	22.947	24.5632	21.3994	22.1634	25.1111	23.9941	24.0572	23.5694	22.9477	23.3325	23.9425	22.7226	24.5083	23.6154	23.1994	22.815	23.8586	22.3538	24.925
Q9BRK5	CAB45_HUMAN	45 kDa calcium-binding protein (Cab45) (Stromal cell-derived factor 4) (SDF-4)	SDF4 CAB45 PSEC0034	6	24.3268	24.9235	25.3162	25.4685	25.9471	25.1773	24.3684	23.4254	25.816	24.6697	25.9444	24.8926	23.8187	25.4809	24.0477	24.6026	24.1528	24.7131	25.0451	24.8355	25.5722	24.3174	25.4445	25.1621	24.5315	24.3316	24.7612	24.5337	25.2885	24.1211	25.2131	24.2074	25.0088	25.2167	23.6987	23.4424	23.7145	25.0656	23.5128	23.9001	23.9238	25.2444	24.8585	25.7432	27.1195
Q08289	CACB2_HUMAN	Voltage-dependent L-type calcium channel subunit beta-2 (CAB2) (Calcium channel voltage-dependent subunit beta 2) (Lambert-Eaton myasthenic syndrome antigen B) (MYSB)	CACNB2 CACNLB2 MYSB	3	23.8844	24.8574	24.8317	24.1924	23.5231	25.0518	25.2138	24.7815	24.9008	24.5307	23.5994	24.5921	24.7878	24.2811	24.6311	24.7445	24.1842	24.6748	23.1021	24.7387	24.564	24.0749	24.093	24.3578	24.5699	24.1953	24.9875	25.1084	24.3742	24.7933	24.2934	24.3432	24.5992	23.3012	24.8265	24.1221	23.4204	24.5739	23.8037	25.3411	24.6135	23.7905	25.1159	24.3739	28.8743
Q9P1Z2	CACO1_HUMAN	Calcium-binding and coiled-coil domain-containing protein 1 (Calphoglin) (Coiled-coil coactivator protein) (Sarcoma antigen NY-SAR-3)	CALCOCO1 KIAA1536 PP13275 UNQ2436/PRO4996	4	22.4923	22.7525	22.8488	23.3804	24.6196	23.0785	23.4687	23.4756	23.1658	23.5821	24.0942	23.1197	22.0678	22.0848	23.1672	22.9608	24.462	22.5579	24.2138	23.7874	23.6325	24.4008	24.172	22.1651	22.2584	23.8435	24.6599	22.9407	22.3996	24.1036	22.1026	22.2384	22.8303	23.3561	22.8807	23.3846	22.8437	22.7139	23.0266	23.4792	22.773	23.7669	22.4439	22.7528	23.8607
Q13137	CACO2_HUMAN	Calcium-binding and coiled-coil domain-containing protein 2 (Antigen nuclear dot 52 kDa protein) (Nuclear domain 10 protein NDP52) (Nuclear domain 10 protein 52) (Nuclear dot protein 52)	CALCOCO2 NDP52	14	25.259	25.7463	25.3778	24.8294	26.1271	25.6226	25.4328	25.5983	25.5775	25.2111	25.7547	25.9499	26.364	25.9349	26.0642	25.7386	26.0014	25.8154	25.9151	25.2416	25.2565	26.0243	25.2328	24.6341	25.5552	25.9532	26.8691	26.1427	24.7886	25.1467	25.7351	25.3376	25.4946	25.4828	25.2581	25.1	24.9829	25.4616	25.5346	25.689	25.3728	25.4398	25.6203	24.9672	27.3696
P43155	CACP_HUMAN	Carnitine O-acetyltransferase (Carnitine acetylase) (EC 2.3.1.137) (EC 2.3.1.7) (Carnitine acetyltransferase) (CAT) (CrAT)	CRAT CAT1	21	26.6778	28.4358	28.2013	27.2968	27.3142	28.063	28.2717	26.9721	27.1479	28.4617	27.352	27.7804	27.2258	27.2033	27.5316	28.368	26.5142	28.1223	26.3674	26.7983	27.2023	26.7374	26.812	27.7934	27.4352	26.9029	26.4224	27.8384	27.8938	27.0799	27.7978	27.8271	28.8461	26.1442	28.0678	26.1344	27.8119	28.2921	27.477	27.8112	27.3076	26.5418	27.3064	27.3943	29.867
P55287	CAD11_HUMAN	Cadherin-11 (OSF-4) (Osteoblast cadherin) (OB-cadherin)	CDH11	3	21.5891	21.122	18.7354	18.2388	19.4897	1.3068	20.3813	16.9618	18.5896	18.6527	1.56596	19.4752	17.4095	19.4622	19.0645	18.3399	19.1942	1.34735	18.5989	19.7374	17.2651	17.5831	16.4879	17.7408	16.1395	16.8054	17.646	19.2676	20.3873	17.6727	18.8604	18.4101	19.7424	19.351	19.1727	19.9398	20.2423	18.575	23.8714	17.9828	20.57	18.0127	18.5994	18.2933	18.354
P12830	CADH1_HUMAN	Cadherin-1 (CAM 120/80) (Epithelial cadherin) (E-cadherin) (Uvomorulin) (CD antigen CD324) [Cleaved into: E-Cad/CTF1; E-Cad/CTF2; E-Cad/CTF3]	CDH1 CDHE UVO	12	27.9061	27.1084	27.2521	26.7005	25.8022	27.5067	26.9407	26.221	27.693	26.2054	27.4846	27.1553	27.6464	26.723	27.1742	26.9622	26.8064	27.8918	25.893	26.4241	27.2204	26.6393	26.5853	26.6242	27.0308	26.6267	26.0382	27.2214	26.5817	27.172	26.6848	27.1009	27.1535	26.3345	27.3252	26.0518	26.5334	26.7552	26.8975	26.9163	26.8299	26.5638	27.6152	26.766	28.9045
P19022	CADH2_HUMAN	Cadherin-2 (CDw325) (Neural cadherin) (N-cadherin) (CD antigen CD325)	CDH2 CDHN NCAD	6	21.4461	21.4244	20.9555	20.6016	21.739	19.736	20.502	20.8356	22.6599	21.2869	21.8688	20.3469	21.6773	23.5129	20.3496	20.9823	20.9863	22.031	23.4576	22.8318	21.1053	21.2427	21.0934	21.9501	22.0788	20.9469	22.2985	20.5623	23.2912	23.4835	21.0408	21.9723	20.127	23.341	21.3602	21.0765	21.9102	21.8093	21.076	21.2893	21.4738	22.0123	20.317	23.1049	22.9037
P22223	CADH3_HUMAN	Cadherin-3 (Placental cadherin) (P-cadherin)	CDH3 CDHP	25	29.8419	30.4345	29.9419	30.0765	29.3431	30.5631	30.3577	30.8593	31.504	30.4408	30.3204	30.0103	30.1034	30.2083	29.4303	29.6764	30.6929	30.3816	30.8282	30.6837	30.4504	30.5475	30.784	30.3739	30.3602	30.0634	30.6677	29.9329	30.6253	30.9325	29.6831	29.9332	30.5185	30.7079	31.4333	30.3651	30.6102	30.572	29.7983	29.9944	30.0619	30.6154	30.1088	30.8601	31.4443
Q9BY67	CADM1_HUMAN	Cell adhesion molecule 1 (Immunoglobulin superfamily member 4) (IgSF4) (Nectin-like protein 2) (NECL-2) (Spermatogenic immunoglobulin superfamily) (SgIgSF) (Synaptic cell adhesion molecule) (SynCAM) (Tumor suppressor in lung cancer 1) (TSLC-1)	CADM1 IGSF4 IGSF4A NECL2 SYNCAM TSLC1	8	25.5486	25.7929	25.073	25.3444	24.6457	25.1167	25.5997	24.7101	25.4834	25.4747	25.2483	25.2208	25.9449	25.8666	25.4395	25.2249	25.2097	25.65	25.6829	25.9541	24.9904	25.2719	25.3894	25.6963	25.7469	24.7757	25.6542	25.217	26.6486	26.0689	25.6454	25.6603	25.7383	25.4697	25.6271	25.0336	25.7897	25.7367	24.6633	24.954	25.527	25.0666	24.9963	26.3898	27.4817
Q8N3J6	CADM2_HUMAN	Cell adhesion molecule 2 (Immunoglobulin superfamily member 4D) (IgSF4D) (Nectin-like protein 3) (NECL-3) (Synaptic cell adhesion molecule 2) (SynCAM 2)	CADM2 IGSF4D NECL3	11	27.5752	28.22	27.2489	27.378	25.8271	27.7597	28.0739	26.7574	28.4318	27.3837	27.6239	27.4522	27.1676	27.6279	27.4314	27.2337	26.633	27.0337	27.3066	26.6238	27.056	27.1445	26.3874	27.6189	27.3123	27.1847	26.4256	26.4882	27.5892	27.2889	27.6922	26.9549	28.3936	27.31	28.0012	26.772	28.0799	26.5696	26.9728	27.553	27.8644	27.4956	27.5454	28.213	28.9173
Q8N126	CADM3_HUMAN	Cell adhesion molecule 3 (Brain immunoglobulin receptor) (Immunoglobulin superfamily member 4B) (IgSF4B) (Nectin-like protein 1) (NECL-1) (Synaptic cell adhesion molecule 3) (SynCAM3) (TSLC1-like protein 1) (TSLL1)	CADM3 IGSF4B NECL1 SYNCAM3 TSLL1 UNQ225/PRO258	4	25.2173	23.8793	23.4489	24.1823	22.9843	23.4268	24.4722	23.2921	25.3509	23.5052	22.528	23.4598	24.0819	24.3929	23.5682	24.2642	23.7729	24.5436	24.0195	23.5507	23.8619	24.4274	24.0364	23.833	23.6786	22.7104	24.1123	23.7835	25.4741	24.3416	23.887	23.361	23.5929	24.3214	24.4002	23.0246	23.3868	24.2543	23.5664	23.2755	24.2604	23.0972	24.4618	24.3701	26.7597
Q8NFZ8	CADM4_HUMAN	Cell adhesion molecule 4 (Immunoglobulin superfamily member 4C) (IgSF4C) (Nectin-like protein 4) (NECL-4) (TSLC1-like protein 2)	CADM4 IGSF4C NECL4 TSLL2	9	28.3303	29.1205	28.4294	28.2209	28.2321	28.7523	29.2468	27.166	29.7601	28.8645	28.6207	28.1832	28.4478	27.9835	28.971	28.8033	28.101	28.3129	27.6008	27.3885	28.5559	28.5733	27.4639	28.6924	28.6213	28.4914	26.736	29.5419	28.6495	28.3522	28.7924	29.1552	29.0194	27.3837	28.6758	28.0719	28.5391	28.6459	28.389	28.8327	28.9165	28.4877	28.4913	27.4532	30.3157
Q5T440	CAF17_HUMAN	Putative transferase CAF17, mitochondrial (EC 2.1.-.-) (Iron-sulfur cluster assembly factor homolog)	IBA57 C1orf69	10	25.9608	27.3543	27.4241	26.2368	26.2733	27.5124	27.6844	26.0184	26.4104	27.8257	26.4661	27.0839	26.7469	26.5688	26.098	27.3727	25.9312	26.9142	25.2084	25.4895	26.1519	25.6078	26.0447	26.9147	26.6495	26.4455	25.7413	27.0249	27.4692	26.4512	27.0472	27.1166	28.0879	24.8898	27.5492	25.0025	26.9928	27.204	26.9362	26.7927	26.8933	26.1788	26.786	27.5017	28.0873
P00915	CAH1_HUMAN	Carbonic anhydrase 1 (EC 4.2.1.1) (Carbonate dehydratase I) (Carbonic anhydrase B) (CAB) (Carbonic anhydrase I) (CA-I)	CA1	11	31.879	33.0817	27.9959	27.7887	29.3428	28.8446	27.8565	27.5424	27.793	29.6296	27.6803	27.8393	28.04	29.7153	28	27.8826	27.3986	28.4242	28.2564	28.297	28.9808	27.7678	28.8058	30.483	27.7685	27.9377	27.5902	28.9821	30.7924	27.5165	29.2386	28.9915	28.1384	27.674	28.2542	31.47	28.2475	29.8785	30.8336	28.7967	28.0224	27.2203	28.3467	31.1317	30.8436
Q9ULX7	CAH14_HUMAN	Carbonic anhydrase 14 (EC 4.2.1.1) (Carbonate dehydratase XIV) (Carbonic anhydrase XIV) (CA-XIV)	CA14 UNQ690/PRO1335	8	31.6912	31.1487	30.9629	30.8395	30.2355	31.2462	31.6065	30.7426	31.1496	31.2744	30.2698	31.4097	31.4019	31.8097	31.6503	30.9175	30.5108	31.954	30.0303	30.8581	30.8522	30.3165	30.5437	31.8937	30.903	30.6971	30.5959	32.1167	31.1691	30.2506	32.0421	32.3864	31.3454	30.5459	30.7342	31.4893	31.2774	31.2682	31.4547	32.4317	31.58	31.4007	30.8621	30.9639	34.1548
P00918	CAH2_HUMAN	Carbonic anhydrase 2 (EC 4.2.1.1) (Carbonate dehydratase II) (Carbonic anhydrase C) (CAC) (Carbonic anhydrase II) (CA-II)	CA2	11	29.0403	30.3667	27.505	27.8022	27.1991	28.5175	28.2448	27.5182	27.563	28.3622	27.9991	28.5995	28.1819	28.137	28.9007	27.3936	27.9089	27.384	28.0654	28.3599	28.198	27.9925	28.7308	28.5095	27.5574	28.637	28.0432	27.8078	28.3803	27.2843	28.4434	28.1193	27.4783	27.8446	28.9046	29.0699	28.9378	28.4778	28.9028	28.0933	27.6159	27.1941	28.501	29.1854	29.0001
P07451	CAH3_HUMAN	Carbonic anhydrase 3 (EC 4.2.1.1) (Carbonate dehydratase III) (Carbonic anhydrase III) (CA-III)	CA3	1	17.1752	17.6969	17.8019	17.2292	0.553025	19.046	17.0368	20.951	18.4255	17.3369	17.6027	18.4211	18.3637	16.3834	17.8005	17.9226	18.2393	18.8994	16.9984	18.8682	18.1613	19.1303	19.5612	17.6507	19.0924	17.1939	16.4012	16.462	16.8603	18.2215	17.4671	18.834	19.7094	17.3144	17.7133	17.905	17.9699	16.2754	18.8799	18.017	18.1563	17.2113	18.3813	17.8292	19.8133
Q9Y2D0	CAH5B_HUMAN	Carbonic anhydrase 5B, mitochondrial (EC 4.2.1.1) (Carbonate dehydratase VB) (Carbonic anhydrase VB) (CA-VB)	CA5B	7	26.4318	27.6508	28.0087	25.7881	26.7701	27.8855	27.1816	25.0372	25.2683	28.0131	26.7473	27.2481	26.4323	26.0858	26.1077	27.051	24.874	27.5323	24.7538	25.2468	25.865	25.2756	25.3236	26.7525	26.2164	25.6805	25.1774	26.7864	26.5134	25.7323	27.1908	26.9781	27.6022	23.8596	27.3374	24.7129	26.6843	27.24	27.0404	26.7056	25.9312	25.2019	26.9213	26.5667	28.3921
P35219	CAH8_HUMAN	Carbonic anhydrase-related protein (CARP) (Carbonic anhydrase VIII) (CA-VIII)	CA8 CALS	2	19.9033	21.7623	21.6129	19.4541	19.0356	19.9992	0.62663	17.2698	21.3979	19.2885	19.9658	18.3279	17.5841	19.7826	20.4083	20.949	20.0459	19.2562	19.0814	18.4566	19.374	20.6132	19.3386	18.28	19.0794	20.7933	20.8897	20.9276	2.04791	18.0536	20.6418	18.4123	20.9486	20.1167	16.2571	19.5325	21.0867	18.0027	20.7365	21.5435	18.4311	21.0921	19.32	16.5437	18.5155
Q8N5C1	CAHM5_HUMAN	Calcium homeostasis modulator protein 5 (Protein FAM26E)	CALHM5 C6orf188 FAM26E	4	24.0319	20.7526	19.0782	19.8282	22.397	20.2633	21.0504	19.4891	19.8272	20.3531	20.1853	21.3431	18.4889	22.8733	19.9652	18.9864	19.8198	18.0956	19.0117	19.2381	19.3874	19.1998	18.5473	19.7756	18.9856	19.4714	19.4983	17.2908	20.8642	15.5448	19.1782	19.907	21.3691	21.2344	19.3171	23.1355	22.4861	20.5789	24.9173	20.2158	21.6895	18.8762	19.7986	19.6487	22.7737
P05937	CALB1_HUMAN	Calbindin (Calbindin D28) (D-28K) (Vitamin D-dependent calcium-binding protein, avian-type)	CALB1 CAB27	2	19.5335	20.4925	0.696136	21.4015	18.4142	20.7001	16.2125	21.7946	20.2266	16.7927	20.6402	19.1773	20.7093	20.1006	19.4077	19.0184	19.774	18.7414	21.843	20.7535	19.318	18.4449	20.6425	18.0535	1.24677	23.5756	21.616	20.9993	19.7904	18.6847	22.2206	20.7687	17.5681	21.886	23.4103	20.7484	22.5361	22.2658	19.277	20.2635	0.948039	19.8419	19.7896	21.497	17.8879
P22676	CALB2_HUMAN	Calretinin (CR) (29 kDa calbindin)	CALB2 CAB29	1	19.0729	19.6513	-0.303864	20.8115	16.0193	20.4485	-0.37337	20.9077	20.0148	16.7927	20.6402	18.7161	20.4835	19.6806	19.2554	18.3088	19.5134	18.7414	21.7329	20.4608	18.2941	18.3058	20.2831	18.0535	0.246775	22.8868	21.2248	20.9055	19.7904	18.4346	21.7389	20.3029	-0.305701	21.5812	22.8125	20.5408	22.0828	21.7343	18.8124	20.2635	-0.0519605	19.4109	19.1287	21.1257	17.8878
Q05682	CALD1_HUMAN	Caldesmon (CDM)	CALD1 CAD CDM	4	24.3177	21.9984	20.4058	21.0896	22.4453	19.3091	20.4808	18.5449	19.7589	22.1978	22.1107	22.0752	22.7806	23.1282	20.8319	19.6543	19.598	21.5274	20.5535	20.9273	19.9382	19.8485	19.0428	20.2294	20.7299	19.2101	19.3122	21.3028	21.7373	20.871	21.1694	21.6415	20.8212	23.1615	17.3552	21.8905	22.5118	22.3913	24.7912	20.564	22.5302	19.5535	19.2316	20.6961	24.4268
P27482	CALL3_HUMAN	Calmodulin-like protein 3 (CaM-like protein) (CLP) (Calmodulin-related protein NB-1)	CALML3	1	27.6651	24.5753	24.7835	25.5235	25.8398	24.5707	25.4174	23.9368	26.1887	25.0867	26.0659	24.9687	25.9737	25.6706	25.0305	24.7425	24.6134	25.1356	23.976	25.3352	23.9857	24.6361	24.6428	25.1046	25.4022	24.4116	24.856	25.753	25.6159	25.5613	25.4267	25.5716	24.8384	24.2719	24.9148	24.617	24.8431	25.97	24.9383	25.0848	25.4975	24.9022	24.8063	24.7363	26.8168
Q96GE6	CALL4_HUMAN	Calmodulin-like protein 4 (Serologically defined breast cancer antigen NY-BR-20)	CALML4	6	24.1154	24.421	24.7386	23.9284	24.8611	24.8188	25.4087	23.9136	24.3548	25.279	25.0234	25.1908	24.8404	25.0739	24.7155	24.5067	23.7954	24.7522	23.9476	24.2635	24.6423	23.9039	24.1682	25.7009	24.7076	23.9437	23.2066	24.9289	25.0792	23.6555	25.0089	24.7331	25.2297	23.2436	25.6611	22.4779	24.1908	24.2843	24.6153	24.2862	24.5571	25.0242	24.9125	24.4983	25.8302
P0DP23	CALM1_HUMAN	Calmodulin-1	CALM1 CALM CAM CAM1	11	33.6568	33.2313	33.0067	31.6885	33.4525	33.2247	32.6116	31.7957	33.3189	32.6674	33.8077	32.2329	32.246	31.8737	32.5011	32.4891	31.5575	32.3331	31.6732	31.8089	31.5376	31.6404	31.2187	32.6094	32.1144	31.7856	31.1689	33.2579	32.0081	31.766	33.1574	33.0232	33.358	31.6882	32.4118	32.3067	32.8466	32.6635	32.6987	33.2662	32.2091	32.1145	32.5634	31.8038	33.8537
P27797	CALR_HUMAN	Calreticulin (CRP55) (Calregulin) (Endoplasmic reticulum resident protein 60) (ERp60) (HACBP) (grp60)	CALR CRTC	32	33.773	34.9069	34.1738	33.7986	34.4938	34.7964	34.6989	34.9227	34.7552	34.0038	34.3632	34.4237	34.2577	34.1438	34.5686	34.9911	34.1121	34.6792	33.9231	34.5302	34.4776	34.9582	34.4709	34.5076	34.5592	34.569	34.7983	34.6284	34.517	34.5792	34.4211	34.4006	34.8177	34.5668	34.2213	34.2974	34.5775	34.6322	34.0702	34.4276	34.3428	34.189	34.8059	34.6349	35.3202
O43852	CALU_HUMAN	Calumenin (Crocalbin) (IEF SSP 9302)	CALU	29	32.3338	33.98	32.6694	33.0539	34.477	33.4777	33.5448	33.5327	33.3657	33.0251	33.8305	33.1289	32.7984	32.4908	33.0233	33.2907	33.0869	33.1445	32.9417	33.2579	33.3501	33.3583	33.514	33.4121	33.4164	33.2328	33.3543	33.5051	33.0132	33.0996	33.2802	33.2196	33.6593	33.005	33.2168	33.3044	33.2885	33.3374	32.5514	33.1193	33.1407	32.9779	33.3944	33.2307	33.8091
P27824	CALX_HUMAN	Calnexin (IP90) (Major histocompatibility complex class I antigen-binding protein p88) (p90)	CANX	66	34.3598	35.7148	35.0129	34.7539	35.3222	35.509	35.6592	35.7687	35.5648	35.1182	35.0677	35.2908	35.0792	35.0187	35.4918	35.49	34.8441	35.3288	35.1013	35.301	35.2058	35.7336	35.6444	35.5909	35.571	35.2376	35.5957	35.8025	35.7835	35.3854	35.2735	35.3958	36.143	35.017	35.2309	35.1321	35.5559	35.4672	34.5774	35.4131	35.1521	34.8965	35.391	36.1846	36.2735
P49069	CAMLG_HUMAN	Calcium signal-modulating cyclophilin ligand (CAML)	CAMLG CAML	9	26.4208	27.1338	26.7986	26.8632	27.4827	27.252	27.2832	26.8864	27.3845	26.7949	26.998	26.8293	26.8291	26.6426	26.8861	26.9559	26.3214	26.8112	26.4863	26.6674	26.6284	26.6124	26.7656	26.7816	27.0063	26.7996	26.8105	27.1476	26.9404	26.7105	26.6088	26.832	27.6097	24.4919	25.5715	26.2153	27.2213	27.2498	26.2333	26.9268	26.9394	26.4144	27.027	27.1416	28.3774
P49913	CAMP_HUMAN	Cathelicidin antimicrobial peptide (18 kDa cationic antimicrobial protein) (CAP-18) (hCAP-18) [Cleaved into: Antibacterial peptide FALL-39 (FALL-39 peptide antibiotic); Antibacterial peptide LL-37]	CAMP CAP18 FALL39 HSD26	1	16.7505	20.0844	18.217	16.8537	18.0774	18.8981	17.4205	-0.29238	16.5592	19.5555	15.5245	18.3791	18.6648	16.8251	17.6069	16.9323	15.6036	19.1671	17.2061	-0.0626378	16.3456	0.0344352	15.8709	18.3681	15.7245	16.2406	0.491701	18.8121	17.2148	16.2753	18.2991	18.2287	18.8273	17.458	-0.25646	17.194	18.294	17.5249	16.5775	19.4581	18.8708	0.0776293	18.2731	20.3932	4.20668
Q5T5Y3	CAMP1_HUMAN	Calmodulin-regulated spectrin-associated protein 1	CAMSAP1	5	22.6717	21.8336	21.2127	23.026	23.9208	21.8	21.8483	22.5733	24.0598	22.17	21.9822	21.3506	21.7844	21.997	22.0916	21.6834	23.1313	19.392	23.674	23.0949	22.8714	23.3111	22.8882	21.2712	22.4077	23.7527	23.1843	22.3523	21.8044	23.159	22.6305	21.7985	21.8901	21.5672	22.0764	22.91	21.825	17.8165	21.5773	22.151	21.08	23.3505	21.4277	23.8105	26.145
Q08AD1	CAMP2_HUMAN	Calmodulin-regulated spectrin-associated protein 2 (Calmodulin-regulated spectrin-associated protein 1-like protein 1)	CAMSAP2 CAMSAP1L1 KIAA1078	1	17.4708	17.812	17.9185	18.9362	19.6858	17.6942	-0.37337	19.1623	19.0921	-0.565216	17.8451	17.3325	18.9941	0.860058	17.8859	0.0508134	19.6305	18.0657	20.0352	17.9121	19.3388	19.5404	18.0247	17.8464	17.1893	19.6042	19.718	18.7794	15.5345	18.7612	17.7245	18.7024	18.3838	16.5955	-0.25646	18.717	17.755	20.6315	-0.944079	-0.539827	-0.0519605	19.2567	18.6273	17.9587	19.6326
Q9P1Y5	CAMP3_HUMAN	Calmodulin-regulated spectrin-associated protein 3 (Protein Nezha)	CAMSAP3 KIAA1543	2	20.7407	21.919	21.2947	20.9175	20.396	21.6397	20.0676	21.9491	2.3194	22.1357	21.6449	20.3592	21.2722	21.2306	20.4193	21.3768	21.7195	18.3305	21.8646	22.2434	20.4813	21.4641	21.101	18.734	20.2752	21.8538	22.496	21.7614	17.9068	22.1561	20.8116	20.6558	20.5091	19.7113	21.4955	21.1099	19.9557	20.1351	21.0893	21.3268	19.754	21.1224	19.7455	20.3043	20.9021
P07384	CAN1_HUMAN	Calpain-1 catalytic subunit (EC 3.4.22.52) (Calcium-activated neutral proteinase 1) (CANP 1) (Calpain mu-type) (Calpain-1 large subunit) (Cell proliferation-inducing gene 30 protein) (Micromolar-calpain) (muCANP)	CAPN1 CANPL1 PIG30	15	27.2334	27.8984	27.0765	27.0233	26.4914	26.6153	26.795	25.9999	26.6062	26.7502	26.5677	27.1854	27.3944	27.622	27.2786	26.7056	26.9385	27.9132	26.1763	27.1795	26.7614	25.9903	26.7557	27.622	26.5332	26.0818	26.7021	27.5698	27.1328	25.7429	27.0378	27.2708	27.3452	27.3495	27.3471	27.0282	27.3639	27.2649	27.9395	27.0012	26.5365	26.5837	26.4482	26.7197	28.6487
P17655	CAN2_HUMAN	Calpain-2 catalytic subunit (EC 3.4.22.53) (Calcium-activated neutral proteinase 2) (CANP 2) (Calpain M-type) (Calpain large polypeptide L2) (Calpain-2 large subunit) (Millimolar-calpain) (M-calpain)	CAPN2 CANPL2	11	26.6489	26.1348	25.5302	24.9149	24.5795	25.8788	26.1357	25.5481	25.6283	25.2596	25.0102	25.705	25.9993	26.2974	25.6712	25.033	25.2102	25.7509	25.0379	25.1826	24.9622	24.9073	24.9266	25.4583	25.1554	25.3234	25.2317	25.5405	25.1185	24.3871	25.6711	25.6521	26.438	26.4942	25.6517	26.4425	26.6644	25.0074	27.384	26.2052	25.9673	25.8809	25.8153	24.1111	26.6784
O15484	CAN5_HUMAN	Calpain-5 (EC 3.4.22.-) (Calpain htra-3) (New calpain 3) (nCL-3)	CAPN5 NCL3	5	24.5238	24.5828	24.4009	24.1868	23.8204	24.3129	23.923	23.5425	23.6556	24.8064	23.8372	24.8653	24.5636	25.3017	25.0572	23.2847	24.4795	24.5865	25.0769	24.8851	24.3569	24.242	25.2442	25.1255	24.173	24.1861	25.2254	25.0474	24.6336	23.74	24.7445	24.8707	25.3556	24.8399	22.7903	24.7098	25.1721	23.9741	25.1667	23.8165	24.3631	23.89	23.488	24.0704	25.7464
Q9Y6W3	CAN7_HUMAN	Calpain-7 (EC 3.4.22.-) (PalB homolog) (PalBH)	CAPN7 PALBH	3	21.8645	23.3321	22.5916	22.3474	22.1188	22.6883	23.0875	22.9387	23.1825	22.7007	22.9282	23.1259	22.311	22.3282	22.9713	23.6139	24.203	23.5772	23.6962	23.46	24.2465	23.7064	23.7744	23.2855	23.9176	23.3293	24.4597	23.62	22.6186	23.2704	22.8089	23.2051	23.8675	22.8255	22.6144	23.166	23.0786	22.3228	22.9259	23.0681	22.1562	22.1928	22.9344	22.0174	21.7827
Q86VP6	CAND1_HUMAN	Cullin-associated NEDD8-dissociated protein 1 (Cullin-associated and neddylation-dissociated protein 1) (TBP-interacting protein of 120 kDa A) (TBP-interacting protein 120A) (p120 CAND1)	CAND1 KIAA0829 TIP120 TIP120A	24	28.8861	28.8914	28.3939	27.9142	26.9516	28.557	28.2689	27.2671	27.7687	28.4777	28.3117	28.3945	28.7699	28.6398	28.4019	28.0963	27.3172	28.036	27.4699	27.6315	27.4394	27.5308	27.4641	27.958	28.1626	27.8538	27.905	28.8848	27.4329	27.1768	28.5123	28.4263	28.5471	28.0768	28.3412	28.5632	28.998	27.791	29.2742	29.1822	27.9091	28.2688	28.5728	27.6354	30.2085
O75155	CAND2_HUMAN	Cullin-associated NEDD8-dissociated protein 2 (Cullin-associated and neddylation-dissociated protein 2) (Epididymis tissue protein Li 169) (TBP-interacting protein of 120 kDa B) (TBP-interacting protein 120B) (p120 CAND2)	CAND2 KIAA0667 TIP120B	19	25.6045	26.3444	25.7975	26.3795	26.7119	26.3909	26.3209	26.885	27.3607	25.897	25.9071	26.1925	26.25	25.2863	25.8614	25.5228	26.7699	25.5669	26.9999	27.0734	26.8305	27.0666	26.9265	25.5533	26.3615	27.2448	27.5222	26.4484	26.1409	27.0254	25.9484	25.703	26.3276	25.9246	26.7	26.7723	26.4916	25.5457	26.0556	26.2601	25.8941	26.8597	26.1127	25.4369	29.8289
Q8WVQ1	CANT1_HUMAN	Soluble calcium-activated nucleotidase 1 (SCAN-1) (EC 3.6.1.6) (Apyrase homolog) (Putative MAPK-activating protein PM09) (Putative NF-kappa-B-activating protein 107)	CANT1 SHAPY	4	23.4204	24.1602	24.4249	24.0968	23.7338	24.3251	24.7986	24.5361	24.7205	24.0112	24.0202	23.8036	23.3488	23.5152	23.446	23.3316	23.3944	23.2334	23.6732	24.1304	23.3028	23.675	24.6324	24.2832	23.5355	23.875	23.9371	23.1083	23.3296	24.0167	23.2986	22.9939	25.1313	24.1562	23.8344	24.0377	24.2376	23.7225	23.3294	24.1522	24.4772	23.895	24.013	24.2905	24.0655
Q01518	CAP1_HUMAN	Adenylyl cyclase-associated protein 1 (CAP 1)	CAP1 CAP	19	28.7373	28.6529	28.1913	27.4126	27.4597	28.5622	28.3539	27.6751	28.0907	28.1155	28.5822	28.2294	28.0446	28.771	28.2665	27.8161	27.3509	27.9415	27.289	27.6878	27.5731	27.7927	27.6127	28.1196	28.1995	27.8495	28.0356	29.1472	27.3339	27.6363	28.4714	28.4773	28.5268	28.6562	27.7981	28.7149	28.9615	27.7271	29.2447	29.1596	27.7689	28.4421	28.7051	27.6119	30.115
P40123	CAP2_HUMAN	Adenylyl cyclase-associated protein 2 (CAP 2)	CAP2	6	26.8793	29.4309	25.9877	25.7788	25.5593	26.209	25.7205	25.8967	26.5694	26.4578	25.7562	25.9729	25.8141	26.061	26.4852	25.5055	26.1572	26.2776	26.3483	26.7361	25.9267	26.2779	25.8291	26.5094	25.6223	26.1169	27.5614	26.9879	25.6093	26.363	25.797	26.1617	26.342	26.5616	25.4219	27.5626	26.7203	25.7037	26.8537	26.5796	25.4779	25.9725	25.8445	25.6236	27.2585
P20160	CAP7_HUMAN	Azurocidin (Cationic antimicrobial protein CAP37) (Heparin-binding protein) (HBP) (hHBP)	AZU1	1	21.4845	20.6187	20.0125	17.7496	17.0886	20.3531	18.9744	16.5471	20.2241	20.0441	15.6255	20.4425	19.7387	19.0585	17.9172	18.2843	18.6703	19.6306	19.5077	18.8206	18.9522	18.5777	19.4979	20.5826	19.5594	17.7812	18.0267	19.8412	19.7258	0.936853	18.4565	20.5834	20.3469	16.4564	18.7762	18.1985	19.3642	15.8571	20.1485	20.0996	20.0219	17.3117	19.3588	21.671	22.2857
Q9H4Z3	CAPAM_HUMAN	mRNA (2'-O-methyladenosine-N(6)-)-methyltransferase (EC 2.1.1.62) (Cap-specific adenosine methyltransferase) (CAPAM) (hCAPAM) (Phosphorylated CTD-interacting factor 1) (hPCIF1) (Protein phosphatase 1 regulatory subunit 121)	PCIF1 C20orf67 CAPAM PPP1R121	2	19.9108	21.1238	21.4734	19.7052	20.3443	22.6687	21.6933	20.6972	21.9588	21.3331	21.2615	21.923	22.2043	21.0241	22.1798	21.6648	21.8068	21.7039	20.722	21.8718	20.3618	21.7545	22.416	21.7253	22.3233	21.8771	22.1262	22.3813	21.9612	20.9549	21.9152	21.5222	22.7884	20.7837	21.1964	21.6392	22.1401	22.9113	20.7131	22.282	21.2358	21.2832	21.3624	23.06	24.8162
P40121	CAPG_HUMAN	Macrophage-capping protein (Actin regulatory protein CAP-G)	CAPG AFCP MCP	8	24.8524	24.4234	24.1458	23.569	23.6635	24.5303	24.7315	24.8783	25.2491	23.9897	23.4533	24.5036	24.5949	24.7293	24.3912	24.3796	24.4016	25.3519	25.5637	25.4659	24.2387	24.7558	25.0919	23.7615	24.4136	24.4874	24.4486	23.9946	24.0433	23.6569	23.9557	23.9884	24.5283	29.0207	24.7155	24.6008	25.0538	24.4214	25.9748	24.3399	24.6126	24.0367	24.279	23.9123	24.5791
Q14444	CAPR1_HUMAN	Caprin-1 (Cell cycle-associated protein 1) (Cytoplasmic activation- and proliferation-associated protein 1) (GPI-anchored membrane protein 1) (GPI-anchored protein p137) (GPI-p137) (p137GPI) (Membrane component chromosome 11 surface marker 1) (RNA granule protein 105)	CAPRIN1 GPIAP1 GPIP137 M11S1 RNG105	10	26.3135	26.5276	26.4466	26.6905	26.9775	26.5677	26.5169	26.8376	27.3354	26.5869	26.7399	26.4018	26.0849	26.4999	26.4289	26.5454	27.4801	26.3739	27.5696	26.8469	27.3458	27.416	26.7051	26.0889	26.4965	27.1608	27.0573	27.0539	25.774	26.6824	26.3085	26.3652	26.853	26.5083	25.9625	27.299	26.3791	26.4599	26.3932	26.3257	26.7219	27.1838	26.2301	26.039	27.7883
P47756	CAPZB_HUMAN	F-actin-capping protein subunit beta (CapZ beta)	CAPZB	8	28.5693	28.1654	28.0669	28.1566	27.8229	28.3179	28.4127	27.8583	28.5147	28.1393	28.2397	28.3165	28.7311	28.7374	28.4788	28.4374	27.5715	28.3177	27.9476	27.784	27.8811	28.3912	27.9139	28.0228	28.3743	27.9795	28.2572	29.2431	28.3595	28.3925	28.8543	28.4939	28.2892	28.5795	28.0695	27.8963	28.0893	28.5942	28.3527	28.7072	28.2779	28.0236	28.5175	28.4301	30.5255
Q9NXV6	CARF_HUMAN	CDKN2A-interacting protein (Collaborator of ARF)	CDKN2AIP CARF	2	24.056	24.4246	24.0295	24.33	24.7113	24.5666	24.6173	24.6345	25.0649	24.1464	24.4744	21.9764	22.6828	22.6199	22.2798	21.6874	21.1473	22.3096	21.1494	22.5309	21.6449	22.089	22.2792	22.4924	23.2777	22.1398	22.2791	23.0153	22.7621	23.1298	22.2903	22.9174	24.9662	24.6411	23.9956	24.2746	24.6855	24.6821	23.4942	24.5194	24.3967	23.9058	24.6866	22.7133	25.543
Q5VZK9	CARL1_HUMAN	F-actin-uncapping protein LRRC16A (CARMIL homolog) (Capping protein regulator and myosin 1 linker protein 1) (Capping protein, Arp2/3 and myosin-I linker homolog 1) (Capping protein, Arp2/3 and myosin-I linker protein 1) (Leucine-rich repeat-containing protein 16A)	CARMIL1 CARMIL LRRC16 LRRC16A	9	25.402	25.3754	25.5586	25.3668	24.5409	25.6575	24.7887	23.9991	24.8975	25.3265	24.8883	25.3876	26.1903	25.7674	25.1636	24.4292	24.5311	25.2873	24.4671	24.9337	24.6737	25.0675	24.5434	24.4712	24.6124	24.8127	25.2711	26.1832	24.3803	25.165	25.4107	25.2057	25.4382	24.2196	24.7008	24.4127	25.5151	24.9848	25.71	25.7784	24.9241	24.8797	25.3852	24.459	24.7781
Q6P4E1	CASC4_HUMAN	Protein GOLM2 (Cancer susceptibility candidate gene 4 protein) (CASC4) (Golgi membrane protein 2)	GOLM2 CASC4 UNQ2573/PRO6308	12	27.2733	28.298	28.3376	28.193	28.5802	28.082	28.6828	28.5061	28.4532	28.0229	28.2983	27.9417	28.1846	27.6718	27.7023	28.2424	28.0947	28.0398	28.2788	28.2435	28.2664	28.3721	28.5616	28.1964	28.0976	27.8136	28.4506	27.4969	28.1038	28.7669	27.5977	27.3576	28.7225	28.4276	28.328	28.0296	28.2523	28.1537	26.909	28.2141	28.2887	27.5975	27.9529	29.3686	30.211
Q13948	CASP_HUMAN	Protein CASP	CUX1 CUTL1	8	24.3002	24.2046	25.0988	24.7984	25.071	24.7489	25.3252	25.0608	25.9727	25.2453	25.1741	24.5979	24.43	24.4011	24.4645	24.7801	23.852	24.4466	24.4411	24.2908	24.8205	24.3377	24.9657	25.0892	24.5329	24.5035	24.0782	24.2392	24.5606	24.9842	24.4157	24.1231	25.3494	23.6912	24.6912	23.4888	24.6751	24.4634	23.9859	24.4868	24.5527	24.7443	24.7457	25.9122	26.5589
P31944	CASPE_HUMAN	Caspase-14 (CASP-14) (EC 3.4.22.-) [Cleaved into: Caspase-14 subunit p17, mature form; Caspase-14 subunit p10, mature form; Caspase-14 subunit p20, intermediate form; Caspase-14 subunit p8, intermediate form]	CASP14	2	20.4092	17.6281	21.034	18.397	16.3623	0.721834	17.3992	18.0227	19.1644	0.434784	19.7662	0.558969	19.7254	20.7748	15.2985	1.05081	17.3204	16.2127	20.016	16.7811	18.7936	20.0448	19.2102	17.4094	16.5196	16.5336	23.5208	17.6322	18.7786	16.914	1.1207	20.9748	17.7842	20.2707	0.74354	0.406137	0.362166	19.433	0.0559207	0.460173	20.4339	16.0469	16.7332	20.886	22.5448
P04040	CATA_HUMAN	Catalase (EC 1.11.1.6)	CAT	31	31.6171	33.4753	33.3868	31.969	32.6269	32.905	33.8274	32.6524	31.8568	33.1583	32.8613	32.1654	32.0513	31.862	32.2105	33.1755	31.8022	32.704	32.6188	32.1045	32.2405	32.4297	31.9656	32.9474	32.5207	32.2209	31.8034	31.2712	33.444	32.2524	32.7539	32.7108	33.5373	31.6585	32.8783	32.1372	32.6748	32.7604	32.2811	32.9614	32.4275	31.413	32.4391	32.676	33.3605
P07858	CATB_HUMAN	Cathepsin B (EC 3.4.22.1) (APP secretase) (APPS) (Cathepsin B1) [Cleaved into: Cathepsin B light chain; Cathepsin B heavy chain]	CTSB CPSB	15	29.7296	29.9672	30.1924	29.6726	30.4172	30.0284	30.1064	30.0008	30.4208	29.591	29.7031	29.7283	29.7443	29.8343	29.6426	29.6592	29.2312	29.9196	29.1158	29.8325	29.4812	29.4825	29.7387	30.2623	29.7466	29.4034	29.337	30.4535	29.472	29.8756	29.872	30.5518	31.0422	30.0417	29.8409	29.7679	30.2329	30.1014	29.788	30.6151	29.648	29.3995	29.8081	29.8439	31.588
P53634	CATC_HUMAN	Dipeptidyl peptidase 1 (EC 3.4.14.1) (Cathepsin C) (Cathepsin J) (Dipeptidyl peptidase I) (DPP-I) (DPPI) (Dipeptidyl transferase) [Cleaved into: Dipeptidyl peptidase 1 exclusion domain chain (Dipeptidyl peptidase I exclusion domain chain); Dipeptidyl peptidase 1 heavy chain (Dipeptidyl peptidase I heavy chain); Dipeptidyl peptidase 1 light chain (Dipeptidyl peptidase I light chain)]	CTSC CPPI	2	22.335	22.1611	21.8498	21.6476	22.124	22.1041	22.8171	22.1672	24.6179	23.5831	22.2782	23.0634	22.6598	23.981	21.6899	19.6419	21.2074	20.9759	21.8135	21.8906	22.0752	21.0328	21.4431	22.8298	22.0927	22.5424	22.1523	23.0009	22.5741	21.2829	22.1107	23.0693	24.0658	24.3729	21.3318	22.9066	24.2764	22.9474	23.1362	22.437	21.7863	22.2602	22.021	24.2101	22.6727
P07339	CATD_HUMAN	Cathepsin D (EC 3.4.23.5) [Cleaved into: Cathepsin D light chain; Cathepsin D heavy chain]	CTSD CPSD	24	35.0943	36.4872	36.1952	35.695	35.8179	36.1024	36.1864	36.2274	36.651	35.9179	35.9514	35.8715	35.3118	35.1763	35.7465	35.6279	34.8279	36.3109	35.4989	36.2467	35.2803	35.5576	35.7646	36.5994	35.483	35.1831	35.1024	36.4937	36.1457	36.2326	35.8435	36.8335	37.1614	35.3999	36.2686	35.7148	36.4037	36.082	35.8055	36.5611	35.7247	35.8569	35.9488	35.6294	37.2031
Q9UBX1	CATF_HUMAN	Cathepsin F (CATSF) (EC 3.4.22.41)	CTSF	4	23.1652	23.7998	23.7244	24.1788	23.1924	23.3296	23.848	23.3799	23.0922	23.6845	23.3859	22.8674	23.8724	23.4565	23.4531	23.5539	23.2696	23.7133	22.8087	23.9998	22.8688	23.1438	22.9468	23.0242	23.0213	23.0666	23.2118	23.8527	23.2682	23.6545	23.141	23.1154	23.5471	23.8386	23.631	22.9556	23.7346	24.4078	23.5394	23.1101	23.3578	23.9116	23.4631	22.6474	24.8564
P08311	CATG_HUMAN	Cathepsin G (CG) (EC 3.4.21.20)	CTSG	6	26.2004	25.9664	24.6581	22.1043	22.796	23.2624	23.7206	22.2466	24.1696	24.9361	22.3794	22.4525	23.5228	23.5738	21.401	22.5361	21.8075	23.4316	24.6975	22.1942	21.0325	21.1749	24.0645	24.6308	21.3467	22.7481	21.1079	23.1837	23.9989	22.191	24.0804	21.4202	22.8206	19.6965	22.7426	25.3912	22.3988	22.7515	25.04	22.5904	24.1716	21.8996	22.5411	27.403	25.1088
P09668	CATH_HUMAN	Pro-cathepsin H [Cleaved into: Cathepsin H mini chain; Cathepsin H (EC 3.4.22.16); Cathepsin H heavy chain; Cathepsin H light chain]	CTSH CPSB	2	23.2568	23.5687	23.4593	22.7565	23.6513	23.4043	23.6124	23.7381	23.6883	22.4455	23.0444	22.9373	23.0953	23.0714	22.4399	22.3907	22.1674	23.1468	22.5646	23.1544	22.0293	22.7998	23.0353	22.7123	22.5401	22.8108	23.042	24.0666	22.6341	23.2651	23.4432	22.8292	23.4752	24.6409	23.6225	22.6578	23.0525	23.5846	22.9606	23.9466	23.1447	23.0429	23.3028	22.7782	24.3765
P43235	CATK_HUMAN	Cathepsin K (EC 3.4.22.38) (Cathepsin O) (Cathepsin O2) (Cathepsin X)	CTSK CTSO CTSO2	4	24.8028	25.2555	25.1025	24.1574	25.4392	25.0269	25.0589	24.6301	25.8824	25.4615	25.6112	24.0883	24.6759	24.9928	23.7361	24.9028	24.1843	24.1978	23.7925	24.4159	24.0633	24.6521	24.9658	24.2635	24.3544	24.179	24.0641	24.766	25.3354	24.9791	25.1362	24.2252	25.7431	26.2794	24.9288	27.0114	24.3575	25.0428	24.9885	24.6126	24.7627	25.2998	24.7771	25.3922	26.8321
P07711	CATL1_HUMAN	Procathepsin L (EC 3.4.22.15) (Cathepsin L1) (Major excreted protein) (MEP) [Cleaved into: Cathepsin L; Cathepsin L heavy chain; Cathepsin L light chain]	CTSL CTSL1	2	22.2268	23.0109	23.0205	22.0105	24.2277	21.7069	21.2515	22.6057	22.3535	22.4527	24.5625	22.8651	21.9478	23.4156	22.1626	23.0772	21.4547	21.7096	21.3009	21.6078	22.3324	20.2552	21.0531	22.5045	23.0319	21.4637	16.5775	22.6409	21.77	21.8965	23.8433	23.9385	24.1374	22.3827	20.4568	19.7664	22.5909	22.7061	23.2329	22.3272	22.3224	21.8143	21.167	20.4225	20.8377
O60911	CATL2_HUMAN	Cathepsin L2 (EC 3.4.22.43) (Cathepsin U) (Cathepsin V)	CTSV CATL2 CTSL2 CTSU UNQ268/PRO305	1	16.4543	17.6954	19.8221	17.8351	16.51	18.0972	19.2397	18.9764	18.3565	18.4759	18.9494	19.4817	16.5125	0.860058	18.5881	18.7262	17.6791	21.1039	18.2229	19.8404	18.3068	15.2168	17.6532	18.1483	15.4356	16.8356	17.9089	17.8556	18.0189	15.3328	16.1514	18.8239	18.4804	19.9271	19.2677	18.0438	18.1858	18.7855	-0.944079	19.6739	18.1669	17.9102	17.9827	18.1209	4.20668
P25774	CATS_HUMAN	Cathepsin S (EC 3.4.22.27)	CTSS	2	19.341	19.1467	18.3086	16.7141	19.2821	19.2205	20.0159	17.3056	18.315	19.9523	15.5316	0.558969	17.6833	19.3956	18.189	17.3153	0.348282	0.762388	19.817	19.6449	18.6509	17.6209	19.1496	0.955979	1.24677	16.8777	16.7273	17.4149	17.6326	17.6074	15.699	19.1896	20.2735	25.8716	20.368	19.2473	19.2099	18.7999	19.1678	18.7578	16.1526	19.231	18.7795	17.2837	18.8105
Q9UBR2	CATZ_HUMAN	Cathepsin Z (EC 3.4.18.1) (Cathepsin P) (Cathepsin X)	CTSZ	5	25.6491	26.513	26.0024	24.9877	25.9473	25.1692	26.0754	25.7839	26.5189	25.3692	25.7954	25.4323	25.8049	25.561	25.5835	25.5563	24.8031	25.7928	25.0962	26.0063	25.7348	25.5771	25.786	26.0638	25.6554	25.0255	25.5016	26.6368	25.9101	26.0532	26.2781	26.3459	26.8661	26.6185	25.2591	25.2528	26.0425	26.1741	25.8051	25.957	25.229	24.9509	24.9681	25.3901	27.893
Q03135	CAV1_HUMAN	Caveolin-1	CAV1 CAV	2	21.8173	19.0442	17.7907	17.7654	20.4498	17.7374	17.7604	18.4028	18.1512	18.6416	20.6194	20.0816	18.4164	22.1444	17.3351	1.05081	18.0624	17.0818	21.3227	21.4985	17.5004	18.5144	19.7395	17.9715	14.6765	15.003	19.6009	15.1926	20.4096	19.9866	15.7319	16.5186	20.381	21.8053	19.5998	20.3382	21.6441	19.771	22.2463	16.6471	19.9865	18.6986	17.5254	18.9056	18.9846
Q6NZI2	CAVN1_HUMAN	Caveolae-associated protein 1 (Cavin-1) (Polymerase I and transcript release factor)	CAVIN1 PTRF FKSG13	2	24.7825	25.504	24.7373	23.7818	23.7631	25.2157	25.5084	23.9085	23.3279	25.2386	23.9263	24.3204	23.0906	24.1188	22.6559	23.3447	23.2537	23.7905	23.6992	24.4844	23.2475	23.3102	23.7839	24.0636	22.8482	23.2037	23.3245	23.3434	24.0176	23.3334	22.7832	24.2143	25.9883	24.4311	25.547	24.4399	25.8869	24.1499	25.8592	24.579	24.1923	23.3688	24.3885	22.8417	24.001
P52907	CAZA1_HUMAN	F-actin-capping protein subunit alpha-1 (CapZ alpha-1)	CAPZA1	11	27.8268	27.7655	27.3834	26.9852	26.9569	27.7278	27.6902	27.1609	27.1261	27.6978	27.2148	27.5018	27.7443	27.6225	27.5932	27.5698	26.9504	27.7843	26.8427	26.95	27.2026	27.3954	27.1281	27.0169	27.8302	27.2625	27.3169	28.0874	27.4505	27.1839	27.8547	27.9056	27.7471	28.1447	27.5333	27.5113	27.8345	27.2901	28.2116	28.0971	27.4642	27.036	27.9509	26.9639	29.6341
P47755	CAZA2_HUMAN	F-actin-capping protein subunit alpha-2 (CapZ alpha-2)	CAPZA2	15	28.9373	29.2534	28.8051	28.1591	27.6289	28.9275	29.0072	27.9767	28.1494	29.1004	28.4968	29.0021	28.9272	29.2307	29.1624	28.5996	27.8049	28.8343	28.1701	28.2034	27.9323	28.1619	28.1216	28.4306	28.7118	28.503	28.1331	29.8391	28.3546	28.1176	29.4249	29.2678	28.999	28.9525	28.3373	28.6332	29.2692	28.6552	29.7313	29.4491	28.5532	28.4272	29.084	28.2879	29.4556
A6NCS6	CB072_HUMAN	Uncharacterized protein C2orf72	C2orf72	3	22.5857	23.6964	22.3903	21.9687	21.8825	23.113	22.3967	22.5376	22.7637	23.1128	22.2693	23.0322	22.5439	21.8291	22.465	22.7338	22.1426	23.137	21.4722	21.3606	22.7506	21.5736	21.7405	23.6691	21.9603	21.5434	22.4333	21.8335	22.7233	22.4014	23.618	22.8695	22.5547	21.1407	22.695	23.3452	22.7447	21.9297	22.1297	23.757	22.098	23.3131	22.4256	21.8053	19.6837
Q9H9S4	CB39L_HUMAN	Calcium-binding protein 39-like (Antigen MLAA-34) (MO25beta) (Mo25-like protein)	CAB39L	1	20.1032	19.6654	18.2827	17.4396	18.3894	17.7878	19.0311	19.2221	19.3158	19.4371	20.0488	19.5066	18.8168	20.7788	19.6592	19.2136	16.9237	18.437	17.8326	18.77	17.4202	19.1066	19.2347	20.2683	19.1827	19.4982	19.2489	20.9679	18.7467	18.5966	19.2462	20.3209	20.3849	17.0262	19.8986	19.2154	20.9593	18.6433	21.4051	20.7649	16.5935	20.4161	21.1241	16.7487	18.2735
Q96IY4	CBPB2_HUMAN	Carboxypeptidase B2 (EC 3.4.17.20) (Carboxypeptidase U) (CPU) (Plasma carboxypeptidase B) (pCPB) (Thrombin-activable fibrinolysis inhibitor) (TAFI)	CPB2	9	24.6297	24.5052	25.823	26.6045	23.6664	23.9974	24.7746	24.2119	24.6356	24.6941	24.1238	23.9201	25.8855	23.9182	25.1733	24.4572	25.5865	25.2387	23.314	27.1808	23.9198	24.4505	25.3176	24.7926	24.0104	23.5652	23.8614	24.2033	27.2969	23.6257	24.2053	25.0496	24.5838	25.923	24.7785	24.2288	24.423	25.7072	24.5433	24.389	24.4546	25.6643	24.5818	23.909	26.9914
Q9UPW5	CBPC1_HUMAN	Cytosolic carboxypeptidase 1 (EC 3.4.17.-) (ATP/GTP-binding protein 1) (Nervous system nuclear protein induced by axotomy protein 1 homolog)	AGTPBP1 CCP1 KIAA1035 NNA1	2	19.1528	19.7456	21.0468	20.8976	18.7244	20.9927	20.4815	21.2669	20.0591	21.1517	18.8683	18.7306	19.8723	19.3804	19.2006	18.3456	20.8254	19.0697	20.505	19.8705	19.9938	21.5027	20.1761	18.9433	19.4268	21.0223	20.5924	19.0278	19.0381	19.4212	19.2508	19.6877	20.3108	21.0942	21.231	20.0544	19.6992	17.5015	20.7028	18.7092	20.5756	21.7057	20.7693	18.9973	16.3294
O75976	CBPD_HUMAN	Carboxypeptidase D (EC 3.4.17.22) (Metallocarboxypeptidase D) (gp180)	CPD	18	26.7288	27.3837	26.6431	26.6822	26.4617	27.4357	27.6386	27.3555	27.6272	27.3665	27.0889	27.0805	26.8626	26.8441	27.0626	27.2835	26.7801	27.3752	27.1339	26.7997	27.1171	26.9207	26.8902	27.2627	26.8955	27.0096	27.1115	26.9371	26.912	27.3402	26.8471	27.1087	28.0541	27.2958	27.1782	26.5644	27.2767	26.9905	26.4939	26.8431	26.9756	26.6978	27.3763	27.3441	28.0965
P16870	CBPE_HUMAN	Carboxypeptidase E (CPE) (EC 3.4.17.10) (Carboxypeptidase H) (CPH) (Enkephalin convertase) (Prohormone-processing carboxypeptidase)	CPE	6	25.8024	27.7517	27.1972	25.5492	26.6208	27.1915	26.2623	26.4583	26.1708	27.134	27.3521	27.0144	26.6586	26.6298	26.7687	26.4783	26.2367	26.9787	26.4684	26.5925	26.7002	25.8235	26.1539	27.1319	26.7947	26.5424	25.6193	26.7985	26.6224	24.6705	27.3558	26.8432	27.9548	26.1906	26.9295	26.3342	27.1113	25.9429	26.8786	26.9654	25.2505	25.4521	26.7396	26.7662	24.7457
P14384	CBPM_HUMAN	Carboxypeptidase M (CPM) (EC 3.4.17.12)	CPM	8	23.7544	23.9929	23.3757	23.2506	23.2505	23.6203	23.3979	23.9887	23.5578	23.664	23.4854	23.505	23.9188	23.7693	23.4636	23.0188	23.237	24.8021	24.1406	24.7659	23.2743	23.5907	24.0122	24.1442	22.695	22.6507	23.0739	24.9063	24.3459	23.3189	23.3145	24.0467	23.351	28.7595	23.8926	23.5316	24.2936	24.5544	24.0121	23.2748	23.4273	24.5318	23.3952	23.4804	25.9569
Q9Y646	CBPQ_HUMAN	Carboxypeptidase Q (EC 3.4.17.-) (Lysosomal dipeptidase) (Plasma glutamate carboxypeptidase)	CPQ LCH1 PGCP	10	28.476	29.6252	29.1916	27.9139	29.2372	28.1311	28.3147	28.4082	29.3452	28.9468	28.9396	28.7384	28.3369	28.7938	28.3881	28.3915	27.5121	27.6843	28.0456	28.3269	28.5821	28.0838	28.6084	29.0597	28.973	28.3799	27.9633	29.9961	29.0087	28.2431	29.5989	29.7832	30.199	26.0767	29.3597	28.4851	29.1312	28.7084	28.9942	28.9189	27.4115	28.0349	28.0283	28.4312	29.2914
P16152	CBR1_HUMAN	Carbonyl reductase [NADPH] 1 (EC 1.1.1.184) (15-hydroxyprostaglandin dehydrogenase [NADP(+)]) (EC 1.1.1.196) (EC 1.1.1.197) (20-beta-hydroxysteroid dehydrogenase) (NADPH-dependent carbonyl reductase 1) (Prostaglandin 9-ketoreductase) (PG-9-KR) (Prostaglandin-E(2) 9-reductase) (EC 1.1.1.189) (Short chain dehydrogenase/reductase family 21C member 1)	CBR1 CBR CRN SDR21C1	11	29.19	30.4508	29.1468	29.2808	28.7962	29.6005	29.2896	28.5535	28.5883	29.0573	29.2926	29.3661	29.032	29.0338	29.684	28.9052	28.4376	29.2728	28.6221	28.5032	28.2272	28.9171	28.0538	28.6902	29.1833	28.7999	29.7135	29.4553	28.7049	28.2627	29.4776	29.2352	29.7166	29.4935	29.1064	29.1872	29.3954	28.833	30.0183	29.7487	28.4442	29.578	29.412	28.2721	30.0746
O75828	CBR3_HUMAN	Carbonyl reductase [NADPH] 3 (EC 1.1.1.184) (NADPH-dependent carbonyl reductase 3) (Short chain dehydrogenase/reductase family 21C member 2)	CBR3	3	27.1474	28.3436	26.8281	27.3164	26.1849	27.3834	26.7365	26.3108	26.1588	26.6371	26.7806	27.2396	26.5219	26.7616	27.5521	26.4849	26.2363	26.9346	26.5068	26.3889	25.9381	26.8031	25.8184	26.1734	26.8275	26.5401	27.6625	27.2031	26.3061	25.9295	27.2965	27.0345	27.4225	27.1445	26.6	27.0184	27.0098	26.5561	28.0583	27.6532	26.0278	27.3051	27.1097	25.6929	27.7782
Q8N4T8	CBR4_HUMAN	Carbonyl reductase family member 4 (EC 1.-.-.-) (3-ketoacyl-[acyl-carrier-protein] reductase beta subunit) (KAR beta subunit) (3-oxoacyl-[acyl-carrier-protein] reductase) (EC 1.1.1.-) (Quinone reductase CBR4) (Short chain dehydrogenase/reductase family 45C member 1)	CBR4 SDR45C1	8	27.3765	29.132	29.1228	27.5255	27.5084	29.0834	29.2627	26.7619	27.7614	29.3168	28.1472	28.5276	28.0349	27.7495	27.6178	28.3669	27.3976	28.3252	27.0803	27.2774	27.4977	27.2279	27.3587	28.5462	27.2947	27.5691	27.3503	28.3036	28.0432	26.8106	28.056	28.1704	29.4289	27.2618	29.1138	27.1587	28.6898	28.6374	28.1421	28.3287	28.0172	27.1902	27.8811	28.0466	29.2683
Q9BRT8	CBWD1_HUMAN	COBW domain-containing protein 1 (Cobalamin synthase W domain-containing protein 1) (COBP) (NPC-A-6 COBW domain-containing protein 1) (NPC-A-6)	CBWD1	2	20.8581	21.967	21.6827	23.2818	23.3404	22.2353	22.8922	23.4713	24.2573	22.3048	22.4124	22.4796	21.3007	21.7292	23.0222	22.3568	23.7445	22.0441	23.4508	23.3423	23.4855	22.8723	23.8506	23.1174	22.8665	23.4566	23.0506	22.9144	22.098	23.2799	21.2641	21.934	22.8282	22.8417	22.9515	22.7891	23.2126	22.1557	21.6667	22.6359	22.2112	23.4951	22.2166	23.1442	20.9716
Q13185	CBX3_HUMAN	Chromobox protein homolog 3 (HECH) (Heterochromatin protein 1 homolog gamma) (HP1 gamma) (Modifier 2 protein)	CBX3	2	23.8559	24.4301	24.2858	23.9596	24.0994	23.9217	24.6746	23.849	25.0362	24.7046	24.3548	23.7093	24.2314	24.042	23.7418	24.2953	23.6614	23.5513	23.9735	23.8786	24.1295	24.2863	24.1612	24.1096	24.2676	24.1095	24.3265	23.9401	24.18	24.1334	23.9513	24.0354	24.9229	23.3542	24.4731	23.6033	24.0282	24.1224	23.8193	23.9929	24.3408	23.8582	24.1759	24.4954	24.2917
P45973	CBX5_HUMAN	Chromobox protein homolog 5 (Antigen p25) (Heterochromatin protein 1 homolog alpha) (HP1 alpha)	CBX5 HP1A	2	21.4815	20.2586	21.647	20.1949	21.8915	21.9966	21.6055	21.0395	21.1494	21.9146	22.6309	21.3997	21.7946	21.662	21.2996	20.9869	20.49	21.2976	20.7466	19.1979	19.9453	20.0178	20.9889	20.8502	21.4028	21.084	20.9721	21.2065	20.5495	20.8374	20.8551	21.4157	23.3786	20.3405	19.5366	21.0996	21.3552	21.3798	21.0224	22.0783	21.7056	19.9589	21.7433	20.9225	21.957
Q6P1S2	CC033_HUMAN	Protein C3orf33 (Protein AC3-33)	C3orf33 MSTP052	7	24.474	25.9062	26.031	25.5596	25.1996	25.0636	26.4027	24.8581	25.7003	26.1098	25.2219	25.8682	25.7789	25.2039	25.6459	25.388	25.3541	25.8091	25.0836	24.8947	25.5231	24.7024	24.8197	25.9821	25.231	25.1024	24.9885	25.7032	25.7626	25.2525	25.4854	25.1968	26.661	25.1029	26.3854	24.4382	26.0161	25.6425	25.2467	26.1349	25.5873	25.2382	24.4757	25.7622	27.7725
Q96CT7	CC124_HUMAN	Coiled-coil domain-containing protein 124	CCDC124	3	21.8746	22.2305	22.1491	21.2609	21.8066	22.0725	20.8311	20.0702	19.2898	23.3374	23.2317	22.8338	21.3269	21.1812	23.1345	22.4579	21.052	22.3378	21.0557	21.6559	20.8745	20.2377	19.5731	20.6355	22.4955	21.1497	20.0699	23.6214	20.5152	20.4184	22.5345	22.0644	20.9916	18.1841	20.4358	18.579	20.4272	19.5051	20.4598	21.6757	20.7038	19.57	21.4178	19.9166	21.8581
Q96BQ5	CC127_HUMAN	Coiled-coil domain-containing protein 127	CCDC127	10	25.5564	27.3593	27.4561	26.474	26.7319	27.6412	28.1995	26.5369	27.6463	27.5463	27.311	27.6058	27.2022	26.9053	27.0789	27.7221	26.9551	27.6598	26.9904	26.9876	27.0277	26.9835	26.5784	27.6912	27.0014	27.2578	26.0331	26.9633	27.8297	26.9129	27.2209	27.1121	27.8768	26.8104	28.3104	26.0314	27.5308	27.3282	26.4565	26.9733	27.0222	26.8225	26.8054	27.08	28.4291
Q9H6E4	CC134_HUMAN	Coiled-coil domain-containing protein 134	CCDC134	3	24.6907	25.1084	24.617	24.4563	24.2142	25.2486	24.9819	25.35	25.6408	24.9341	24.499	24.5489	24.5797	24.3099	24.8152	25.3864	24.3513	24.8653	24.3736	24.482	24.6694	25.1356	24.4065	24.3073	24.8911	24.7914	25.1807	24.8812	24.4966	24.8864	24.826	24.4537	25.1774	24.5835	25.1593	24.7919	24.7246	24.9881	24.7699	25.2419	24.3513	24.4446	25.1687	25.2653	26.8476
Q9P1Z9	CC180_HUMAN	Coiled-coil domain-containing protein 180	CCDC180 C9orf174 KIAA1529	1	20.48	21.1623	20.5529	20.4155	19.194	21.8663	20.2347	19.4604	18.3151	21.5521	21.2786	20.8578	21.6366	19.2549	21.4417	21.0457	19.5656	19.9024	20.5765	16.5379	20.1751	19.439	18.1319	20.5599	0.246775	20.3606	18.0681	22.357	19.9062	18.6413	21.4264	21.2597	22.0628	16.847	19.7781	16.3202	19.9468	19.3181	20.6844	19.6849	19.6618	19.5438	21.8421	20.3841	4.20668
Q5TID7	CC181_HUMAN	Coiled-coil domain-containing protein 181	CCDC181 C1orf114	1	19.732	20.8115	19.6786	20.2645	22.2991	19.8903	20.5925	20.3186	20.6859	20.3372	21.3833	18.1002	20.667	21.9827	19.8473	19.7224	18.2454	18.3208	19.7594	19.1197	18.6944	18.9905	19.694	20.7143	20.998	19.8273	19.2588	16.8534	21.7928	21.4547	19.4871	20.4086	20.8009	20.8672	20.1768	16.4313	20.0332	22.436	18.8874	19.8316	20.2955	20.6558	20.8342	20.3804	17.7013
Q7Z3E2	CC186_HUMAN	Coiled-coil domain-containing protein 186 (CTCL tumor antigen HD-CL-01/L14-2)	CCDC186 C10orf118	2	21.4446	21.1981	21.0924	20.4114	21.8742	21.5634	21.4232	22.0861	22.4677	20.9257	21.5186	19.5599	20.8929	18.6753	20.8732	21.3952	21.5895	20.6899	21.2267	21.399	21.4319	21.8914	21.3045	19.4448	20.7719	21.9587	21.5818	21.3096	18.2583	21.9584	21.0823	20.1695	19.8645	20.4822	20.9563	19.4991	20.777	21.0424	21.3744	21.6366	20.5745	21.8849	20.369	19.8038	16.9223
Q8NCU4	CC191_HUMAN	Coiled-coil domain-containing protein 191	CCDC191 KIAA1407	1	24.15	23.5115	23.4965	23.7954	23.9575	23.8303	24.2841	23.0321	22.2221	24.3181	23.8863	23.7647	23.8631	23.6273	23.7657	23.6461	23.9827	24.2297	24.0033	23.6809	23.9074	24.1214	23.8628	23.49	23.6543	23.6499	23.8547	24.114	23.4691	23.0439	23.6216	24.0041	23.6692	25.065	23.9612	24.2473	23.3098	23.8199	23.8967	23.487	24.5725	23.0157	23.596	24.6435	21.3225
Q8IWP9	CC28A_HUMAN	Coiled-coil domain-containing protein 28A (CCRL1AP)	CCDC28A C6orf80	5	25.8735	26.0767	26.0026	25.3803	25.7391	26.5646	27.0024	25.838	25.9878	26.5893	24.8545	25.7838	25.8398	25.8874	25.878	25.2674	25.1494	25.7614	25.149	25.4125	25.3757	25.9234	25.1198	25.1948	25.6191	25.6378	25.6268	25.6943	24.8513	25.7477	25.8538	26.1519	26.2717	24.0923	25.8975	26.1306	26.1398	25.5336	25.6022	26.1235	25.9787	25.6363	26.2065	24.7293	27.1711
[truncated: 5,179 more rows]
[truncated: 32 more columns]
