# Supplementary material for: Quantitative Proteomics of Human Retinal Pigment Epithelium Reveals Key Regulators for the Pathogenesis of Age-Related Macular Degeneration
Source: Int J Mol Sci. 2023 Feb 7;24(4):3252. doi: 10.3390/ijms24043252 (PMC9959910; doi:10.3390/ijms24043252)
Supplement: Supplementary file 1 [file ijms-24-03252-s001.zip › Table S3.xlsx]

## Sheet: Table S3
Table S3. Proteomic quantification results of the 5 QC sample runs.
ProteinAC	ProteinID	Peptide #	QC_01	QC_02	QC_03	QC_04	QC_05
P31946	1433B_HUMAN	11	29.8657	30.1162	29.6447	29.9109	29.8789
P62258	1433E_HUMAN	18	31.122	31.1643	30.9361	31.0656	31.0585
Q04917	1433F_HUMAN	8	29.9075	29.9275	29.521	29.7496	29.7291
P61981	1433G_HUMAN	9	30.3337	30.1565	29.9093	30.1343	30.0359
P31947	1433S_HUMAN	2	29.8272	29.8167	29.3464	29.5925	29.5756
P27348	1433T_HUMAN	11	28.192	28.4999	28.5694	28.6132	28.5923
P63104	1433Z_HUMAN	14	30.743	30.5465	30.3271	30.4456	30.3938
Q15172	2A5A_HUMAN	2	23.6596	23.5265	23.679	23.8759	23.52
Q14738	2A5D_HUMAN	5	25.7945	25.2134	24.9977	25.1624	25.2901
Q16537	2A5E_HUMAN	2	22.269	22.0777	21.7739	22.4551	22.224
Q13362	2A5G_HUMAN	2	22.2557	22.37	22.1056	21.6798	22.4102
P30153	2AAA_HUMAN	16	29.0074	29.3783	29.2636	29.1537	29.4094
P30154	2AAB_HUMAN	4	26.558	26.4789	26.5499	26.0809	26.4205
P63151	2ABA_HUMAN	3	23.9106	24.341	24.1979	24.1089	24.259
Q00005	2ABB_HUMAN	2	23.7557	23.6005	23.6341	23.2785	23.3321
Q66LE6	2ABD_HUMAN	3	24.2027	24.0898	24.0679	23.8551	23.9187
P31937	3HIDH_HUMAN	13	30.9519	31.1958	31.1854	31.3689	31.2949
P11171	41_HUMAN	12	26.5115	26.4799	26.3931	26.1835	26.2899
Q13542	4EBP2_HUMAN	2	23.9294	23.9013	23.7702	23.2625	23.399
P08195	4F2_HUMAN	30	33.7806	33.8073	33.6806	33.8173	33.7411
Q9H0P0	5NT3A_HUMAN	3	24.4165	23.5131	23.8583	23.8074	23.7519
P21589	5NTD_HUMAN	2	22.9124	23.0402	22.7194	22.5108	22.8563
P52209	6PGD_HUMAN	13	29.2436	28.976	29.0226	29.0736	28.9484
O95336	6PGL_HUMAN	7	26.952	26.7354	26.7703	26.9811	26.997
Q8IZ83	A16A1_HUMAN	2	23.7635	24.2261	24.366	24.5789	24.5227
P02763	A1AG1_HUMAN	3	23.8558	23.7557	23.4717	23.7891	23.5575
P19652	A1AG2_HUMAN	2	23.0785	22.8786	22.7053	23.0625	22.8501
P01009	A1AT_HUMAN	14	28.055	28.1678	28.2075	28.2358	28.318
P04217	A1BG_HUMAN	4	25.8411	25.9451	25.7214	25.582	25.7536
P01023	A2MG_HUMAN	14	26.4943	26.4164	26.3224	26.1613	26.182
P05067	A4_HUMAN	14	27.6385	27.7201	27.9364	27.9473	27.9046
Q9NS82	AAA1_HUMAN	2	26.0507	26.2829	26.6769	26.7702	26.7392
Q9NRG9	AAAS_HUMAN	8	25.8243	25.5571	25.59	25.7426	25.4414
P01011	AACT_HUMAN	6	26.515	26.236	26.3273	26.3349	26.3658
Q8N5Z0	AADAT_HUMAN	2	23.2938	22.9756	22.8177	23.25	22.9094
Q2M2I8	AAK1_HUMAN	2	24.6585	24.1697	24.1758	24.5441	24.0553
Q9Y478	AAKB1_HUMAN	2	24.0359	22.9338	23.7067	23.3269	23.862
P54619	AAKG1_HUMAN	3	24.6915	24.6957	24.4945	24.9171	24.7826
Q13131	AAPK1_HUMAN	9	26.7515	26.7471	26.6545	26.5771	26.6349
Q9UDR5	AASS_HUMAN	17	28.0158	27.879	27.84	27.8689	27.8529
P17174	AATC_HUMAN	14	28.3398	28.3181	28.2626	28.1004	28.2831
P00505	AATM_HUMAN	27	34.3757	34.6213	34.612	34.6912	34.6748
Q5VST6	AB17B_HUMAN	3	23.1426	23.128	22.8559	22.8765	22.8642
O95477	ABCA1_HUMAN	4	25.8636	24.5918	24.5558	24.7004	24.3048
Q9BZC7	ABCA2_HUMAN	42	30.2444	30.1484	30.2337	30.3026	30.3099
P78363	ABCA4_HUMAN	55	30.5807	30.7784	30.7972	30.8283	30.8541
Q8WWZ7	ABCA5_HUMAN	7	26.287	26.2842	26.4038	26.3601	26.5002
Q8IZY2	ABCA7_HUMAN	7	25.8834	25.4275	25.4407	25.5329	25.4562
Q9NP58	ABCB6_HUMAN	7	26.8298	26.983	26.7479	26.6756	26.7132
O75027	ABCB7_HUMAN	14	28.4309	28.2621	28.6072	28.6398	28.5843
Q9NRK6	ABCBA_HUMAN	6	26.2725	26.3546	26.2822	26.4724	26.5165
O60706	ABCC9_HUMAN	8	25.6161	25.6546	25.6058	25.6552	25.6942
Q96J66	ABCCB_HUMAN	2	23.7669	23.2102	22.8497	22.857	22.4337
P33897	ABCD1_HUMAN	6	26.5063	26.3501	26.2873	26.4581	26.3244
P28288	ABCD3_HUMAN	30	32.2269	32.4776	32.477	32.596	32.681
P61221	ABCE1_HUMAN	6	25.4492	25.2042	24.952	25.0458	25.0517
Q8NE71	ABCF1_HUMAN	7	24.7116	24.4894	24.3151	24.5025	24.4439
Q9UG63	ABCF2_HUMAN	4	25.0189	24.6729	24.96	25.1225	25.1139
Q9NUQ8	ABCF3_HUMAN	5	26.7373	26.6524	27.0998	26.4065	26.6691
Q8N2K0	ABD12_HUMAN	8	27.3018	27.2707	26.9646	26.9637	26.999
P08910	ABHD2_HUMAN	2	22.6564	22.1407	22.7634	22.4287	21.5312
Q8WU67	ABHD3_HUMAN	5	26.0482	26.0875	26.1139	25.9907	26.1391
Q9BV23	ABHD6_HUMAN	11	28.0167	28.0497	27.9454	27.8743	27.9516
Q9NUJ1	ABHDA_HUMAN	12	29.0711	29.1468	29.2127	29.3301	29.3058
Q8NFV4	ABHDB_HUMAN	7	26.3439	26.7519	26.6354	26.4686	26.6586
Q96IU4	ABHEB_HUMAN	5	28.3412	28.3743	28.5192	28.4356	28.4769
O95870	ABHGA_HUMAN	15	29.2837	29.4319	29.3926	29.6532	29.5602
Q8IZP0	ABI1_HUMAN	6	26.9605	26.9723	27.1056	27.1146	27.065
Q9NYB9	ABI2_HUMAN	2	24.2917	24.5811	24.5128	24.7282	24.5851
O14639	ABLM1_HUMAN	7	24.7863	24.5212	24.5299	24.5634	24.5015
Q12979	ABR_HUMAN	4	27.4506	27.208	27.1875	27.0852	27.159
Q13085	ACACA_HUMAN	33	28.4515	28.2987	28.2593	28.2803	28.3525
O00763	ACACB_HUMAN	4	26.1746	25.8674	26.1733	26.2748	26.0261
Q9UKU7	ACAD8_HUMAN	15	28.723	29.0604	29.0955	29.199	29.0508
Q9H845	ACAD9_HUMAN	20	28.5152	28.506	28.3899	28.4183	28.4149
P11310	ACADM_HUMAN	15	30.484	30.5405	30.5162	30.5921	30.5895
P16219	ACADS_HUMAN	9	27.5204	28.1637	28.0836	28.0488	28.1918
P49748	ACADV_HUMAN	38	33.5966	33.819	33.62	33.709	33.7531
O00400	ACATN_HUMAN	7	27.8838	27.8939	28.0769	28.1999	28.0192
Q5T8D3	ACBD5_HUMAN	14	29.5753	29.2073	29.2713	29.449	29.3358
P07108	ACBP_HUMAN	5	27.8997	28.4587	28.3947	28.5354	28.5288
Q6JQN1	ACD10_HUMAN	5	23.6841	23.718	23.2383	23.1042	23.5128
Q709F0	ACD11_HUMAN	17	29.3447	29.4882	29.3455	29.5087	29.5286
P45954	ACDSB_HUMAN	15	28.8564	28.7954	28.9891	28.9677	28.9958
P32297	ACHA3_HUMAN	6	26.8691	26.8454	26.7161	26.7937	26.7917
Q9UKV3	ACINU_HUMAN	2	22.0132	21.0554	21.6212	21.7814	21.2819
Q6P4H8	ACKMT_HUMAN	1	21.0543	21.575	21.6207	21.6127	21.2119
O96019	ACL6A_HUMAN	2	23.4091	23.7545	23.2606	23.0359	23.5606
P53396	ACLY_HUMAN	6	25.3153	25.1499	24.8679	24.7811	25.1313
Q8WXI4	ACO11_HUMAN	13	27.9613	27.7458	27.8612	27.9025	27.9061
Q9NPJ3	ACO13_HUMAN	3	26.2997	26.487	26.6092	26.4677	26.5404
P21399	ACOC_HUMAN	21	28.2909	28.3311	28.0459	28.0468	28.1165
O00767	ACOD_HUMAN	3	25.2911	25.1971	24.6276	24.8974	24.7409
Q99798	ACON_HUMAN	36	32.6465	32.7653	32.7327	32.8118	32.7694
Q86TX2	ACOT1_HUMAN	10	28.1129	28.3117	28.2369	28.2785	28.2667
O14734	ACOT8_HUMAN	8	28.9862	28.9256	28.6898	29.0616	28.8885
Q9Y305	ACOT9_HUMAN	19	28.1694	28.217	28.2181	28.1612	28.2983
Q15067	ACOX1_HUMAN	19	31.0689	31.3575	31.0324	30.9993	31.1674
Q99424	ACOX2_HUMAN	20	29.4434	29.6541	29.5221	29.676	29.7046
O15254	ACOX3_HUMAN	16	28.6675	28.9134	28.6357	28.5391	28.719
P13798	ACPH_HUMAN	5	26.3562	26.5389	26.1351	26.3231	26.3888
O14561	ACPM_HUMAN	5	29.2399	30.0949	29.6165	29.1002	29.7275
Q9NUB1	ACS2L_HUMAN	10	27.2476	27.0351	27.0701	27.1587	27.1343
Q96CM8	ACSF2_HUMAN	7	25.1591	25.0643	24.9243	24.8638	24.815
Q4G176	ACSF3_HUMAN	9	26.2097	26.2884	26.089	26.2069	26.2278
P33121	ACSL1_HUMAN	37	32.247	32.3236	32.2801	32.4438	32.441
O95573	ACSL3_HUMAN	24	29.4965	29.5091	29.3519	29.2636	29.3125
O60488	ACSL4_HUMAN	3	25.3451	24.6525	24.8626	24.6159	24.5508
Q9ULC5	ACSL5_HUMAN	30	33.3989	33.5729	33.6135	33.619	33.689
Q9UKU0	ACSL6_HUMAN	28	30.2528	30.1864	30.1716	30.2103	30.1419
Q9H6R3	ACSS3_HUMAN	12	27.0771	27.4661	27.2802	27.2869	27.4184
P62736	ACTA_HUMAN	11	35.5572	35.7256	35.6731	35.9284	35.9323
P60709	ACTB_HUMAN	19	36.1084	36.1336	36.1329	36.2589	36.2104
Q562R1	ACTBL_HUMAN	7	34.2558	34.494	34.4266	34.7293	34.7761
Q9BYX7	ACTBM_HUMAN	5	34.171	34.4512	34.2926	34.6125	34.6636
P63261	ACTG_HUMAN	19	36.0592	36.132	36.1324	36.255	36.2246
P63267	ACTH_HUMAN	9	35.5454	35.7152	35.6456	35.8999	35.9037
P12814	ACTN1_HUMAN	44	31.0717	31.2129	31.0225	31.0863	31.0343
P35609	ACTN2_HUMAN	12	29.2095	29.1196	28.9723	29.142	29.0785
Q08043	ACTN3_HUMAN	9	28.9159	28.8666	28.7536	28.9535	28.9008
O43707	ACTN4_HUMAN	48	31.9711	32.0172	31.9188	31.9816	31.9266
P68133	ACTS_HUMAN	11	35.6591	35.81	35.7809	36.0277	36.0223
P42025	ACTY_HUMAN	5	25.7429	25.7588	25.4855	25.3845	25.5232
P61163	ACTZ_HUMAN	5	27.1305	26.9129	26.7003	26.4391	26.5783
Q04771	ACVR1_HUMAN	1	23.5394	23.8744	23.8711	24.0794	24.3134
Q03154	ACY1_HUMAN	5	27.1745	27.2211	27.1512	27.2641	27.2169
P45381	ACY2_HUMAN	2	24.6875	24.0285	23.8913	23.941	24.034
P14621	ACYP2_HUMAN	2	24.0102	24.1527	24.3271	24.5663	24.4365
O14672	ADA10_HUMAN	11	27.3912	27.4451	27.577	27.7576	27.6122
P78536	ADA17_HUMAN	5	24.7783	25.2885	25.2831	25.3107	25.3255
Q13443	ADAM9_HUMAN	7	26.6956	26.4754	26.522	26.5614	26.6395
O00116	ADAS_HUMAN	18	28.6685	28.803	28.5748	28.4842	28.6455
Q86TW2	ADCK1_HUMAN	10	27.6912	27.5743	27.4481	27.2633	27.406
O43306	ADCY6_HUMAN	3	24.3974	23.9856	23.7405	23.2649	23.4536
O60503	ADCY9_HUMAN	12	26.8076	26.9475	26.9421	26.9211	26.9232
P35611	ADDA_HUMAN	9	27.1983	27.2567	27.0757	27.2829	27.251
Q9UEY8	ADDG_HUMAN	13	27.1857	26.8818	26.9099	26.9458	26.9826
P11766	ADHX_HUMAN	10	28.2452	28.2216	28.1461	28.1187	28.1542
Q9Y2D8	ADIP_HUMAN	3	23.2928	23.3027	22.8259	22.9709	22.7699
Q9BRR6	ADPGK_HUMAN	13	30.9973	31.36	31.2299	31.2106	31.2865
Q16186	ADRM1_HUMAN	3	24.5117	24.3192	23.9243	24.0729	24.2741
P22570	ADRO_HUMAN	2	22.2155	22.2769	22.0318	21.2114	21.8983
P12235	ADT1_HUMAN	16	34.6778	34.9243	34.6488	34.7136	34.6703
P05141	ADT2_HUMAN	13	34.1605	34.6196	34.2906	34.3307	34.3326
P12236	ADT3_HUMAN	18	34.2406	34.6842	34.3534	34.3975	34.4024
Q9H0C2	ADT4_HUMAN	3	33.2572	33.7562	32.9476	32.8765	33.0566
P10109	ADX_HUMAN	4	25.0285	24.5827	25.0103	24.7993	24.8861
P55196	AFAD_HUMAN	9	25.4251	24.9639	25.2402	25.2017	25.1043
Q8WV93	AFG1L_HUMAN	2	22.489	22.0875	21.5842	22.167	22.0241
Q8NB90	AFG2H_HUMAN	1	20.6991	20.5356	20.0131	20.3458	20.2301
Q9Y4W6	AFG32_HUMAN	25	29.9824	29.8299	29.8523	29.9324	29.8849
Q5I7T1	AG10B_HUMAN	2	24.7099	24.5601	24.6006	24.7503	24.6201
P06280	AGAL_HUMAN	2	21.1824	23.2999	23.2666	23.4504	23.7329
Q96P47	AGAP3_HUMAN	2	22.768	22.657	22.7176	22.6496	22.87
Q53H12	AGK_HUMAN	15	29.3145	29.3075	29.254	29.2948	29.313
Q9UL18	AGO1_HUMAN	4	24.4809	24.5986	24.3826	24.3374	24.4817
Q9H9G7	AGO3_HUMAN	2	23.4416	23.6794	23.5592	23.8164	23.7706
O00468	AGRIN_HUMAN	7	23.9306	24.0383	23.7266	23.9293	24.1457
Q09666	AHNK_HUMAN	41	28.8124	28.6235	28.6699	28.7863	28.7728
O95433	AHSA1_HUMAN	2	24.3221	24.0796	24.1738	23.6244	23.8474
Q96BJ3	AIDA_HUMAN	3	24.6772	24.5694	24.5868	24.7167	24.4099
O95831	AIFM1_HUMAN	27	32.7064	32.9165	32.698	32.6985	32.91
Q9NVV5	AIG1_HUMAN	1	21.5835	21.5243	21.7393	21.814	21.2142
Q12904	AIMP1_HUMAN	12	29.2725	29.2772	29.3496	29.4913	29.412
Q13155	AIMP2_HUMAN	8	28.5873	28.7538	28.6173	28.759	28.853
Q16352	AINX_HUMAN	2	27.1219	26.4805	26.7122	26.8811	26.8367
O00170	AIP_HUMAN	5	24.3125	24.7808	24.7525	24.6235	24.7249
P14550	AK1A1_HUMAN	9	27.105	27.0863	26.9308	27.0169	27.237
O43572	AKA10_HUMAN	3	24.1055	23.6503	23.2067	23.2888	23.569
Q02952	AKA12_HUMAN	12	25.4811	25.4281	25.5872	25.4848	25.6226
Q9Y2D5	AKAP2_HUMAN	2	20.9603	21.2164	21.0843	20.6901	21.1625
Q13023	AKAP6_HUMAN	2	22.7261	21.9462	21.9409	21.6982	21.4359
Q99996	AKAP9_HUMAN	4	23.6636	23.9079	23.7994	23.475	23.6786
Q9P2G1	AKIB1_HUMAN	6	25.2324	24.9821	25.097	24.8825	24.8849
P31749	AKT1_HUMAN	2	28.7846	28.5679	28.4955	27.7326	26.5348
P31751	AKT2_HUMAN	2	28.7857	28.5776	28.5038	27.7433	26.564
Q96B36	AKTS1_HUMAN	2	22.7347	22.597	22.2975	22.2787	22.4015
O94788	AL1A2_HUMAN	2	26.192	25.8195	26.0761	26.1785	26.11
P47895	AL1A3_HUMAN	17	29.481	29.4712	29.3792	29.3317	29.3922
P30837	AL1B1_HUMAN	5	25.927	25.7972	25.72	25.8169	25.7708
O75891	AL1L1_HUMAN	14	27.1796	27.3883	27.0466	27.2352	27.2827
Q3SY69	AL1L2_HUMAN	1	22.6059	22.2952	22.7644	22.7792	22.6903
P51648	AL3A2_HUMAN	20	31.0519	31.3456	31.4278	31.5323	31.4893
P30038	AL4A1_HUMAN	24	31.0796	31.0858	31.1291	31.198	31.2227
P49419	AL7A1_HUMAN	22	31.4977	31.8218	31.8524	31.9641	31.9076
P49189	AL9A1_HUMAN	20	31.9604	32.0082	32.0842	32.1779	32.1232
P02768	ALBU_HUMAN	45	32.7873	32.8982	32.9135	32.9416	32.8945
P05091	ALDH2_HUMAN	20	32.1767	32.227	32.1681	32.1427	32.1354
P04075	ALDOA_HUMAN	23	31.5931	31.8837	31.7124	31.763	31.7877
P09972	ALDOC_HUMAN	15	29.6091	29.6491	29.4048	29.4062	29.4345
P15121	ALDR_HUMAN	2	25.3729	25.4522	25.4843	25.2473	25.5031
Q9BT22	ALG1_HUMAN	9	28.3564	28.3915	28.3929	28.3312	28.4376
Q2TAA5	ALG11_HUMAN	8	27.5302	27.5336	27.5514	27.6628	27.6091
Q9BV10	ALG12_HUMAN	3	26.3554	25.8947	26.038	26.0234	26.0888
Q9NP73	ALG13_HUMAN	2	24.9166	24.5407	24.5537	24.6677	24.826
Q96F25	ALG14_HUMAN	1	24.0235	23.6742	23.622	23.9209	23.7377
Q9H553	ALG2_HUMAN	13	28.8224	28.6873	28.6358	28.5882	28.6347
Q9Y673	ALG5_HUMAN	13	29.0174	28.7771	28.8346	28.7064	28.8473
Q9Y672	ALG6_HUMAN	3	26.462	27.1344	26.5963	26.7892	27.1341
Q9BVK2	ALG8_HUMAN	2	26.5673	25.9109	26.1016	26.3445	26.1187
Q9H6U8	ALG9_HUMAN	4	24.9662	25.078	24.9964	24.9272	24.8904
Q9BT30	ALKB7_HUMAN	2	21.7162	21.5744	21.8021	21.8203	21.7237
P55789	ALR_HUMAN	3	24.5687	24.2899	24.4178	24.5735	24.6415
P35858	ALS_HUMAN	3	23.5331	23.38	22.9295	23.1095	23.2626
Q9UHK6	AMACR_HUMAN	3	24.8894	24.6666	24.2051	24.4081	24.3207
P02760	AMBP_HUMAN	3	25.5452	25.8667	25.8641	25.954	25.917
Q9UKV5	AMFR_HUMAN	11	28.2721	27.94	28.0116	28.1519	28.1408
Q9H4A4	AMPB_HUMAN	4	23.6784	24.0983	23.954	24.2529	24.3015
Q01433	AMPD2_HUMAN	5	26.4625	26.2254	26.0229	26.2212	26.1117
P28838	AMPL_HUMAN	20	29.475	29.4306	29.4145	29.4522	29.4468
P30533	AMRP_HUMAN	22	30.5018	30.5166	30.6506	30.7781	30.5904
P39687	AN32A_HUMAN	4	25.4386	25.3106	25.1328	25.14	25.0811
Q92688	AN32B_HUMAN	3	25.266	25.4982	25.0128	24.9764	25.1629
Q9BTT0	AN32E_HUMAN	3	26.1165	26.0295	25.9961	26.1073	26.1633
P54802	ANAG_HUMAN	9	25.983	25.7716	25.6545	25.5712	25.7086
Q9P2R3	ANFY1_HUMAN	9	25.4031	25.1587	25.0437	25.0924	25.1044
P16157	ANK1_HUMAN	9	25.6581	25.1458	25.3055	25.4622	25.3029
Q01484	ANK2_HUMAN	3	26.6587	27.976	28.0091	28.2642	28.4539
Q12955	ANK3_HUMAN	10	25.6881	25.7155	26.1363	26.0004	25.7512
Q9HCJ1	ANKH_HUMAN	6	25.3037	24.8333	24.9957	25.2196	25.1337
Q8IWZ3	ANKH1_HUMAN	2	22.6508	23.1115	22.7008	22.5138	22.8154
Q86XL3	ANKL2_HUMAN	4	23.9674	23.407	22.8323	23.5645	23.5095
Q9BQD7	ANKMT_HUMAN	2	21.6535	22.1662	23.2868	23.116	23.3215
Q8IV38	ANKY2_HUMAN	7	26.1398	25.972	26.0746	26.0701	26.0319
Q99873	ANM1_HUMAN	4	23.5144	23.0931	23.1159	22.6056	22.9897
O14744	ANM5_HUMAN	3	24.9573	24.8513	24.9868	24.5261	24.9601
Q9NW15	ANO10_HUMAN	19	29.8059	30.0792	30.1389	30.2381	30.2313
Q4KMQ2	ANO6_HUMAN	16	27.751	27.9829	27.8662	27.8681	27.9868
Q9HCE9	ANO8_HUMAN	4	24.5145	24.4407	24.4062	24.5215	24.6504
P20594	ANPRB_HUMAN	3	23.8137	22.8666	22.9545	23.3199	23.1287
O75179	ANR17_HUMAN	3	23.9682	23.7436	23.634	23.4822	23.4752
Q96NW4	ANR27_HUMAN	2	23.2622	23.2137	22.9956	23.4879	23.1268
P50995	ANX11_HUMAN	13	28.4971	28.6638	28.4493	28.5932	28.5774
P04083	ANXA1_HUMAN	7	26.0505	25.9826	25.5663	25.4982	25.9664
P07355	ANXA2_HUMAN	17	28.9986	28.9833	28.8629	28.9417	28.9042
P09525	ANXA4_HUMAN	17	30.4258	30.1953	30.1015	30.1831	30.0865
P08758	ANXA5_HUMAN	15	30.3384	30.4839	30.2091	30.2121	30.287
P08133	ANXA6_HUMAN	35	32.7203	32.8748	32.7871	32.8518	32.8029
P20073	ANXA7_HUMAN	9	28.0025	28.2272	28.3112	28.4711	28.3705
P21397	AOFA_HUMAN	17	31.132	31.2867	31.3236	31.4826	31.3841
P27338	AOFB_HUMAN	18	30.3746	30.3758	30.402	30.6048	30.5266
O60641	AP180_HUMAN	2	25.4268	25.9573	25.4503	25.6252	25.8857
Q10567	AP1B1_HUMAN	29	29.6693	29.658	29.6688	29.7298	29.6722
O43747	AP1G1_HUMAN	16	28.5155	28.5579	28.4443	28.4182	28.474
Q9BXS5	AP1M1_HUMAN	15	28.4619	28.6127	28.4281	28.5529	28.5525
Q9Y6Q5	AP1M2_HUMAN	2	24.9835	24.6481	24.5686	24.8286	24.7889
P61966	AP1S1_HUMAN	2	23.3182	23.0056	22.9426	23.2098	23.1056
P56377	AP1S2_HUMAN	2	25.6113	25.2637	25.2017	25.3917	25.1701
O95782	AP2A1_HUMAN	24	29.9452	30.0579	29.9182	29.97	29.9924
O94973	AP2A2_HUMAN	22	30.1102	30.085	29.9397	29.9568	29.9797
P63010	AP2B1_HUMAN	32	30.3694	30.5494	30.4222	30.5149	30.4969
Q96CW1	AP2M1_HUMAN	11	28.3013	28.7651	28.7697	28.6446	28.7647
P53680	AP2S1_HUMAN	3	26.7208	26.4386	26.4941	26.5798	26.4875
O00203	AP3B1_HUMAN	19	28.4075	28.3702	28.2612	28.2733	28.4094
Q13367	AP3B2_HUMAN	2	23.4686	23.1815	23.3819	23.0279	23.366
O14617	AP3D1_HUMAN	19	27.9642	28.0538	27.8878	27.8706	27.9674
Q9Y2T2	AP3M1_HUMAN	8	27.0976	27.1638	27.0548	27.0745	27.086
P53677	AP3M2_HUMAN	4	24.5162	24.8189	24.8381	24.6727	24.6954
Q92572	AP3S1_HUMAN	2	26.0984	25.6605	25.786	26.1462	26.1609
P59780	AP3S2_HUMAN	3	25.7344	26.3318	26.4591	26.7193	26.6194
Q2VPB7	AP5B1_HUMAN	3	21.5637	22.3544	21.5755	21.0769	21.9848
O43299	AP5Z1_HUMAN	2	21.4879	21.0231	19.5682	19.9767	20.7927
P25054	APC_HUMAN	4	23.3049	22.9652	22.9484	22.8366	22.9183
P27695	APEX1_HUMAN	10	26.9143	26.8839	26.6683	26.4533	26.6042
Q9BZZ5	API5_HUMAN	2	22.1668	22.3572	22.5349	22.241	22.5133
Q06481	APLP2_HUMAN	15	26.9488	26.7523	27.1753	27.24	27.1433
Q9HDC9	APMAP_HUMAN	18	31.6226	31.7355	31.8996	32.0418	31.9857
P02647	APOA1_HUMAN	8	26.7265	26.9829	26.3729	26.2891	26.5701
P06727	APOA4_HUMAN	3	24.4816	24.5122	24.5595	24.0943	24.2401
Q6Q788	APOA5_HUMAN	2	23.0217	23.6101	23.0407	23.2118	23.0418
P02654	APOC1_HUMAN	2	23.1666	22.6372	23.3159	23.1913	23.1052
P05090	APOD_HUMAN	4	25.5648	24.8616	24.9478	25.2668	24.9662
P02649	APOE_HUMAN	16	29.7867	29.7823	29.7982	29.8729	29.7837
P02749	APOH_HUMAN	11	29.5426	29.499	29.6159	29.5265	29.6878
Q8NBQ7	AQP11_HUMAN	2	24.3789	25.0882	24.9465	24.501	24.8883
Q15041	AR6P1_HUMAN	3	27.1758	27.0388	27.3964	27.5149	27.433
P10398	ARAF_HUMAN	3	23.9828	24.084	23.7998	24.0698	24.2192
Q6UW56	ARAID_HUMAN	2	23.9257	23.8571	24.1712	24.2038	24.1923
Q96P48	ARAP1_HUMAN	4	24.8468	24.6924	24.6512	24.7577	24.6713
Q92747	ARC1A_HUMAN	2	23.2984	23.6891	23.5622	23.0063	23.3114
O15143	ARC1B_HUMAN	9	27.5484	27.2766	27.4849	27.6292	27.5498
O15033	AREL1_HUMAN	1	21.5224	21.1367	21.4801	21.0339	21.271
P84077	ARF1_HUMAN	7	30.3385	31.0012	30.8641	31.0469	30.9747
P61204	ARF3_HUMAN	7	30.3385	31.0012	30.8641	31.0469	30.9747
P18085	ARF4_HUMAN	6	28.976	29.4582	29.4554	29.4075	29.4972
P84085	ARF5_HUMAN	8	28.5028	29.2576	28.9273	29.3171	29.3507
P62330	ARF6_HUMAN	4	27.7732	28.1586	28.0992	28.0196	28.0294
Q8N6T3	ARFG1_HUMAN	2	25.0638	25.3643	25.298	25.3163	25.3781
Q8N6H7	ARFG2_HUMAN	8	26.1489	26.0677	26.0047	25.9809	26.0101
Q9NP61	ARFG3_HUMAN	5	23.8795	23.5874	23.3594	23.1586	23.5288
P53367	ARFP1_HUMAN	5	25.6763	25.1824	25.2869	25.1848	25.2731
P53365	ARFP2_HUMAN	2	22.4108	21.952	22.1611	21.9696	22.1098
Q13795	ARFRP_HUMAN	1	24.7352	24.9662	24.368	24.3556	25.0257
Q9HCE6	ARGAL_HUMAN	3	25.2435	24.9395	25.0135	25.2514	25.2365
A1IGU5	ARH37_HUMAN	9	26.5246	26.5049	26.6411	26.5916	26.4814
Q92888	ARHG1_HUMAN	3	24.566	24.7317	24.7621	24.4637	24.6766
Q15052	ARHG6_HUMAN	2	24.8284	24.4631	24.5098	24.7071	24.5142
Q14155	ARHG7_HUMAN	14	27.2144	27.3739	27.2717	27.1975	27.2862
O15013	ARHGA_HUMAN	2	22.4694	22.6512	22.6635	22.2544	21.8193
O15085	ARHGB_HUMAN	4	23.7791	23.489	23.6765	23.414	23.4677
Q9NZN5	ARHGC_HUMAN	8	25.7993	25.6426	25.1171	25.443	25.1902
Q9Y4X5	ARI1_HUMAN	2	21.5753	21.9093	21.0809	21.6907	21.888
O43488	ARK72_HUMAN	7	29.2496	29.6488	29.4475	29.423	29.5057
O95154	ARK73_HUMAN	5	26.9565	27.1971	27.0595	27.2092	27.1484
Q8NHP1	ARK74_HUMAN	2	27.7927	28.1854	27.5129	27.5293	27.6037
P40616	ARL1_HUMAN	6	27.054	27.1793	27.2288	27.3212	27.2939
Q9NXU5	ARL15_HUMAN	5	25.2767	25.2508	25.1927	25.0956	25.2074
P36405	ARL3_HUMAN	3	26.801	27.0156	26.7946	26.9024	27.0382
Q9H0F7	ARL6_HUMAN	2	22.3386	22.3487	22.0189	22.0682	21.9931
Q96BM9	ARL8A_HUMAN	11	30.4893	30.6937	30.5856	30.3941	30.5853
Q9NVJ2	ARL8B_HUMAN	9	30.4628	30.7941	30.6727	30.4672	30.7339
Q8N2F6	ARM10_HUMAN	5	28.0109	28.0928	27.9274	27.6199	27.7474
Q9NVT9	ARMC1_HUMAN	3	24.3975	24.7237	24.5511	24.5295	24.7358
Q7Z3E5	ARMC9_HUMAN	1	20.3192	20.4991	20.3961	19.872	19.6698
Q9P291	ARMX1_HUMAN	3	23.4545	22.9281	23.0617	23.0915	23.2077
Q9NZ32	ARP10_HUMAN	2	23.2565	23.4712	23.2942	22.7281	23.3243
P61160	ARP2_HUMAN	7	28.4971	28.5	28.6279	28.7266	28.6418
P61158	ARP3_HUMAN	13	28.8501	28.845	28.7758	28.7483	28.7566
Q9P1U1	ARP3B_HUMAN	3	23.0711	22.9132	22.9469	23.0143	22.9792
Q9BPX5	ARP5L_HUMAN	3	26.3103	25.9844	25.9766	26.214	26.1009
O15144	ARPC2_HUMAN	8	27.5592	27.4977	27.5987	27.9258	27.69
O15145	ARPC3_HUMAN	6	25.8394	25.3724	25.3769	25.5753	25.589
P59998	ARPC4_HUMAN	5	27.8907	28.0357	28.0826	28.2235	28.1664
O15511	ARPC5_HUMAN	4	26.6557	26.6956	26.749	26.9254	26.8485
P49407	ARRB1_HUMAN	1	24.9947	24.4269	24.5605	24.4924	24.6744
P36575	ARRC_HUMAN	4	24.6591	24.3163	24.8524	24.5121	24.6891
P10523	ARRS_HUMAN	19	29.939	29.882	29.962	29.7839	29.8992
P15289	ARSA_HUMAN	5	26.505	25.5217	25.7805	25.8295	25.6874
P15848	ARSB_HUMAN	4	25.2963	25.0279	24.8396	25.2352	24.8929
P51689	ARSD_HUMAN	9	28.6053	28.5979	28.5294	28.6683	28.5934
Q5FYA8	ARSH_HUMAN	1	20.954	21.687	21.7752	21.7697	22.1036
P51690	ARSL_HUMAN	2	21.43	20.788	21.3526	21.5033	21.2253
O00192	ARVC_HUMAN	3	22.6971	22.6736	22.5455	22.2323	22.5721
Q13510	ASAH1_HUMAN	19	32.3191	32.738	32.6173	32.4822	32.6335
Q7L266	ASGL1_HUMAN	4	24.7798	24.6078	24.7673	24.6274	24.7215
P17405	ASM_HUMAN	2	23.0769	23.2358	22.8723	22.5508	22.7189
O95671	ASML_HUMAN	2	20.2809	21.1265	21.2022	20.4072	20.7032
Q12797	ASPH_HUMAN	24	30.0589	30.0075	30.1401	30.2491	30.1742
Q8IZT6	ASPM_HUMAN	2	20.865	20.9747	20.4194	20.1494	20.1837
Q13625	ASPP2_HUMAN	5	24.7742	24.4531	24.3541	24.3869	24.571
Q3KR37	ASTRB_HUMAN	4	22.2674	21.5971	22.1862	21.6168	21.8227
Q8IYS0	ASTRC_HUMAN	5	25.8487	26.138	25.7775	25.9555	26.0176
O94823	AT10B_HUMAN	2	23.6322	23.9763	24.0208	23.8291	23.933
P98196	AT11A_HUMAN	9	26.5905	26.191	26.3891	26.1818	26.3334
Q9Y2G3	AT11B_HUMAN	2	21.3321	21.153	20.2686	20.7963	20.2472
Q8NB49	AT11C_HUMAN	17	28.0563	28.1825	28.0059	28.0301	28.1276
P54707	AT12A_HUMAN	5	31.1589	31.1101	31.4926	31.6068	31.4244
Q9HD20	AT131_HUMAN	35	29.536	29.7298	29.6486	29.6581	29.7393
Q9NQ11	AT132_HUMAN	3	23.3218	22.8562	23.0425	23.3586	23.258
Q9H7F0	AT133_HUMAN	4	24.8586	24.7407	24.5102	24.4486	24.4747
Q4VNC1	AT134_HUMAN	2	22.8522	22.7131	21.9422	21.8939	22.8873
P05023	AT1A1_HUMAN	49	34.2726	34.1324	34.2921	34.3968	34.2627
P50993	AT1A2_HUMAN	17	32.6496	32.6651	32.8855	33.0005	32.7992
P13637	AT1A3_HUMAN	40	33.3946	33.391	33.5825	33.6558	33.5039
Q13733	AT1A4_HUMAN	7	31.7021	31.6914	32.0818	32.1873	31.8549
P05026	AT1B1_HUMAN	13	33.0026	33.0298	33.1213	33.2107	33.1838
P14415	AT1B2_HUMAN	6	26.4173	26.2945	26.4533	26.5722	26.421
P54709	AT1B3_HUMAN	6	28.6392	28.7796	28.3924	28.4334	28.5609
O14983	AT2A1_HUMAN	13	31.6052	31.632	31.722	31.8256	31.8042
P16615	AT2A2_HUMAN	41	32.7548	32.8608	32.8686	32.966	32.9359
Q93084	AT2A3_HUMAN	8	30.8294	31.0833	31.1223	31.2789	31.2571
P20020	AT2B1_HUMAN	19	28.2371	28.286	28.1957	28.1794	28.2625
Q01814	AT2B2_HUMAN	38	29.7793	30.1157	30.0449	30.0449	30.0861
Q16720	AT2B3_HUMAN	13	27.8643	27.8771	27.9816	27.9782	28.0009
P23634	AT2B4_HUMAN	15	27.8974	27.9947	27.8286	27.8088	27.903
P98194	AT2C1_HUMAN	18	28.1905	28.1243	28.1714	28.1883	28.1902
Q8IUZ5	AT2L2_HUMAN	1	20.3497	20.7913	20.3308	20.5735	20.1818
Q5VTU8	AT5EL_HUMAN	2	28.1546	27.6013	27.9843	28.0023	27.791
P24539	AT5F1_HUMAN	15	31.5242	31.5726	31.7549	31.8286	31.7546
Q9Y2Q0	AT8A1_HUMAN	22	29.8997	29.7314	29.6488	29.75	29.7173
Q8NBU5	ATAD1_HUMAN	9	28.4884	28.3738	28.5539	28.5761	28.5472
Q6PL18	ATAD2_HUMAN	2	21.8871	21.7438	21.6585	20.9326	21.6194
Q9NVI7	ATD3A_HUMAN	12	28.8367	28.7769	28.7169	28.7653	28.6572
Q5T9A4	ATD3B_HUMAN	9	28.0211	28.1793	28.1507	28.3561	28.237
Q5T2N8	ATD3C_HUMAN	3	27.5425	27.5901	27.4933	27.461	27.3058
Q9NT62	ATG3_HUMAN	2	24.0887	23.6284	23.6875	23.6436	23.6894
Q9H1Y0	ATG5_HUMAN	2	22.1162	22.1678	22.3327	22.3203	22.4076
O95352	ATG7_HUMAN	2	22.5472	21.9509	21.6598	21.2686	21.0512
Q9UII2	ATIF1_HUMAN	2	26.1575	25.498	25.8551	26.177	25.955
Q8NHH9	ATLA2_HUMAN	6	26.2767	26.7218	26.3914	26.2344	26.5358
Q6DD88	ATLA3_HUMAN	17	30.6485	30.7041	30.6885	30.4644	30.5682
O00244	ATOX1_HUMAN	2	24.7378	24.7148	24.3043	24.4259	24.3987
P20648	ATP4A_HUMAN	3	31.0854	31.1926	31.5859	31.7177	31.5413
O75947	ATP5H_HUMAN	8	30.6603	30.6535	30.8439	30.995	30.8479
P56385	ATP5I_HUMAN	4	30.0281	30.4043	30.4675	30.5696	30.4355
P18859	ATP5J_HUMAN	3	26.7506	26.7633	26.6937	26.6259	26.6503
O75964	ATP5L_HUMAN	3	30.9631	31.472	31.5948	31.7733	31.6246
Q99766	ATP5S_HUMAN	2	22.9596	22.2418	22.2935	22.5209	22.195
P00846	ATP6_HUMAN	1	28.9	29.4058	29.7471	29.8701	29.688
P56378	ATP68_HUMAN	1	27.8285	27.9008	27.862	28.0617	27.981
O75110	ATP9A_HUMAN	2	22.3933	22.0369	22.1545	22.2742	22.3253
O43861	ATP9B_HUMAN	1	21.0513	20.8715	20.9307	20.9879	21.381
P25705	ATPA_HUMAN	26	35.1986	35.3166	35.1154	35.2095	35.1665
P06576	ATPB_HUMAN	21	35.431	35.7349	35.6576	35.7418	35.7404
P30049	ATPD_HUMAN	3	29.404	29.0001	29.4222	29.542	29.4013
Q5TC12	ATPF1_HUMAN	5	25.0866	25.0555	24.7825	24.9035	25.047
Q8N5M1	ATPF2_HUMAN	5	24.6732	24.6876	24.6483	24.7709	24.7077
P36542	ATPG_HUMAN	11	31.5566	31.5946	31.5483	31.7438	31.7298
P56134	ATPK_HUMAN	3	30.6355	31.0369	30.4207	30.2844	30.5209
Q96IX5	ATPMD_HUMAN	4	29.8657	30.1376	30.1318	30.3185	30.1367
P48047	ATPO_HUMAN	12	32.605	32.7669	32.7069	32.6883	32.7143
Q6RW13	ATRAP_HUMAN	2	26.599	26.3153	26.3122	26.2567	26.2713
O75882	ATRN_HUMAN	3	23.724	23.384	23.5689	23.5851	23.5939
Q9UBB4	ATX10_HUMAN	5	25.0624	24.6396	24.8807	24.9234	25.0862
Q99700	ATX2_HUMAN	2	23.4228	23.6231	23.5025	23.5617	23.7363
Q8WWM7	ATX2L_HUMAN	1	21.6705	21.1665	21.4475	21.1124	21.5591
Q13825	AUHM_HUMAN	6	27.9446	28.1206	28.0584	28.261	28.2057
Q9Y679	AUP1_HUMAN	6	27.4413	27.6178	27.4418	27.4654	27.6021
A6NMY6	AXA2L_HUMAN	10	28.3989	28.4279	28.3589	28.4449	28.4157
Q07817	B2CL1_HUMAN	2	25.2261	25.2352	25.4181	25.523	25.4311
Q9BXK5	B2L13_HUMAN	4	28.3655	28.2629	28.0333	27.713	27.794
P61769	B2MG_HUMAN	2	26.133	25.6654	26.3025	26.3684	26.1812
P04920	B3A2_HUMAN	15	27.3431	27.3188	27.3457	27.3354	27.2982
P48751	B3A3_HUMAN	2	23.3828	23.0403	23.2458	23.3794	23.1575
P02730	B3AT_HUMAN	13	27.5992	27.843	27.4217	27.6375	27.6777
O94766	B3GA3_HUMAN	10	29.2545	29.3002	29.1086	29.1519	29.1016
Q8NCR0	B3GL2_HUMAN	6	26.8159	25.2409	25.2446	25.1215	25.2503
Q9NY97	B3GN2_HUMAN	2	20.4362	22.3573	21.8566	21.915	21.9295
Q96L58	B3GT6_HUMAN	3	25.548	24.9455	25.4798	25.7496	25.529
O43505	B4GA1_HUMAN	3	22.9849	22.4794	22.73	22.9731	22.6207
P15291	B4GT1_HUMAN	4	25.3701	25.4052	25.1675	24.8058	24.9023
Q9NWV8	BABA1_HUMAN	1	23.609	23.4359	22.6755	23.2619	23.1394
Q9NXR7	BABA2_HUMAN	2	22.8763	22.515	22.4342	21.9004	22.2318
O75531	BAF_HUMAN	2	24.4637	24.3096	24.1983	23.8588	24.379
O95816	BAG2_HUMAN	3	24.7443	24.7018	24.8075	24.8173	24.9362
O95817	BAG3_HUMAN	7	26.0794	25.9909	25.8832	25.8263	25.8618
Q9UL15	BAG5_HUMAN	7	25.8623	26.008	25.5937	25.5318	25.7205
P46379	BAG6_HUMAN	4	24.9293	24.7064	24.5253	24.5252	24.643
Q9UQB8	BAIP2_HUMAN	10	27.2847	26.9502	26.8264	26.8991	26.8759
Q16611	BAK_HUMAN	2	23.6604	23.2746	23.4831	22.9613	23.4129
Q9UHQ4	BAP29_HUMAN	6	27.9812	27.8901	28.1112	28.2777	28.2155
P51572	BAP31_HUMAN	11	30.3513	30.4057	30.673	30.7972	30.6533
P35613	BASI_HUMAN	9	34.341	34.6607	34.3907	34.4893	34.4082
P80723	BASP1_HUMAN	26	31.6803	31.4331	31.8057	31.9793	31.852
Q07812	BAX_HUMAN	2	23.7915	23.8758	23.7992	23.5881	24.0166
Q9BXC9	BBS2_HUMAN	2	23.6313	23.278	23.4974	23.5873	23.3119
P50895	BCAM_HUMAN	8	26.161	26.0079	25.8944	26.2041	26.0697
Q9H6U6	BCAS3_HUMAN	2	22.6417	20.6998	21.0517	20.8973	21.2631
P54687	BCAT1_HUMAN	10	29.0201	29.2981	28.9872	29.0028	29.2034
O15382	BCAT2_HUMAN	5	23.7041	23.5654	23.476	23.3694	23.183
Q9HAY6	BCDO1_HUMAN	14	28.2174	28.2377	28.32	28.15	28.2264
Q9BYV7	BCDO2_HUMAN	2	22.1896	22.0402	21.885	21.3953	21.6574
O14874	BCKD_HUMAN	4	25.2456	24.9018	25.4482	25.4946	25.333
Q9NYF8	BCLF1_HUMAN	2	24.2669	24.0158	24.0312	24.1736	24.0407
P11274	BCR_HUMAN	2	23.8661	23.2218	23.3678	23.6257	23.4205
Q9Y276	BCS1_HUMAN	13	27.6556	27.5806	27.6018	27.4992	27.646
Q02338	BDH_HUMAN	8	29.3344	29.2086	29.1785	29.1825	29.2571
Q9BUT1	BDH2_HUMAN	5	27.8223	27.6679	27.7967	27.9259	27.8469
A6H8Y1	BDP1_HUMAN	2	22.2683	21.8073	22.1263	20.486	21.302
Q14457	BECN1_HUMAN	2	21.9845	21.3945	21.2685	21.83	21.2553
O76090	BEST1_HUMAN	25	30.29	30.4017	30.3149	30.3226	30.4864
Q8N1M1	BEST3_HUMAN	2	23.4035	23.0017	22.3951	22.9509	22.4992
O15155	BET1_HUMAN	2	25.7371	25.4765	25.7654	25.6348	25.6857
P16278	BGAL_HUMAN	11	28.4967	28.5364	28.6408	28.7745	28.8954
P08236	BGLR_HUMAN	10	28.0378	28.0677	27.6577	27.8071	27.9029
P53004	BIEA_HUMAN	3	23.5715	23.0776	23.1554	22.9282	23.2204
Q9Y6D6	BIG1_HUMAN	8	26.4873	26.8481	26.3866	26.3463	26.6933
Q9Y6D5	BIG2_HUMAN	23	27.5649	27.7243	27.4632	27.3722	27.6595
Q5TH69	BIG3_HUMAN	5	24.9508	24.9063	25.5649	25.3683	25.5075
Q9NQY0	BIN3_HUMAN	3	22.5676	23.0461	22.9317	23.2642	22.8882
P11021	BIP_HUMAN	40	34.75	35.084	35.0153	35.1583	35.0838
P78537	BL1S1_HUMAN	3	25.649	25.5004	25.4645	25.2771	25.4414
Q13867	BLMH_HUMAN	2	23.9196	23.2694	23.1665	23.3044	23.3911
P30043	BLVRB_HUMAN	5	26.5378	26.7949	26.6692	26.5879	26.9225
P22003	BMP5_HUMAN	2	23.6568	23.545	23.2824	23.3821	23.3508
P18075	BMP7_HUMAN	5	27.105	26.9499	27.0686	27.1381	27.1255
Q9UMX3	BOK_HUMAN	8	27.1841	27.3902	27.4783	27.5468	27.4726
Q9H3K6	BOLA2_HUMAN	1	21.3101	21.3838	20.9418	21.4611	20.7789
Q969J3	BORC5_HUMAN	2	25.0896	24.4844	24.4819	24.6946	24.3169
Q96GS4	BORC6_HUMAN	7	25.8528	25.3451	25.2208	25.4857	25.4565
Q96B45	BORC7_HUMAN	2	23.1251	22.8507	22.9815	23.0293	23.0384
Q96FH0	BORC8_HUMAN	2	23.2595	22.6356	22.848	22.7099	22.6986
Q9H3Q1	BORG4_HUMAN	2	21.515	21.0881	21.2141	20.7645	20.5996
Q86WA6	BPHL_HUMAN	3	23.73	23.1267	23.0388	23.3507	23.4009
P50747	BPL1_HUMAN	3	21.6918	21.743	21.7939	21.5617	21.8573
O95861	BPNT1_HUMAN	3	24.3209	24.2708	23.9163	23.8218	24.0795
Q8WY22	BRI3B_HUMAN	2	25.5844	25.4622	25.8291	25.9515	25.7605
Q8WUW1	BRK1_HUMAN	2	24.3561	24.1276	24.1899	24.0392	24.1353
Q5VW32	BROX_HUMAN	2	23.5803	23.3539	23.5826	23.6755	23.4518
Q8TDN6	BRX1_HUMAN	2	22.5112	21.9324	22.1816	22.0509	22.1233
Q5W0U4	BSPRY_HUMAN	5	24.176	24.0572	24.2809	24.3489	24.1395
Q10589	BST2_HUMAN	2	24.368	23.8777	24.2124	24.3468	24.2232
Q7KYR7	BT2A1_HUMAN	1	20.4804	20.1809	20.4916	20.6696	20.9052
Q96K17	BT3L4_HUMAN	1	19.758	22.1403	18.9613	20.1558	20.7467
P43251	BTD_HUMAN	5	25.3093	25.1241	25.1271	25.0505	25.1586
O43684	BUB3_HUMAN	2	22.8623	22.7256	22.6968	23.0612	23.0423
Q7L1Q6	BZW1_HUMAN	2	23.4479	22.3774	22.7145	23.2984	22.7794
Q9Y6E2	BZW2_HUMAN	2	24.4197	24.7818	24.3718	23.8362	23.5052
Q86VB7	C163A_HUMAN	2	22.1935	21.3194	21.7014	22.134	22.0735
Q9NS00	C1GLT_HUMAN	2	23.7463	23.6372	23.4878	23.4728	23.5653
Q07021	C1QBP_HUMAN	9	31.6504	32.0903	31.6499	31.3411	31.7763
Q9BXJ0	C1QT5_HUMAN	3	25.5399	24.8609	25.4028	25.3796	25.2655
P11586	C1TC_HUMAN	17	28.4941	28.5291	28.4936	28.6246	28.6016
Q86YS7	C2CD5_HUMAN	3	23.3715	23.1676	23.5039	23.4974	23.2287
Q6P1N0	C2D1A_HUMAN	7	26.1172	25.8734	25.3701	25.5613	25.5911
Q9NRR3	C42S2_HUMAN	2	26.2822	26.3878	26.4498	26.3168	26.3427
Q99643	C560_HUMAN	2	27.8994	28.1192	28.1779	28.4251	28.2671
Q8TCZ2	C99L2_HUMAN	4	26.528	26.4001	26.5873	26.7903	26.8366
Q9BWL3	CA043_HUMAN	5	25.9835	25.722	25.5209	25.8476	25.6425
Q9H425	CA198_HUMAN	2	24.5044	24.3464	24.3597	24.599	24.6956
P54289	CA2D1_HUMAN	4	22.5438	22.8441	22.3047	22.0725	22.6097
Q9NY47	CA2D2_HUMAN	3	23.5184	23.4308	23.678	23.8239	23.2332
Q9Y376	CAB39_HUMAN	5	25.1647	24.6698	24.6175	24.7401	24.8175
Q9BRK5	CAB45_HUMAN	4	24.8952	24.7827	24.937	25.0182	24.7389
Q08289	CACB2_HUMAN	3	23.6268	23.1668	23.1263	23.3504	23.166
Q9P1Z2	CACO1_HUMAN	2	22.6318	22.5141	22.894	22.754	22.4836
Q13137	CACO2_HUMAN	9	26.0486	26.1042	25.8714	25.944	25.9899
P43155	CACP_HUMAN	23	28.8373	28.8882	28.9585	29.0337	28.9588
P12830	CADH1_HUMAN	6	27.5461	27.5699	27.2806	27.4011	27.0766
P22223	CADH3_HUMAN	23	30.0412	30.1925	30.1138	30.0245	30.0403
Q9BY67	CADM1_HUMAN	6	26.3481	26.0544	25.8856	25.7343	25.9851
Q8N3J6	CADM2_HUMAN	8	26.9574	27.2012	27.1457	27.1853	27.1317
Q8NFZ8	CADM4_HUMAN	10	28.4081	28.1305	28.027	28.0931	28.0269
Q5T440	CAF17_HUMAN	5	26.5091	26.5599	26.3092	26.2058	26.2865
P00915	CAH1_HUMAN	6	28.1691	28.3529	28.2339	28.2923	28.277
Q9ULX7	CAH14_HUMAN	8	31.6171	31.2223	31.4552	31.6027	31.4289
P00918	CAH2_HUMAN	11	28.9389	28.8222	28.7842	28.9641	28.8362
Q9Y2D0	CAH5B_HUMAN	5	27.3146	27.7338	27.8113	27.8598	27.8474
P27482	CALL3_HUMAN	3	29.3926	29.1897	29.1694	29.2475	29.2215
Q96GE6	CALL4_HUMAN	4	24.423	24.1027	24.0305	23.9648	24.0959
P0DP23	CALM1_HUMAN	11	32.5021	32.3115	32.4146	32.5012	32.3696
P27797	CALR_HUMAN	24	33.845	34.4234	34.3189	34.2585	34.3442
O43852	CALU_HUMAN	25	32.8033	33.1487	33.0041	33.1125	33.033
P27824	CALX_HUMAN	47	33.4574	33.5828	33.6637	33.7219	33.7429
P49069	CAMLG_HUMAN	7	26.8392	26.6952	26.8332	26.8384	26.8064
P07384	CAN1_HUMAN	12	27.0402	26.9415	26.93	27.0635	27.038
P17655	CAN2_HUMAN	6	24.5787	24.2595	24.2133	24.4428	24.3284
O15484	CAN5_HUMAN	2	22.7573	23.5449	23.1664	22.4452	22.8921
Q9Y6W3	CAN7_HUMAN	1	21.9298	21.4205	21.1088	21.8811	21.5877
Q86VP6	CAND1_HUMAN	24	28.2601	28.3062	28.1654	28.273	28.3223
O75155	CAND2_HUMAN	5	24.3094	23.6076	23.7283	24.0113	23.8067
Q8WVQ1	CANT1_HUMAN	5	24.762	24.9691	24.6738	24.9501	24.9564
Q01518	CAP1_HUMAN	12	28.1231	28.0726	28.2121	28.2729	28.1406
P40123	CAP2_HUMAN	5	25.7949	25.1911	25.464	25.3048	25.537
Q14444	CAPR1_HUMAN	6	26.2912	25.8411	25.9878	26.0514	26.0567
P47756	CAPZB_HUMAN	6	27.2469	27.0434	26.9264	27.0154	27.0422
Q9BXL7	CAR11_HUMAN	1	19.9199	18.8081	18.1567	18.0464	18.1235
Q5VZK9	CARL1_HUMAN	3	23.7337	23.2775	23.0874	23.1492	22.8713
Q6P4E1	CASC4_HUMAN	10	27.6822	27.454	27.6293	27.7917	27.6118
Q13948	CASP_HUMAN	4	23.6229	23.7739	23.3572	23.3941	23.6927
P04040	CATA_HUMAN	24	31.3872	31.1892	31.2993	31.3568	31.3331
P07858	CATB_HUMAN	10	29.8414	29.9749	29.9837	30.0402	30.0071
P07339	CATD_HUMAN	19	35.8655	36.2014	36.0348	36.0707	36.0889
Q9UBX1	CATF_HUMAN	2	24.5164	23.5068	23.9289	24.3295	24.1427
P43235	CATK_HUMAN	2	25.1129	24.9313	25.184	25.4713	25.4299
Q9UBR2	CATZ_HUMAN	4	25.0637	25.0358	25.1145	25.0563	25.1679
P52907	CAZA1_HUMAN	7	27.1201	27.2384	27.0305	27.0399	27.1317
P47755	CAZA2_HUMAN	9	27.7738	28.0434	27.6863	27.5409	27.6579
A6NCS6	CB072_HUMAN	2	22.1979	21.8711	21.8642	21.7671	22.2615
Q9H9S4	CB39L_HUMAN	2	23.5018	23.3362	23.0357	23.3052	23.361
Q96IY4	CBPB2_HUMAN	2	23.6949	23.3585	23.2612	23.6586	23.5369
O75976	CBPD_HUMAN	12	26.6031	26.6541	26.6672	26.5649	26.6227
P16870	CBPE_HUMAN	4	24.1277	24.1563	24.3245	24.2047	24.4068
P14384	CBPM_HUMAN	2	23.1691	23.1375	22.7811	22.5673	22.7286
Q9Y646	CBPQ_HUMAN	7	28.907	29.1055	29.07	29.158	29.1464
P16152	CBR1_HUMAN	12	29.7399	29.7642	29.5785	29.6444	29.6855
O75828	CBR3_HUMAN	2	27.2025	27.3333	27.124	27.2812	27.3701
Q8N4T8	CBR4_HUMAN	4	25.3321	25.6585	25.6747	25.6151	25.5696
Q13185	CBX3_HUMAN	3	22.882	22.9175	22.9479	22.9906	22.9112
Q6P1S2	CC033_HUMAN	5	25.2669	25.802	25.6294	25.8999	25.7476
Q96CT7	CC124_HUMAN	3	22.6798	23.028	22.8614	22.9773	22.8503
Q96BQ5	CC127_HUMAN	5	27.3826	27.4452	27.0783	27.406	27.4156
Q9H6E4	CC134_HUMAN	3	25.8725	25.6173	25.5447	25.5458	25.4996
Q9P1Z9	CC180_HUMAN	2	21.6759	21.821	21.8709	21.8676	21.8559
Q8IWP9	CC28A_HUMAN	3	24.5277	24.3661	24.4322	24.3897	24.5169
Q9NV96	CC50A_HUMAN	7	27.4031	27.2454	27.4652	27.6835	27.5459
Q9GZT6	CC90B_HUMAN	8	27.7293	27.5275	27.6542	27.7175	27.5797
Q8N163	CCAR2_HUMAN	5	24.2395	23.8531	23.9867	23.9278	24.2633
O60826	CCD22_HUMAN	13	26.3397	26.2517	26.2277	26.2184	26.277
Q86WR0	CCD25_HUMAN	1	19.7658	18.9661	19.452	19.6319	19.5494
Q96A33	CCD47_HUMAN	19	29.881	29.9201	29.9719	30.0398	29.9967
Q9Y6R9	CCD61_HUMAN	5	27.1105	26.9443	26.8296	26.9847	26.8189
Q567U6	CCD93_HUMAN	5	26.6268	26.0856	26.2193	26.1873	25.9762
P53701	CCHL_HUMAN	11	27.7244	27.6816	27.5314	27.4985	27.5652
Q8ND76	CCNY_HUMAN	2	24.7583	24.7312	25.1774	24.724	25.125
Q9ULG6	CCPG1_HUMAN	4	24.8722	24.4255	24.5451	24.8631	24.566
O14618	CCS_HUMAN	4	25.7843	25.3824	25.57	25.5582	25.505
P86791	CCZ1_HUMAN	6	25.106	25.0744	24.931	25.0671	25.1281
Q6YHK3	CD109_HUMAN	4	23.7513	23.5758	23.8572	23.4308	23.2791
P08571	CD14_HUMAN	4	23.1461	23.5339	23.4902	22.8943	23.3742
Q5ZPR3	CD276_HUMAN	5	25.4607	25.3066	25.3575	25.1219	25.2215
Q9Y5K6	CD2AP_HUMAN	2	22.8451	22.6243	22.3298	22.7342	22.4863
Q8IX05	CD302_HUMAN	2	25.8294	25.2429	25.6396	25.7137	25.5729
Q9NPF0	CD320_HUMAN	3	25.3357	25.7532	25.489	25.8447	25.7389
P16070	CD44_HUMAN	2	23.7251	23.3727	23.4516	23.3057	23.1572
Q08722	CD47_HUMAN	2	27.3385	27.0684	27.0462	27.0926	27.052
P13987	CD59_HUMAN	3	28.8778	28.5589	28.9069	29.0525	28.9354
P08962	CD63_HUMAN	3	26.7657	26.438	25.4894	25.7511	25.5706
P60033	CD81_HUMAN	2	27.4118	27.925	27.8426	27.6065	27.7814
P27701	CD82_HUMAN	4	25.256	25.1129	25.3252	25.3736	25.3672
P21926	CD9_HUMAN	5	29.0174	28.5312	28.6544	28.7749	28.8562
P14209	CD99_HUMAN	2	23.3895	22.8123	23.4738	23.5762	23.0769
Q13042	CDC16_HUMAN	3	22.2578	21.9811	21.7912	21.9399	21.7914
Q16543	CDC37_HUMAN	5	27.0512	26.9124	26.7167	26.7554	26.5711
P60953	CDC42_HUMAN	8	29.3559	29.1937	29.309	29.2593	29.2696
Q99459	CDC5L_HUMAN	3	24.2611	24.5588	24.2778	23.8837	24.2507
Q96JP9	CDHR1_HUMAN	4	24.1136	23.7539	23.4616	23.5137	23.6035
Q9HBB8	CDHR5_HUMAN	6	27.0895	26.7445	26.5423	26.7448	26.6826
O14735	CDIPT_HUMAN	4	28.2225	28.7026	28.8156	28.9054	28.8332
Q14004	CDK13_HUMAN	1	20.7216	19.8761	17.6063	18.7507	17.7229
Q00536	CDK16_HUMAN	1	20.23	20.2106	20.4729	19.5561	20.5716
Q8IZL9	CDK20_HUMAN	1	21.8101	21.3921	21.5433	21.7109	21.7916
Q00535	CDK5_HUMAN	4	25.4678	25.2596	25.0401	25.1865	25.1736
Q00534	CDK6_HUMAN	1	21.7611	22.0364	22.0325	21.5409	22.0389
Q5VV42	CDKAL_HUMAN	3	23.0652	23.105	23.0573	23.1422	23.2739
P46527	CDN1B_HUMAN	4	24.3816	24.1976	24.166	24.3799	24.4263
Q01850	CDR2_HUMAN	3	24.803	25.2516	24.9581	25.0935	25.0595
Q92903	CDS1_HUMAN	3	24.3144	24.7529	24.1324	23.9299	24.1521
O95674	CDS2_HUMAN	9	27.5393	27.5973	27.7384	27.6517	27.7415
Q9UKY7	CDV3_HUMAN	3	25.1624	24.6267	24.9252	25.0773	24.9138
Q9UHN6	CEIP2_HUMAN	6	25.4864	25.0413	25.1163	25.2767	25.1509
Q9HCU4	CELR2_HUMAN	11	25.3679	25.2795	25.3537	25.2788	25.2863
Q7Z7K6	CENPV_HUMAN	5	25.9777	25.7622	25.6535	25.7332	25.7072
Q9Y6K0	CEPT1_HUMAN	3	24.1354	24.1024	24.2735	24.5037	24.3656
P27544	CERS1_HUMAN	3	25.8279	25.6056	25.4869	25.3465	25.1613
Q96G23	CERS2_HUMAN	7	28.5618	28.7939	28.7983	28.9881	28.8549
Q9HA82	CERS4_HUMAN	4	26.5794	25.8998	26.2615	26.5472	26.4222
Q8N5B7	CERS5_HUMAN	3	25.9516	25.4354	25.4241	25.6715	25.5968
Q9Y5P4	CERT_HUMAN	2	22.0184	21.7117	21.7095	21.8027	21.8568
P00450	CERU_HUMAN	9	26.2197	26.1021	25.9879	25.9738	25.8833
Q9UKY3	CES1P_HUMAN	2	28.7488	28.322	28.4135	28.4315	28.2242
Q6UWU4	CF089_HUMAN	2	23.8885	24.0669	24.0297	23.7601	23.9772
Q7Z4R8	CF120_HUMAN	2	27.228	26.907	27.1289	27.1689	27.1023
Q5T655	CFA58_HUMAN	2	22.9257	23.9757	23.79	24.047	23.7264
P08603	CFAH_HUMAN	11	25.9176	25.8158	25.7803	25.3751	25.7153
P05156	CFAI_HUMAN	6	26.2162	26.5072	26.3724	26.2489	26.423
Q9BRJ6	CG050_HUMAN	2	21.5192	21.5824	21.2896	21.2298	21.6777
P32929	CGL_HUMAN	15	28.9223	29.2296	29.1508	29.2166	29.1564
Q0VF96	CGNL1_HUMAN	2	21.1598	20.9238	20.514	21.1107	21.061
P61604	CH10_HUMAN	6	30.7448	30.9766	31.1941	31.2878	31.1982
P36222	CH3L1_HUMAN	2	23.1222	22.5648	22.4535	22.3775	22.9039
P10809	CH60_HUMAN	38	32.5006	32.7792	32.7251	32.7979	32.7553
Q6NUI6	CHADL_HUMAN	19	29.0374	29.1357	28.7995	28.9681	29.0363
Q9Y6H1	CHCH2_HUMAN	3	26.938	26.8703	27.1489	27.1867	27.0795
Q9BSY4	CHCH5_HUMAN	3	25.2295	24.856	24.9331	25.0735	24.8613
Q5T1J5	CHCH9_HUMAN	2	26.0607	26.2927	26.637	26.6415	26.5333
Q14839	CHD4_HUMAN	2	20.4299	20.9939	20.546	20.7364	20.6184
Q8NE62	CHDH_HUMAN	16	29.1863	29.1642	29.0499	29.1589	29.1164
Q9BWS9	CHID1_HUMAN	16	29.6137	29.8764	29.6562	29.689	29.7261
P15882	CHIN_HUMAN	2	21.3315	23.6386	22.7753	23.0604	24.1355
Q9UNE7	CHIP_HUMAN	3	25.4253	24.6727	24.6133	24.7015	24.7778
O43633	CHM2A_HUMAN	3	25.491	25.2281	25.4314	25.5237	25.371
Q9H444	CHM4B_HUMAN	4	26.9387	26.8199	27.1315	27.131	27.1676
Q9NZZ3	CHMP5_HUMAN	2	26.0841	26.1631	25.9945	25.741	25.834
Q96FZ7	CHMP6_HUMAN	2	23.9764	23.9041	24.6607	24.8284	24.5518
Q99653	CHP1_HUMAN	7	27.713	27.3574	27.1268	26.9982	27.2751
Q8WUD6	CHPT1_HUMAN	2	26.2932	25.8166	26.0871	26.1718	26.0157
Q9Y3Y2	CHTOP_HUMAN	1	20.5998	20.6577	21.6743	21.4832	20.9697
Q5T035	CI129_HUMAN	2	22.6248	22.595	23.1562	22.4737	22.7193
Q9Y3D0	CIA2B_HUMAN	2	22.9142	22.2949	22.1091	22.0061	22.2913
Q9Y375	CIA30_HUMAN	7	27.2938	26.3484	26.3713	26.4683	26.3033
O76071	CIAO1_HUMAN	3	23.8848	23.8179	23.7955	24.0911	23.8651
Q15642	CIP4_HUMAN	5	25.3951	25.0266	24.9887	24.9997	25.0379
Q14011	CIRBP_HUMAN	3	24.218	24.057	24.1177	23.7251	23.873
Q9NZ45	CISD1_HUMAN	7	31.8002	32.0017	32.1968	32.3418	32.1765
Q8N5K1	CISD2_HUMAN	6	30.6225	30.8775	30.7601	30.9027	30.831
O75390	CISY_HUMAN	13	30.2653	30.6138	30.5491	30.7402	30.7733
Q9H0W9	CK054_HUMAN	5	25.298	24.6237	24.658	25.1	24.935
Q96JB5	CK5P3_HUMAN	11	27.239	27.0834	27.1547	27.3114	27.2116
Q07065	CKAP4_HUMAN	30	31.7592	31.7434	31.7612	31.8163	31.747
Q14008	CKAP5_HUMAN	17	26.7717	26.3733	26.494	26.4796	26.5174
Q69YU5	CL073_HUMAN	1	23.6542	22.8287	23.3482	23.4311	23.5751
O75122	CLAP2_HUMAN	6	23.8897	23.7189	23.7837	23.3114	23.2063
P09496	CLCA_HUMAN	5	27.1619	27.2177	27.3641	27.4611	27.4005
P09497	CLCB_HUMAN	5	26.6907	26.2739	26.664	26.8169	26.6138
Q96S66	CLCC1_HUMAN	16	27.8475	27.6453	27.9057	28.0413	27.8894
P51788	CLCN2_HUMAN	7	26.384	26.5792	26.4743	26.7278	26.6477
P51790	CLCN3_HUMAN	6	26.5906	26.1861	26.3048	26.2953	26.3456
P51793	CLCN4_HUMAN	8	27.0732	26.7597	26.8998	26.8421	26.8941
P51795	CLCN5_HUMAN	3	24.782	25.1514	24.8257	24.7515	25.0691
P51797	CLCN6_HUMAN	3	22.6864	22.5419	22.1725	22.1605	22.2482
P51798	CLCN7_HUMAN	11	29.1219	29.1733	29.1127	29.1752	29.1006
Q96B33	CLD23_HUMAN	2	22.5023	23.8275	23.6288	23.7985	23.6642
O14967	CLGN_HUMAN	14	27.2304	27.3695	27.1199	27.181	27.2882
Q00610	CLH1_HUMAN	74	32.8026	32.9793	32.9469	32.9896	33.0328
P53675	CLH2_HUMAN	19	30.7072	30.956	30.836	30.8883	31.0451
O00299	CLIC1_HUMAN	6	27.0099	27.3188	27.1084	26.7803	27.1381
Q9Y696	CLIC4_HUMAN	12	29.3784	29.458	29.3172	29.4014	29.3691
Q9NZA1	CLIC5_HUMAN	2	26.9183	28.8085	28.1214	28.1739	28.4308
Q96NY7	CLIC6_HUMAN	30	34.0748	34.2498	34.1835	34.1476	34.2695
P30622	CLIP1_HUMAN	2	22.1603	21.4627	22.2274	21.9616	22.0192
Q13286	CLN3_HUMAN	2	22.6803	22.881	23.2253	23.0708	23.2584
O75503	CLN5_HUMAN	3	24.0855	24.2626	23.886	24.009	24.116
Q9NWW5	CLN6_HUMAN	2	27.92	27.6157	27.4642	27.7228	27.6703
Q96KA5	CLP1L_HUMAN	5	26.037	25.9239	25.8997	25.6189	25.8632
Q9H078	CLPB_HUMAN	10	26.6767	26.6282	26.5963	26.5936	26.6315
Q16740	CLPP_HUMAN	2	24.8779	25.1465	24.795	24.7622	25.0482
O96005	CLPT1_HUMAN	10	29.6536	30.0275	30	30.0201	30.0145
O76031	CLPX_HUMAN	9	26.0557	25.5908	25.6865	25.7268	25.6124
Q9HBJ8	CLTRN_HUMAN	4	30.2582	30.8943	30.4756	30.3929	30.8809
Q15846	CLUL1_HUMAN	4	24.1833	24.1205	24.0684	24.163	24.1359
P10909	CLUS_HUMAN	18	31.9414	31.7578	31.8902	31.8782	31.8561
Q8N0X4	CLYBL_HUMAN	7	27.9985	27.7397	27.768	27.6467	27.7261
Q96DG6	CMBL_HUMAN	3	23.3687	22.7138	23.1088	23.3223	23.2546
O75746	CMC1_HUMAN	26	30.6316	30.538	30.4917	30.5269	30.4804
Q9UJS0	CMC2_HUMAN	35	32.9425	32.9377	32.8855	32.9553	32.9172
P56277	CMC4_HUMAN	2	22.9734	22.8591	22.9123	22.6467	22.7466
Q5EBM0	CMPK2_HUMAN	3	25.3411	24.9529	24.8615	24.8779	24.9451
Q86VU5	CMTD1_HUMAN	4	24.0154	24.0433	23.9687	24.0783	24.0829
P09543	CN37_HUMAN	18	29.65	29.7086	29.6489	29.7144	29.6593
P62633	CNBP_HUMAN	3	22.9708	22.4993	22.8728	23.1077	22.5806
Q96KN2	CNDP1_HUMAN	2	22.9243	22.9852	22.7827	23.1658	22.9669
Q96KP4	CNDP2_HUMAN	19	29.435	29.8123	29.775	29.7637	29.8034
P29973	CNGA1_HUMAN	4	25.2362	24.9309	24.9008	25.082	25.036
Q14028	CNGB1_HUMAN	5	24.7747	24.3805	24.6339	24.8636	24.5264
Q9NQW8	CNGB3_HUMAN	2	21.3471	21.3979	21.8744	21.9694	21.1967
G9CGD6	CNIPF_HUMAN	4	24.7699	24.6206	24.5699	24.1305	24.3777
Q6P9H4	CNKR3_HUMAN	6	26.1512	25.314	25.3788	25.2597	25.4485
Q99439	CNN2_HUMAN	2	23.7465	23.7066	24.0318	23.6368	23.6625
Q15417	CNN3_HUMAN	10	28.28	28.182	28.0579	28.049	28.1105
Q8NE01	CNNM3_HUMAN	14	27.5441	27.7083	27.7105	27.803	27.708
Q9H9A5	CNO10_HUMAN	2	20.6104	21.6195	22.0928	21.2132	21.6157
A5YKK6	CNOT1_HUMAN	4	23.4131	22.8263	22.9763	23.0207	23.0684
Q9Y2B0	CNPY2_HUMAN	7	29.8999	30.1828	30.2697	30.2699	30.2515
Q9BT09	CNPY3_HUMAN	7	28.3298	28.3136	28.2857	28.3592	28.3843
Q8N129	CNPY4_HUMAN	5	27.0707	27.2717	27.4123	27.2846	27.3414
Q12860	CNTN1_HUMAN	23	28.3426	28.4048	28.3972	28.3995	28.4741
Q9P232	CNTN3_HUMAN	3	23.0884	22.7596	22.3698	22.5176	22.4685
P01024	CO3_HUMAN	15	28.3149	28.2355	28.1027	28.1177	28.1389
P0C0L4	CO4A_HUMAN	30	28.6696	28.1768	28.07	28.1367	28.1806
P0C0L5	CO4B_HUMAN	30	28.6622	28.149	28.0596	28.1277	28.1649
P01031	CO5_HUMAN	9	26.9705	26.6518	26.8565	26.6061	26.7439
P13671	CO6_HUMAN	11	26.5047	26.6474	26.5012	26.5607	26.5459
P12109	CO6A1_HUMAN	2	24.0383	23.1405	23.181	23.4138	23.521
P10643	CO7_HUMAN	7	26.2601	26.3275	26.4923	26.4594	26.4738
P07357	CO8A_HUMAN	5	26.1286	26.2698	26.2662	25.9911	26.2526
P27658	CO8A1_HUMAN	2	24.4462	24.6911	24.6795	24.8816	24.7497
P07358	CO8B_HUMAN	2	24.9237	23.9401	24.0462	23.4963	23.8896
P07360	CO8G_HUMAN	5	26.8624	26.8838	26.922	26.9535	27.015
P02748	CO9_HUMAN	11	29.2728	29.4851	29.3764	29.4089	29.3695
Q9Y2R0	COA3_HUMAN	4	26.9887	26.5548	26.9281	27.1122	26.9458
Q9NYJ1	COA4_HUMAN	2	25.0131	24.7744	24.7	24.7008	24.7244
Q5JTJ3	COA6_HUMAN	3	23.571	23.0558	23.3757	23.4832	23.376
Q13057	COASY_HUMAN	6	28.1145	27.7484	27.1737	26.953	26.902
P23528	COF1_HUMAN	10	29.5468	29.3564	29.3935	29.5146	29.4036
Q9Y281	COF2_HUMAN	6	27.2605	27.1803	27.3185	27.1804	27.2402
Q8WTW3	COG1_HUMAN	4	23.9158	23.6931	23.5545	23.7702	23.6895
Q14746	COG2_HUMAN	3	22.6472	22.5268	22.4288	22.216	22.4463
Q96JB2	COG3_HUMAN	2	22.8437	22.84	22.7145	22.052	22.4833
Q9H9E3	COG4_HUMAN	2	23.1695	22.787	22.6199	22.8578	22.7831
Q9UP83	COG5_HUMAN	2	22.5479	23.3639	22.8248	23.5187	22.9841
Q9Y2V7	COG6_HUMAN	2	25.5704	23.8226	24.5147	24.9808	24.9444
Q96MW5	COG8_HUMAN	2	24.6556	24.3987	24.321	24.2201	24.3119
P39060	COIA1_HUMAN	8	26.1523	26.3487	26.3605	26.4254	26.5122
Q5KU26	COL12_HUMAN	16	29.1148	28.9433	29.0258	29.127	29.067
Q86X83	COMD2_HUMAN	4	24.3015	24.0137	24.19	23.7766	24.0357
Q9UBI1	COMD3_HUMAN	4	24.7318	24.9751	24.8434	24.6862	24.9312
Q9H0A8	COMD4_HUMAN	2	23.3495	23.757	22.9844	23.0096	23.2797
Q86VX2	COMD7_HUMAN	2	24.7099	24.7926	24.9365	24.8466	25.0573
Q9NX08	COMD8_HUMAN	3	23.5299	22.9722	23.2165	22.9879	22.7309
Q9P000	COMD9_HUMAN	2	24.2293	23.8593	23.9745	24.1391	24.1327
Q9Y6G5	COMDA_HUMAN	2	22.7131	21.8918	22.4443	22.5502	22.6298
P21964	COMT_HUMAN	16	30.6847	31.0644	30.9677	30.7086	30.9846
P53621	COPA_HUMAN	35	29.8109	29.8555	29.8094	29.823	29.8709
P53618	COPB_HUMAN	21	28.4514	28.4843	28.388	28.4243	28.4829
P35606	COPB2_HUMAN	19	28.6121	28.88	28.592	28.7012	28.731
P48444	COPD_HUMAN	16	27.9785	28.3978	28.0992	27.9823	28.049
O14579	COPE_HUMAN	5	27.068	27.2174	26.746	26.781	26.8999
Q9Y678	COPG1_HUMAN	16	27.886	27.6919	27.3629	27.4324	27.3174
Q9UBF2	COPG2_HUMAN	7	26.4233	26.233	26.1273	25.8859	26.1904
O15431	COPT1_HUMAN	1	27.8936	27.7569	27.8322	27.9619	27.8529
P61923	COPZ1_HUMAN	3	25.5382	25.7006	25.4845	25.4048	25.6334
Q9NZJ6	COQ3_HUMAN	2	23.4569	22.7944	23.1873	22.4423	22.4833
Q5HYK3	COQ5_HUMAN	5	25.1956	24.8052	24.7648	24.9688	24.9424
Q9Y2Z9	COQ6_HUMAN	5	24.7623	24.9472	24.9451	25.0144	25.1403
Q8NI60	COQ8A_HUMAN	3	23.164	23.0535	22.974	22.9297	23.2685
Q96D53	COQ8B_HUMAN	2	22.4899	22.3107	22.0191	21.8811	22.006
O75208	COQ9_HUMAN	5	25.3041	25.2161	25.1715	25.2231	25.2679
Q9BR76	COR1B_HUMAN	3	25.5367	25.4074	25.5074	25.8227	25.4809
Q9ULV4	COR1C_HUMAN	5	25.1425	25.2103	25.1888	25.0876	25.1011
Q9UQ03	COR2B_HUMAN	14	27.1681	26.9098	26.9338	27.1114	27.0296
Q14019	COTL1_HUMAN	7	27.788	27.8445	27.9124	28.2727	28.061
P00395	COX1_HUMAN	2	24.7431	24.7543	24.7604	24.6922	24.9647
Q9Y6N1	COX11_HUMAN	2	24.4409	24.6172	24.1308	24.1807	24.3544
Q7KZN9	COX15_HUMAN	3	23.8009	23.6484	23.8053	23.649	23.7594
Q14061	COX17_HUMAN	6	27.0998	27.278	27.738	27.9131	27.7877
Q8N8Q8	COX18_HUMAN	3	23.6146	23.6674	23.7572	23.6056	23.7043
Q49B96	COX19_HUMAN	2	24.3745	23.4982	23.4619	23.7109	23.6203
P00403	COX2_HUMAN	3	32.3197	32.3814	32.1714	32.3553	32.3262
Q5RI15	COX20_HUMAN	5	28.571	28.9229	29.0316	29.0086	29.1519
P00414	COX3_HUMAN	2	25.5695	24.9956	24.8412	25.4863	25.2569
P13073	COX41_HUMAN	12	32.5464	32.5218	32.6823	32.8751	32.7091
P20674	COX5A_HUMAN	6	30.3208	30.6241	30.6018	30.5705	30.626
P10606	COX5B_HUMAN	4	31.5368	31.3395	31.4584	31.5817	31.4801
P09669	COX6C_HUMAN	6	30.7256	30.5807	30.6398	30.8032	30.7436
P15954	COX7C_HUMAN	2	27.5489	27.8011	27.9743	28.1588	28.1388
O14548	COX7R_HUMAN	6	27.3311	26.8023	27.0247	27.0284	27.0383
Q7Z7K0	COXM1_HUMAN	2	24.3248	23.6795	23.9171	23.9346	23.6126
Q9UPN4	CP131_HUMAN	6	26.8148	26.3561	26.0761	26.3083	26.3229
Q6UW02	CP20A_HUMAN	16	28.4941	28.1307	28.1823	28.1563	28.1385
Q02318	CP27A_HUMAN	18	30.9565	30.7544	30.7141	30.7133	30.6683
Q7Z449	CP2U1_HUMAN	8	26.1013	25.9969	25.9486	25.9126	26.014
P78329	CP4F2_HUMAN	4	24.8532	24.3184	24.3528	24.5374	24.477
Q08477	CP4F3_HUMAN	3	24.1139	23.7003	23.5152	23.7854	23.8953
Q9HBI6	CP4FB_HUMAN	6	25.0209	24.5145	24.5973	24.7094	24.6881
Q9HCS2	CP4FC_HUMAN	3	24.1139	23.7003	23.5152	23.7854	23.8953
Q6ZWL3	CP4V2_HUMAN	16	28.2482	28.3354	28.388	28.5489	28.378
Q16850	CP51A_HUMAN	20	30.2637	30.4487	30.4806	30.5863	30.5665
O75881	CP7B1_HUMAN	11	27.8068	27.486	27.5134	27.4183	27.5518
Q17RY0	CPEB4_HUMAN	2	22.1441	22.1016	22.0755	22.3797	21.5498
Q99829	CPNE1_HUMAN	2	23.2267	23.4017	22.4129	22.4746	22.7837
O75131	CPNE3_HUMAN	12	28.4293	28.4182	28.418	28.4672	28.5586
Q9HCH3	CPNE5_HUMAN	2	26.3348	26.5392	26.333	26.2149	26.6204
Q86YQ8	CPNE8_HUMAN	4	26.7361	26.8535	26.6264	26.5991	26.8876
P04632	CPNS1_HUMAN	5	25.3511	25.3018	25.3241	25.5581	25.4682
Q96L46	CPNS2_HUMAN	2	24.9727	24.5649	24.4283	24.5368	24.5947
Q9BRF8	CPPED_HUMAN	2	25.5194	25.0977	25.0575	25.3129	25.2155
O43809	CPSF5_HUMAN	2	23.8728	24.4204	23.7813	24.0085	23.3904
P50416	CPT1A_HUMAN	25	30.5193	30.735	30.7883	30.9053	30.8849
Q92523	CPT1B_HUMAN	5	24.8219	24.5338	24.4583	24.3922	24.5922
Q8TCG5	CPT1C_HUMAN	7	26.3386	26.2488	26.0821	26.046	26.1776
P23786	CPT2_HUMAN	32	31.3404	31.4436	31.4759	31.5618	31.5081
Q9H3G5	CPVL_HUMAN	12	29.2726	29.3259	29.2765	29.303	29.3299
Q9BSJ5	CQ080_HUMAN	2	23.2461	22.6386	23.1697	23.0441	22.7851
Q8TCD1	CR032_HUMAN	2	24.6866	24.6492	24.8231	25.0895	25.0714
Q6ZU35	CRACD_HUMAN	3	23.0584	22.9077	22.9522	22.8044	23.1895
Q9Y4K1	CRBG1_HUMAN	18	27.1148	27.1199	27.1057	27.078	27.0398
Q96HD1	CREL1_HUMAN	13	28.5567	28.4086	28.449	28.4903	28.3024
Q6UXH1	CREL2_HUMAN	2	22.6531	23.4201	23.4216	23.2989	23.3612
P46108	CRK_HUMAN	4	23.6007	23.3603	23.5785	23.8875	23.668
P46109	CRKL_HUMAN	3	24.796	24.8918	24.9304	25.0184	25.1435
Q5TZA2	CROCC_HUMAN	4	23.6054	23.1495	23.036	23.0402	23.428
O75718	CRTAP_HUMAN	9	27.4259	27.161	26.9984	27.1957	27.1496
Q5IJ48	CRUM2_HUMAN	13	26.7193	26.7503	26.4802	26.423	26.5907
Q9BUF7	CRUM3_HUMAN	1	23.5893	23.1383	23.595	23.8944	23.6628
O43186	CRX_HUMAN	2	24.5448	24.0974	24.3895	24.1573	24.1217
P02489	CRYAA_HUMAN	4	24.098	24.6961	24.7994	25.2198	24.8114
P02511	CRYAB_HUMAN	11	32.1186	32.2255	32.0189	32.3176	32.1769
Q9Y2S2	CRYL1_HUMAN	5	24.696	24.8307	24.9892	24.7595	25.0205
Q14894	CRYM_HUMAN	2	24.6007	24.8685	24.5583	24.0511	24.3887
Q9UFG5	CS025_HUMAN	2	25.0314	25.2363	25.3102	24.8511	25.1004
O94886	CSCL1_HUMAN	3	26.0544	25.6923	25.7783	25.9431	25.8047
Q5T3F8	CSCL2_HUMAN	5	25.9419	25.8011	25.7993	26.0861	26.0743
O75534	CSDE1_HUMAN	6	25.0645	24.7578	24.8283	24.8505	24.9272
P07333	CSF1R_HUMAN	3	23.7996	23.5839	23.4461	23.1064	23.2125
P68400	CSK21_HUMAN	7	27.1829	26.9294	26.8507	26.7002	26.8582
P19784	CSK22_HUMAN	4	24.7145	24.3903	24.4503	24.3122	24.3704
Q8NEV1	CSK23_HUMAN	7	27.1829	26.9294	26.8507	26.7002	26.8582
P67870	CSK2B_HUMAN	3	24.8915	24.3894	24.7368	24.2302	24.214
Q8WXD9	CSKI1_HUMAN	4	23.8851	23.7428	23.7869	24.0951	24.1274
O14936	CSKP_HUMAN	12	25.8249	25.5849	25.5246	25.8084	25.6481
Q13098	CSN1_HUMAN	2	23.5431	23.6083	23.5728	23.6341	23.7281
P61201	CSN2_HUMAN	4	25.1012	24.8911	24.8548	24.9648	25.0896
Q9UNS2	CSN3_HUMAN	4	24.7487	24.9103	24.3758	24.1806	24.5172
Q9BT78	CSN4_HUMAN	6	25.7774	25.781	25.6978	25.6946	25.8001
Q92905	CSN5_HUMAN	2	23.101	22.6706	22.7137	23.0743	22.8046
Q7L5N1	CSN6_HUMAN	3	23.2826	23.0059	23.2761	23.2225	22.8253
Q9UBW8	CSN7A_HUMAN	2	23.921	23.3255	23.5151	23.3858	23.4766
Q99627	CSN8_HUMAN	3	26.1578	26.0625	25.9134	26.0698	26.1428
O95196	CSPG5_HUMAN	6	28.5284	28.5871	28.7256	28.6063	28.6807
Q1MSJ5	CSPP1_HUMAN	1	16.7046	15.7853	17.5851	17.6027	17.1098
P21291	CSRP1_HUMAN	5	25.9884	26.1478	26.3114	26.384	26.0831
Q8WYA6	CTBL1_HUMAN	2	22.845	22.4876	22.1371	22.5864	22.6128
Q13363	CTBP1_HUMAN	4	24.2734	24.4611	24.4036	24.4886	24.4249
Q96RT6	CTGE2_HUMAN	3	25.8316	25.4664	25.542	25.4685	25.4912
Q8IX95	CTGE3_HUMAN	2	24.7689	24.4873	24.3595	24.3089	24.294
Q8IX94	CTGE4_HUMAN	2	27.7126	26.2324	25.9258	25.8507	25.6302
Q86UF2	CTGE6_HUMAN	2	27.9455	26.6743	26.3493	26.5102	26.3666
A4FU28	CTGE9_HUMAN	2	27.929	26.6686	26.5153	26.5762	26.3989
Q8WWI5	CTL1_HUMAN	7	26.4153	26.637	26.5974	26.8294	26.6878
Q8IWA5	CTL2_HUMAN	12	28.164	28.0424	28.023	28.0908	28.0904
Q8N4M1	CTL3_HUMAN	2	22.8089	22.6353	22.5403	22.4798	22.773
P35221	CTNA1_HUMAN	44	31.4687	31.6086	31.5741	31.6364	31.7131
P26232	CTNA2_HUMAN	9	28.3088	27.8207	28.0266	28.0682	27.9111
P35222	CTNB1_HUMAN	26	30.675	30.6682	30.7496	30.7566	30.7575
O60716	CTND1_HUMAN	25	28.5208	28.7389	28.7799	28.7514	28.8096
Q9UQB3	CTND2_HUMAN	7	25.2475	25.0794	25.0287	25.0039	25.0458
Q9UBT7	CTNL1_HUMAN	17	26.9016	26.6468	26.794	26.8019	26.8115
P52569	CTR2_HUMAN	9	27.1897	27.3548	27.2213	27.5687	27.3979
Q13616	CUL1_HUMAN	2	24.522	23.3876	23.5907	23.6693	23.0696
Q13618	CUL3_HUMAN	2	21.1386	22.2918	21.6771	22.1446	21.4253
Q13619	CUL4A_HUMAN	5	23.3181	22.7263	22.7059	22.8595	22.5942
Q13620	CUL4B_HUMAN	3	22.9886	22.221	22.2076	22.3987	21.9986
Q93034	CUL5_HUMAN	3	23.4124	23.1746	23.2893	23.7473	23.5619
Q8IWT3	CUL9_HUMAN	3	23.2001	22.9751	22.6155	22.4596	22.6133
O60888	CUTA_HUMAN	2	26.1974	26.7387	25.9074	26.406	26.6758
P39880	CUX1_HUMAN	2	22.2852	23.0693	22.2907	22.532	23.2091
P12074	CX6A1_HUMAN	1	22.5859	24.9415	25.2589	24.8917	24.7697
P14854	CX6B1_HUMAN	3	31.7454	32.0976	31.9796	32.0207	32.0227
P24310	CX7A1_HUMAN	2	27.8714	28.2204	27.6543	27.7113	28.2088
P14406	CX7A2_HUMAN	2	31.4659	31.8514	31.1347	31.2129	31.3883
P17302	CXA1_HUMAN	14	28.3729	28.4873	28.5673	28.6602	28.5352
P78310	CXAR_HUMAN	7	25.8299	25.8005	25.8136	25.8773	25.8411
P08574	CY1_HUMAN	12	31.4908	31.4131	31.2965	31.4588	31.4396
P00167	CYB5_HUMAN	5	31.019	30.9722	31.2762	31.3861	31.236
O43169	CYB5B_HUMAN	7	29.8018	30.1454	30.0861	29.9775	30.0844
Q9BQA9	CYBC1_HUMAN	3	26.6952	26.79	26.7657	27.0979	26.8877
Q9HB71	CYBP_HUMAN	5	25.9194	25.6083	25.7004	25.5995	25.4661
Q53TN4	CYBR1_HUMAN	2	22.1627	22.0126	22.5443	22.5767	22.3369
P99999	CYC_HUMAN	7	27.8381	27.7221	27.6752	27.5833	27.76
Q7L576	CYFP1_HUMAN	12	27.1949	27.2712	27.2327	27.3369	27.3659
Q96F07	CYFP2_HUMAN	18	27.5364	27.5877	27.5049	27.5622	27.5271
Q9NUQ9	CYRIB_HUMAN	4	25.1628	23.832	24.0641	23.7743	23.6856
P04080	CYTB_HUMAN	3	29.5445	29.5208	29.775	29.9525	29.8522
P01034	CYTC_HUMAN	8	30.9134	30.6371	30.7838	30.9168	30.7344
Q9H1C7	CYTM1_HUMAN	2	25.2054	24.6668	25.0163	25.2045	25.1443
Q9NWV4	CZIB_HUMAN	1	23.1294	23.6799	23.6072	23.4743	23.748
Q2PZI1	D19L1_HUMAN	3	23.3935	23.0307	23.6122	23.5414	23.2066
Q6ZPD9	D19L3_HUMAN	9	27.0475	27.0415	27.0135	27.1882	27.0467
Q8N465	D2HDH_HUMAN	2	24.3717	24.2607	24.3214	23.837	24.2724
Q9NRG7	D39U1_HUMAN	5	25.065	24.9954	24.9978	24.913	25.0394
Q9Y4D1	DAAM1_HUMAN	17	27.5	27.1827	27.1327	27.1356	27.1753
P61803	DAD1_HUMAN	3	29.4378	28.982	29.2212	29.332	29.112
P08174	DAF_HUMAN	4	25.8697	24.9755	25.1885	25.3363	25.029
Q14118	DAG1_HUMAN	3	26.0966	26.081	26.0295	25.6496	26.0887
Q9NR28	DBLOH_HUMAN	5	26.6634	26.3389	26.4417	26.4035	26.3066
Q9UJU6	DBNL_HUMAN	6	26.1255	26.3189	26.0712	26.1003	26.1085
O14576	DC1I1_HUMAN	4	24.6828	24.7452	24.3842	24.4107	24.4602
Q13409	DC1I2_HUMAN	3	21.5578	22.1142	22.4015	22.3179	22.729
Q9Y6G9	DC1L1_HUMAN	7	26.486	26.5329	26.5046	26.5065	26.511
O43237	DC1L2_HUMAN	2	23.6937	23.2481	23.2087	23.0734	23.0606
P61962	DCAF7_HUMAN	2	23.9753	24.108	23.3066	23.7251	23.6957
Q5TAQ9	DCAF8_HUMAN	3	22.9817	23.2943	23.6591	23.3032	23.2606
Q8WVC6	DCAKD_HUMAN	14	29.2005	28.9501	29.0507	29.1991	29.0896
Q96PD2	DCBD2_HUMAN	2	21.8356	22.2783	22.0794	20.9093	22.1064
O95822	DCMC_HUMAN	17	28.694	28.6611	28.7826	28.7631	28.7269
Q96C86	DCPS_HUMAN	2	23.0079	22.0018	22.0176	21.8465	21.276
P32321	DCTD_HUMAN	2	20.6589	21.5697	21.5192	21.3337	20.8917
Q14203	DCTN1_HUMAN	18	27.2651	27.0438	27.0735	27.0329	27.0535
Q13561	DCTN2_HUMAN	8	27.2048	26.9911	26.7107	26.6735	26.7193
O75935	DCTN3_HUMAN	2	23.6947	23.1678	23.4779	23.6631	23.516
O00399	DCTN6_HUMAN	2	24.971	24.3014	24.9202	24.7484	25.1469
P06132	DCUP_HUMAN	2	22.3476	23.1021	22.0575	22.4657	22.8136
Q7Z4W1	DCXR_HUMAN	9	29.119	29.3756	29.4556	29.4313	29.3597
Q9NUU7	DD19A_HUMAN	5	24.4081	24.3347	24.3401	24.2946	24.364
Q9UMR2	DD19B_HUMAN	6	24.8825	25.1341	24.9731	25.0268	25.0139
O94760	DDAH1_HUMAN	5	27.2246	26.9353	27.0828	27.1606	27.0788
O95865	DDAH2_HUMAN	3	25.0528	25.2843	25.2846	25.1609	25.1918
Q16531	DDB1_HUMAN	15	26.4997	26.1983	26.1845	26.2576	26.2933
O94830	DDHD2_HUMAN	2	21.1089	21.4537	20.8757	21.1591	21.371
Q16832	DDR2_HUMAN	6	25.4738	25.0243	25.0199	24.9588	24.8175
Q96HY6	DDRGK_HUMAN	7	27.3423	27.5444	27.443	27.2298	27.3069
A6NHG4	DDTL_HUMAN	3	24.9694	24.4122	24.4473	24.6524	24.65
Q92499	DDX1_HUMAN	18	27.5869	27.7182	27.5779	27.6602	27.64
Q92841	DDX17_HUMAN	13	27.9055	27.9782	27.9885	28.14	28.1188
Q9NR30	DDX21_HUMAN	2	22.4932	22.0399	21.5831	21.6825	21.8183
O00571	DDX3X_HUMAN	14	27.5441	27.6309	27.7038	27.6847	27.7786
O15523	DDX3Y_HUMAN	8	26.9111	26.897	27.0594	27.0679	27.1113
Q7L014	DDX46_HUMAN	2	21.4599	21.1403	20.8353	20.4327	20.6682
P17844	DDX5_HUMAN	15	28.7357	28.66	28.7492	28.9853	28.8841
Q86TM3	DDX53_HUMAN	1	19.6223	19.626	19.7705	17.9948	18.3621
P26196	DDX6_HUMAN	6	25.5443	25.414	25.344	25.3813	25.4264
Q6NSW5	DE10B_HUMAN	2	23.9514	23.4773	23.2003	23.3218	23.2657
Q16698	DECR_HUMAN	6	29.0167	29.1835	29.0916	29.1855	29.1596
Q9NUI1	DECR2_HUMAN	7	26.8553	26.7198	26.7173	26.8641	26.7786
P59666	DEF3_HUMAN	2	25.4563	24.9672	25.5288	25.5543	25.5076
Q9HBH1	DEFM_HUMAN	2	24.4599	24.4956	24.1226	24.2537	24.4253
O15121	DEGS1_HUMAN	3	24.5296	25.0328	24.413	23.9953	24.5903
P35659	DEK_HUMAN	3	23.126	22.555	22.6248	22.98	22.7347
Q8TCE6	DEN10_HUMAN	3	25.3014	24.6939	24.5331	24.6309	24.6333
A4D1U4	DEN11_HUMAN	3	23.3259	22.9267	23.0058	23.0536	23.0417
Q5VZ89	DEN4C_HUMAN	6	24.1856	24.3668	23.9807	23.9057	23.9046
O43583	DENR_HUMAN	2	23.6791	23.6097	23.469	22.7037	23.0604
Q9Y315	DEOC_HUMAN	3	23.2352	22.8376	22.7818	22.7205	22.8501
O75140	DEPD5_HUMAN	4	24.0691	23.9051	23.6028	23.5469	23.7206
Q9BUN8	DERL1_HUMAN	2	24.8359	24.964	24.3448	24.4756	24.6274
Q9GZP9	DERL2_HUMAN	2	27.0651	27.2575	27.2588	26.8778	27.1636
P17661	DESM_HUMAN	3	27.0509	26.7615	26.9541	27.2715	27.1619
P15924	DESP_HUMAN	4	23.5199	23.2985	23.2744	22.8815	23.0653
P60981	DEST_HUMAN	5	25.4892	25.429	25.4243	25.4004	25.203
O00273	DFFA_HUMAN	2	21.5861	20.9565	21.0837	21.1371	21.54
O75907	DGAT1_HUMAN	2	23.3535	23.234	23.489	23.6516	23.5519
P52429	DGKE_HUMAN	12	28.6579	28.8474	28.8719	28.8294	28.7964
Q8NCG7	DGLB_HUMAN	2	22.262	21.9392	22.0364	21.0863	21.8868
Q8NBQ5	DHB11_HUMAN	8	25.6063	25.3943	25.391	25.6782	25.6556
Q53GQ0	DHB12_HUMAN	21	32.8073	33.0784	32.9738	33.0181	33.1239
P37059	DHB2_HUMAN	4	24.9177	24.9822	24.8498	25.1198	24.8247
P51659	DHB4_HUMAN	40	33.3473	33.5114	33.5209	33.5111	33.5378
P56937	DHB7_HUMAN	8	27.0162	27.0876	27.0021	27.024	27.1456
Q92506	DHB8_HUMAN	5	27.5049	27.0952	27.3031	27.4606	27.4005
Q15392	DHC24_HUMAN	4	24.18	23.9796	24.0526	23.9328	24.1796
Q9UBM7	DHCR7_HUMAN	8	30.8299	30.9655	30.9173	31.0095	31.1538
P00367	DHE3_HUMAN	26	33.4438	33.5709	33.5132	33.6261	33.5876
P49448	DHE4_HUMAN	28	32.6478	32.691	32.7645	32.8994	32.8085
P09417	DHPR_HUMAN	7	27.9718	27.8932	27.9806	28.0081	27.9274
Q6UX07	DHR13_HUMAN	7	28.3659	27.847	27.8949	28.0188	27.7359
Q96LJ7	DHRS1_HUMAN	7	26.6844	27.0784	26.8931	26.7025	27.0828
O75911	DHRS3_HUMAN	13	32.4019	32.3924	32.4758	32.6136	32.5392
Q9BTZ2	DHRS4_HUMAN	8	26.8733	27.2224	27.3888	27.5303	27.3026
Q9Y394	DHRS7_HUMAN	3	26.523	26.1951	26.0877	26.2546	26.3358
Q8N5I4	DHRSX_HUMAN	2	25.3516	25.7014	25.9584	25.8393	25.9355
O14521	DHSD_HUMAN	2	24.0972	24.1244	24.6416	24.6811	24.5427
Q00796	DHSO_HUMAN	6	26.2286	26.2557	25.9645	25.8433	26.0491
Q96HY7	DHTK1_HUMAN	11	25.8784	26.2541	25.9775	25.789	26.0545
O43143	DHX15_HUMAN	5	25.396	25.1729	25.1022	25.2336	25.0903
Q7Z478	DHX29_HUMAN	2	21.5107	21.3406	20.6208	21.1956	20.8505
Q7L2E3	DHX30_HUMAN	8	25.8974	26.1678	26.1127	26.282	26.3782
Q7L7V1	DHX32_HUMAN	2	21.1669	21.735	21.4792	21.285	21.6123
Q08211	DHX9_HUMAN	19	27.9712	27.9255	27.8144	27.7102	27.8653
Q01459	DIAC_HUMAN	2	23.1844	20.5559	20.6306	21.4769	21.1761
Q9UBX3	DIC_HUMAN	7	29.4214	29.3915	29.3102	29.35	29.2734
Q14689	DIP2A_HUMAN	2	23.3436	22.7065	22.6849	22.5623	23.1074
Q9P265	DIP2B_HUMAN	2	22.0153	21.4907	21.6961	21.9099	21.4041
Q9Y2E4	DIP2C_HUMAN	3	23.7972	23.6115	23.6919	22.9459	23.7709
Q9UBS4	DJB11_HUMAN	12	31.4735	31.3768	31.4086	31.5038	31.4697
Q9NXW2	DJB12_HUMAN	4	24.1923	24.4963	24.5784	24.8168	24.7448
Q8TBM8	DJB14_HUMAN	2	24.0539	23.4736	23.7306	23.6231	23.6568
Q8IXB1	DJC10_HUMAN	18	29.3555	29.4911	29.2965	29.2856	29.3708
Q9NVH1	DJC11_HUMAN	9	27.8216	28.3128	28.0077	27.9832	28.2176
O75165	DJC13_HUMAN	8	25.5234	25.1122	25.1691	25.2814	25.1817
Q9Y2G8	DJC16_HUMAN	2	22.8411	22.5559	22.6157	22.5068	22.7708
Q9H1X3	DJC25_HUMAN	4	25.1273	24.6901	25.1117	25.2278	25.013
O60832	DKC1_HUMAN	7	25.774	25.7517	25.5235	25.5168	25.5186
Q9UBP4	DKK3_HUMAN	2	23.5355	23.3479	23.886	23.1705	23.3401
P09622	DLDH_HUMAN	16	31.2608	31.2217	31.344	31.4784	31.4175
Q12959	DLG1_HUMAN	18	27.4248	27.2214	27.2559	27.295	27.2715
Q15700	DLG2_HUMAN	2	24.554	24.9867	24.8488	24.9563	24.966
Q92796	DLG3_HUMAN	4	27.059	25.8811	25.4584	25.53	25.2509
P78352	DLG4_HUMAN	2	24.1896	24.3073	24.015	23.9651	24.3118
Q9NP97	DLRB1_HUMAN	3	26.3829	26.7873	26.7246	26.6933	26.6741
Q8TF09	DLRB2_HUMAN	2	25.9644	26.3075	26.3464	26.4499	26.2556
Q8NFW5	DMBX1_HUMAN	2	24.5257	23.9558	24.3053	24.268	24.1583
P11532	DMD_HUMAN	17	28.6269	28.6991	28.5949	28.5598	28.6597
Q9Y485	DMXL1_HUMAN	15	26.2459	26.3117	26.2311	26.2862	26.472
Q8TDJ6	DMXL2_HUMAN	3	23.4047	23.1915	22.7336	23.0749	23.2188
P31689	DNJA1_HUMAN	7	25.2812	25.0026	25.174	25.0632	25.2489
O60884	DNJA2_HUMAN	10	27.9127	28.0757	27.9125	27.8071	27.9062
Q96EY1	DNJA3_HUMAN	10	27.6796	28.039	27.8124	27.9368	27.9535
P25685	DNJB1_HUMAN	5	25.1768	25.7512	24.868	25.1553	25.1014
Q96KC8	DNJC1_HUMAN	2	23.0668	23.8722	23.7345	23.3813	23.5638
Q13217	DNJC3_HUMAN	23	30.3337	30.3042	30.3919	30.4451	30.392
Q9H3Z4	DNJC5_HUMAN	7	29.0394	28.8197	29.1207	29.2142	29.0205
Q99615	DNJC7_HUMAN	4	24.2141	23.6514	23.8829	23.8518	23.7642
O00429	DNM1L_HUMAN	7	24.4956	24.5124	24.237	24.329	24.4265
Q9ULA0	DNPEP_HUMAN	4	25.3861	24.7831	25.1238	24.954	24.7835
Q14185	DOCK1_HUMAN	2	24.6459	24.6853	24.1074	23.851	24.4195
Q9H7D0	DOCK5_HUMAN	16	26.4067	26.2431	25.9955	25.961	26.1075
Q96HP0	DOCK6_HUMAN	2	24.2241	23.964	23.7343	24.1368	23.919
Q96N67	DOCK7_HUMAN	35	28.5166	28.5234	28.3652	28.4189	28.5122
P30046	DOPD_HUMAN	3	24.9694	24.4122	24.4473	24.6524	24.65
Q9UKG1	DP13A_HUMAN	3	23.2291	23.0827	23.3496	23.5027	23.6028
Q8NEU8	DP13B_HUMAN	17	27.527	27.4138	27.442	27.4475	27.4508
O60762	DPM1_HUMAN	15	30.1268	30.0908	30.0792	30.1192	30.1294
Q9P2X0	DPM3_HUMAN	2	25.4072	24.8756	25.415	25.5115	25.382
P54098	DPOG1_HUMAN	1	19.2658	18.5583	18.733	17.9229	18.9858
Q9UHL4	DPP2_HUMAN	8	27.9852	27.883	27.9653	27.9201	27.8847
Q9NY33	DPP3_HUMAN	3	25.1083	24.7287	24.9948	25.3484	24.942
Q86TI2	DPP9_HUMAN	2	22.8404	22.5839	22.799	23.2144	22.9978
Q9C005	DPY30_HUMAN	1	18.6251	18.7983	19.4935	18.8303	19.2986
Q14194	DPYL1_HUMAN	2	25.6085	25.4765	25.6843	25.829	25.5838
Q16555	DPYL2_HUMAN	13	27.8616	27.8006	27.8572	27.9389	27.7971
Q14195	DPYL3_HUMAN	7	26.1338	25.924	25.7716	25.882	25.9183
P01909	DQA1_HUMAN	2	23.3401	23.8881	23.0352	22.9334	23.4788
P0CG22	DR4L1_HUMAN	3	26.1523	26.5345	26.7383	26.8797	26.5914
Q6PKH6	DR4L2_HUMAN	2	23.6873	24.0802	24.2749	24.0067	24.1075
P01903	DRA_HUMAN	6	29.0353	29.1719	28.8457	28.8425	28.9487
P01911	DRB_HUMAN	7	27.2241	27.0311	26.671	26.7106	26.6711
P79483	DRB3_HUMAN	2	26.4316	26.7291	26.0582	26.0828	25.9538
Q30154	DRB5_HUMAN	3	26.9627	27.0038	26.9294	26.8411	26.9153
Q16643	DREB_HUMAN	7	26.7001	25.9129	26.633	26.6195	26.4985
Q9Y295	DRG1_HUMAN	4	25.4378	25.2881	25.1513	25.2422	25.2322
Q6IAN0	DRS7B_HUMAN	10	30.1737	30.2664	30.2585	30.3593	30.3778
Q14126	DSG2_HUMAN	6	26.1769	26.1326	25.9871	25.8536	26.1303
P55265	DSRAD_HUMAN	12	26.4097	26.6917	26.4983	26.5382	26.6115
Q96EV8	DTBP1_HUMAN	2	23.8653	23.2702	23.3863	23.3408	23.1909
Q9Y4J8	DTNA_HUMAN	15	27.4122	27.2601	27.3119	27.3554	27.1934
O60941	DTNB_HUMAN	10	27.1881	26.9919	26.8416	26.8429	26.768
Q8N9I9	DTX3_HUMAN	1	21.031	21.1786	20.4486	19.9663	20.3934
P51452	DUS3_HUMAN	2	22.9507	23.6644	22.8568	22.033	22.8019
P33316	DUT_HUMAN	6	26.0604	25.9171	25.8107	25.8545	25.8991
O00148	DX39A_HUMAN	5	25.9974	25.6737	25.9486	26.0586	25.9868
Q13838	DX39B_HUMAN	8	26.4114	26.2761	26.4341	26.4181	26.3553
Q9P2D7	DYH1_HUMAN	2	21.4067	20.3848	21.2931	21.1541	21.5938
Q14204	DYHC1_HUMAN	114	30.7439	30.6056	30.5885	30.6165	30.6481
P63167	DYL1_HUMAN	2	27.6421	27.4448	27.486	27.5102	27.4315
Q96FJ2	DYL2_HUMAN	4	28.2936	27.6631	27.6252	27.537	27.4918
Q7RTS9	DYM_HUMAN	2	22.343	22.553	21.6709	22.3617	21.3842
Q05193	DYN1_HUMAN	3	24.6309	24.5942	24.644	24.7228	24.6216
P50570	DYN2_HUMAN	10	26.014	25.9703	25.9584	26.0685	25.9625
Q9UQ16	DYN3_HUMAN	2	24.03	23.9733	23.8852	24.133	24.0134
Q03001	DYST_HUMAN	2	22.822	22.2384	21.7061	21.8244	22.411
P19525	E2AK2_HUMAN	3	24.0567	23.3048	23.4316	23.422	23.5255
Q9H4G0	E41L1_HUMAN	16	28.2927	28.0592	28.1186	28.0808	28.0874
O43491	E41L2_HUMAN	12	25.8925	25.579	25.8039	25.7271	25.75
Q9Y2J2	E41L3_HUMAN	13	27.0566	25.6961	25.9965	26.1096	26.0194
Q9HCM4	E41L5_HUMAN	5	24.319	23.9483	23.911	23.9522	23.9427
Q9HCS5	E41LA_HUMAN	2	23.0361	23.2829	23.3829	22.593	22.9293
Q9H329	E41LB_HUMAN	2	22.7783	22.746	22.4154	22.36	22.7895
P43003	EAA1_HUMAN	5	27.3002	27.3205	27.1819	27.0442	27.2046
Q15125	EBP_HUMAN	3	29.648	30.2228	30.151	30.2794	30.2759
Q99848	EBP2_HUMAN	2	30.0448	29.3826	29.3646	29.4869	29.3656
Q13011	ECH1_HUMAN	15	30.551	30.677	30.5651	30.6894	30.6801
P40939	ECHA_HUMAN	37	33.4348	33.4853	33.4	33.3318	33.3663
P55084	ECHB_HUMAN	23	32.5565	32.5924	32.4727	32.6001	32.583
Q9NTX5	ECHD1_HUMAN	12	28.824	29.038	28.9169	28.9986	29.011
Q86YB7	ECHD2_HUMAN	10	28.1494	28.3804	28.0602	28.3262	28.2766
Q96DC8	ECHD3_HUMAN	7	28.2163	28.349	28.4349	28.5245	28.463
P30084	ECHM_HUMAN	17	30.1344	30.387	30.4177	30.4677	30.4255
Q08426	ECHP_HUMAN	47	33.3901	33.5314	33.5492	33.5805	33.5791
P42126	ECI1_HUMAN	7	29.2886	29.5526	29.4071	29.4457	29.5702
O75521	ECI2_HUMAN	18	29.5274	29.7333	29.6543	29.6512	29.6527
Q5VYK3	ECM29_HUMAN	6	23.73	24.4195	25.2674	25.453	25.1476
Q9BQ95	ECSIT_HUMAN	6	25.9267	25.7442	25.8581	25.8238	25.8117
Q6P2E9	EDC4_HUMAN	7	25.1717	24.8165	24.6708	24.9021	24.8788
Q9BZQ6	EDEM3_HUMAN	2	22.7325	22.3313	22.0771	21.5247	22.4584
O43854	EDIL3_HUMAN	6	24.9512	25.0774	24.7478	24.6731	24.9981
Q15075	EEA1_HUMAN	7	26.0229	25.7577	25.6496	25.5185	25.6372
Q05639	EF1A2_HUMAN	6	31.3175	31.1649	31.2969	31.3835	31.3442
Q5VTE0	EF1A3_HUMAN	18	32.872	32.9859	32.8959	32.8685	32.9352
P24534	EF1B_HUMAN	3	28.2442	28.5666	28.4392	28.4182	28.5717
P29692	EF1D_HUMAN	7	29.0372	28.8712	28.9548	29.0484	28.9691
P26641	EF1G_HUMAN	12	30.1549	29.8127	30.0066	29.9814	29.8869
P13639	EF2_HUMAN	31	29.8244	29.7135	29.7942	29.8932	29.8171
Q96RP9	EFGM_HUMAN	9	26.7335	26.8754	26.5824	26.644	26.8689
Q7Z2Z2	EFL1_HUMAN	2	21.2737	21.9734	21.1293	20.8159	21.2814
P98172	EFNB1_HUMAN	2	23.1905	22.5124	22.8618	23.2613	22.6629
Q8N6R0	EFNMT_HUMAN	2	22.5846	23.2227	23.004	22.7869	23.1147
Q14156	EFR3A_HUMAN	10	26.6371	26.4885	26.4824	26.7859	26.5874
Q9Y2G0	EFR3B_HUMAN	20	29.4489	29.5557	29.4467	29.6229	29.649
P43897	EFTS_HUMAN	6	26.6784	26.2978	26.4946	26.6475	26.6376
P49411	EFTU_HUMAN	20	31.0915	31.0965	31.1754	31.2564	31.207
P00533	EGFR_HUMAN	18	28.1649	28.2377	28.2251	28.2465	28.2729
Q9H4M9	EHD1_HUMAN	7	25.6994	25.6333	25.5544	25.4867	25.5264
Q9NZN3	EHD3_HUMAN	7	25.2937	25.0956	25.0569	25.0066	25.1599
Q9H223	EHD4_HUMAN	5	25.0177	24.6678	24.6826	24.666	24.8445
O14681	EI24_HUMAN	2	24.6927	24.157	24.2578	24.2489	24.3555
P49770	EI2BB_HUMAN	2	23.932	23.8796	23.4925	23.188	23.6636
Q9UI10	EI2BD_HUMAN	3	22.9196	21.8941	22.3469	22.4056	22.0932
Q13144	EI2BE_HUMAN	4	24.6519	24.9889	24.9244	25.1633	24.8431
Q9NR50	EI2BG_HUMAN	2	23.1223	23.5003	23.2349	22.6674	23.2596
O60739	EIF1B_HUMAN	3	24.1815	23.6667	23.742	23.8309	23.8882
Q9BY44	EIF2A_HUMAN	3	24.3055	23.5343	23.6775	23.7647	23.7104
Q14152	EIF3A_HUMAN	13	27.0671	27.8268	27.1189	27.3866	27.6923
P55884	EIF3B_HUMAN	4	25.5039	25.53	25.3369	25.3481	25.5313
Q99613	EIF3C_HUMAN	5	25.778	25.8964	26.0215	26.0903	25.9409
O15371	EIF3D_HUMAN	7	24.8647	24.9995	24.8571	24.5288	24.529
P60228	EIF3E_HUMAN	5	25.0588	24.5644	24.6352	24.6897	24.6605
O00303	EIF3F_HUMAN	5	25.8659	25.999	26.1995	26.2568	26.2579
O75821	EIF3G_HUMAN	3	23.9932	24.3057	23.6729	23.8663	23.8381
Q13347	EIF3I_HUMAN	3	23.4349	23.3062	23.0662	23.2264	23.4732
Q9UBQ5	EIF3K_HUMAN	2	24.1585	23.8105	23.7604	23.5263	23.8956
Q9Y262	EIF3L_HUMAN	6	25.3555	25.5519	25.2683	25.3209	25.3594
Q7L2H7	EIF3M_HUMAN	5	24.074	24.2873	24.1768	23.8106	23.8417
Q9HBU6	EKI1_HUMAN	3	22.5067	22.5191	22.2925	21.9163	22.3203
Q15717	ELAV1_HUMAN	3	23.5233	22.936	23.5035	23.6641	23.5253
Q8IZ81	ELMD2_HUMAN	10	28.9064	29.1128	29.0406	29.1347	29.1645
Q92556	ELMO1_HUMAN	2	24.0565	24.2987	23.5324	23.8062	23.9807
Q96JJ3	ELMO2_HUMAN	8	26.3347	26.6488	26.3556	26.3122	26.5503
Q15370	ELOB_HUMAN	3	25.7304	25.5201	25.6803	25.7321	25.6124
Q15369	ELOC_HUMAN	3	25.9197	25.2186	25.3377	25.0869	25.3417
Q9BW60	ELOV1_HUMAN	1	24.5306	24.9125	24.9617	24.947	24.6443
Q9NYP7	ELOV5_HUMAN	3	27.9866	27.7358	27.8212	27.9211	27.7999
O95163	ELP1_HUMAN	6	24.5553	24.2482	24.4214	24.1691	24.196
Q8N766	EMC1_HUMAN	35	30.8393	30.7084	30.8143	30.8035	30.7002
Q5UCC4	EMC10_HUMAN	2	28.2148	27.6816	27.9844	27.7673	27.6127
Q15006	EMC2_HUMAN	10	29.0437	28.899	29.1109	29.1236	29.1362
Q9P0I2	EMC3_HUMAN	7	28.79	28.9668	28.8061	28.8871	28.9692
Q5J8M3	EMC4_HUMAN	3	25.1355	24.7954	25.0317	25.0227	24.9124
Q9BV81	EMC6_HUMAN	2	26.5809	26.1524	26.2124	26.4866	26.2797
Q9NPA0	EMC7_HUMAN	7	29.0405	29.151	29.1921	29.1687	29.2118
O43402	EMC8_HUMAN	6	27.707	28.0648	28.0115	28.0166	28.0294
Q9Y3B6	EMC9_HUMAN	4	25.324	24.9162	24.6389	24.5464	24.4302
P50402	EMD_HUMAN	6	28.2877	28.0802	28.1767	28.3167	28.2222
O94919	ENDD1_HUMAN	11	29.4479	29.8943	29.7178	29.757	29.7573
P06733	ENOA_HUMAN	19	31.192	31.4421	31.4378	31.395	31.4274
P13929	ENOB_HUMAN	4	29.0727	29.4746	28.9948	28.7727	29.0999
Q7L5Y1	ENOF1_HUMAN	5	24.6911	24.8406	24.6019	24.5676	24.581
P09104	ENOG_HUMAN	16	29.3906	29.3199	29.3158	29.1314	29.1928
Q9UHY7	ENOPH_HUMAN	3	24.4883	24.3593	24.1724	24.0668	24.2743
P14625	ENPL_HUMAN	59	34.3456	34.5935	34.6077	34.6916	34.6537
Q58FF3	ENPLL_HUMAN	6	28.2728	27.9176	28.1991	28.3887	28.1734
Q13822	ENPP2_HUMAN	20	29.2946	29.5252	29.2467	29.289	29.3641
Q9Y6X5	ENPP4_HUMAN	10	29.0589	29.1253	28.9714	29.0483	29.0914
Q9UJA9	ENPP5_HUMAN	3	23.2484	22.5848	22.6313	23.0453	23.022
O75355	ENTP3_HUMAN	3	25.2472	24.9164	25.2529	25.3877	25.1581
Q5NDL2	EOGT_HUMAN	4	24.0791	23.5716	23.6778	23.5167	23.8637
Q9UBC2	EP15R_HUMAN	7	25.4524	25.466	25.5049	25.4751	25.4999
P16452	EPB42_HUMAN	2	23.6313	23.4536	23.3809	23.652	23.4751
Q9UM22	EPDR1_HUMAN	3	24.6492	24.445	24.4814	24.6739	24.5343
P29317	EPHA2_HUMAN	4	24.175	24.5083	23.7972	24.0699	24.1972
P54753	EPHB3_HUMAN	4	21.6031	21.973	21.9558	21.8481	22.0523
P54760	EPHB4_HUMAN	2	19.2215	20.3057	19.6303	19.2136	20.082
Q8IUS5	EPHX4_HUMAN	4	24.1894	24.9672	24.6931	24.784	25.1052
P58107	EPIPL_HUMAN	3	26.0883	25.961	26.1038	26.1566	26.0608
Q9Y6I3	EPN1_HUMAN	8	25.9496	26.0379	25.7248	25.842	25.9584
Q14677	EPN4_HUMAN	14	27.9199	27.6852	27.8384	27.9232	27.8072
P42566	EPS15_HUMAN	6	23.8329	23.6724	24.1491	23.6736	24.1971
Q9C0D9	EPT1_HUMAN	3	29.3615	28.6582	28.4612	28.1043	28.1821
Q9NZ08	ERAP1_HUMAN	10	27.3211	27.3615	27.3161	27.2637	27.3824
Q2NKX8	ERC6L_HUMAN	1	24.156	25.2626	25.5707	25.6722	25.6022
P18074	ERCC2_HUMAN	2	22.6513	21.2088	21.7541	21.4165	20.91
P24390	ERD21_HUMAN	2	22.393	22.2802	22.4044	22.4671	22.4237
P62495	ERF1_HUMAN	1	22.9992	22.8159	22.768	22.7617	22.5618
P15170	ERF3A_HUMAN	2	22.1311	21.1797	21.5117	20.3952	20.8044
Q8IYD1	ERF3B_HUMAN	2	23.4288	23.2169	23.4507	23.0244	22.9525
Q14534	ERG1_HUMAN	9	27.3417	27.2924	27.0387	27.1168	27.163
O76062	ERG24_HUMAN	4	26.7047	26.6796	26.7708	26.9563	26.8473
Q9UKR5	ERG28_HUMAN	4	28.9331	28.8106	28.9049	29.0818	28.8804
P48449	ERG7_HUMAN	27	31.3163	31.4498	31.3482	31.3655	31.3721
Q969X5	ERGI1_HUMAN	9	28.2748	27.9869	28.2459	28.3085	28.3298
Q96RQ1	ERGI2_HUMAN	3	24.4017	24.1889	24.6778	24.288	24.203
Q9Y282	ERGI3_HUMAN	3	26.3839	26.7154	26.6175	26.1753	26.4112
P84090	ERH_HUMAN	3	23.4519	23.578	23.8136	23.714	23.6933
Q96DZ1	ERLEC_HUMAN	16	29.1563	29.3159	29.164	29.2202	29.3247
O75477	ERLN1_HUMAN	11	30.1723	30.3405	30.6408	30.826	30.5243
O94905	ERLN2_HUMAN	19	32.4031	32.5754	32.7625	32.8998	32.7949
Q8TAM6	ERMIN_HUMAN	17	29.9692	30.3184	30.4594	30.4091	30.3058
Q7Z2K6	ERMP1_HUMAN	19	29.6375	29.66	29.7498	29.8591	29.844
Q96HE7	ERO1A_HUMAN	22	31.8767	31.9215	31.8605	31.8979	31.9519
P30040	ERP29_HUMAN	18	32.2677	32.2094	32.204	32.3746	32.3472
Q9BS26	ERP44_HUMAN	17	31.4549	31.7372	31.4775	31.6222	31.6813
P23141	EST1_HUMAN	20	29.8061	29.9216	29.8225	29.8892	29.9802
P10768	ESTD_HUMAN	5	26.8462	27.0135	26.7391	26.6985	26.6846
Q9BSJ8	ESYT1_HUMAN	23	28.7203	28.6927	28.5491	28.5455	28.6673
A0FGR8	ESYT2_HUMAN	12	26.4206	26.23	26.2704	26.2268	26.245
P13804	ETFA_HUMAN	10	30.1663	30.3641	30.3268	30.3957	30.4226
P38117	ETFB_HUMAN	12	30.3975	30.4286	30.5244	30.7227	30.5835
Q16134	ETFD_HUMAN	22	29.812	29.9151	29.9507	29.9747	29.9682
O95571	ETHE1_HUMAN	2	21.5503	21.3165	21.1368	21.4709	21.171
Q01844	EWS_HUMAN	2	24.5417	24.5889	24.7662	24.7949	24.7719
Q9Y2D4	EXC6B_HUMAN	2	22.8462	22.0859	22.1238	22.109	22.1786
Q9NVH0	EXD2_HUMAN	7	26.1472	26.2357	25.8947	25.9514	26.0416
Q9NV70	EXOC1_HUMAN	3	22.7347	22.3359	22.4579	22.1489	22.3222
Q96KP1	EXOC2_HUMAN	3	23.384	22.9988	22.7396	22.7387	22.9752
Q96A65	EXOC4_HUMAN	9	26.0985	26.0378	25.5973	25.5182	25.5069
O00471	EXOC5_HUMAN	3	24.1742	23.8485	23.7054	23.1767	23.6627
Q9UPT5	EXOC7_HUMAN	3	24.9718	27.6006	26.672	26.3898	27.4089
Q9Y2C4	EXOG_HUMAN	5	26.7985	26.8442	26.5429	26.5164	26.6845
Q93063	EXT2_HUMAN	6	26.2741	25.781	26.9405	26.2386	26.4165
O43909	EXTL3_HUMAN	2	22.3803	22.5159	22.4762	22.7147	22.7863
P15311	EZRI_HUMAN	52	34.1361	34.0692	34.1517	34.3492	34.1795
O95990	F107A_HUMAN	3	23.4172	23.269	23.7118	23.8221	23.489
P50502	F10A1_HUMAN	8	29.1562	29.0722	28.9669	29.1586	29.1249
Q8NFI4	F10A5_HUMAN	3	26.5083	25.8791	25.9795	25.9612	25.7857
Q9NZB2	F120A_HUMAN	13	25.9671	25.6734	25.8361	25.9373	25.7884
Q9NX05	F120C_HUMAN	4	23.9866	23.8044	23.4099	23.6607	23.5687
Q8IXS8	F126B_HUMAN	4	24.0212	23.6915	23.7705	23.651	23.5561
Q3B820	F161A_HUMAN	2	22.2243	21.1515	21.2276	20.9732	20.9495
Q96A26	F162A_HUMAN	7	30.2241	30.2709	30.3106	30.4113	30.4326
Q8TBP5	F174A_HUMAN	2	23.211	22.5914	23.2218	23.542	23.3757
Q3ZCQ3	F174B_HUMAN	2	23.7718	23.5027	23.593	23.4088	23.5269
Q96ND0	F210A_HUMAN	2	24.7933	24.751	24.7494	24.9289	24.8557
Q5XKK7	F219B_HUMAN	2	22.0233	21.5295	21.9068	21.2648	21.6763
Q9H0X4	F234A_HUMAN	8	26.7802	26.4482	26.4288	26.5402	26.5552
A2RU67	F234B_HUMAN	2	21.81	21.249	22.1061	21.4063	21.9684
Q96D05	F241B_HUMAN	2	24.9464	25.1303	25.4592	25.5037	25.3956
P16118	F261_HUMAN	2	23.9049	24.3	23.8066	23.9509	24.0995
O60825	F262_HUMAN	20	28.9861	29.0162	28.9404	29.073	28.9761
Q16875	F263_HUMAN	4	25.7477	25.6815	25.4242	25.647	25.6386
Q16877	F264_HUMAN	2	25.6558	26.1768	26.2629	26.4996	26.3831
Q658Y4	F91A1_HUMAN	2	23.9126	23.8652	24.0022	23.6964	24.1173
Q9UBU6	FA8A1_HUMAN	7	27.6105	27.4667	27.6974	27.8359	27.6671
Q8NCA5	FA98A_HUMAN	2	23.8918	23.395	23.2983	23.1471	23.2078
Q52LJ0	FA98B_HUMAN	3	24.5367	24.5448	24.4365	24.6522	24.7954
O00519	FAAH1_HUMAN	22	30.4274	30.4876	30.3508	30.353	30.4803
O75844	FACE1_HUMAN	12	30.3757	30.6423	30.5897	30.7014	30.7169
Q9Y256	FACE2_HUMAN	2	22.9272	22.9179	22.5283	22.6311	22.5073
Q8NFF5	FAD1_HUMAN	1	21.412	21.669	21.66	19.9428	20.6547
O60427	FADS1_HUMAN	7	26.5249	26.223	26.0339	25.9074	26.1136
O95864	FADS2_HUMAN	7	28.4659	27.9435	28.2089	28.3816	28.1517
Q9Y5Q0	FADS3_HUMAN	4	26.8945	27.0443	27.2038	27.0332	26.96
Q96CS3	FAF2_HUMAN	14	29.7511	29.6498	29.5721	29.6178	29.6654
Q96GK7	FAH2A_HUMAN	9	28.6124	28.9423	28.8285	28.8809	28.931
Q6P2I3	FAH2B_HUMAN	6	28.1803	28.5113	28.3481	28.3682	28.4255
Q6P587	FAHD1_HUMAN	5	26.1761	26.3924	26.1274	25.8112	26.2978
Q05397	FAK1_HUMAN	2	20.3115	20.5539	20.4085	19.9739	20.3127
Q14289	FAK2_HUMAN	4	23.8857	23.915	23.2486	23.1415	23.5911
Q969Z0	FAKD4_HUMAN	4	23.4039	23.3035	23.4445	23.5151	23.5358
Q92520	FAM3C_HUMAN	3	26.2734	26.4233	26.2301	26.2551	26.3577
O94887	FARP2_HUMAN	9	25.8929	25.7374	25.517	25.54	25.5958
P49327	FAS_HUMAN	59	30.6979	30.7374	30.6611	30.746	30.7341
Q12805	FBLN3_HUMAN	10	28.0372	27.6787	27.8873	27.8965	27.8597
Q9UBX5	FBLN5_HUMAN	2	21.4152	20.5897	20.877	21.3502	21.4817
P22087	FBRL_HUMAN	3	25.1237	24.757	24.9398	25.0335	24.8792
Q9UK22	FBX2_HUMAN	3	24.1913	24.2759	24.1502	24.3739	24.3106
Q6ZVX7	FBX50_HUMAN	5	24.964	24.5925	24.8158	24.7972	24.8751
Q9Y3I1	FBX7_HUMAN	5	25.2596	25.6464	24.9194	24.8366	25.1804
Q9UKC9	FBXL2_HUMAN	3	24.4462	24.3399	23.8639	23.8361	23.9865
P55899	FCGRN_HUMAN	2	25.3225	25.0148	24.8544	24.4828	24.5931
Q13630	FCL_HUMAN	3	23.6861	24.2034	23.7339	23.3727	23.4588
Q8N0W3	FCSK_HUMAN	6	24.3448	24.34	23.5252	23.9403	23.88
P37268	FDFT_HUMAN	16	30.6402	31.0048	30.7295	30.7829	30.8083
Q96AC1	FERM2_HUMAN	2	22.0357	21.2527	20.6973	21.2559	20.9119
Q96M96	FGD4_HUMAN	3	23.5621	23.2473	23.2786	22.9227	22.8822
P09038	FGF2_HUMAN	2	23.6259	22.8164	22.972	23.3966	23.3076
P11362	FGFR1_HUMAN	2	23.7057	23.1231	23.2788	23.5153	23.4486
P21802	FGFR2_HUMAN	4	25.4229	24.5238	24.7683	24.8572	24.6241
P22455	FGFR4_HUMAN	2	23.5622	23.2334	23.3385	23.4959	23.6204
Q9NVK5	FGOP2_HUMAN	2	23.1157	22.6508	22.9363	23.1287	22.8874
P09769	FGR_HUMAN	1	20.0334	20.0059	20.0346	20.6767	20.1856
Q14192	FHL2_HUMAN	3	22.9297	22.6544	22.7104	22.6096	22.6065
Q03591	FHR1_HUMAN	5	25.21	25.106	25.2315	25.2112	25.1707
Q9BXR6	FHR5_HUMAN	3	24.0123	23.8894	24.1289	23.9487	23.6621
P02671	FIBA_HUMAN	5	23.2184	22.9129	22.9259	23.1035	22.8213
P02675	FIBB_HUMAN	2	24.0818	23.5899	23.6707	23.5978	23.6083
P02679	FIBG_HUMAN	3	24.166	24.1048	24.028	23.743	23.8509
O43427	FIBP_HUMAN	3	23.642	23.0907	23.1911	23.1801	23.2929
Q9BVA6	FICD_HUMAN	4	26.4163	25.9732	26.2537	26.4748	26.3517
Q92562	FIG4_HUMAN	3	23.6548	23.538	23.0527	23.1863	22.8825
Q6PIW4	FIGL1_HUMAN	2	25.297	25.429	25.3392	25.7144	25.7051
Q9Y3D6	FIS1_HUMAN	3	28.3458	28.6066	28.2363	28.1939	28.5457
Q8N6M3	FITM2_HUMAN	4	27.159	26.9945	27.2113	27.3018	27.0657
Q5T1M5	FKB15_HUMAN	5	25.0817	24.7398	24.9342	24.8225	24.884
P62942	FKB1A_HUMAN	2	24.2311	24.7413	24.2471	24.1078	24.6516
Q75LS8	FKB9L_HUMAN	2	24.8148	25.3605	25.7163	25.3903	25.6744
P26885	FKBP2_HUMAN	8	30.2951	30.6318	30.7397	30.8532	30.8027
Q00688	FKBP3_HUMAN	9	27.6733	27.7521	27.8136	27.9721	27.9637
Q02790	FKBP4_HUMAN	9	25.4409	25.1566	25.3316	25.4692	25.5051
Q14318	FKBP8_HUMAN	8	27.4488	27.4147	27.5419	27.5814	27.5564
O95302	FKBP9_HUMAN	6	26.5128	26.3072	26.576	26.4556	26.5497
Q13045	FLII_HUMAN	8	25.2674	25.2104	25.1021	25.4164	25.4343
P21333	FLNA_HUMAN	41	28.8726	28.6946	28.6993	28.759	28.7772
O75369	FLNB_HUMAN	57	29.7184	29.6868	29.5987	29.6444	29.6829
Q14315	FLNC_HUMAN	9	25.3398	25.1851	25.1032	25.21	25.1072
O75955	FLOT1_HUMAN	21	30.1718	30.336	30.3112	30.4103	30.3571
Q14254	FLOT2_HUMAN	16	30.2018	30.4399	30.3186	30.3431	30.3964
O43155	FLRT2_HUMAN	3	23.649	23.5272	23.3599	22.9859	23.434
Q9UPI3	FLVC2_HUMAN	3	22.4018	22.2185	22.3448	22.2459	21.8438
Q96HJ9	FMC1_HUMAN	2	24.895	24.3255	24.4454	24.569	24.5411
Q96PY5	FMNL2_HUMAN	2	20.6275	20.8076	20.2571	20.1406	20.5788
Q06787	FMR1_HUMAN	3	24.4195	24.2001	24.1407	24.4617	24.1854
Q96DP5	FMT_HUMAN	2	22.8706	22.2301	22.3493	22.5311	22.2091
Q9H479	FN3K_HUMAN	4	25.6172	25.8313	25.5883	25.5237	25.7372
Q9Y2H6	FND3A_HUMAN	9	26.5347	26.2512	26.2449	26.0424	26.0022
P15328	FOLR1_HUMAN	5	26.2695	26.4072	26.3756	26.4015	26.4926
P14324	FPPS_HUMAN	3	25.7603	25.301	25.4074	25.4988	25.4869
Q9P2B2	FPRP_HUMAN	8	25.6149	25.192	25.5112	25.3116	25.3024
Q16595	FRDA_HUMAN	2	23.0238	22.6656	22.2551	22.8465	22.4756
P02794	FRIH_HUMAN	6	24.6682	24.5602	24.6015	24.449	24.4495
P02792	FRIL_HUMAN	6	25.7466	25.4762	25.5486	25.6117	25.4986
Q7Z6J6	FRMD5_HUMAN	3	24.039	23.4048	23.2898	23.2829	23.4791
Q16658	FSCN1_HUMAN	5	23.5156	23.8265	23.9133	23.8931	23.9752
Q96AE4	FUBP1_HUMAN	5	24.7875	24.7089	24.6288	24.7506	24.8544
Q92945	FUBP2_HUMAN	6	24.8889	24.4583	24.9219	25.0575	24.8645
Q96I24	FUBP3_HUMAN	5	24.5311	24.1231	24.25	24.4302	24.2726
P04066	FUCO_HUMAN	3	24.4676	23.7434	23.6074	23.1496	23.1795
Q9BTY2	FUCO2_HUMAN	5	24.632	24.5637	24.501	24.3899	24.5959
P07954	FUMH_HUMAN	17	30.4527	30.5518	30.442	30.345	30.3983
Q9BWH2	FUND2_HUMAN	4	26.021	25.6062	25.9485	26.1611	26.0442
Q495W5	FUT11_HUMAN	2	22.6245	22.7056	22.7853	22.122	22.4834
Q9BYC5	FUT8_HUMAN	6	25.1106	24.8372	24.9984	24.911	25.0024
Q96IG2	FXL20_HUMAN	6	26.1628	25.881	25.8939	25.8485	25.84
P51114	FXR1_HUMAN	9	26.3355	26.3338	26.1752	26.3867	26.376
P51116	FXR2_HUMAN	9	26.8169	26.5111	26.4488	26.6381	26.596
Q96CU9	FXRD1_HUMAN	2	24.656	24.5298	24.4999	24.7401	24.7057
Q8IWF2	FXRD2_HUMAN	2	22.9683	23.5752	23.1653	23.3218	23.6441
Q9BQS8	FYCO1_HUMAN	9	25.0338	24.9082	24.7512	24.5665	24.5219
P06241	FYN_HUMAN	2	26.8751	26.7449	26.5619	26.9008	26.9045
Q9Y2I7	FYV1_HUMAN	3	23.13	22.8266	22.9815	23.1932	23.0101
Q9UP38	FZD1_HUMAN	2	25.2659	25.5382	24.9348	25.3217	25.2682
O60478	G137B_HUMAN	2	24.7201	24.7223	24.7459	24.9775	25.0355
Q13283	G3BP1_HUMAN	7	25.6145	25.3212	25.099	25.0686	25.0835
Q9UN86	G3BP2_HUMAN	2	21.6712	21.301	21.9285	21.871	21.6815
P04406	G3P_HUMAN	15	33.9149	34.1001	34.0465	34.0991	34.1012
Q8TAE8	G45IP_HUMAN	5	26.9655	26.8532	26.7312	26.7066	26.7394
P11413	G6PD_HUMAN	14	27.6854	27.8683	27.6591	27.6739	27.7842
O95479	G6PE_HUMAN	29	30.3525	30.3994	30.2371	30.3102	30.2724
P06744	G6PI_HUMAN	15	30.0508	30.0698	30.1091	30.1207	30.0948
O43826	G6PT1_HUMAN	3	25.031	24.5194	24.923	24.9618	24.8004
Q13480	GAB1_HUMAN	3	23.1923	23.0705	22.9831	22.9066	22.9022
P80404	GABT_HUMAN	16	27.6667	27.8597	27.695	27.5215	27.8905
O14976	GAK_HUMAN	9	25.7116	25.7195	25.5603	25.6698	25.6639
P0DPI2	GAL3A_HUMAN	6	28.2402	28.1878	27.9703	28.1254	28.1105
P54803	GALC_HUMAN	5	24.6722	24.4724	24.6732	24.3266	24.4489
Q8NB37	GALD1_HUMAN	2	24.0125	24.4481	24.264	24.5276	24.5438
Q14376	GALE_HUMAN	4	23.9127	23.972	23.8212	23.5106	23.7408
P51570	GALK1_HUMAN	2	22.0872	21.6672	21.5368	21.8997	21.9266
Q96C23	GALM_HUMAN	2	24.3876	24.563	25.0288	25.2681	24.9499
P34059	GALNS_HUMAN	3	25.2755	25.2656	25.385	25.4398	25.4423
Q10472	GALT1_HUMAN	10	27.1734	26.962	27.0139	27.2231	27.1553
Q10471	GALT2_HUMAN	11	26.8517	26.6212	26.688	26.399	26.6013
Q86SF2	GALT7_HUMAN	5	25.3157	25.3326	25.2505	25.4318	25.3635
Q14353	GAMT_HUMAN	3	23.6331	23.937	23.5482	23.1176	23.5772
Q14697	GANAB_HUMAN	38	33.0799	33.2238	33.2291	33.2929	33.2053
Q14C86	GAPD1_HUMAN	2	23.0927	22.8752	22.5603	22.8248	22.6827
Q9H4G4	GAPR1_HUMAN	5	27.0148	26.9634	27.0505	27.0494	26.9235
Q9NY12	GAR1_HUMAN	5	26.0329	26.2923	26.1151	25.9361	26.1749
P41250	GARS_HUMAN	8	25.3084	25.146	25.1069	24.8847	25.2515
Q9H0R6	GATA_HUMAN	5	24.2113	24.2018	24.0254	24.4202	24.3284
Q9HCG7	GBA2_HUMAN	9	25.7135	25.6617	25.4039	25.4081	25.4217
P62873	GBB1_HUMAN	12	32.1398	31.9038	31.8514	31.8267	31.8437
P62879	GBB2_HUMAN	12	31.6473	31.5407	31.5198	31.6336	31.5993
P16520	GBB3_HUMAN	10	29.285	29.1158	29.3146	29.4558	29.221
Q9HAV0	GBB4_HUMAN	4	26.9442	26.8761	27.3125	27.3594	27.2364
Q92538	GBF1_HUMAN	5	23.9818	23.8522	23.7071	23.7312	23.6892
P63211	GBG1_HUMAN	7	29.6737	29.657	29.7804	29.9825	29.8926
P50151	GBG10_HUMAN	1	24.1811	23.833	23.6561	23.8901	23.4923
P61952	GBG11_HUMAN	2	26.1684	25.5153	25.5979	25.8228	25.6309
Q9UBI6	GBG12_HUMAN	3	29.1681	29.639	29.022	29.0019	29.3549
Q9P2W3	GBG13_HUMAN	1	24.0146	24.2964	24.0601	23.1457	23.655
P59768	GBG2_HUMAN	2	26.0957	26.2271	26.0932	26.2313	26.3264
P63218	GBG5_HUMAN	2	25.1345	24.7712	24.5031	24.7253	24.4906
O60262	GBG7_HUMAN	4	27.0433	26.756	26.9826	27.1981	27.043
O14610	GBGT2_HUMAN	3	26.8152	26.6	26.7618	26.9554	26.8126
O95166	GBRAP_HUMAN	2	22.4461	21.9878	22.4055	22.423	22.107
P60520	GBRL2_HUMAN	2	24.2919	24.7272	24.5829	24.7763	24.9403
Q8IWJ2	GCC2_HUMAN	2	24.8417	24.5109	24.2282	24.0916	24.3933
Q92947	GCDH_HUMAN	8	28.0688	28.1594	28.0655	28.0788	28.1664
Q92616	GCN1_HUMAN	8	24.4368	24.2708	24.126	23.9955	24.0554
Q9BSJ2	GCP2_HUMAN	3	22.9237	22.6255	22.2639	21.8695	22.1772
Q9H3P7	GCP60_HUMAN	7	26.0178	26.2846	25.9902	26.0779	26.001
P23434	GCSH_HUMAN	2	28.3838	28.6977	28.5538	28.5107	28.1833
P23378	GCSP_HUMAN	27	29.5788	29.7969	29.5346	29.6003	29.6485
P48728	GCST_HUMAN	4	25.644	25.7608	25.5959	25.7183	25.7589
Q8TB36	GDAP1_HUMAN	5	26.7387	26.5885	26.5643	26.5672	26.6118
Q9NXN4	GDAP2_HUMAN	3	23.7897	24.0855	23.9765	24.3072	24.0448
P16260	GDC_HUMAN	3	24.6373	24.1385	24.2584	24.5694	24.4101
P35573	GDE_HUMAN	7	25.2067	25.0142	24.8508	24.7052	24.7146
Q9NZC3	GDE1_HUMAN	7	28.1675	28.2987	28.3137	28.4698	28.4115
P31150	GDIA_HUMAN	17	29.4131	29.499	29.3914	29.5202	29.504
P50395	GDIB_HUMAN	21	29.7051	29.682	29.675	29.797	29.7534
P52565	GDIR1_HUMAN	6	29.1056	29.1923	28.9722	28.9181	28.9022
P07093	GDN_HUMAN	2	22.5864	22.1426	22.8151	22.9483	22.533
Q8N9F7	GDPD1_HUMAN	6	26.7676	26.358	26.3972	26.3491	26.3678
Q8WTR4	GDPD5_HUMAN	2	25.1896	24.758	24.742	24.9671	24.9345
P52306	GDS1_HUMAN	2	23.0484	22.387	22.8826	22.9382	22.9114
P06396	GELS_HUMAN	26	31.7067	31.9627	31.9929	32.0378	31.9493
Q9NQX3	GEPH_HUMAN	2	22.9572	22.5852	22.3964	22.4128	22.2881
O00258	GET1_HUMAN	2	25.8205	26.0071	25.9252	25.9875	26.0761
O43681	GET3_HUMAN	8	29.4843	29.6153	29.4743	29.5556	29.5656
Q7L5D6	GET4_HUMAN	2	22.4013	22.9097	22.5906	22.6182	22.3368
P14136	GFAP_HUMAN	12	28.0985	27.8357	27.9281	27.9805	28.0142
Q06210	GFPT1_HUMAN	7	24.7739	24.2905	24.5592	24.7267	24.3568
Q8N9W4	GG6L2_HUMAN	4	22.9588	23.0973	22.5933	22.2753	20.8568
A8MZA4	GG6L6_HUMAN	4	24.6273	24.2206	24.5249	24.5993	24.3869
Q9UJY5	GGA1_HUMAN	2	25.276	25.63	25.5748	25.7374	25.5615
Q9UJY4	GGA2_HUMAN	5	25.6823	25.2269	25.3049	25.4848	25.3964
Q9NZ52	GGA3_HUMAN	2	25.1075	25.5038	25.481	25.6206	25.4002
Q92820	GGH_HUMAN	1	22.1438	22.3023	22.127	21.7425	22.3255
P19440	GGT1_HUMAN	4	27.1747	27.3664	27.2427	27.2261	27.3519
P36268	GGT2_HUMAN	2	26.2494	26.4735	26.594	26.7047	26.6739
A6NGU5	GGT3_HUMAN	3	26.7702	27.1035	26.9418	27.0331	27.1802
P36269	GGT5_HUMAN	2	21.5087	21.4228	21.275	20.8071	21.1827
Q9UJ14	GGT7_HUMAN	3	25.6297	25.1694	25.1703	25.5278	25.4157
Q6Y7W6	GGYF2_HUMAN	3	22.8197	22.4875	22.8214	22.449	22.5085
Q9H936	GHC1_HUMAN	4	26.8673	26.7946	26.8918	26.9174	26.9928
Q9H1K4	GHC2_HUMAN	2	26.0436	25.9865	26.068	26.2039	26.2298
Q8N2G8	GHDC_HUMAN	13	28.6982	28.4395	28.5628	28.6447	28.5907
Q9H3K2	GHITM_HUMAN	5	26.9153	26.3113	26.5427	26.711	26.6657
P13284	GILT_HUMAN	1	23.8367	23.1872	23.677	24.0684	23.8272
O14908	GIPC1_HUMAN	6	26.7591	26.5387	26.354	26.4202	26.4687
Q9Y2X7	GIT1_HUMAN	11	27.6671	27.3944	27.4833	27.589	27.4416
Q14161	GIT2_HUMAN	3	24.0119	23.7306	23.751	23.7708	23.7835
Q68CQ7	GL8D1_HUMAN	2	23.8722	24.3537	23.417	23.5041	23.7266
Q6UWU2	GLB1L_HUMAN	2	25.2497	25.7557	24.8783	24.9071	25.566
P04062	GLCM_HUMAN	8	26.6202	26.6077	26.5858	26.5231	26.6271
Q04446	GLGB_HUMAN	20	29.1033	29.0668	29.0298	28.9211	28.9861
P15104	GLNA_HUMAN	14	29.7991	29.7148	29.7037	29.8699	29.7749
Q16775	GLO2_HUMAN	5	25.6105	26.3539	25.6944	25.8206	26.2766
Q9HC38	GLOD4_HUMAN	6	27.1244	27.4168	27.0894	27.3445	27.5751
Q9H4A5	GLP3L_HUMAN	2	22.9206	22.1579	22.4757	22.6946	22.607
P32189	GLPK_HUMAN	2	22.3211	22.3422	22.1614	22.3484	22.2548
Q14409	GLPK3_HUMAN	2	23.1649	22.8271	23.0307	22.9409	23.2257
Q86SX6	GLRX5_HUMAN	2	25.4532	25.0316	24.991	25.0229	25.0495
O94925	GLSK_HUMAN	10	26.51	26.4501	26.4535	26.4471	26.5298
Q86SR1	GLT10_HUMAN	9	26.4284	26.0872	26.1519	26.1494	26.2804
Q8NCW6	GLT11_HUMAN	13	28.1566	28.1033	27.9914	28.0262	28.041
Q8IUC8	GLT13_HUMAN	2	24.8323	24.2779	24.6292	24.8031	24.3575
Q49A17	GLTL6_HUMAN	2	23.6798	23.358	23.2098	22.7375	23.4352
Q9NZD2	GLTP_HUMAN	2	25.2477	25.3546	25.3245	25.6905	25.4155
P14314	GLU2B_HUMAN	21	32.3129	32.1822	32.1671	32.1947	32.1538
Q7Z3D6	GLUCM_HUMAN	7	27.1287	27.1761	27.0231	27.2059	27.2097
P14672	GLUT4_HUMAN	2	23.3949	23.6371	23.2034	23.2876	23.3627
P34896	GLYC_HUMAN	9	27.2812	27.476	27.1346	26.9987	27.2039
P46976	GLYG_HUMAN	5	26.5861	26.2888	26.3855	26.324	26.3075
P34897	GLYM_HUMAN	7	26.6918	26.3694	26.3419	26.3562	26.3376
Q49A26	GLYR1_HUMAN	4	24.5159	24.4571	24.2885	24.2724	24.3543
P60983	GMFB_HUMAN	2	22.1823	21.9885	21.7853	21.1208	21.2991
Q96IJ6	GMPPA_HUMAN	2	22.1349	22.3474	21.9192	22.1698	22.199
Q9Y5P6	GMPPB_HUMAN	3	24.1664	24.243	24.2701	24.4601	24.5416
P36959	GMPR1_HUMAN	7	27.1202	26.5379	26.8085	26.8609	26.8034
Q9P2T1	GMPR2_HUMAN	3	25.0785	24.9123	25.0243	24.7907	25.0975
P29992	GNA11_HUMAN	12	28.5055	28.5767	28.6102	28.7556	28.6438
Q03113	GNA12_HUMAN	1	23.7889	22.6555	20.7928	21.1665	19.7462
Q14344	GNA13_HUMAN	13	28.0322	27.71	27.7185	27.6926	27.5129
O95837	GNA14_HUMAN	4	24.4448	23.8378	23.1501	23.2564	23.1699
P63096	GNAI1_HUMAN	5	28.2611	27.9993	28.2341	28.3021	28.2102
P04899	GNAI2_HUMAN	14	30.0017	30.0389	30.0941	30.0811	30.0764
P08754	GNAI3_HUMAN	4	27.9395	27.7256	28.0247	28.1539	28.09
P38405	GNAL_HUMAN	2	25.0279	25.9243	25.5062	25.7853	25.7965
P09471	GNAO_HUMAN	11	31.0515	31.3623	31.3189	31.435	31.3246
P50148	GNAQ_HUMAN	13	28.22	28.105	28.0106	28.1259	28.0958
Q5JWF2	GNAS1_HUMAN	10	28.5685	28.6604	28.608	28.7227	28.6593
P11488	GNAT1_HUMAN	12	29.747	30.2212	30.354	30.3459	30.3543
P19087	GNAT2_HUMAN	5	25.6794	25.9871	25.4952	25.2848	25.3795
A8MTJ3	GNAT3_HUMAN	3	28.3286	28.1781	28.4653	28.3173	28.3301
P19086	GNAZ_HUMAN	10	29.5812	29.7743	29.4689	29.5285	29.7113
O14775	GNB5_HUMAN	6	25.8759	25.6504	25.4419	25.7653	25.4592
O15228	GNPAT_HUMAN	14	26.1254	25.8301	25.7116	25.7023	25.7535
P46926	GNPI1_HUMAN	10	27.4376	27.4801	27.5178	27.5712	27.6696
Q8TDQ7	GNPI2_HUMAN	3	26.3058	26.3615	26.4734	26.5046	26.5471
Q9UJJ9	GNPTG_HUMAN	2	23.8991	23.5759	23.2552	23.424	23.364
P15586	GNS_HUMAN	6	28.7897	29.2468	28.9819	29.1036	29.088
Q08379	GOGA2_HUMAN	21	27.6803	27.7949	27.6273	27.618	27.6774
Q08378	GOGA3_HUMAN	3	22.8706	22.9497	22.2228	22.5201	22.3132
Q13439	GOGA4_HUMAN	17	26.5564	26.5606	26.292	26.4367	26.4389
Q8TBA6	GOGA5_HUMAN	16	26.8864	26.6339	26.6422	26.6385	26.6246
Q7Z5G4	GOGA7_HUMAN	2	23.3639	22.8366	23.1734	23.0321	23.054
Q14789	GOGB1_HUMAN	25	27.6592	27.4197	27.4259	27.416	27.3942
Q86XS8	GOLI_HUMAN	3	23.9665	23.4757	23.5975	23.6113	23.408
O00461	GOLI4_HUMAN	2	22.9373	22.4018	22.2583	22.791	22.6785
Q8NBJ4	GOLM1_HUMAN	7	26.8394	26.5468	26.7274	26.8011	26.7287
Q9H4A6	GOLP3_HUMAN	4	24.7587	24.7638	24.6197	24.7703	24.7114
Q5T7V8	GORAB_HUMAN	2	22.1864	22.6836	22.8996	22.1058	22.6754
Q9H8Y8	GORS2_HUMAN	3	24.2821	24.4381	24.7065	24.6017	24.4283
O95249	GOSR1_HUMAN	2	26.008	26.3361	26.2026	26.5661	26.5069
O14653	GOSR2_HUMAN	3	25.9721	26.3833	26.2198	25.5988	25.9049
Q9Y3E0	GOT1B_HUMAN	3	26.1043	27.0801	26.8633	26.5254	26.7346
Q5VW38	GP107_HUMAN	2	25.6542	25.2364	25.0883	25.2598	25.3179
Q9NPR9	GP108_HUMAN	2	20.4014	21.7827	22.5407	21.7749	22.2525
P51810	GP143_HUMAN	5	28.1993	28.2045	28.0781	28.0215	28.0364
Q86V85	GP180_HUMAN	2	23.8493	24.486	24.3034	24.4906	24.6807
O43292	GPAA1_HUMAN	5	26.7658	26.4172	26.5357	26.6478	26.591
Q9HCL2	GPAT1_HUMAN	8	27.3117	27.3281	27.094	27.1074	27.1213
Q86UL3	GPAT4_HUMAN	3	23.0705	24.0145	23.5905	23.7568	23.7249
Q9NQ84	GPC5C_HUMAN	7	27.9291	28.0633	28.1583	28.2858	28.2689
Q8N335	GPD1L_HUMAN	2	23.4493	22.9975	23.255	22.9503	23.0298
P21695	GPDA_HUMAN	3	24.6895	24.2827	23.9528	24.0498	24.3003
P43304	GPDM_HUMAN	19	28.2694	28.4193	28.148	28.2674	28.2859
B7ZAQ6	GPHRA_HUMAN	3	26.752	26.5355	26.5601	26.7471	26.5503
Q92643	GPI8_HUMAN	8	25.9649	26.244	26.103	25.9067	26.1594
P51674	GPM6A_HUMAN	7	30.636	30.6911	30.8654	31.0211	30.8402
Q14956	GPNMB_HUMAN	4	24.6163	24.8846	25.0169	25.072	24.9388
Q86YR5	GPSM1_HUMAN	7	26.3979	26.0575	25.9261	25.7373	25.8012
P07203	GPX1_HUMAN	10	30.3841	30.5158	30.5679	30.7642	30.677
P22352	GPX3_HUMAN	5	25.5447	25.3432	25.2159	25.2895	25.2856
P36969	GPX4_HUMAN	7	30.1368	30.2784	30.2484	30.4755	30.3397
Q6IC98	GRAM4_HUMAN	14	27.9122	28.0248	27.994	27.913	27.9322
P28676	GRAN_HUMAN	3	23.2529	22.9723	23.0332	22.8116	23.0011
Q4V328	GRAP1_HUMAN	16	27.0971	27.1512	26.9769	26.9027	26.9501
P62993	GRB2_HUMAN	3	22.3888	22.1057	22.1863	22.4688	22.3104
Q9UBQ7	GRHPR_HUMAN	8	27.7228	27.8619	27.6996	27.5802	27.8314
Q15835	GRK1_HUMAN	6	25.1843	25.0014	24.9288	24.838	24.9757
Q96HH9	GRM2B_HUMAN	5	26.0547	26.1604	26.0777	26.1476	26.0578
P28799	GRN_HUMAN	7	29.541	29.5074	29.2836	29.0551	29.1271
P38646	GRP75_HUMAN	30	32.8468	32.9965	32.9043	32.8619	32.9962
Q9HAV7	GRPE1_HUMAN	5	24.9341	24.4811	24.8615	24.8641	24.8794
Q12849	GRSF1_HUMAN	2	23.3385	24.0716	23.4993	23.2227	23.5383
Q5TC63	GRTP1_HUMAN	2	22.8122	22.7125	22.9882	22.1161	22.5399
O60443	GSDME_HUMAN	10	27.2009	27.1096	26.834	26.9655	26.9921
P48507	GSH0_HUMAN	4	25.466	25.1544	25.1226	25.1162	25.1622
P48506	GSH1_HUMAN	5	24.8716	24.6426	24.6726	24.8456	24.6617
P48637	GSHB_HUMAN	4	24.5712	24.2497	24.7569	24.9832	24.8855
P00390	GSHR_HUMAN	11	27.4662	27.4107	27.4522	27.4432	27.4638
P49840	GSK3A_HUMAN	3	23.5095	23.4733	23.4412	23.1897	23.1985
Q92896	GSLG1_HUMAN	27	28.9181	29.015	28.7998	28.7333	28.8696
Q7RTV2	GSTA5_HUMAN	2	25.2022	24.6196	24.5321	24.9325	24.6429
Q9Y2Q3	GSTK1_HUMAN	11	32.1607	32.2572	32.2562	32.4484	32.3722
P09488	GSTM1_HUMAN	6	27.3182	27.4967	27.5181	27.5128	27.4362
P28161	GSTM2_HUMAN	10	28.0897	28.141	28.1741	28.0971	28.1949
P21266	GSTM3_HUMAN	9	27.8362	28.041	28.0446	28.1896	28.1842
Q03013	GSTM4_HUMAN	7	27.1179	27.2454	27.2872	27.2854	27.2148
P46439	GSTM5_HUMAN	5	26.3645	26.5976	26.5115	26.5276	26.4912
P78417	GSTO1_HUMAN	11	27.9394	27.8587	27.867	28.135	28.0266
P09211	GSTP1_HUMAN	9	33.1195	33.4201	32.8967	32.929	33.1102
P30711	GSTT1_HUMAN	5	27.372	26.6846	26.6928	26.6702	26.6777
Q8NBJ5	GT251_HUMAN	13	26.7702	26.6857	26.6605	26.78	26.7925
Q86UP8	GTD2A_HUMAN	2	22.9326	22.1316	24.5118	24.2463	24.7117
Q6EKJ0	GTD2B_HUMAN	2	22.8148	22.1282	22.5919	22.5856	22.7856
P78347	GTF2I_HUMAN	12	26.8052	26.3583	26.552	26.4794	26.46
O00178	GTPB1_HUMAN	4	24.2298	24.098	23.8983	24.1209	24.1851
P11166	GTR1_HUMAN	8	34.0396	34.2104	34.0887	34.2809	34.1992
Q8TD20	GTR12_HUMAN	4	27.3607	27.4787	27.4114	27.5814	27.479
Q9NY64	GTR8_HUMAN	1	23.4615	23.4043	23.8321	23.7994	23.8982
Q02846	GUC2D_HUMAN	14	26.5052	27.1434	26.8823	27.0858	26.8266
P51841	GUC2F_HUMAN	3	24.3033	26.0929	25.6915	26.0786	25.4018
Q8N442	GUF1_HUMAN	5	22.9969	22.9643	23.0194	22.8087	23.1391
Q9UBP9	GULP1_HUMAN	12	28.6407	28.3586	28.5703	28.5944	28.5306
Q4G148	GXLT1_HUMAN	4	24.932	24.4016	24.3365	24.6633	24.5832
P13807	GYS1_HUMAN	16	27.7977	27.9172	27.8031	27.8216	27.8628
P07305	H10_HUMAN	2	27.5408	27.2038	27.3533	27.3742	27.3562
Q02539	H11_HUMAN	3	28.4156	28.0093	28.4838	28.5601	28.4119
P16403	H12_HUMAN	7	31.625	32.0253	32.231	32.3635	32.2158
P16402	H13_HUMAN	6	31.4637	31.8211	31.9938	32.1416	31.9891
P10412	H14_HUMAN	7	31.481	31.8349	32.0113	32.1579	32.006
Q53T59	H1BP3_HUMAN	3	22.8569	23.4643	23.127	22.3979	22.4943
Q92522	H1X_HUMAN	3	27.5099	27.3477	27.3303	27.3487	27.2678
Q96QV6	H2A1A_HUMAN	2	30.7803	30.6002	30.8837	31.0558	30.8926
Q93077	H2A1C_HUMAN	3	31.8283	31.6945	31.799	31.6858	31.6746
Q99878	H2A1J_HUMAN	3	31.8283	31.6945	31.799	31.6858	31.6746
Q8IUE6	H2A2B_HUMAN	2	24.2569	24.0372	24.2756	24.0939	24.3468
Q71UI9	H2AV_HUMAN	3	29.3568	29.5033	29.9175	30.0509	29.871
O75367	H2AY_HUMAN	6	26.3685	25.6818	25.8591	25.9467	25.8261
Q96A08	H2B1A_HUMAN	2	31.0746	31.1054	31.2807	31.4865	31.2911
Q93079	H2B1H_HUMAN	4	30.2753	30.3272	30.3496	29.9638	30.3148
Q6DRA6	H2B2D_HUMAN	2	26.5078	25.9906	26.0413	26.2347	26.335
Q16778	H2B2E_HUMAN	3	30.0065	30.0705	30.0535	29.5201	30.0286
Q71DI3	H32_HUMAN	2	28.3938	27.9717	28.4723	28.565	28.4026
P84243	H33_HUMAN	2	28.3938	27.9717	28.4723	28.565	28.4026
P62805	H4_HUMAN	7	31.915	32.2081	32.1354	32.3141	32.221
Q58FF8	H90B2_HUMAN	6	28.0561	27.7724	28.1024	28.2002	28.1314
Q58FF7	H90B3_HUMAN	12	29.3346	29.1683	29.4206	29.4918	29.4565
Q58FF6	H90B4_HUMAN	6	27.5266	27.6195	27.849	27.8923	27.9224
Q6Y1H2	HACD2_HUMAN	2	25.0153	24.6288	24.9023	25.0702	25.0871
Q9P035	HACD3_HUMAN	13	32.7727	32.956	32.9596	33.1213	33.0409
Q9UJ83	HACL1_HUMAN	9	28.6125	28.6884	28.3394	28.476	28.4977
A1L0T0	HACL2_HUMAN	25	32.9619	33.1242	32.9256	32.9472	33.0337
Q13442	HAP28_HUMAN	3	25.7686	25.0194	24.7517	24.9565	24.9084
P12081	HARS1_HUMAN	6	24.8582	24.4032	24.351	24.4629	24.4173
O00165	HAX1_HUMAN	1	22.613	22.2869	21.9055	22.4539	22.1471
P69905	HBA_HUMAN	9	33.2002	33.1233	33.232	33.2476	33.1823
P02008	HBAZ_HUMAN	1	28.5354	28.1067	28.4367	28.5653	28.3842
P68871	HBB_HUMAN	12	34.3921	34.4098	34.2402	34.3283	34.3571
P02042	HBD_HUMAN	11	32.2652	32.6912	32.2953	32.5747	32.48
P69891	HBG1_HUMAN	2	31.402	32.0456	31.3655	31.8013	31.6539
Q9Y450	HBS1L_HUMAN	1	23.1141	22.4826	22.4914	22.8085	22.8963
Q99714	HCD2_HUMAN	15	29.3267	29.6613	29.4931	29.4822	29.6651
Q16836	HCDH_HUMAN	9	29.7984	29.7846	29.474	29.4039	29.4892
P51610	HCFC1_HUMAN	3	23.2407	22.8425	22.9982	22.9874	22.549
P08631	HCK_HUMAN	3	26.41	26.0126	25.4988	25.9283	25.949
P42858	HD_HUMAN	3	22.1426	21.7024	21.6102	21.8057	22.0635
Q92769	HDAC2_HUMAN	2	21.0879	21.1956	21.036	20.6159	21.2028
P51858	HDGF_HUMAN	5	24.8018	26.0241	25.8595	25.8309	25.9504
Q7Z4V5	HDGR2_HUMAN	2	22.2301	21.9724	21.6239	21.887	21.4213
Q9H0R4	HDHD2_HUMAN	3	25.4444	26.073	25.7739	25.8172	26.1177
Q9BSH5	HDHD3_HUMAN	4	23.9696	23.5844	23.3626	22.7019	22.7398
Q9BXW7	HDHD5_HUMAN	6	25.8127	25.7611	26.0184	25.9524	26.0234
Q9NRV9	HEBP1_HUMAN	2	22.837	23.1799	22.8601	22.4556	22.567
Q9Y5Z4	HEBP2_HUMAN	5	25.5751	25.8873	25.4457	25.3667	25.5975
Q14CZ8	HECAM_HUMAN	2	26.3744	26.104	26.0267	26.1935	25.6243
Q9ULT8	HECD1_HUMAN	2	20.535	20.9842	20.5334	19.8342	20.2234
Q5T447	HECD3_HUMAN	2	21.6199	21.8829	21.5828	21.2045	21.2562
Q9Y4D8	HECD4_HUMAN	2	21.4153	21.0817	20.7382	20.9097	21.4576
Q9ULI3	HEG1_HUMAN	4	25.8707	25.3553	25.2873	25.3496	25.1902
P13716	HEM2_HUMAN	5	26.8068	26.6408	26.5518	26.5676	26.6191
P22830	HEMH_HUMAN	12	29.128	28.9408	29.0112	29.1541	29.1296
P02790	HEMO_HUMAN	8	27.7167	27.9025	27.7987	27.5881	27.6508
O95714	HERC2_HUMAN	3	22.7807	22.2964	21.8176	22.5636	22.5104
P06865	HEXA_HUMAN	9	28.2946	28.6067	28.1373	28.3051	28.4434
P07686	HEXB_HUMAN	11	28.6174	28.6991	28.6503	28.7239	28.8201
Q30201	HFE_HUMAN	4	25.6346	26.005	25.7483	25.5468	25.918
P04233	HG2A_HUMAN	2	25.8555	24.9184	24.9321	25.0277	24.6559
B2RPK0	HGB1A_HUMAN	2	26.0862	25.7033	26.0414	26.1057	25.9815
Q93099	HGD_HUMAN	8	25.8197	26.0561	25.726	25.636	25.9762
O14964	HGS_HUMAN	7	25.136	24.7824	25.0311	25.0352	25.1174
Q9HCP6	HHATL_HUMAN	7	26.1333	25.8856	26.1509	26.266	26.0678
Q6NVY1	HIBCH_HUMAN	14	28.9849	28.9046	28.9163	28.9658	28.941
Q8IV36	HID1_HUMAN	2	23.9395	24.0016	23.6526	23.6835	23.7377
Q9Y241	HIG1A_HUMAN	1	27.6809	26.8818	27.1418	27.2643	27.1766
Q9BW72	HIG2A_HUMAN	2	25.1732	24.9371	24.9861	24.2723	25.2773
P49773	HINT1_HUMAN	5	26.2087	26.0838	26.1063	25.9485	26.0469
Q9BX68	HINT2_HUMAN	2	26.1492	26.8866	26.2819	26.3046	26.4019
Q9NQE9	HINT3_HUMAN	7	26.4165	26.6959	26.639	26.4871	26.5653
O00291	HIP1_HUMAN	2	25.073	25.0954	25.4922	25.9851	26.0261
Q2TB90	HKDC1_HUMAN	5	25.8977	25.4286	25.6346	25.7826	25.7672
P04439	HLAA_HUMAN	13	29.7091	29.7169	29.7058	29.7272	29.6865
P01889	HLAB_HUMAN	6	28.7724	28.7564	28.7839	28.8434	28.7934
P10321	HLAC_HUMAN	8	29.082	29.322	29.3446	29.4177	29.2797
P13747	HLAE_HUMAN	2	27.7413	27.5537	27.7191	27.6958	27.6112
P30511	HLAF_HUMAN	2	24.3776	24.1124	24.5066	24.5254	24.2912
P01893	HLAH_HUMAN	8	29.0813	29.1394	29.2188	29.2248	29.1119
Q8TCT9	HM13_HUMAN	7	29.1848	29.4818	29.4639	29.5561	29.6155
Q01581	HMCS1_HUMAN	2	23.7749	23.7628	24.0094	24.0801	24.0819
P54868	HMCS2_HUMAN	25	32.2492	32.3369	32.3452	32.4343	32.37
P04035	HMDH_HUMAN	1	19.2467	19.2677	20.515	20.01	20.5612
P09429	HMGB1_HUMAN	6	26.9288	26.7609	27.0792	27.1328	27.0034
P26583	HMGB2_HUMAN	3	22.9404	22.7531	23.0183	22.9179	22.9541
P35914	HMGCL_HUMAN	12	28.8196	28.9514	28.8676	28.8908	29.0029
P05114	HMGN1_HUMAN	2	11.3028	21.3128	18.8174	20.6256	20.0048
P05204	HMGN2_HUMAN	5	25.9271	25.026	24.483	24.8002	24.3567
Q15651	HMGN3_HUMAN	2	24.1161	23.668	24.0115	24.2659	23.8819
P09601	HMOX1_HUMAN	8	28.1642	27.8305	27.742	27.881	27.8481
P30519	HMOX2_HUMAN	12	29.3369	29.4184	29.333	29.4551	29.4797
P50135	HNMT_HUMAN	2	23.5106	22.9644	23.0554	23.2159	23.2994
O60812	HNRC1_HUMAN	4	27.7676	27.9314	27.7589	27.9899	28.0837
O14979	HNRDL_HUMAN	2	25.6816	25.9639	25.5302	26.1722	26.1797
P31943	HNRH1_HUMAN	4	26.332	26.0595	26.1031	25.9059	25.8386
P55795	HNRH2_HUMAN	7	27.5458	27.5967	27.6181	27.4836	27.3165
P31942	HNRH3_HUMAN	3	24.6749	24.3724	24.3373	24.3891	24.2742
Q9BUJ2	HNRL1_HUMAN	2	23.632	23.2722	23.6446	23.3311	23.6687
Q1KMD3	HNRL2_HUMAN	10	26.4161	25.9901	25.9994	26.1301	26.0881
Q8WVV9	HNRLL_HUMAN	2	23.3813	22.4204	22.4827	22.2202	22.6726
P07910	HNRPC_HUMAN	7	28.5185	28.8318	28.5673	28.692	28.8735
Q14103	HNRPD_HUMAN	11	28.3664	28.2362	28.1778	28.3654	28.3261
P52597	HNRPF_HUMAN	7	26.4648	26.3253	26.2773	26.1351	26.2294
P61978	HNRPK_HUMAN	13	29.47	29.4105	29.4932	29.4376	29.5104
P14866	HNRPL_HUMAN	11	27.9948	28.0598	28.0566	28.1734	28.1881
P52272	HNRPM_HUMAN	13	27.8958	27.89	27.7417	27.8598	27.849
O60506	HNRPQ_HUMAN	12	27.5955	27.592	27.5367	27.6374	27.6208
O43390	HNRPR_HUMAN	14	27.9147	27.8698	27.7425	27.7541	27.6846
Q00839	HNRPU_HUMAN	12	28.2667	27.9969	28.2071	28.3096	28.2297
Q86YM7	HOME1_HUMAN	3	23.946	23.6816	23.9302	23.7644	23.9617
Q9NSB8	HOME2_HUMAN	2	22.9531	22.744	22.976	23.0271	22.7016
Q9NSC5	HOME3_HUMAN	9	26.6819	26.7042	26.8059	26.7851	26.6453
Q9UJC3	HOOK1_HUMAN	4	24.5207	24.1866	23.9939	23.7741	24.0351
Q86VS8	HOOK3_HUMAN	2	23.059	22.1684	22.4113	21.8494	22.2875
Q8IWW8	HOT_HUMAN	8	26.3682	26.3556	26.0981	26.0974	26.1991
Q5SSJ5	HP1B3_HUMAN	16	29.4809	29.6121	29.491	29.686	29.6609
Q9NZL4	HPBP1_HUMAN	2	21.6377	20.7583	21.1154	21.6925	21.238
P84074	HPCA_HUMAN	2	27.2653	27.0077	26.823	27.0347	26.9027
P37235	HPCL1_HUMAN	9	28.0173	27.804	27.5793	27.7235	27.7142
P00492	HPRT_HUMAN	5	25.8133	25.4171	25.6173	25.7666	25.813
P00738	HPT_HUMAN	5	26.4747	26.6334	26.5295	26.7774	26.7811
P00739	HPTR_HUMAN	2	24.5361	24.728	24.5205	24.7088	25.0052
Q92598	HS105_HUMAN	3	25.1304	25.5694	25.1745	25.2813	25.2436
Q7LGA3	HS2ST_HUMAN	3	24.7334	24.2841	24.6047	24.6484	24.4634
P0DMV9	HS71B_HUMAN	26	30.491	30.6382	30.4944	30.5966	30.6389
P34931	HS71L_HUMAN	9	31.0293	31.4369	31.6055	31.7359	31.6669
O95757	HS74L_HUMAN	6	25.924	26.0291	25.8058	25.7299	25.8079
Q14568	HS902_HUMAN	5	27.8897	27.539	27.7831	27.763	27.7128
Q58FG1	HS904_HUMAN	2	25.0602	25.163	25.3109	24.9112	25.3391
Q58FG0	HS905_HUMAN	7	29.023	29.0236	28.8581	28.8026	28.8537
P07900	HS90A_HUMAN	30	30.8641	30.9393	30.9828	31.0306	30.9552
P08238	HS90B_HUMAN	25	30.5813	30.4129	30.5856	30.6337	30.5561
O75506	HSBP1_HUMAN	2	22.4977	22.4155	22.4479	21.7802	22.1828
Q3SXM5	HSDL1_HUMAN	4	25.1269	24.9543	25.5706	25.4512	25.4017
Q6YN16	HSDL2_HUMAN	24	30.5669	30.5292	30.4832	30.406	30.4089
P48723	HSP13_HUMAN	10	28.1892	28.5212	28.4562	28.5625	28.6367
P54652	HSP72_HUMAN	7	31.8773	32.2046	32.3061	32.4862	32.3977
P34932	HSP74_HUMAN	19	29.374	29.2654	29.2864	29.4082	29.3335
P17066	HSP76_HUMAN	8	30.7373	30.3409	30.5088	30.6478	30.6153
P48741	HSP77_HUMAN	4	26.5706	26.5115	26.3736	26.5054	26.4887
P11142	HSP7C_HUMAN	29	33.3277	33.4587	33.5407	33.6874	33.6102
P04792	HSPB1_HUMAN	19	32.0078	32.2935	32.2931	32.4427	32.4783
Q9UJY1	HSPB8_HUMAN	3	26.6826	26.8402	26.7576	27.0091	27.0364
Q86XA9	HTR5A_HUMAN	2	22.8963	23.1799	22.7239	22.3031	22.5869
Q9P2D3	HTR5B_HUMAN	2	21.5073	21.4489	21.1793	21.2841	21.6185
Q92743	HTRA1_HUMAN	4	25.9832	26.1287	26.441	26.6894	26.4076
Q7Z6Z7	HUWE1_HUMAN	22	27.2639	27.0187	27.0283	27.1447	27.1186
Q96D96	HVCN1_HUMAN	4	26.3069	26.334	26.638	26.6719	26.4976
P19367	HXK1_HUMAN	36	30.5606	30.6706	30.632	30.6744	30.7083
P52789	HXK2_HUMAN	4	27.76	28.1756	28.0568	28.2114	28.3197
P52790	HXK3_HUMAN	2	26.9035	27.5849	27.272	27.4476	27.6477
Q9BYI3	HYCCI_HUMAN	9	27.6037	27.5879	27.2748	27.3101	27.3212
P07099	HYEP_HUMAN	34	34.0583	33.9542	33.9797	34.0637	33.968
P34913	HYES_HUMAN	21	29.4443	29.5359	29.3909	29.4048	29.4597
Q9Y4L1	HYOU1_HUMAN	33	31.5667	31.7397	31.6513	31.6375	31.6635
Q9H1B7	I2BPL_HUMAN	2	21.7519	21.7135	21.9754	21.9622	21.7788
Q14642	I5P1_HUMAN	2	24.0709	23.6017	23.551	23.8698	23.424
Q2TAA2	IAH1_HUMAN	2	22.5229	22.6601	22.6764	21.7973	22.6074
Q16270	IBP7_HUMAN	7	27.8581	27.9686	28.0584	28.1593	28.0634
P05155	IC1_HUMAN	5	26.0979	25.557	25.6002	25.7506	25.6295
P20810	ICAL_HUMAN	6	26.334	25.5818	25.7023	25.5451	25.4735
P05362	ICAM1_HUMAN	14	31.0084	31.1137	31.1168	31.1805	31.1891
P14735	IDE_HUMAN	5	25.8982	25.8775	25.6878	25.6327	25.7132
P50213	IDH3A_HUMAN	9	29.0503	28.8936	28.9658	29.036	28.9816
O43837	IDH3B_HUMAN	10	26.4219	26.3971	26.3061	26.3283	26.3244
P51553	IDH3G_HUMAN	11	27.8854	28.139	28.1907	28.1904	28.2398
O75874	IDHC_HUMAN	9	28.6934	28.8103	28.6991	28.6325	28.6948
P48735	IDHP_HUMAN	25	31.6924	31.8163	31.6494	31.7365	31.7726
Q13907	IDI1_HUMAN	7	29.0148	28.8191	28.6661	28.5745	28.8163
Q9HBG6	IF122_HUMAN	2	22.4042	22.333	22.4113	22.244	22.3095
Q96RY7	IF140_HUMAN	2	23.8629	23.801	23.7701	23.8558	23.7501
O14602	IF1AY_HUMAN	2	22.8585	22.6039	22.0785	22.3836	22.6631
P05198	IF2A_HUMAN	7	25.8726	25.5906	25.6186	25.483	25.4973
P20042	IF2B_HUMAN	6	26.0747	26.2263	25.936	25.6482	25.5769
P41091	IF2G_HUMAN	7	26.0025	25.7336	25.7718	25.8397	25.9415
Q2VIR3	IF2GL_HUMAN	5	24.9595	25.0385	24.9838	24.8016	25.0036
P46199	IF2M_HUMAN	3	24.0555	24.2868	24.1935	24.1748	24.5378
O60841	IF2P_HUMAN	3	25.2661	24.8448	24.9319	25.0925	25.0347
Q9H2K0	IF3M_HUMAN	2	23.59	23.3565	22.8338	22.5912	22.7234
P60842	IF4A1_HUMAN	19	28.9778	29.0603	28.9764	29.0677	29.034
Q14240	IF4A2_HUMAN	14	28.3013	28.2543	28.0204	28.1242	28.1034
P38919	IF4A3_HUMAN	3	24.8236	24.848	24.8664	25.078	24.7578
P06730	IF4E_HUMAN	2	26.3652	25.9324	25.9646	26.0943	25.8798
Q04637	IF4G1_HUMAN	13	26.4254	26.3964	26.3341	26.4106	26.4889
P78344	IF4G2_HUMAN	10	25.2808	25.3287	25.0865	25.1678	25.2948
O43432	IF4G3_HUMAN	2	22.9748	22.4217	22.7711	22.9494	22.8736
Q15056	IF4H_HUMAN	3	27.6195	27.5634	27.2168	27.2513	27.3216
P55010	IF5_HUMAN	2	23.4639	23.1916	23.2521	23.0308	23.4296
Q9GZV4	IF5A2_HUMAN	3	26.9431	27.3602	27.4468	27.7749	27.6696
Q6IS14	IF5AL_HUMAN	7	26.7864	26.867	27.0222	27.0785	27.0269
P56537	IF6_HUMAN	5	24.0517	23.5348	23.6063	24.0475	23.9629
A6NMD0	IFM10_HUMAN	2	24.9657	24.9003	24.6093	24.6512	24.5457
Q9BW83	IFT27_HUMAN	2	24.0407	23.4635	23.5447	23.7956	23.6423
P08069	IGF1R_HUMAN	16	27.3429	27.1467	27.0578	27.1129	27.1459
P01876	IGHA1_HUMAN	7	27.0528	26.7618	26.777	26.9501	26.8352
P01857	IGHG1_HUMAN	6	29.2484	29.7182	29.5915	29.6422	29.6978
P01859	IGHG2_HUMAN	4	26.6073	26.4068	26.3647	26.2815	26.4052
P01860	IGHG3_HUMAN	7	26.9494	28.1977	28.293	28.3948	28.1604
P01861	IGHG4_HUMAN	5	26.9773	28.1483	28.2314	28.2278	28.0386
P01834	IGKC_HUMAN	5	28.5302	28.6935	28.4218	28.287	28.5541
P0DOY2	IGLC2_HUMAN	2	27.6736	27.7978	27.85	27.9257	28.0347
A0M8Q6	IGLC7_HUMAN	2	27.6736	27.7978	27.85	27.9257	28.0347
B9A064	IGLL5_HUMAN	2	24.6111	24.0643	24.2713	24.3353	24.4307
P0DOX6	IGM_HUMAN	2	22.9236	22.214	22.6629	22.4717	22.2788
P40189	IL6RB_HUMAN	7	24.9624	24.4785	24.3592	23.9836	24.088
Q12905	ILF2_HUMAN	9	27.9626	28.0543	28.0391	28.0833	28.1522
Q12906	ILF3_HUMAN	19	27.9689	28.1857	28.2199	28.3781	28.3145
Q13418	ILK_HUMAN	5	25.1125	25.2726	24.9503	25.0293	25.0194
O00629	IMA3_HUMAN	2	21.5711	21.6784	21.1516	20.6734	21.4345
P52294	IMA5_HUMAN	3	23.6488	23.4799	23.3517	23.2829	23.4998
O60684	IMA7_HUMAN	3	23.6488	23.4799	23.3517	23.2829	23.4998
Q14974	IMB1_HUMAN	14	27.9177	28.2051	27.8893	27.7998	27.8864
P29218	IMPA1_HUMAN	6	25.9503	25.6	25.6526	25.6548	25.7786
Q9NX62	IMPA3_HUMAN	5	24.7982	24.6721	24.6497	24.6304	24.7734
Q17R60	IMPG1_HUMAN	11	26.8717	26.597	26.3727	26.5198	26.351
Q9BZV3	IMPG2_HUMAN	7	27.1541	27.3752	27.1924	27.3251	27.3818
Q8NI35	INADL_HUMAN	2	21.9329	21.088	21.2514	21.1875	21.1805
Q27J81	INF2_HUMAN	5	23.4927	24.3429	23.8792	23.1065	23.7643
Q9NPH2	INO1_HUMAN	3	23.3456	23.4092	23.289	22.7607	23.1618
Q9BT40	INP5K_HUMAN	23	34.0167	34.3204	34.3203	34.4297	34.3694
P06213	INSR_HUMAN	23	28.5083	28.5292	28.6196	28.7756	28.6447
P14616	INSRR_HUMAN	2	24.4914	23.7307	23.6237	24.3758	24.1887
Q8TEX9	IPO4_HUMAN	2	21.4873	20.9841	20.6489	20.6401	21.0355
O00410	IPO5_HUMAN	10	25.4265	25.271	25.2617	25.284	25.2978
O95373	IPO7_HUMAN	4	22.812	22.3682	22.6446	22.3957	22.4894
Q96P70	IPO9_HUMAN	3	23.6168	23.8795	23.6939	23.7285	23.7333
Q8IWB1	IPRI_HUMAN	8	26.0294	25.8266	25.9642	26.1013	26.0396
Q15181	IPYR_HUMAN	13	28.9139	29.141	29.0634	29.0641	29.124
Q9H2U2	IPYR2_HUMAN	13	29.7202	29.8847	29.8765	30.0226	29.9669
P46940	IQGA1_HUMAN	48	30.086	30.0787	29.9372	29.957	30.0171
Q13576	IQGA2_HUMAN	57	30.8071	30.835	30.7474	30.8029	30.7827
Q86VI3	IQGA3_HUMAN	2	26.6386	26.909	27.0317	27.3134	27.1108
Q9Y5U9	IR3IP_HUMAN	2	26.8084	27.1612	26.9291	27.2042	27.144
Q86U28	ISCA2_HUMAN	2	23.6785	23.1241	23.381	23.3503	23.4706
Q9H1K1	ISCU_HUMAN	3	25.1936	25.1862	25.4132	25.297	25.3687
Q96CN7	ISOC1_HUMAN	2	25.5904	25.7111	25.606	25.6914	25.7669
Q96AB3	ISOC2_HUMAN	2	26.4754	26.317	26.2908	26.4995	26.6474
P53990	IST1_HUMAN	4	25.2364	24.9026	25.3928	25.4819	25.4412
P26006	ITA3_HUMAN	5	25.7564	25.5568	25.6423	25.6191	25.5938
P23229	ITA6_HUMAN	35	30.6362	30.8335	30.7531	30.7438	30.8019
Q13683	ITA7_HUMAN	4	24.4863	25.6946	25.2638	24.6846	25.2707
P06756	ITAV_HUMAN	53	34.4727	34.5194	34.3777	34.3873	34.4108
P05556	ITB1_HUMAN	16	28.736	28.7635	28.7623	28.8156	28.7728
P16144	ITB4_HUMAN	27	28.9649	29.0472	29.0039	28.9777	28.978
P18084	ITB5_HUMAN	13	28.0495	27.8424	27.6174	27.5471	27.6677
P26012	ITB8_HUMAN	26	32.6155	32.6353	32.8382	32.8561	32.8142
Q96J02	ITCH_HUMAN	3	23.8854	24.013	23.8456	23.7492	23.8623
Q9Y287	ITM2B_HUMAN	6	25.5433	25.3586	25.5453	25.1816	25.5019
Q9NQX7	ITM2C_HUMAN	4	26.9968	26.8194	27.0262	27.1893	27.1224
P28290	ITPI2_HUMAN	3	23.7588	23.4781	23.8701	23.6048	23.8602
Q13572	ITPK1_HUMAN	2	23.8162	23.5813	23.4566	23.4605	23.5751
Q14643	ITPR1_HUMAN	78	31.174	31.2455	31.2003	31.2637	31.283
Q14571	ITPR2_HUMAN	25	27.5816	27.4439	27.3447	27.3752	27.4886
Q14573	ITPR3_HUMAN	5	27.6054	27.6594	27.4671	27.6747	27.6428
Q15811	ITSN1_HUMAN	2	23.7591	23.4518	23.323	23.6843	23.2959
P26440	IVD_HUMAN	13	28.2272	28.3117	28.3522	28.3674	28.388
P78504	JAG1_HUMAN	2	18.9488	21.8198	21.8879	21.9785	21.8925
Q8N5M9	JAGN1_HUMAN	3	26.977	26.7117	26.825	27.0022	26.8764
Q9Y624	JAM1_HUMAN	3	25.675	25.5382	25.0406	25.5052	25.4411
Q9BX67	JAM3_HUMAN	3	25.213	24.9195	25.3536	25.1161	24.9164
O60271	JIP4_HUMAN	6	23.8034	23.5548	23.7661	23.7857	23.5878
Q14667	K0100_HUMAN	6	24.1477	23.8024	24.0796	23.8054	23.9332
Q2LD37	K1109_HUMAN	33	27.425	27.1744	27.0775	27.0401	27.1388
Q86T90	K1328_HUMAN	2	21.8845	21.6797	21.7237	21.6876	21.6662
Q9P206	K1522_HUMAN	3	23.5689	22.7035	22.9898	22.5999	22.3293
P13645	K1C10_HUMAN	15	28.7953	28.968	28.8433	28.8228	28.8415
P13646	K1C13_HUMAN	2	27.0781	27.1361	27.4962	27.5557	27.4058
P02533	K1C14_HUMAN	2	27.0426	27.1152	27.4938	27.5448	27.4156
P08779	K1C16_HUMAN	3	27.0611	27.1562	27.5167	27.5626	27.4367
P05783	K1C18_HUMAN	26	31.6637	31.8077	31.9019	31.9195	31.864
P08727	K1C19_HUMAN	2	29.5352	29.537	29.7241	29.8629	29.7517
Q7Z3Z0	K1C25_HUMAN	2	25.747	25.9681	26.1984	26.3517	26.3245
Q7Z3Y8	K1C27_HUMAN	2	25.747	25.9681	26.1984	26.3517	26.3245
Q7Z3Y7	K1C28_HUMAN	3	27.3395	27.5234	27.8518	27.9419	27.8285
P35527	K1C9_HUMAN	8	27.5	27.0175	27.1837	27.0524	27.0023
Q8IYS2	K2013_HUMAN	3	24.3877	24.153	24.0163	24.1474	24.0359
P35908	K22E_HUMAN	14	26.7204	26.337	26.4131	26.5183	26.4779
Q01546	K22O_HUMAN	5	24.9507	24.5319	24.6511	24.7	24.5207
P04264	K2C1_HUMAN	24	30.3143	30.5662	30.4481	30.5243	30.4607
Q7Z794	K2C1B_HUMAN	2	28.8486	28.9944	29.1932	29.399	29.2761
P12035	K2C3_HUMAN	3	24.2531	23.4951	23.0236	23.1433	23.1688
P19013	K2C4_HUMAN	2	28.172	28.3534	28.4721	28.7105	28.5906
P13647	K2C5_HUMAN	6	28.7178	28.8114	28.8457	29.0782	28.9653
P02538	K2C6A_HUMAN	9	28.0057	28.0798	28.2816	28.376	28.3786
P04259	K2C6B_HUMAN	11	28.3364	28.5132	28.6361	28.7184	28.7279
P48668	K2C6C_HUMAN	9	27.3334	27.2597	27.1641	27.332	27.2112
P08729	K2C7_HUMAN	4	28.5074	28.5289	28.5636	28.8639	28.7274
Q14CN4	K2C72_HUMAN	2	28.3565	28.4343	28.567	28.8139	28.692
O95678	K2C75_HUMAN	5	28.6639	28.7913	28.8003	29.0433	28.9344
Q8N1N4	K2C78_HUMAN	1	20.5024	16.6925	20.8341	20.4628	17.7881
Q5XKE5	K2C79_HUMAN	5	28.3623	28.606	28.5527	28.8116	28.7237
P05787	K2C8_HUMAN	30	32.6139	32.5883	32.505	32.5272	32.4718
Q8IZA0	K319L_HUMAN	3	23.4592	23.5527	23.2216	23.6213	23.4686
P00568	KAD1_HUMAN	5	27.7216	27.3219	27.3978	27.4619	27.4188
P54819	KAD2_HUMAN	12	30.099	30.033	29.9523	30.1749	30.1076
Q9UIJ7	KAD3_HUMAN	14	28.2409	27.9311	28.1833	28.2071	28.1878
P27144	KAD4_HUMAN	9	27.7513	27.3948	27.4993	27.5259	27.4823
Q14678	KANK1_HUMAN	1	21.0547	20.8509	20.2579	20.4503	21.326
P10644	KAP0_HUMAN	5	25.2157	25.0804	24.9492	24.7986	25.0787
P31321	KAP1_HUMAN	2	22.9039	22.8703	22.5418	22.5184	22.816
P13861	KAP2_HUMAN	15	28.3668	28.5758	28.6268	28.7292	28.7621
P31323	KAP3_HUMAN	2	26.5188	26.8102	26.8225	26.906	26.9448
P17612	KAPCA_HUMAN	4	23.7341	24.3276	24.2288	23.9848	24.204
P22694	KAPCB_HUMAN	4	24.9101	25.2114	25.1458	24.93	25.0162
Q16773	KAT1_HUMAN	4	23.8514	24.0608	24.2111	24.4885	24.2931
Q6YP21	KAT3_HUMAN	9	27.8121	28.0605	27.8044	27.8167	27.7702
O75600	KBL_HUMAN	3	23.745	23.7058	23.4317	23.289	23.5084
Q9NYS0	KBRS1_HUMAN	2	22.5503	22.7902	22.3253	22.7077	22.5778
Q9NYR9	KBRS2_HUMAN	2	22.1681	22.1843	22.1392	22.454	22.8234
O94819	KBTBB_HUMAN	2	23.6616	23.364	23.3417	23.2946	23.0689
P48729	KC1A_HUMAN	7	25.5664	25.6759	25.6781	25.9543	25.8097
Q8N752	KC1AL_HUMAN	4	24.6704	24.7829	24.8298	25.0557	24.9976
P48730	KC1D_HUMAN	2	23.3874	23.0151	23.3329	23.2246	23.2678
P49674	KC1E_HUMAN	2	23.9296	23.7422	23.9278	23.503	23.7409
Q9HCP0	KC1G1_HUMAN	2	24.1781	23.3693	23.9945	24.0326	23.7191
P78368	KC1G2_HUMAN	4	24.8461	24.101	24.4788	24.6247	24.4511
Q9Y6M4	KC1G3_HUMAN	5	24.8013	23.9981	24.37	24.5637	24.2875
Q13303	KCAB2_HUMAN	2	23.2976	23.1379	23.3039	22.7971	23.082
Q14012	KCC1A_HUMAN	2	23.3753	22.9758	23.0426	23.0683	23.2523
Q9UQM7	KCC2A_HUMAN	3	28.0919	28.2096	28.177	28.2609	28.1601
Q13554	KCC2B_HUMAN	10	28.822	29.0734	29.0029	28.9547	29.0187
Q13557	KCC2D_HUMAN	8	28.4998	28.5942	28.5587	28.6143	28.5085
Q13555	KCC2G_HUMAN	13	28.7663	28.7744	28.8559	28.8279	28.8307
Q9BQ13	KCD14_HUMAN	1	22.3828	21.1869	20.884	20.4624	21.0621
O60928	KCJ13_HUMAN	8	29.9816	30.0262	30.1903	30.1765	30.0883
Q9H2S1	KCNN2_HUMAN	2	20.4466	20.7035	20.4925	19.9653	19.9028
P56696	KCNQ4_HUMAN	6	25.2316	25.1574	25.0446	25.1907	25.1861
P12277	KCRB_HUMAN	16	31.3582	31.6572	31.4922	31.5714	31.6417
P17540	KCRS_HUMAN	10	28.7439	28.8123	28.755	28.7423	28.7369
P12532	KCRU_HUMAN	8	27.754	27.7956	27.8276	27.922	27.8624
Q14681	KCTD2_HUMAN	3	22.5536	23.1392	22.9914	23.293	23.1209
Q8WVF5	KCTD4_HUMAN	7	27.0378	27.1286	26.7794	26.9883	26.9611
P30085	KCY_HUMAN	5	26.0311	26.0221	25.9066	25.7564	26.0614
Q9ULH0	KDIS_HUMAN	5	24.1127	23.8916	23.8862	23.8141	23.8651
Q06136	KDSR_HUMAN	7	28.4341	28.4663	28.352	28.6645	28.5108
Q16774	KGUA_HUMAN	3	24.8538	24.908	24.9021	24.9521	24.9948
Q07666	KHDR1_HUMAN	2	23.6769	23.5423	24.24	23.7505	24.1157
Q9H1H9	KI13A_HUMAN	5	22.9022	22.7179	22.735	22.6393	22.2753
Q9NQT8	KI13B_HUMAN	5	23.7761	24.0989	23.6214	23.7623	23.8941
Q7Z4S6	KI21A_HUMAN	2	23.4366	23.6541	23.8257	23.7661	23.9719
O75037	KI21B_HUMAN	2	21.894	22.295	21.8044	22.1809	21.4946
Q8IX03	KIBRA_HUMAN	2	22.831	22.3087	22.4247	22.6576	22.6824
Q12756	KIF1A_HUMAN	5	25.2948	25.3949	25.2672	25.3407	25.1667
O60333	KIF1B_HUMAN	1	22.436	22.8465	22.4516	22.2733	22.386
O43896	KIF1C_HUMAN	1	21.6491	22.921	22.4861	22.3736	22.6369
Q02241	KIF23_HUMAN	1	20.5135	20.6797	19.9209	20.0826	20.6376
Q12840	KIF5A_HUMAN	3	24.854	23.7624	23.9266	24.0994	24.014
O60282	KIF5C_HUMAN	3	24.988	24.1735	24.184	24.3787	24.1446
Q03426	KIME_HUMAN	2	24.4832	24.0998	24.1388	24.2253	24.0975
P33176	KINH_HUMAN	17	26.6932	26.309	26.2488	26.3473	26.2789
Q96J84	KIRR1_HUMAN	4	24.3615	24.0979	24.1347	23.5987	23.9456
Q8TBQ9	KISHA_HUMAN	2	26.2663	26.4545	26.3525	26.2686	26.3873
O00142	KITM_HUMAN	2	23.8723	24.055	23.7653	23.6444	23.8539
Q07866	KLC1_HUMAN	8	25.6386	25.4899	25.2073	25.3549	25.2512
Q9H0B6	KLC2_HUMAN	3	24.1613	23.6143	23.8564	23.9581	23.8004
Q6P597	KLC3_HUMAN	4	24.788	24.3521	24.0707	24.49	24.5325
Q9NSK0	KLC4_HUMAN	4	25.1675	24.7253	24.605	24.9335	24.7591
Q53GT1	KLH22_HUMAN	1	22.3179	21.551	21.6379	21.9736	21.5302
P01042	KNG1_HUMAN	2	23.5336	23.0828	23.0039	22.8873	23.0792
P46020	KPB1_HUMAN	4	23.9834	24.1401	23.6619	23.601	23.9388
P46019	KPB2_HUMAN	1	20.0713	19.3911	19.9757	18.4326	19.1172
Q93100	KPBB_HUMAN	10	25.5588	25.187	25.2002	25.2919	25.2745
P17252	KPCA_HUMAN	7	27.4815	27.4892	27.5085	27.3779	27.4662
P05771	KPCB_HUMAN	23	29.0584	29.2136	28.9758	28.9541	29.0259
Q04759	KPCT_HUMAN	6	26.2455	25.9951	26.0183	26.1184	26.0761
Q14558	KPRA_HUMAN	4	25.1699	24.9895	24.9461	24.6374	24.7759
O60256	KPRB_HUMAN	4	24.5913	24.7294	24.4946	24.4268	24.2994
P14618	KPYM_HUMAN	33	32.8904	33.1918	33.0802	33.1198	33.134
Q96MU8	KREM1_HUMAN	4	24.2021	23.9417	23.7445	23.6952	23.7337
O00522	KRIT1_HUMAN	5	26.5243	26.2946	25.8734	26.0709	26.1527
Q92764	KRT35_HUMAN	2	27.2831	27.2911	27.6771	27.762	27.6134
Q9NSB2	KRT84_HUMAN	3	28.2854	28.3747	28.434	28.6829	28.5506
Q8IVT5	KSR1_HUMAN	4	23.5296	22.9813	22.9274	23.2086	22.6866
Q86UP2	KTN1_HUMAN	86	32.6402	32.72	32.6727	32.7313	32.6762
Q9BQD3	KXDL1_HUMAN	2	25.1607	24.7148	24.688	24.6584	24.7484
Q6P1M3	L2GL2_HUMAN	4	24.8712	24.9467	24.8403	24.6714	24.7918
Q9H9P8	L2HDH_HUMAN	5	26.1384	26.1531	26.1473	26.3136	26.2519
P05455	LA_HUMAN	9	25.5587	26.0334	26.1621	26.2572	26.1431
Q53H82	LACB2_HUMAN	7	25.817	25.3583	25.6017	25.8311	25.5355
P83111	LACTB_HUMAN	2	22.9902	22.8398	23.3698	22.3746	22.8399
P07942	LAMB1_HUMAN	16	26.9694	26.8185	26.7232	26.6373	26.695
P55268	LAMB2_HUMAN	23	28.0954	27.8046	27.7285	27.6359	27.6573
P11047	LAMC1_HUMAN	2	21.3721	21.199	20.9392	20.592	20.8312
P11279	LAMP1_HUMAN	4	27.8268	28.1002	28.0139	27.9475	28.2066
P13473	LAMP2_HUMAN	5	30.4649	30.4578	30.5798	30.6472	30.7067
O43813	LANC1_HUMAN	2	23.9691	23.6546	23.3764	23.2162	23.0519
Q9NS86	LANC2_HUMAN	2	24.8474	25.4096	24.8233	24.426	24.8606
P42166	LAP2A_HUMAN	2	25.5573	25.9637	26.2073	26.669	26.5182
P42167	LAP2B_HUMAN	3	23.9905	23.3956	23.6117	23.8407	23.5753
Q8N3Y3	LARG2_HUMAN	2	22.3681	21.9142	21.7882	22.2263	21.6567
Q6PKG0	LARP1_HUMAN	10	25.9321	25.8061	25.7804	26.0504	25.8908
Q14847	LASP1_HUMAN	5	25.133	24.6987	24.8125	25.2314	24.9772
Q01650	LAT1_HUMAN	6	29.172	29.123	29.4291	29.5591	29.3485
Q9UHI5	LAT2_HUMAN	6	28.4335	28.5713	28.5795	28.6505	28.4276
Q8N370	LAT4_HUMAN	3	23.1693	22.6653	22.7624	23.2412	22.9866
P18428	LBP_HUMAN	3	25.5828	25.4486	25.0098	25.2695	25.2151
O95232	LC7L3_HUMAN	2	21.6137	21.3422	20.837	20.1767	20.7089
Q9UIQ6	LCAP_HUMAN	8	26.1935	26.1636	26.2144	26.2702	26.1752
Q6UWP7	LCLT1_HUMAN	2	23.6729	23.5026	23.8314	23.9739	23.8665
Q9H6V9	LDAH_HUMAN	8	27.2045	27.5425	27.2044	27.3472	27.5045
Q6ZMR3	LDH6A_HUMAN	1	26.1144	25.6913	26.258	26.3601	26.3865
P00338	LDHA_HUMAN	13	28.5664	28.5604	28.5932	28.7668	28.7584
P07195	LDHB_HUMAN	15	31.3652	31.4093	31.5479	31.6197	31.5798
Q86WU2	LDHD_HUMAN	10	26.901	26.7875	26.8708	26.8412	26.9311
P01130	LDLR_HUMAN	2	24.4016	24.4045	24.0711	23.8956	23.6316
P09382	LEG1_HUMAN	6	28.6386	28.7672	28.7976	28.8609	28.8665
P17931	LEG3_HUMAN	6	26.1518	26.1134	26.2405	26.5284	26.2844
O00182	LEG9_HUMAN	2	23.905	23.6609	23.5012	24.226	23.6287
Q3ZCW2	LEGL_HUMAN	2	23.3055	24.1543	23.8208	24.0585	23.8372
Q8NC56	LEMD2_HUMAN	8	27.082	26.8862	26.8498	27.0589	27.0367
O95202	LETM1_HUMAN	25	30.3031	30.4274	30.3711	30.4234	30.3278
Q08380	LG3BP_HUMAN	9	28.3281	28.5929	28.3713	28.4587	28.4533
Q92604	LGAT1_HUMAN	13	29.9334	29.9829	29.8019	29.7525	29.8813
O95970	LGI1_HUMAN	3	23.0057	23.1332	22.9017	23.4461	23.2934
Q99538	LGMN_HUMAN	3	25.7714	25.3767	25.2229	25.2476	25.2684
Q04760	LGUL_HUMAN	5	26.9575	26.5395	26.6024	26.8323	26.757
Q9H008	LHPP_HUMAN	2	23.1403	23.2982	22.7902	22.4599	22.8796
P38571	LICH_HUMAN	2	24.0778	24.4561	23.9835	23.8695	23.8849
Q9UPQ0	LIMC1_HUMAN	23	27.5954	27.2845	27.3905	27.4337	27.3755
Q9UGP4	LIMD1_HUMAN	3	23.0106	22.6352	22.5639	22.6934	22.8063
O14910	LIN7A_HUMAN	5	26.6599	26.5509	26.8863	26.9882	26.8649
Q9HAP6	LIN7B_HUMAN	2	26.6242	26.3636	26.7897	26.899	26.804
Q9NUP9	LIN7C_HUMAN	5	27.8422	27.9903	28.2298	28.2687	28.4111
Q13136	LIPA1_HUMAN	2	22.4203	22.6295	22.3608	22.5932	22.6874
Q8ND30	LIPB2_HUMAN	5	25.2524	25.5857	25.4218	25.4591	25.5791
Q05469	LIPS_HUMAN	16	28.4347	28.4895	28.4688	28.5308	28.5042
P43034	LIS1_HUMAN	5	25.0717	24.9041	25.0697	25.1128	25.056
P09960	LKHA4_HUMAN	13	27.5614	27.5293	27.4742	27.5363	27.5517
Q9H0V9	LMA2L_HUMAN	7	28.3777	28.5888	28.3149	28.4049	28.5223
P49257	LMAN1_HUMAN	21	33.0445	33.0541	33.1056	33.237	33.2193
Q12907	LMAN2_HUMAN	14	30.9527	30.9771	31.0304	30.886	30.9803
Q9NUN5	LMBD1_HUMAN	2	22.8567	22.4327	22.9049	22.8567	22.7117
Q68DH5	LMBD2_HUMAN	2	25.0983	24.6404	24.2803	23.9947	24.0179
Q96S06	LMF1_HUMAN	7	27.8839	28.2456	28.1802	28.1084	28.2657
Q9BU23	LMF2_HUMAN	6	26.7297	27.3682	27.3293	27.1947	27.3256
P02545	LMNA_HUMAN	14	27.3259	27.0523	27.066	27.1922	27.1463
[truncated: 2,326 more rows]
