# Supplementary material for: Quantitative Proteomics of Human Retinal Pigment Epithelium Reveals Key Regulators for the Pathogenesis of Age-Related Macular Degeneration
Source: Int J Mol Sci. 2023 Feb 7;24(4):3252. doi: 10.3390/ijms24043252 (PMC9959910; doi:10.3390/ijms24043252)
Supplement: Supplementary file 1 [file ijms-24-03252-s001.zip › Table S4.xlsx]

## Sheet: Table S4
Table S4. Percentage of MS intensities of the 16 quality markers within each sample. Samples removed are highlighted in red.
Type	ProteinID	Protein name	M1_S1_2	M1_S1_3	M1_S1_4	M1_S1_5	M1_S1_6	M1_S1_7	M1_S1_8	M1_S1_9	M1_S1_10	M1_S1_11	M1_S1_12	M1_S2_1	M1_S2_2	M1_S2_3	M1_S2_4	M1_S2_5	M1_S2_6	M1_S2_7	M1_S2_8	M1_S2_9	M1_S2_10	M1_S2_11	M1_S2_12	M1_S2_13	M1_S2_14	M1_S2_15	M1_S2_16	M1_S2_17	M1_S2_18	M1_S2_19	M1_S2_20	M1_S2_21	M2_S1_1	M2_S1_2	M2_S1_3	M2_S1_4	M2_S1_5	M2_S1_6	M2_S1_7	M2_S1_8	M2_S1_9	M2_S1_10	M2_S1_11	M2_S2_1	M2_S2_2	M2_S2_3	M2_S2_4
Erythrocyte	CAH1	Carbonic anhydrase 1	0.0999915	0.122496	0.00647255	0.00679466	0.0205933	0.00960213	0.0042858	0.00438109	0.00353444	0.0178758	0.00635667	0.00596865	0.00721422	0.0209811	0.00640546	0.00571718	0.00545508	0.00799823	0.00996716	0.00869227	0.0144621	0.00530743	0.0116065	0.0331371	0.00543562	0.00659725	0.0050673	0.0103254	0.0418833	0.00526059	0.0137004	0.0111145	0.00453194	0.00527138	0.00604581	0.0669394	0.00607523	0.0221496	0.0447396	0.00919352	0.00698871	0.00411072	0.00775009	0.0543232	0.0162332	0.00649981	0.0797501
	CAH2	Carbonic anhydrase 2	0.0139779	0.0186563	0.00460581	0.00685854	0.00466015	0.00765415	0.0056095	0.00430827	0.00301349	0.00742618	0.0079287	0.0101096	0.00796001	0.00702621	0.0119588	0.00407354	0.00776982	0.00388919	0.00873122	0.00907984	0.00840605	0.00620197	0.0110183	0.00843806	0.00469573	0.0107123	0.00693657	0.0045752	0.00786908	0.00447846	0.00789505	0.00607205	0.00286792	0.0059329	0.00948933	0.0126814	0.00980331	0.00838928	0.0117345	0.00564591	0.00527261	0.0040369	0.00862494	0.0140958	0.00452321	0.0115288	0.0169711
	HBD	Hemoglobin subunit delta	3.56628	5.05006	0.0611288	0.05853	0.534273	0.200638	0.0494389	0.0638593	0.0509711	0.679502	0.0449077	0.0319647	0.0904355	0.717381	0.0368499	0.06812	0.0751853	0.161502	0.113575	0.161511	0.392674	0.111071	0.223896	0.905038	0.0508503	0.0889447	0.0421476	0.102252	1.05264	0.110024	0.25285	0.234866	0.0624031	0.0480439	0.143292	2.20369	0.121214	0.598109	2.20216	0.182199	0.183398	0.0322688	0.176569	0.925311	0.228226	0.0723825	2.0927
	CATA	Catalase	0.0833953	0.160915	0.27159	0.123189	0.200609	0.1602	0.268816	0.151304	0.0591075	0.206312	0.230607	0.119719	0.116338	0.0929101	0.118588	0.224136	0.11545	0.155365	0.205011	0.121706	0.138518	0.13435	0.103728	0.182887	0.146489	0.128452	0.093988	0.0504651	0.263162	0.140171	0.156653	0.146394	0.19121	0.083442	0.149085	0.106297	0.130705	0.16327	0.12202	0.164878	0.148075	0.0751726	0.132211	0.158442	0.0929108	0.190503	0.12033
	PRDX2	Peroxiredoxin-2	0.0480582	0.0511525	0.0250355	0.0190572	0.017489	0.0262346	0.0183154	0.0131847	0.0082007	0.0294469	0.0330815	0.041156	0.0374379	0.0336408	0.0403614	0.0272132	0.0216008	0.032172	0.0243026	0.0236825	0.0256435	0.0208031	0.0213671	0.0336228	0.0310254	0.0245529	0.0298645	0.0461596	0.0251292	0.0152427	0.0444511	0.0414889	0.0238007	0.0207122	0.0135104	0.0363669	0.0339694	0.0175821	0.0562396	0.0309271	0.0221011	0.0214575	0.0300322	0.0277212	0.0418433	0.0360476	0.0705266
	HBB	Hemoglobin subunit beta	7.81107	11.3473	0.132626	0.131138	1.49462	0.423832	0.107749	0.122934	0.125121	1.56976	0.108406	0.0691031	0.222253	1.77151	0.0768973	0.159257	0.163001	0.349858	0.245861	0.344026	0.946337	0.265317	0.516148	2.0544	0.138254	0.214701	0.109311	0.264689	2.58409	0.282341	0.566242	0.567912	0.109829	0.107318	0.304258	4.97244	0.252237	1.50255	4.78843	0.395036	0.478464	0.0708935	0.414482	2.02849	1.17168	0.168784	4.30793
	HBA	Hemoglobin subunit alpha	3.41439	5.46105	0.0780971	0.0762475	0.951997	0.221387	0.0667979	0.0707162	0.0722897	0.739211	0.0828997	0.0423189	0.113022	0.793394	0.0470426	0.0889764	0.0877791	0.181193	0.133731	0.182997	0.506738	0.147053	0.27211	1.05204	0.0755323	0.113322	0.0586263	0.129014	1.43879	0.162826	0.32836	0.286099	0.0740595	0.0534551	0.139809	2.11224	0.151557	0.764837	2.14302	0.192472	0.254105	0.0468776	0.214004	1.3162	0.316341	0.0850753	1.97612
Platelet	TSP1	Thrombospondin-1	0.000500493	0.000139917	0.000273921	0.000131741	0.00013078	0.000192973	0.000312671	0.00045155	0.000383856	0.000188803	0.000152825	0.000205326	0.000225321	0.000202442	0.000256137	0.000196087	0.000234005	0.000272453	0.000353024	0.000262305	0.000276084	0.00017008	8.81021e-05	0.000149133	9.09244e-05	0.000273177	0.000233473	0.000288365	0.000175752	0.00022628	0.000259575	0.000147186	0.000124837	0.000652836	0.000236126	0.000312239	0.000246	0.000204085	0.000316809	0.000176433	0.000259957	0.000342789	0.000178092	0.00026	0.000128787	0.000233673	0.000246363
	ACTN1	Alpha-actinin-1	0.0669943	0.0363937	0.0517394	0.0370318	0.0333021	0.0398944	0.0475417	0.0181129	0.0241651	0.0464114	0.0486886	0.0691364	0.0459371	0.0545129	0.0553673	0.0391592	0.0300358	0.0632691	0.0350917	0.0277414	0.03056	0.0284215	0.0200055	0.0277861	0.035034	0.0370133	0.0275453	0.0534767	0.0198279	0.032225	0.0550208	0.0595977	0.0349293	0.0443445	0.0292844	0.0254913	0.0379033	0.0357621	0.0724129	0.0489446	0.0486512	0.0299828	0.0428193	0.0222719	0.0416471	0.0472177	0.0393214
	VINC	Vinculin	0.0144135	0.00900732	0.0115759	0.0127016	0.01288	0.0103042	0.010348	0.00730127	0.0110127	0.0122123	0.0161376	0.0119911	0.0120231	0.0131811	0.0140716	0.0100406	0.0181799	0.0118575	0.0203379	0.0115667	0.0147332	0.0112949	0.00964293	0.0104417	0.0119641	0.0125849	0.00977431	0.0155419	0.00671914	0.00822982	0.0126847	0.0136386	0.00911426	0.0111449	0.00778341	0.0157545	0.0138387	0.00877616	0.0185838	0.0160893	0.011514	0.0175224	0.0103658	0.00923673	0.0104397	0.0144486	0.017617
	FLNA	Filamin-A	0.0440094	0.0119447	0.0154211	0.0156487	0.018871	0.0126256	0.0128031	0.00592131	0.00938257	0.023042	0.0208691	0.016574	0.0194259	0.0204247	0.0135184	0.00815651	0.00808907	0.0149213	0.0172654	0.014013	0.0101506	0.00792332	0.00908678	0.00965154	0.00957193	0.0100588	0.00998335	0.0148592	0.0131532	0.0169611	0.010735	0.0145695	0.0136453	0.0664345	0.00932998	0.0188388	0.0156735	0.0218326	0.0515205	0.0162526	0.0204496	0.0139903	0.00932685	0.009109	0.0253463	0.0092697	0.014917
	MYH9	Myosin-9	0.102512	0.0216425	0.0275247	0.0437818	0.0413652	0.032861	0.0337671	0.0224944	0.0216388	0.0335681	0.0407061	0.0406052	0.0462689	0.0626635	0.0441842	0.0258934	0.0464775	0.0484983	0.0630638	0.0517938	0.0317468	0.0339938	0.0457129	0.031005	0.0288179	0.0361376	0.0424362	0.0291528	0.0426149	0.0268883	0.0200487	0.0261665	0.0256582	0.307581	0.0215598	0.0567603	0.0421943	0.0428882	0.100671	0.0293702	0.0681187	0.0301404	0.0349205	0.0546313	0.0420421	0.0298047	0.0424677
	ACTB	Actin, cytoplasmic 1	2.85315	1.32462	1.70739	1.63418	1.19355	1.62925	1.78768	0.883859	1.07265	1.92608	1.78098	2.21597	2.14713	2.85589	2.39438	1.3833	1.08418	2.5912	1.33663	1.27579	1.17579	1.14204	0.866131	1.30492	1.47175	1.39958	1.59519	2.7351	0.949477	1.41364	2.93227	2.85783	1.37349	1.7259	1.14612	1.11789	1.8552	1.95504	2.43772	2.18464	1.90157	1.13032	1.61627	0.825587	2.36173	1.83573	1.43518
	TPM4	Tropomyosin alpha-4 chain	0.00439915	0.00104419	0.00138895	0.000679279	0.00231441	0.00112715	0.000879081	0.000580336	0.0005322	0.00110684	0.00194265	0.00121334	0.00101923	0.00119488	0.00100825	0.000954046	0.000991913	0.00119958	0.00134286	0.000999209	0.00088557	0.000720266	0.000638277	0.000819176	0.000770642	0.0010126	0.000859706	0.000875289	0.00131876	0.000771387	0.000801381	0.000803432	0.000928139	0.00349922	0.00118058	0.00161031	0.00168559	0.00131698	0.00564109	0.000966309	0.00130853	0.000493744	0.000865193	0.00110382	0.00146443	0.000930257	0.00139657
	TLN1	Talin-1	0.0208768	0.00733759	0.0098076	0.0094409	0.00856493	0.00790498	0.00741957	0.0042717	0.00419873	0.0106755	0.0134323	0.0110273	0.0123481	0.015842	0.0113116	0.00567169	0.00788748	0.00874096	0.00847654	0.0072967	0.00737642	0.00476824	0.00704969	0.00893887	0.00821769	0.00763617	0.00670153	0.0127226	0.00559375	0.00558908	0.00888016	0.0111754	0.00744485	0.0324587	0.00573784	0.0140156	0.00937913	0.00837056	0.031847	0.0120144	0.0102314	0.0126018	0.00865867	0.00489672	0.00706889	0.00978745	0.014461
Serum/Plasma	ALBU	Albumin	0.253856	0.0956175	0.076356	0.146387	0.136506	0.136143	0.0648466	0.203435	0.104316	0.0958039	0.188281	0.150505	0.190854	0.217882	0.210202	0.288107	0.217787	0.253688	0.308704	0.279382	0.270822	0.153512	0.266226	0.153915	0.169436	0.0979359	0.171087	0.0814438	0.297747	0.0798328	0.222941	0.0916199	0.194508	0.877638	0.163616	0.530989	0.135557	0.188741	0.353442	0.156299	0.148593	0.153984	0.128087	0.160011	0.18428	0.123584	0.322687
Erythyocyte_Total			15.0372	22.2116	0.579556	0.421815	3.22424	1.04955	0.521013	0.430688	0.322238	3.24953	0.514186	0.32034	0.59466	3.43684	0.338103	0.577493	0.476242	0.891977	0.741178	0.851695	2.03278	0.690102	1.15987	4.26956	0.452283	0.587282	0.345942	0.60748	5.41356	0.720344	1.37015	1.29395	0.468702	0.324175	0.76549	9.51066	0.705561	3.07689	9.36834	0.980351	1.0984	0.254818	0.983673	4.52458	1.87176	0.57082	8.66433
Platelet_Total			3.10686	1.41213	1.82512	1.7536	1.31098	1.73416	1.90075	0.942992	1.14396	2.05328	1.92291	2.36673	2.28437	3.02391	2.5341	1.47337	1.19608	2.73996	1.48256	1.38946	1.27151	1.22933	0.958355	1.39371	1.56622	1.5043	1.69272	2.86202	1.03888	1.50453	3.0407	2.98393	1.46533	2.19201	1.22124	1.25067	1.97612	2.07419	2.71872	2.30845	2.06211	1.23539	1.72341	0.927097	2.48987	1.94742	1.56561
Albumin			0.253856	0.0956175	0.076356	0.146387	0.136506	0.136143	0.0648466	0.203435	0.104316	0.0958039	0.188281	0.150505	0.190854	0.217882	0.210202	0.288107	0.217787	0.253688	0.308704	0.279382	0.270822	0.153512	0.266226	0.153915	0.169436	0.0979359	0.171087	0.0814438	0.297747	0.0798328	0.222941	0.0916199	0.194508	0.877638	0.163616	0.530989	0.135557	0.188741	0.353442	0.156299	0.148593	0.153984	0.128087	0.160011	0.18428	0.123584	0.322687
Total			18.3979	23.7194	2.48103	2.3218	4.67173	2.91985	2.48661	1.57711	1.57052	5.39862	2.62537	2.83757	3.06989	6.67864	3.08241	2.33897	1.8901	3.88562	2.53244	2.52054	3.57511	2.07294	2.38445	5.81719	2.18794	2.18952	2.20975	3.55094	6.75019	2.30471	4.63379	4.3695	2.12854	3.39383	2.15034	11.2923	2.81723	5.33982	12.4405	3.4451	3.3091	1.64419	2.83517	5.61169	4.54591	2.64183	10.5526
[truncated: 30 more columns]
