# Supplementary material for: Quantitative Proteomics of Human Retinal Pigment Epithelium Reveals Key Regulators for the Pathogenesis of Age-Related Macular Degeneration
Source: Int J Mol Sci. 2023 Feb 7;24(4):3252. doi: 10.3390/ijms24043252 (PMC9959910; doi:10.3390/ijms24043252)
Supplement: Supplementary file 1 [file ijms-24-03252-s001.zip › Table S7.xlsx]

## Sheet: Table S7
Table S7. A totalof 19 protein classifiers identified by supervised machine learning analysis.
ProteinAC	ProteinID	p-value	Log2Ratio	Importance,RF_scaled	Importance,RF	Importance,SVM_scaled	Importance,SVM
P12544	GRAA_HUMAN	0.0379682	0.733602	100	2.67335	100	0.714167
Q3MHD2	LSM12_HUMAN	0.00301875	-0.763236	41.8844	1.13395	95.4545	0.708333
Q13546	RIPK1_HUMAN	0.00383167	-0.240406	32.322	0.880658	94.1558	0.706667
Q9UKK9	NUDT5_HUMAN	0.0140976	0.182637	14.3014	0.403319	85.0649	0.695
Q9UI32	GLSL_HUMAN	0.00797954	0.399489	30.4903	0.832139	82.4675	0.691667
Q7Z6L1	TCPR1_HUMAN	0.00271097	0.445251	16.7923	0.469298	82.4675	0.691667
Q9BZJ0	CRNL1_HUMAN	0.0265532	0.605847	18.4804	0.514014	81.8182	0.690833
Q9Y2K6	UBP20_HUMAN	0.00783519	-0.294057	13.5808	0.384231	81.8182	0.690833
O15231	ZN185_HUMAN	0.00302885	-0.727383	17.606	0.490852	81.1688	0.69
P62854	RS26_HUMAN	0.00684151	0.349828	12.684	0.360476	79.8701	0.688333
P62701	RS4X_HUMAN	0.00698505	0.270838	13.6094	0.384988	77.2727	0.685
Q96ND0	F210A_HUMAN	0.0164547	0.264609	23.641	0.650711	75.974	0.683333
Q9NUL3	STAU2_HUMAN	0.0149532	-0.37292	14.7762	0.415895	75.974	0.683333
P15880	RS2_HUMAN	0.0021731	0.428708	17.1187	0.477945	74.026	0.680833
Q9ULD2	MTUS1_HUMAN	0.0100836	0.513042	15.5112	0.435366	73.3766	0.68
Q93009	UBP7_HUMAN	0.00964049	0.280462	15.2004	0.427131	72.7273	0.679167
Q5HYI8	RABL3_HUMAN	0.0262333	-0.172549	19.6454	0.544873	71.4286	0.6775
Q96SZ6	CK5P1_HUMAN	0.0113452	0.316721	12.3046	0.350425	69.4805	0.675
P09486	SPRC_HUMAN	0.00860223	-0.258228	29.294	0.800452	68.8312	0.674167
